# Supplementary material for: Ancient and recent origins of shared polymorphisms in yeast
Source: Research Square preprint supplement (doi:10.21203/rs.3.rs-2573222/v1), 2023-02-13
Supplement: Supplementary file 1 [file ba97bf5b7c2d8c67715161b1.xlsx]

## Sheet: Table S1
Saccahromyces Cerevisiae strains selected for constructing the Saccharomyces cerevisiae consensus sequence
Original Name	Runcode	Source	Geographic location	Ploidy	Clade	Reference
EXF-5295	BFCOSW	Fermentation	Slovenia	2	1. Wine/European	Peter and De Chiara, Nature, 2018
B-17	CASOSW	Wine	Georgia	2	1. Wine/European (subclade 4)	Capece, Food Micr., 2013
HE006	BCEOSW	Human	French Guiana	2	10. French Guiana human	Angebault, JID, 2013
CEY625	BEEOSW	Human	French Guiana	2	10. French Guiana human	Angebault, JID, 2013
CECT1462	ATVOSW	Beer	UK	4	11. Ale beer	Peter and De Chiara, Nature, 2018
UCD_06-645	CGCOSW	Fruit	Davis, CA, UCD	4	11. Ale beer	Peter and De Chiara, Nature, 2018
MTF2552	CQIOSW	Fermentation	West Africa	2	12. West African cocoa	Jespersen, JID, 2013
MTF2549	CQFOSW	Fermentation	West Africa	2	12. West African cocoa	Jespersen, JID, 2013
DJ65	AVVOSW	Palm wine	Yoboki, Djibouti	3	13. African palm wine	Tapsoba et al., IJFM, 2015
NPA02-1	AKHOSW	Palm wine	Nigeria	2	13. African palm wine	Ezeronye, JAM, 2009
HN10	BAMOSW	Nature	Wuzhi Mountain, Hainan province, China	2	14. CHNIII	Wang, ME, 2012
HN19	BAQOSW	Tree	Wuzhi Mountain, Hainan province, China	2	14. CHNIII	Wang, ME, 2012
SX1	BAGOSW	Tree	Qinling Mountain, Shaanxi province, China	2	15. CHNII	Wang, ME, 2012
SX3	BAHOSW	Tree	Qinling Mountain, Shaanxi province, China	2	15. CHNII	Wang, ME, 2012
HN6	BALOSW	Nature	Bawangling Mountain, Hainan province, China	2	16. CHNI	Wang, ME, 2012
EN14S01	AMHOSW	Soil	Sinyi, Nantou, Taiwan	2	17. Taiwanese	Naumov, A.v.l., 2012
GE14S01-7B	CEIOSW	Soil	Taiwan	2	17. Taiwanese	Naumov, A.v.l., 2012
BJ6	BAIOSW	Fruit	Changping, Beijing, China	2	18. Far East Asia	Wang, ME, 2012
YJM1418	SACE_YCR	Tree	Japan	2	18. Far East Asia	Strope, Gen Res, 2015
UWOPS03-461.4	AKMOSW	Tree	Malaysia	2	19. Malaysian	Naumov, Micr., 2009
UWOPS03-459.1	BMCOSW	Tree	Malaysia	2	19. Malaysian	Naumov, Micr., 2009
CECT10171-5B	CDTOSW	Insect	Spain	2	2. Alpechin	Peter and De Chiara, Nature, 2018
DBVPG6302	BRKOSW	Industrial	Spain	2	2. Alpechin	Peter and De Chiara, Nature, 2018
HN15	BANOSW	Nature	Wuzhi Mountain, Hainan province, China	2	20. CHN V	Wang, ME, 2012
HN16	BAPOSW	Soil	Wuzhi Mountain, Hainan province, China	2	20. CHN V	Wang, ME, 2012
CLQCA_20-156	CCCOSW	Flower	Yasuni, Orellana	2	21. Ecuadorean	Peter and De Chiara, Nature, 2018
YPS617	CMQOSW	Tree	Pennsylvania, USA	2	21. Ecuadorean	Peter and De Chiara, Nature, 2018
YPS163	AVIOSW	Soil	Pennsylvanian	2	23. North American oak	Sniegowski, FEMS YR, 2002
YPS128	AKNOSW	Soil	Pennsylvania, USA	2	23. North American oak	Sniegowski, FEMS YR, 2002
CBS1576	ARGOSW	Tree	Celebes, Sulavesi, Indonesia	2	24. Asian islands	Peter and De Chiara, Nature, 2018
YJM1400	SACE_YCM	Fruit	Philippines	2	24. Asian islands	Strope, Gen Res, 2015
K10	CLLOSW	Sake	Japan	2	25. Sake	Fay, Plos Gen., 2005
K14	CLNOSW	Sake	Japan	2	25. Sake	Fay, Plos Gen., 2005
CLQCA_05-006	AKROSW	Fruit	Guayas, Ecuador	2	26. Asian fermentation	Peter and De Chiara, Nature, 2018
CLIB415	BEHOSW	Fermentation	Taiwan	2	26. Asian fermentation	Peter and De Chiara, Nature, 2018
SM.9.4.BR2	CMTOSW	Bioethanol	Brazil	2	3. Brazilian bioethanol	Antonangelo, Yeast, 2013
SM.9.1.AL1	BVDOSW	Bioethanol	Brazil	2	3. Brazilian bioethanol	Antonangelo, Yeast, 2013
EXF-7197	BFPOSW	Tree	Montenegro	2	4. Mediterranean oak	Peter and De Chiara, Nature, 2018
sample 40	CLBOSW	Tree	Bordeaux, France	2	4. Mediterranean oak	Peter and De Chiara, Nature, 2018
CLIB562	BGPOSW	Dairy	Normandy, France	2	5. French dairy	Peter and De Chiara, Nature, 2018
CLIB553	BGEOSW	Dairy	Normandy, France	2	5. French dairy	Peter and De Chiara, Nature, 2018
CLIB651	BEKOSW	Beer	Chad	4	6. African beer	Peter and De Chiara, Nature, 2018
MAJ_G	BDNOSW	Nature	Majunga, Madagascar	2	6. African beer	Peter and De Chiara, Nature, 2018
NCYC_88	CBNOSW	Beer	UK	2	7. Mosaic beer	Peter and De Chiara, Nature, 2018
CBS4255	ASBOSW	Human, clinical	NA	2	7. Mosaic beer	Peter and De Chiara, Nature, 2018
79	BTCOSW	Bakery	NA	2	8. Mixed origin	Peter and De Chiara, Nature, 2018
CLQCA_10-003	AKTOSW	Insect	Pichincha, Ecuador	2	8. Mixed origin	Peter and De Chiara, Nature, 2018
LCBG-3D6	CPIOSW	Distillery	Tamaulipas, Mexico	2	9. Mexican agave	Hernández, A.v.l, 2012
LCBG-3Y3	CPNOSW	Distillery	Tamaulipas, Mexico	2	9. Mexican agave	Hernández, A.v.l, 2012

## Sheet: Table S2
Saccharomyces Cerevisiae strains included in this study
	ENA Study Accession / Repository	ENA Run Accession	Original Name	Runcode	Source	Geographic location	Ploidy	Clade	Reference
1	http://1002genomes.u-strasbg.fr/files/	NA	RM11-1a	AAAOSW	Wine	California, USA	1	WineEuropean	Peter and De Chiara et al., Nature, 2018
2	http://1002genomes.u-strasbg.fr/files/	NA	CBS422a	AABOSW	Beer	Odessa, Ukraine	1	MosaicsBeer	Peter and De Chiara et al., Nature, 2018
3	http://1002genomes.u-strasbg.fr/files/	NA	CBS2165a	AACOSW	Beer	England	2	Beer	Peter and De Chiara et al., Nature, 2018
4	http://1002genomes.u-strasbg.fr/files/	NA	CBS436a	AADOSW	Sake	Japan	2	Sake-A	Peter and De Chiara et al., Nature, 2018
5	http://1002genomes.u-strasbg.fr/files/	NA	CBS2806a	AAEOSW	Wine	Slovakia	1	WineEuropean4	Peter and De Chiara et al., Nature, 2018
6	http://1002genomes.u-strasbg.fr/files/	NA	CBS428a	AAGOSW	Unknown	NA	1	MosaicsR3	Peter and De Chiara et al., Nature, 2018
7	http://1002genomes.u-strasbg.fr/files/	NA	CBS1388a	AAHOSW	Unknown	NA	1	Other	Peter and De Chiara et al., Nature, 2018
8	http://1002genomes.u-strasbg.fr/files/	NA	CBS2966a	AAIOSW	Distillery	Denmark	1	WineEuropean	Peter and De Chiara et al., Nature, 2018
9	http://1002genomes.u-strasbg.fr/files/	NA	CBS4093a	AAKOSW	Wine	Spain	1	WineEuropean4	Peter and De Chiara et al., Nature, 2018
10	http://1002genomes.u-strasbg.fr/files/	NA	CBS1236-a	AALOSW	Bakery	France	2	MixOrigin	Peter and De Chiara et al., Nature, 2018
11	http://1002genomes.u-strasbg.fr/files/	NA	CLIB192_1b	AAMOSW	Bakery	France	1	MixOrigin	Schacherer et al., Nature, 2009
12	http://1002genomes.u-strasbg.fr/files/	NA	CLIB274_1	AANOSW	Bakery	Czech Republic	2	MixOrigin	Schacherer et al., Nature, 2009
13	http://1002genomes.u-strasbg.fr/files/	NA	CLIB326_1	AAPOSW	Bakery	Australia	2	MixOrigin	Schacherer et al., Nature, 2009
14	http://1002genomes.u-strasbg.fr/files/	NA	CLIB272_2	AAQOSW	Beer	USA	1	MosaicsBeer	Schacherer et al., Nature, 2009
15	http://1002genomes.u-strasbg.fr/files/	NA	CLIB382_1b	AAROSW	Beer	Ireland	1	MosaicsBeer	Schacherer et al., Nature, 2009
16	http://1002genomes.u-strasbg.fr/files/	NA	YJM145_b	AASOSW	Human, clinical	USA	1	MosaicsR3	Schacherer et al., Nature, 2009
17	http://1002genomes.u-strasbg.fr/files/	NA	YJM280_b	AATOSW	Human, clinical	USA	1	MosaicsR3	Schacherer et al., Nature, 2009
18	http://1002genomes.u-strasbg.fr/files/	NA	YJM320b	AAVOSW	Human, clinical	California, USA	1	MosaicsR3	Schacherer et al., Nature, 2009
19	http://1002genomes.u-strasbg.fr/files/	NA	YJM326_b	ABAOSW	Human, clinical	California, USA	1	MosaicsR3	Schacherer et al., Nature, 2009
20	http://1002genomes.u-strasbg.fr/files/	NA	YJM413_b	ABBOSW	Human, clinical	USA	1	AsianFermentation	Schacherer et al., Nature, 2009
21	http://1002genomes.u-strasbg.fr/files/	NA	YJM421_b	ABCOSW	Human, clinical	USA	1	MosaicsR3	Schacherer et al., Nature, 2009
22	http://1002genomes.u-strasbg.fr/files/	NA	YJM428_1b	ABDOSW	Human, clinical	California, USA	2	MosaicsR3	Schacherer et al., Nature, 2009
23	http://1002genomes.u-strasbg.fr/files/	NA	YJM434_1b	ABEOSW	Human, clinical	NA	1	WineEuropean	Schacherer et al., Nature, 2009
24	http://1002genomes.u-strasbg.fr/files/	NA	YJM436_1b	ABFOSW	Human, clinical	NA	1	MosaicsR3	Schacherer et al., Nature, 2009
25	http://1002genomes.u-strasbg.fr/files/	NA	YJM440_1b	ABGOSW	Human, clinical	NA	1	MosaicsR3	Schacherer et al., Nature, 2009
26	http://1002genomes.u-strasbg.fr/files/	NA	YJM454_1b	ABHOSW	Human, clinical	NA	1	MosaicsR3	Schacherer et al., Nature, 2009
27	http://1002genomes.u-strasbg.fr/files/	NA	YJM653_1b	ABIOSW	Human, clinical	USA	1	MosaicsR3	Schacherer et al., Nature, 2009
28	http://1002genomes.u-strasbg.fr/files/	NA	YJM678_1b	ABKOSW	Human, clinical	NA	1	MosaicsR3	Schacherer et al., Nature, 2009
29	http://1002genomes.u-strasbg.fr/files/	NA	CBS2888_1b	ABLOSW	Soil	South Africa	1	SouthAfrica	Peter and De Chiara et al., Nature, 2018
30	http://1002genomes.u-strasbg.fr/files/	NA	CBS3093_1b	ABMOSW	Industrial	Spain	1	Alpechin	Schacherer et al., Nature, 2009
31	http://1002genomes.u-strasbg.fr/files/	NA	CECT10109_1b	ABPOSW	Fruit	Spain	1	WineEuropean	Schacherer et al., Nature, 2009
32	http://1002genomes.u-strasbg.fr/files/	NA	DBVPG1788_1b	ABQOSW	Soil	Finland	1	WineEuropean	Schacherer et al., Nature, 2009
33	http://1002genomes.u-strasbg.fr/files/	NA	DBVPG1794_1b	ABROSW	Soil	Finland	1	WineEuropean	Schacherer et al., Nature, 2009
34	http://1002genomes.u-strasbg.fr/files/	NA	DBVPG3591_1b	ABSOSW	Nature	NA	1	WineEuropean	Schacherer et al., Nature, 2009
35	http://1002genomes.u-strasbg.fr/files/	NA	DBVPG4651_1b	ABTOSW	Nature	Italy	1	WineEuropean	Schacherer et al., Nature, 2009
36	http://1002genomes.u-strasbg.fr/files/	NA	DBVPG6861	ABVOSW	Water	Tijuca forest, Rio de Janeiro, Brazil	3	MixOrigin	Schacherer et al., Nature, 2009
37	http://1002genomes.u-strasbg.fr/files/	NA	EM93_3	ACAOSW	Fruit	California, USA	1	MosaicsR3	Schacherer et al., Nature, 2009
38	http://1002genomes.u-strasbg.fr/files/	NA	TL229S2.2	ACBOSW	Dairy	France	1	MosaicsR3	Schacherer et al., Nature, 2009
39	http://1002genomes.u-strasbg.fr/files/	NA	YPS1000_1b	ACCOSW	Tree	USA	1	SouthAmericaMix1	Schacherer et al., Nature, 2009
40	http://1002genomes.u-strasbg.fr/files/	NA	YPS163_1b	ACDOSW	Tree	USA	1	NorthAmerican	Schacherer et al., Nature, 2009
41	http://1002genomes.u-strasbg.fr/files/	NA	CLIB294_1b	ACFOSW	Distillery	France	1	WineEuropean	Schacherer et al., Nature, 2009
42	http://1002genomes.u-strasbg.fr/files/	NA	CLIB413_1b	ACGOSW	Fermentation	China	1	MosaicsR1	Schacherer et al., Nature, 2009
43	http://1002genomes.u-strasbg.fr/files/	NA	CLIB483_1b	ACHOSW	Cider	Brittany, France	1	MosaicsR1	Schacherer et al., Nature, 2009
44	http://1002genomes.u-strasbg.fr/files/	NA	Y10_1b	ACIOSW	Fruit	Philippines	1	MosaicsR3	Schacherer et al., Nature, 2009
45	http://1002genomes.u-strasbg.fr/files/	NA	Y12_1b	ACKOSW	Palm wine	Ivory Coast	1	AsianFermentation	Schacherer et al., Nature, 2009
46	http://1002genomes.u-strasbg.fr/files/	NA	Y3_1b	ACLOSW	Palm wine	NA	1	MosaicsR3	Schacherer et al., Nature, 2009
47	http://1002genomes.u-strasbg.fr/files/	NA	Y9_4	ACMOSW	Fermentation	Indonesia	1	AsianFermentation	Schacherer et al., Nature, 2009
48	http://1002genomes.u-strasbg.fr/files/	NA	YJM269_1b	ACNOSW	Wine	Austria	1	MosaicsR3	Schacherer et al., Nature, 2009
49	http://1002genomes.u-strasbg.fr/files/	NA	CLIB154_1b	ACPOSW	Wine	Russia	1	WineEuropean1	Schacherer et al., Nature, 2009
50	http://1002genomes.u-strasbg.fr/files/	NA	CLIB219_2b	ACQOSW	Wine	Russia	1	CHN-IV	Schacherer et al., Nature, 2009
51	http://1002genomes.u-strasbg.fr/files/	NA	DBVPG1339_1b	ACROSW	Wine	Netherlands	1	WineEuropean	Schacherer et al., Nature, 2009
52	http://1002genomes.u-strasbg.fr/files/	NA	I14_1b	ACSOSW	Wine	Italy	1	MosaicsR1	Schacherer et al., Nature, 2009
53	http://1002genomes.u-strasbg.fr/files/	NA	UC8_1b	ACTOSW	Wine	South Africa	1	WineEuropean	Schacherer et al., Nature, 2009
54	http://1002genomes.u-strasbg.fr/files/	NA	WE372_1b	ACVOSW	Wine	South Africa	1	WineEuropean	Schacherer et al., Nature, 2009
55	http://1002genomes.u-strasbg.fr/files/	NA	Y55_1b	ADAOSW	Wine	France	1	MosaicsR3	Schacherer et al., Nature, 2009
56	http://1002genomes.u-strasbg.fr/files/	NA	Y9J_1b	ADBOSW	Wine	Japan	1	WineEuropean	Schacherer et al., Nature, 2009
57	http://1002genomes.u-strasbg.fr/files/	NA	UC1_1b	ADCOSW	Wine	France	1	WineEuropean	Schacherer et al., Nature, 2009
58	http://1002genomes.u-strasbg.fr/files/	NA	IL_01_b	ADDOSW	Soil	Illinois, USA	1	WineEuropean2	Schacherer et al., Nature, 2009
59	http://1002genomes.u-strasbg.fr/files/	NA	PW5_b	ADEOSW	Palm wine	Aba, Abia State, Nigeria	1	SouthAmericaMix2	Schacherer et al., Nature, 2009
60	http://1002genomes.u-strasbg.fr/files/	NA	YPS1009_b	ADFOSW	Tree	USA	1	AfricanPalmWine	Schacherer et al., Nature, 2009
61	http://1002genomes.u-strasbg.fr/files/	NA	NC_02_b	ADGOSW	Tree	North Carolina, USA	1	NorthAmerican	Schacherer et al., Nature, 2009
62	http://1002genomes.u-strasbg.fr/files/	NA	T7_b	ADHOSW	Tree	Babler State Park, MO, USA	1	AsianFermentation	Schacherer et al., Nature, 2009
63	http://1002genomes.u-strasbg.fr/files/	NA	YJM981_b	ADIOSW	Human, clinical	Italy	1	WineEuropean2	Schacherer et al., Nature, 2009
64	http://1002genomes.u-strasbg.fr/files/	NA	CLIB208_1	ADKOSW	Bakery	Shanaong, China	2	MosaicsR3	Schacherer et al., Nature, 2009
65	http://1002genomes.u-strasbg.fr/files/	NA	CLIB318_1	ADLOSW	Bakery	Netherlands	2	MixOrigin	Schacherer et al., Nature, 2009
66	http://1002genomes.u-strasbg.fr/files/	NA	CLIB324_2	ADMOSW	Bakery	Vietnam	2	MixOrigin	Schacherer et al., Nature, 2009
67	http://1002genomes.u-strasbg.fr/files/	NA	K1_1	ADNOSW	Sake	Japan	1	Sake-A	Schacherer et al., Nature, 2009
68	http://1002genomes.u-strasbg.fr/files/	NA	Y6_b	ADPOSW	Unknown	French Guiana	2	MixOrigin	Schacherer et al., Nature, 2009
69	http://1002genomes.u-strasbg.fr/files/	NA	K12_2	ADQOSW	Sake	Japan	1	Sake-A	Schacherer et al., Nature, 2009
70	http://1002genomes.u-strasbg.fr/files/	NA	M22_1b	ADROSW	Wine	Italy	1	WineEuropean	Schacherer et al., Nature, 2009
71	http://1002genomes.u-strasbg.fr/files/	NA	T73_1b	ADSOSW	Wine	Alicante, Spain	2	WineEuropean	Schacherer et al., Nature, 2009
72	http://1002genomes.u-strasbg.fr/files/	NA	CBS7765	ADTOSW	Nature	Sweden, Goteborg	1	MosaicsR3	Peter and De Chiara et al., Nature, 2018
73	http://1002genomes.u-strasbg.fr/files/	NA	CBS7903	ADVOSW	Palm wine	Nigeria	1	AfricanPalmWine	Peter and De Chiara et al., Nature, 2018
74	http://1002genomes.u-strasbg.fr/files/	NA	CBS7958	AEAOSW	Industrial	Sao Paulo, Brazil	1	MosaicsBeer	Peter and De Chiara et al., Nature, 2018
75	http://1002genomes.u-strasbg.fr/files/	NA	CBS1171	AEBOSW	Beer	Oranjeboom brewery, Rotterdam, Netherlands	4	Beer	Peter and De Chiara et al., Nature, 2018
76	http://1002genomes.u-strasbg.fr/files/	NA	CBS1248	AECOSW	Beer	NA	Xn	Beer	Peter and De Chiara et al., Nature, 2018
77	http://1002genomes.u-strasbg.fr/files/	NA	CBS2441	AEEOSW	Distillery	NA	3	MosaicsR3	Peter and De Chiara et al., Nature, 2018
78	http://1002genomes.u-strasbg.fr/files/	NA	CBS6414	AEFOSW	Sake	Japan	1	Sake-A	Peter and De Chiara et al., Nature, 2018
79	http://1002genomes.u-strasbg.fr/files/	NA	CBS7962	AEGOSW	Industrial	Brazil	1	Bioethanol	Peter and De Chiara et al., Nature, 2018
80	http://1002genomes.u-strasbg.fr/files/	NA	CBS7964	AEHOSW	Industrial	Brazil	1	Bioethanol	Peter and De Chiara et al., Nature, 2018
81	http://1002genomes.u-strasbg.fr/files/	NA	CBS1428	AEIOSW	Bakery	NA	1	MosaicsR3	Peter and De Chiara et al., Nature, 2018
82	http://1002genomes.u-strasbg.fr/files/	NA	CBS4079	AEKOSW	Wine	Spain	1	WineEuropean4	Peter and De Chiara et al., Nature, 2018
83	http://1002genomes.u-strasbg.fr/files/	NA	CBS1394	AELOSW	Distillery	NA	2	MosaicsR3	Peter and De Chiara et al., Nature, 2018
84	http://1002genomes.u-strasbg.fr/files/	NA	CBS2973	AEMOSW	Beer	NA	1	MixOrigin	Peter and De Chiara et al., Nature, 2018
85	http://1002genomes.u-strasbg.fr/files/	NA	CBS4454	AENOSW	Beer	South Africa	2	AfricanBeer	Peter and De Chiara et al., Nature, 2018
86	http://1002genomes.u-strasbg.fr/files/	NA	CBS1508	AEPOSW	Distillery	NA	2	Mantou7	Peter and De Chiara et al., Nature, 2018
87	http://1002genomes.u-strasbg.fr/files/	NA	CBS1782	AEQOSW	Beer	Japan	1	MosaicsBeer	Peter and De Chiara et al., Nature, 2018
88	http://1002genomes.u-strasbg.fr/files/	NA	CBS2970	AEROSW	Industrial	San Jose sugar mill, Rio Piedras, Puerto Rico	1	MosaicsR2	Peter and De Chiara et al., Nature, 2018
89	http://1002genomes.u-strasbg.fr/files/	NA	CBS4054	AESOSW	Wine	Spain	1	WineEuropean4	Peter and De Chiara et al., Nature, 2018
90	http://1002genomes.u-strasbg.fr/files/	NA	CBS6007	AETOSW	Wine	Spain	1	WineEuropean4	Peter and De Chiara et al., Nature, 2018
91	http://1002genomes.u-strasbg.fr/files/	NA	CBS6216	AEVOSW	Water	Rotterdam, Netherlands	2	MixOrigin	Peter and De Chiara et al., Nature, 2018
92	http://1002genomes.u-strasbg.fr/files/	NA	CBS6503	AFAOSW	Beer	UK	2	MosaicsBeer	Peter and De Chiara et al., Nature, 2018
93	http://1002genomes.u-strasbg.fr/files/	NA	CBS7371	AFBOSW	Beer	UK	1	MosaicsBeer	Peter and De Chiara et al., Nature, 2018
94	http://1002genomes.u-strasbg.fr/files/	NA	CBS7764	AFCOSW	Nature	Goteborg, Sweden	2	MixOrigin	Peter and De Chiara et al., Nature, 2018
95	http://1002genomes.u-strasbg.fr/files/	NA	CBS7960	AFDOSW	Industrial	Sao Paulo, Brazil	1	Bioethanol	Peter and De Chiara et al., Nature, 2018
96	http://1002genomes.u-strasbg.fr/files/	NA	CBS8291	AFEOSW	Water	Sweden	2	MixOrigin	Peter and De Chiara et al., Nature, 2018
97	http://1002genomes.u-strasbg.fr/files/	NA	CBS1252	AFFOSW	Bakery	France	1	MixOrigin	Peter and De Chiara et al., Nature, 2018
98	http://1002genomes.u-strasbg.fr/files/	NA	CBS1387	AFGOSW	Bakery	NA	1	MosaicsR3	Peter and De Chiara et al., Nature, 2018
99	http://1002genomes.u-strasbg.fr/files/	NA	CBS1509	AFHOSW	Distillery	NA	1	Mantou7	Peter and De Chiara et al., Nature, 2018
100	http://1002genomes.u-strasbg.fr/files/	NA	CBS2183	AFIOSW	Wine	Chateau Chalon France	1	WineEuropean4	Peter and De Chiara et al., Nature, 2018
101	http://1002genomes.u-strasbg.fr/files/	NA	CBS2992	AFKOSW	Palm wine	Pakistan	2	AsianIsland	Peter and De Chiara et al., Nature, 2018
102	http://1002genomes.u-strasbg.fr/files/	NA	CBS4456	AFLOSW	Beer	South Africa	1	AfricanBeer	Peter and De Chiara et al., Nature, 2018
103	http://1002genomes.u-strasbg.fr/files/	NA	CBS6412	AFMOSW	Sake	Japan	1	Sake-A	Peter and De Chiara et al., Nature, 2018
104	http://1002genomes.u-strasbg.fr/files/	NA	CBS6413	AFNOSW	Sake	Japan	1	Sake-A	Peter and De Chiara et al., Nature, 2018
105	http://1002genomes.u-strasbg.fr/files/	NA	CBS6505	AFPOSW	Beer	UK	2	MosaicsBeer	Peter and De Chiara et al., Nature, 2018
106	http://1002genomes.u-strasbg.fr/files/	NA	CBS7993	AFQOSW	Water	Rio de Janeiro, Tijuca National Forest, Cushvara River, Brazil	1	MosaicsR2	Peter and De Chiara et al., Nature, 2018
107	http://1002genomes.u-strasbg.fr/files/	NA	CBS7959	AFROSW	Industrial	Sao Paulo, Brazil	1	Bioethanol	Peter and De Chiara et al., Nature, 2018
108	http://1002genomes.u-strasbg.fr/files/	NA	CBS1173	AFSOSW	Fruit	NA	2	Other	Peter and De Chiara et al., Nature, 2018
109	http://1002genomes.u-strasbg.fr/files/	NA	CBS1464	AFTOSW	Human, clinical	Austria	4	MixOrigin	Peter and De Chiara et al., Nature, 2018
110	http://1002genomes.u-strasbg.fr/files/	NA	CBS2814	AFVOSW	Wine	Slovakia	2	WineEuropean4	Peter and De Chiara et al., Nature, 2018
111	http://1002genomes.u-strasbg.fr/files/	NA	CBS3012	AGAOSW	Wine	Cadiz, Spain	2	WineEuropean	Peter and De Chiara et al., Nature, 2018
112	http://1002genomes.u-strasbg.fr/files/	NA	CBS6308	AGBOSW	Beer	South Yorkshire, UK	2	Beer	Peter and De Chiara et al., Nature, 2018
113	http://1002genomes.u-strasbg.fr/files/	NA	CBS2444	AGCOSW	Distillery	Seagrams distillery, Louisville, Kentucky	1	MixOrigin	Schacherer et al., Nature, 2009
114	http://1002genomes.u-strasbg.fr/files/	NA	CBS1385	AGEOSW	Bakery	NA	2	MixOrigin	Peter and De Chiara et al., Nature, 2018
115	http://1002genomes.u-strasbg.fr/files/	NA	CBS1479	AGFOSW	Wine	NA	1	WineEuropean	Peter and De Chiara et al., Nature, 2018
116	http://1002genomes.u-strasbg.fr/files/	NA	CBS1480	AGGOSW	Distillery	NA	2	Mantou7	Peter and De Chiara et al., Nature, 2018
117	http://1002genomes.u-strasbg.fr/files/	NA	CBS1582	AGHOSW	Wine	Portugal	1	WineEuropean	Peter and De Chiara et al., Nature, 2018
118	http://1002genomes.u-strasbg.fr/files/	NA	CBS1590	AGIOSW	Wine	Italy	2	WineEuropean	Peter and De Chiara et al., Nature, 2018
119	http://1002genomes.u-strasbg.fr/files/	NA	CBS2361	AGKOSW	Nature	UK	1	MixOrigin	Peter and De Chiara et al., Nature, 2018
120	http://1002genomes.u-strasbg.fr/files/	NA	CBS4458	AGLOSW	Wine	France	1	WineEuropean	Peter and De Chiara et al., Nature, 2018
121	http://1002genomes.u-strasbg.fr/files/	NA	CBS7961	AGMOSW	Industrial	Sao Paulo, Brazil	1	Bioethanol	Peter and De Chiara et al., Nature, 2018
122	http://1002genomes.u-strasbg.fr/files/	NA	CBS439	AGNOSW	Wine	Germany	1	WineEuropean	Peter and De Chiara et al., Nature, 2018
123	http://1002genomes.u-strasbg.fr/files/	NA	CBS1544	AGPOSW	Fruit	Netherlands	1	MosaicsR3	Peter and De Chiara et al., Nature, 2018
124	http://1002genomes.u-strasbg.fr/files/	NA	CBS1594	AGROSW	Nature	NA	1	AsianIsland	Peter and De Chiara et al., Nature, 2018
125	http://1002genomes.u-strasbg.fr/files/	NA	CBS3013	AGSOSW	Wine	Cadiz, Spain	1	WineEuropean	Peter and De Chiara et al., Nature, 2018
126	http://1002genomes.u-strasbg.fr/files/	NA	CBS3078	AGTOSW	Unknown	NA	1	MosaicsR3	Peter and De Chiara et al., Nature, 2018
127	http://1002genomes.u-strasbg.fr/files/	NA	CBS6223	AGVOSW	Wine	Chile	1	WineEuropean	Peter and De Chiara et al., Nature, 2018
128	http://1002genomes.u-strasbg.fr/files/	NA	CBS6333	AHAOSW	Fruit	Costa Rica	1	MosaicsR3	Peter and De Chiara et al., Nature, 2018
129	http://1002genomes.u-strasbg.fr/files/	NA	CBS4734	AHBOSW	juice of sugar cane	NA	1	SouthAmericaMix3	Peter and De Chiara et al., Nature, 2018
130	http://1002genomes.u-strasbg.fr/files/	NA	CBS7963	AHCOSW	Industrial	Sao Paulo, Brazil	1	Bioethanol	Peter and De Chiara et al., Nature, 2018
131	http://1002genomes.u-strasbg.fr/files/	NA	CBS1192	AHDOSW	Wine	NA	1	WineEuropean	Peter and De Chiara et al., Nature, 2018
132	http://1002genomes.u-strasbg.fr/files/	NA	CBS1194	AHEOSW	Wine	NA	1	WineEuropean	Peter and De Chiara et al., Nature, 2018
133	http://1002genomes.u-strasbg.fr/files/	NA	CBS1540	AHFOSW	Nature	Switzerland	1	MosaicsR1	Peter and De Chiara et al., Nature, 2018
134	http://1002genomes.u-strasbg.fr/files/	NA	CBS1586	AHGOSW	Fruit	NA	1	WineEuropean	Peter and De Chiara et al., Nature, 2018
135	http://1002genomes.u-strasbg.fr/files/	NA	CBS3000	AHHOSW	Palm wine	Denmark	1	AsianIsland	Peter and De Chiara et al., Nature, 2018
136	http://1002genomes.u-strasbg.fr/files/	NA	CBS6914	AHIOSW	Wine	Spain	1	WineEuropean	Peter and De Chiara et al., Nature, 2018
137	http://1002genomes.u-strasbg.fr/files/	NA	CBS2247	AHKOSW	Wine	South Africa	1	WineEuropean4	Peter and De Chiara et al., Nature, 2018
138	http://1002genomes.u-strasbg.fr/files/	NA	CBS3081	AHLOSW	Industrial	Spain	1	Alpechin	Peter and De Chiara et al., Nature, 2018
139	http://1002genomes.u-strasbg.fr/files/	NA	CBS3093	AHMOSW	Industrial	Spain	1	Alpechin	Peter and De Chiara et al., Nature, 2018
140	http://1002genomes.u-strasbg.fr/files/	NA	CBS5635	AHNOSW	Wine	South Africa	1	WineEuropean	Peter and De Chiara et al., Nature, 2018
141	http://1002genomes.u-strasbg.fr/files/	NA	CBS5835	AHPOSW	Wine	Spain	2	WineEuropean4	Peter and De Chiara et al., Nature, 2018
142	http://1002genomes.u-strasbg.fr/files/	NA	CBS440	AHQOSW	Industrial	Taiwan	1	Mantou7	Peter and De Chiara et al., Nature, 2018
143	http://1002genomes.u-strasbg.fr/files/	NA	CBS1227	AHROSW	Human, clinical	Romania	1	WineEuropean	Peter and De Chiara et al., Nature, 2018
144	http://1002genomes.u-strasbg.fr/files/	NA	CBS1419	AHSOSW	Wine	Ghana	1	AfricanPalmWine	Peter and De Chiara et al., Nature, 2018
145	http://1002genomes.u-strasbg.fr/files/	NA	CBS1460	AHTOSW	Fermentation	Indonesia	1	WineEuropean	Peter and De Chiara et al., Nature, 2018
146	http://1002genomes.u-strasbg.fr/files/	NA	CBS1487	AHVOSW	Beer	NA	1	MixOrigin	Peter and De Chiara et al., Nature, 2018
147	http://1002genomes.u-strasbg.fr/files/	NA	CBS2180	AIAOSW	Wine	Italy	1	WineEuropean4	Peter and De Chiara et al., Nature, 2018
148	http://1002genomes.u-strasbg.fr/files/	NA	CBS2805	AIBOSW	Wine	Slovakia	1	WineEuropean4	Peter and De Chiara et al., Nature, 2018
149	http://1002genomes.u-strasbg.fr/files/	NA	CBS2807	AICOSW	Wine	Slovakia	1	WineEuropean4	Peter and De Chiara et al., Nature, 2018
150	http://1002genomes.u-strasbg.fr/files/	NA	CBS2909	AIDOSW	Human	NA	2	Alpechin	Peter and De Chiara et al., Nature, 2018
151	http://1002genomes.u-strasbg.fr/files/	NA	CBS2910	AIEOSW	Human	Portugal	1	Alpechin	Peter and De Chiara et al., Nature, 2018
152	http://1002genomes.u-strasbg.fr/files/	NA	CBS457	AIFOSW	Wine	Italy	2	WineEuropean	Peter and De Chiara et al., Nature, 2018
153	http://1002genomes.u-strasbg.fr/files/	NA	CBS1463	AIGOSW	Beer	NA	1	MosaicsBeer	Peter and De Chiara et al., Nature, 2018
154	http://1002genomes.u-strasbg.fr/files/	NA	C6.1	AIIOSW	Palm wine	Cameroon	2	WineEuropean	Stringini, Food Micr., 2009
155	http://1002genomes.u-strasbg.fr/files/	NA	C15.1	AIKOSW	Nature	Cameroon	2	WineEuropean	Stringini, Food Micr., 2009
156	http://1002genomes.u-strasbg.fr/files/	NA	C10.4	AILOSW	Nature	Cameroon	2	WineEuropean	Stringini, Food Micr., 2009
157	http://1002genomes.u-strasbg.fr/files/	NA	E4	AIMOSW	Wine	Umbria, Italy	2	WineEuropean	Cocolin et al., FEMS YR, 2004
158	http://1002genomes.u-strasbg.fr/files/	NA	MC5	AINOSW	Wine	Ascoli Piceno, Italy	2	WineEuropean	Peter and De Chiara et al., Nature, 2018
159	http://1002genomes.u-strasbg.fr/files/	NA	MC6	AIPOSW	Wine	Umbria, Italy	2	WineEuropean4	Ciani et al, A.v.l., 2004
160	http://1002genomes.u-strasbg.fr/files/	NA	MC7	AIQOSW	Fermentation	Umbria, Italy	2	WineEuropean	Ciani et al, A.v.l., 2004
161	http://1002genomes.u-strasbg.fr/files/	NA	MC8	AIROSW	Wine	Ascoli Piceno, Italy	2	WineEuropean	Peter and De Chiara et al., Nature, 2018
162	http://1002genomes.u-strasbg.fr/files/	NA	MC10	AITOSW	Wine	Umbria, Italy	2	WineEuropean	Ciani et al, A.v.l., 2004
163	http://1002genomes.u-strasbg.fr/files/	NA	NPA07.1	AKBOSW	Palm wine	Nigeria	2	AfricanPalmWine	Ezeronye et al., IJFM, 2009
164	http://1002genomes.u-strasbg.fr/files/	NA	NPA05a1	AKCOSW	Palm wine	Nigeria	3	AfricanPalmWine	Ezeronye et al., IJFM, 2009
165	http://1002genomes.u-strasbg.fr/files/	NA	NPA05b1	AKDOSW	Palm wine	Nigeria	3	AfricanPalmWine	Ezeronye et al., IJFM, 2009
166	http://1002genomes.u-strasbg.fr/files/	NA	NPA03.1	AKEOSW	Palm wine	Nigeria	2	AfricanPalmWine	Ezeronye et al., IJFM, 2009
167	http://1002genomes.u-strasbg.fr/files/	NA	NPA06.1	AKGOSW	Palm wine	Nigeria	2	AfricanPalmWine	Ezeronye et al., IJFM, 2009
168	http://1002genomes.u-strasbg.fr/files/	NA	NPA02-1	AKHOSW	Palm wine	Nigeria	2	AfricanPalmWine	Ezeronye et al., IJFM, 2009
169	http://1002genomes.u-strasbg.fr/files/	NA	DBVPG6044	AKIOSW	Wine	West Africa	2	MosaicsR3	Peter and De Chiara et al., Nature, 2018
170	http://1002genomes.u-strasbg.fr/files/	NA	K12	AKLOSW	Sake	Japan	2	AsianFermentation	Peter and De Chiara et al., Nature, 2018
171	http://1002genomes.u-strasbg.fr/files/	NA	UWOPS03-461.4	AKMOSW	Tree	Malaysia	2	Malaysian	Naumov et al., Micr., 2009
172	http://1002genomes.u-strasbg.fr/files/	NA	YPS128	AKNOSW	Soil	Pennsylvania, USA	2	NorthAmerican	Sniegowski et al., FEMS YR, 2002
173	http://1002genomes.u-strasbg.fr/files/	NA	CLQCA_02-003	AKPOSW	Industrial	Santo Domingo, Ecuador	2	WineEuropean	Peter and De Chiara et al., Nature, 2018
174	http://1002genomes.u-strasbg.fr/files/	NA	CLQCA_04-021	AKQOSW	Insect	Los Rios, Ecuador	2	MosaicsR3	Peter and De Chiara et al., Nature, 2018
175	http://1002genomes.u-strasbg.fr/files/	NA	CLQCA_05-006	AKROSW	Fruit	Guayas, Ecuador	2	Huangjiu	Peter and De Chiara et al., Nature, 2018
176	http://1002genomes.u-strasbg.fr/files/	NA	CLQCA_09-001	AKSOSW	Flower	Imbabura, Ecuador	2	MosaicsR3	Peter and De Chiara et al., Nature, 2018
177	http://1002genomes.u-strasbg.fr/files/	NA	CLQCA_10-003	AKTOSW	Insect	Pichincha, Ecuador	2	MixOrigin	Peter and De Chiara et al., Nature, 2018
178	http://1002genomes.u-strasbg.fr/files/	NA	CLQCA_10-027	AKVOSW	Nature	Pichincha, Ecuador	2	WineEuropean	Peter and De Chiara et al., Nature, 2018
179	http://1002genomes.u-strasbg.fr/files/	NA	CLQCA_10-619	ALAOSW	Insect	Pichincha, Ecuador	2	Huangjiu	Peter and De Chiara et al., Nature, 2018
180	http://1002genomes.u-strasbg.fr/files/	NA	CLQCA_10-620	ALBOSW	Insect	Pichincha, Ecuador	2	Huangjiu	Peter and De Chiara et al., Nature, 2018
181	http://1002genomes.u-strasbg.fr/files/	NA	CLQCA_11-024	ALCOSW	Nature	Cotopaxi, Ecuador	2	Huangjiu	Peter and De Chiara et al., Nature, 2018
182	http://1002genomes.u-strasbg.fr/files/	NA	CLQCA_13-023	ALDOSW	Nature	Bolivar, Ecuador	2	DairyProducts	Peter and De Chiara et al., Nature, 2018
183	http://1002genomes.u-strasbg.fr/files/	NA	CLQCA_17-060	ALEOSW	Insect	Loja, Ecuador	2	WineEuropean	Peter and De Chiara et al., Nature, 2018
184	http://1002genomes.u-strasbg.fr/files/	NA	CLQCA_18-003	ALGOSW	Fruit	Sucumbios, Ecuador	2	MosaicsR3	Peter and De Chiara et al., Nature, 2018
185	http://1002genomes.u-strasbg.fr/files/	NA	CLQCA_19-011	ALHOSW	Nature	Napo, Ecuador	2	Huangjiu	Peter and De Chiara et al., Nature, 2018
186	http://1002genomes.u-strasbg.fr/files/	NA	CLQCA_20-060	ALIOSW	Water	Yasuni National Park, Orellana, Ecuador	2	SouthAmericaMix2	Peter and De Chiara et al., Nature, 2018
187	http://1002genomes.u-strasbg.fr/files/	NA	CLQCA_24SC-235	ALKOSW	Tree	Galapagos, Ecuador	2	Huangjiu	Peter and De Chiara et al., Nature, 2018
188	http://1002genomes.u-strasbg.fr/files/	NA	1999-04-21	ALLOSW	Water	Bratislava, Slovakia	2	WineEuropean	Peter and De Chiara et al., Nature, 2018
189	http://1002genomes.u-strasbg.fr/files/	NA	21-4-0101	ALMOSW	Water	Bratislava, Slovakia	2	WineEuropean	Peter and De Chiara et al., Nature, 2018
190	http://1002genomes.u-strasbg.fr/files/	NA	21-4-0103	ALNOSW	Water	Bratislava, Deninska Nova Ves, Slovakia	2	MixOrigin	Peter and De Chiara et al., Nature, 2018
191	http://1002genomes.u-strasbg.fr/files/	NA	21-4-0105	ALPOSW	Water	Bratislava, Deninska Nova Ves, Slovakia	2	MixOrigin	Peter and De Chiara et al., Nature, 2018
192	http://1002genomes.u-strasbg.fr/files/	NA	21-4-0111	ALQOSW	Tree	Male Zaluzie, Slovakia	2	WineEuropean1	Peter and De Chiara et al., Nature, 2018
193	http://1002genomes.u-strasbg.fr/files/	NA	21-4-0114	ALROSW	Tree	Male levare, Slovakia	3	MosaicsR3	Peter and De Chiara et al., Nature, 2018
194	http://1002genomes.u-strasbg.fr/files/	NA	21-4-0116	ALSOSW	Flower	Male levare, Slovakia	2	WineEuropean1	Peter and De Chiara et al., Nature, 2018
195	http://1002genomes.u-strasbg.fr/files/	NA	21-4-0122	ALTOSW	Flower	Male Zaluzie, Slovakia	2	WineEuropean1	Peter and De Chiara et al., Nature, 2018
196	http://1002genomes.u-strasbg.fr/files/	NA	21-4-0124	ALVOSW	Fruit	Male Zaluzie, Slovakia	3	MixOrigin	Peter and De Chiara et al., Nature, 2018
197	http://1002genomes.u-strasbg.fr/files/	NA	21-4-0125	AMAOSW	Fruit	Male Zaluzie, Slovakia	3	WineEuropean1	Peter and De Chiara et al., Nature, 2018
198	http://1002genomes.u-strasbg.fr/files/	NA	IY_03-5-30-1-1-1_(1)	AMBOSW	Insect	Louisiana, USA	2	NorthAmerican	Nguyen et al., Mycologia, 2007
199	http://1002genomes.u-strasbg.fr/files/	NA	IY_03-5-26-5-1-1_(1)	AMCOSW	Insect	Louisiana, USA	2	NorthAmerican	Nguyen et al., Mycologia, 2007
200	http://1002genomes.u-strasbg.fr/files/	NA	ES4M07	AMDOSW	Fruit	Dongpu, Sinyi Township, Nantou, Taiwan	2	CHN-VI	Naumov et al., A.v.l., 2012
201	http://1002genomes.u-strasbg.fr/files/	NA	ES2M03	AMFOSW	Fruit	Dongpu, Sinyi Township, Nantou, Taiwan	2	CHN-VI	Naumov et al., A.v.l., 2012
202	http://1002genomes.u-strasbg.fr/files/	NA	SJ7L01	AMGOSW	Tree	Tuchih, Nantou, Taiwan	3	MixOrigin	Naumov et al., A.v.l., 2012
203	http://1002genomes.u-strasbg.fr/files/	NA	EN14S01	AMHOSW	Soil	Sinyi, Nantou, Taiwan	2	CHN-IX	Naumov et al., A.v.l., 2012
204	http://1002genomes.u-strasbg.fr/files/	NA	SJ1L04	AMIOSW	Tree	Yuchih, Nantou, Taiwan	3	MixOrigin	Naumov et al., A.v.l., 2012
205	http://1002genomes.u-strasbg.fr/files/	NA	SJ6L01	AMKOSW	Tree	Tuchih, Nantou, Taiwan	3	MixOrigin	Bell et al., LAM, 2001
206	http://1002genomes.u-strasbg.fr/files/	NA	SJ5L11	AMLOSW	Tree	Tuchih, Nantou, Taiwan	3	MixOrigin	Naumov et al., A.v.l., 2012
207	http://1002genomes.u-strasbg.fr/files/	NA	SJ5L12	AMMOSW	Tree	Beinan, Taitung, Taiwan	2	Other	Naumov et al., A.v.l., 2012
208	http://1002genomes.u-strasbg.fr/files/	NA	SJ5L13	AMNOSW	Tree	Tuchih, Nantou, Taiwan	4	MixOrigin	Naumov et al., A.v.l., 2012
209	http://1002genomes.u-strasbg.fr/files/	NA	SJ5L14	AMPOSW	Fruit	Taian, Miaoli, Taiwan	2	MosaicsR1	Naumov et al., A.v.l., 2012
210	http://1002genomes.u-strasbg.fr/files/	NA	SJ5L15	AMQOSW	Tree	Tuchih, Nantou, Taiwan	3	MixOrigin	Naumov et al., A.v.l., 2012
211	http://1002genomes.u-strasbg.fr/files/	NA	SJ5L16	AMROSW	Soil	Jhuosi, Hualein, Taiwan	2	WineEuropean	Naumov et al., A.v.l., 2012
212	http://1002genomes.u-strasbg.fr/files/	NA	SJ5L17	AMSOSW	Probiotic	Austria	2	WineEuropean	Peter and De Chiara et al., Nature, 2018
213	http://1002genomes.u-strasbg.fr/files/	NA	SJ5L18	AMTOSW	Probiotic	Austria	2	WineEuropean3	Peter and De Chiara et al., Nature, 2018
214	http://1002genomes.u-strasbg.fr/files/	NA	DBVPG6696	ANAOSW	Wine	Burundi	2	MosaicsR3	Peter and De Chiara et al., Nature, 2018
215	http://1002genomes.u-strasbg.fr/files/	NA	YPS129	ANCOSW	Tree	Pennsylvania, USA	2	NorthAmerican	Sniegowski et al., FEMS YR, 2002
216	http://1002genomes.u-strasbg.fr/files/	NA	YPS133	ANDOSW	Soil	Pennsylvania, USA	2	NorthAmerican	Sniegowski et al., FEMS YR, 2002
217	http://1002genomes.u-strasbg.fr/files/	NA	YPS134	ANEOSW	Soil	Pennsylvania, USA	2	NorthAmerican	Sniegowski et al., FEMS YR, 2002
218	http://1002genomes.u-strasbg.fr/files/	NA	YPS139	ANFOSW	Soil	Pennsylvania, USA	2	NorthAmerican	Sniegowski et al., FEMS YR, 2002
219	http://1002genomes.u-strasbg.fr/files/	NA	YPS141	ANGOSW	Soil	Pennsylvania, USA	2	NorthAmerican	Sniegowski et al., FEMS YR, 2002
220	http://1002genomes.u-strasbg.fr/files/	NA	YPS142	ANHOSW	Nature	Pennsylvania, USA	2	NorthAmerican	Sniegowski et al., FEMS YR, 2002
221	http://1002genomes.u-strasbg.fr/files/	NA	YPS143	ANIOSW	Soil	Pennsylvania, USA	2	NorthAmerican	Sniegowski et al., FEMS YR, 2002
222	http://1002genomes.u-strasbg.fr/files/	NA	YPS154	ANKOSW	Tree	Pennsylvania, USA	2	NorthAmerican	Sniegowski et al., FEMS YR, 2002
223	http://1002genomes.u-strasbg.fr/files/	NA	A-6	ANLOSW	Beer	Ghana	4	AfricanBeer	Van der Aa Kühle et al., Yeast, 2001
224	http://1002genomes.u-strasbg.fr/files/	NA	A-18	ANMOSW	Beer	Ghana	4	AfricanBeer	Van der Aa Kühle et al., Yeast, 2001
225	http://1002genomes.u-strasbg.fr/files/	NA	AY529516	ANNOSW	Fermentation	Ghana	2		Jespersen et.al, JID, 2013
226	http://1002genomes.u-strasbg.fr/files/	NA	UWOPS83-883-2	ANPOSW	Insect	Navassa Island	2	MixOrigin	Peter and De Chiara et al., Nature, 2018
227	http://1002genomes.u-strasbg.fr/files/	NA	L-1191	ANQOSW	Wine	Valle de Ica, Peru	2	WineEuropean	Cubillos et al., FEMS ME, 2009
228	http://1002genomes.u-strasbg.fr/files/	NA	RIB0001	ANROSW	Sake	Japan	2	Sake-A	Peter and De Chiara et al., Nature, 2018
229	http://1002genomes.u-strasbg.fr/files/	NA	RIB0002	ANSOSW	Sake	Japan	2	Sake-A	Peter and De Chiara et al., Nature, 2018
230	http://1002genomes.u-strasbg.fr/files/	NA	RIB0003	ANTOSW	Sake	Japan	2	Sake-A	Peter and De Chiara et al., Nature, 2018
231	http://1002genomes.u-strasbg.fr/files/	NA	RIB0004	ANVOSW	Sake	Japan	2	Sake-A	Peter and De Chiara et al., Nature, 2018
232	http://1002genomes.u-strasbg.fr/files/	NA	RIB0005	APAOSW	Sake	Japan	2	Sake-A	Peter and De Chiara et al., Nature, 2018
233	http://1002genomes.u-strasbg.fr/files/	NA	RIB1001	APCOSW	Sake	Japan	2	Sake-B	Peter and De Chiara et al., Nature, 2018
234	http://1002genomes.u-strasbg.fr/files/	NA	RIB1002	APDOSW	Sake	Japan	2	Sake-B	Peter and De Chiara et al., Nature, 2018
235	http://1002genomes.u-strasbg.fr/files/	NA	RIB1003	APEOSW	Sake	Japan	2	Sake-B	Peter and De Chiara et al., Nature, 2018
236	http://1002genomes.u-strasbg.fr/files/	NA	RIB1004	APFOSW	Sake	Japan	2	Sake-B	Peter and De Chiara et al., Nature, 2018
237	http://1002genomes.u-strasbg.fr/files/	NA	VF8_(6)	APGOSW	Bioethanol	Araras, Sao Paulo, Brazil	1	Bioethanol	Antonangelo et al., Yeast, 2013
238	http://1002genomes.u-strasbg.fr/files/	NA	M1.1	APHOSW	Distillery	Pirassununga, Sao Paulo, Brazil	2	Bioethanol	Antonangelo et al., Yeast, 2013
239	http://1002genomes.u-strasbg.fr/files/	NA	YS20	APIOSW	Bakery	Korea	2	MixOrigin	Bell et al., LAM, 2001
240	http://1002genomes.u-strasbg.fr/files/	NA	YS10(E)	APKOSW	Bakery	South Africa	3	MixOrigin	Bell et al., LAM, 2001
241	http://1002genomes.u-strasbg.fr/files/	NA	YS11(E)	APLOSW	Bakery	Turkey	2	MixOrigin	Bell et al., LAM, 2001
242	http://1002genomes.u-strasbg.fr/files/	NA	YS15	APMOSW	Bakery	Korea	2	MixOrigin	Bell et al., LAM, 2001
243	http://1002genomes.u-strasbg.fr/files/	NA	YS19	APNOSW	Bakery	Philippines	3	MixOrigin	Bell et al., LAM, 2001
244	http://1002genomes.u-strasbg.fr/files/	NA	CBS382	APPOSW	Beer	Brazil, Rio de Janeiro	3	MosaicsBeer	Peter and De Chiara et al., Nature, 2018
245	http://1002genomes.u-strasbg.fr/files/	NA	CBS400	APQOSW	Palm wine	Ivory Coast	2	AfricanPalmWine	Peter and De Chiara et al., Nature, 2018
246	http://1002genomes.u-strasbg.fr/files/	NA	CBS403	APROSW	Beer	West Africa	2	AfricanPalmWine	Peter and De Chiara et al., Nature, 2018
247	http://1002genomes.u-strasbg.fr/files/	NA	CBS423	APSOSW	Wine	Switzerland	2	WineEuropean	Peter and De Chiara et al., Nature, 2018
248	http://1002genomes.u-strasbg.fr/files/	NA	CBS459	APTOSW	Wine	Italy	2	WineEuropean	Peter and De Chiara et al., Nature, 2018
249	http://1002genomes.u-strasbg.fr/files/	NA	CBS1250	APVOSW	Wine	Spain	2	WineEuropean	Peter and De Chiara et al., Nature, 2018
250	http://1002genomes.u-strasbg.fr/files/	NA	CBS4903	AQAOSW	Industrial	Spain	2	Alpechin	Peter and De Chiara et al., Nature, 2018
251	http://1002genomes.u-strasbg.fr/files/	NA	CBS5112	AQBOSW	Wine	Spain	2	WineEuropean	Peter and De Chiara et al., Nature, 2018
252	http://1002genomes.u-strasbg.fr/files/	NA	CBS5155	AQCOSW	Wine	South Armenia	2	WineEuropean4	Peter and De Chiara et al., Nature, 2018
253	http://1002genomes.u-strasbg.fr/files/	NA	CBS5378	AQDOSW	Industrial	Spain	2	Alpechin	Peter and De Chiara et al., Nature, 2018
254	http://1002genomes.u-strasbg.fr/files/	NA	CBS6006	AQEOSW	Wine	Spain	2	WineEuropean4	Peter and De Chiara et al., Nature, 2018
255	http://1002genomes.u-strasbg.fr/files/	NA	CBS7539	AQGOSW	Beer	Plovdiv, Bulgaria	2	MosaicsBeer	Peter and De Chiara et al., Nature, 2018
256	http://1002genomes.u-strasbg.fr/files/	NA	CBS7957	AQHOSW	Industrial	Sao Paulo, Brazil	3	MosaicsBeer	Peter and De Chiara et al., Nature, 2018
257	http://1002genomes.u-strasbg.fr/files/	NA	CBS8292	AQIOSW	Water	Sweden	2	MixOrigin	Peter and De Chiara et al., Nature, 2018
258	http://1002genomes.u-strasbg.fr/files/	NA	CBS420	AQMOSW	Dairy	Italy	2	DairyProducts	Peter and De Chiara et al., Nature, 2018
259	http://1002genomes.u-strasbg.fr/files/	NA	CBS435	AQNOSW	Sake	Japan	2	Sake-A	Peter and De Chiara et al., Nature, 2018
260	http://1002genomes.u-strasbg.fr/files/	NA	CBS462	AQPOSW	Wine	Spain	2	WineEuropean4	Peter and De Chiara et al., Nature, 2018
261	http://1002genomes.u-strasbg.fr/files/	NA	CBS1175	AQQOSW	Wine	Switzerland	2	WineEuropean	Peter and De Chiara et al., Nature, 2018
262	http://1002genomes.u-strasbg.fr/files/	NA	CBS1190	AQROSW	Wine	Germany	2	WineEuropean	Peter and De Chiara et al., Nature, 2018
263	http://1002genomes.u-strasbg.fr/files/	NA	CBS1196	AQSOSW	Distillery	Indonesia	2	AsianFermentation	Peter and De Chiara et al., Nature, 2018
264	http://1002genomes.u-strasbg.fr/files/	NA	CBS1230	AQTOSW	Beer	Belgium	3	Beer	Peter and De Chiara et al., Nature, 2018
265	http://1002genomes.u-strasbg.fr/files/	NA	CBS1239	ARAOSW	Distillery	NA	4	MosaicsR3	Peter and De Chiara et al., Nature, 2018
266	http://1002genomes.u-strasbg.fr/files/	NA	CBS1254	ARBOSW	Bakery	NA	4	MosaicsR3	Peter and De Chiara et al., Nature, 2018
267	http://1002genomes.u-strasbg.fr/files/	NA	CBS1257	ARCOSW	Wine	Germany	2	WineEuropean	Peter and De Chiara et al., Nature, 2018
268	http://1002genomes.u-strasbg.fr/files/	NA	CBS1398	AREOSW	Tree	NA	2	MosaicsBeer	Peter and De Chiara et al., Nature, 2018
269	http://1002genomes.u-strasbg.fr/files/	NA	CBS1576	ARGOSW	Tree	Celebes, Sulavesi, Indonesia	2	AsianIsland	Peter and De Chiara et al., Nature, 2018
270	http://1002genomes.u-strasbg.fr/files/	NA	CBS1592	ARHOSW	Fermentation	Java, Indonesia	2	AsianIsland	Peter and De Chiara et al., Nature, 2018
271	http://1002genomes.u-strasbg.fr/files/	NA	CBS1593	ARIOSW	Fermentation	Java, Indonesia	2	AsianIsland	Peter and De Chiara et al., Nature, 2018
272	http://1002genomes.u-strasbg.fr/files/	NA	CBS1602	ARKOSW	Fruit	NA	2	WineEuropean	Peter and De Chiara et al., Nature, 2018
273	http://1002genomes.u-strasbg.fr/files/	NA	CBS2087	ARLOSW	Flower	China	2	WineEuropean	Peter and De Chiara et al., Nature, 2018
274	http://1002genomes.u-strasbg.fr/files/	NA	CBS2188	ARMOSW	Fruit	Japan	2	Sake-A	Peter and De Chiara et al., Nature, 2018
275	http://1002genomes.u-strasbg.fr/files/	NA	CBS2246	ARNOSW	Human, clinical	Netherlands	3	DairyProducts	Peter and De Chiara et al., Nature, 2018
276	http://1002genomes.u-strasbg.fr/files/	NA	CBS2270	ARPOSW	Wine	Japan	2	Sake-A	Peter and De Chiara et al., Nature, 2018
277	http://1002genomes.u-strasbg.fr/files/	NA	CBS2271	ARQOSW	Wine	Belgium	2	WineEuropean	Peter and De Chiara et al., Nature, 2018
278	http://1002genomes.u-strasbg.fr/files/	NA	CBS2272	ARROSW	Dairy	Delft, Netherlands	2	DairyProducts	Peter and De Chiara et al., Nature, 2018
279	http://1002genomes.u-strasbg.fr/files/	NA	CBS2421	ARSOSW	Nature	NA	2	DairyProducts	Peter and De Chiara et al., Nature, 2018
280	http://1002genomes.u-strasbg.fr/files/	NA	CBS2808	ARTOSW	Wine	Slovakia	2	WineEuropean4	Peter and De Chiara et al., Nature, 2018
281	http://1002genomes.u-strasbg.fr/files/	NA	CBS2965	ARVOSW	Distillery	Denmark	2	WineEuropean	Peter and De Chiara et al., Nature, 2018
282	http://1002genomes.u-strasbg.fr/files/	NA	CBS4092	ASAOSW	Wine	Spain	3	WineEuropean4	Peter and De Chiara et al., Nature, 2018
283	http://1002genomes.u-strasbg.fr/files/	NA	CBS4255	ASBOSW	Human, clinical	NA	2	MosaicsBeer	Peter and De Chiara et al., Nature, 2018
284	http://1002genomes.u-strasbg.fr/files/	NA	CBS4455	ASCOSW	Beer	South Africa	3	AfricanBeer	Peter and De Chiara et al., Nature, 2018
285	http://1002genomes.u-strasbg.fr/files/	NA	CBS4507	ASDOSW	Beer	NA	2	WineEuropean	Peter and De Chiara et al., Nature, 2018
286	http://1002genomes.u-strasbg.fr/files/	NA	CBS4667	ASEOSW	Wine	Former Czechoslovakia	2	WineEuropean	Peter and De Chiara et al., Nature, 2018
287	http://1002genomes.u-strasbg.fr/files/	NA	CBS1489	ASGOSW	Human, clinical	Italy	2	WineEuropean	Peter and De Chiara et al., Nature, 2018
288	http://1002genomes.u-strasbg.fr/files/	NA	CLIB227	ASHOSW	Beer	Netherlands	4	Beer	Peter and De Chiara et al., Nature, 2018
289	http://1002genomes.u-strasbg.fr/files/	NA	CLIB340	ASLOSW	Bakery	Anatolia, Turkey	2	MixOrigin	Peter and De Chiara et al., Nature, 2018
290	http://1002genomes.u-strasbg.fr/files/	NA	CLIB409	ASMOSW	Nature	Vietnam	3	Other	Peter and De Chiara et al., Nature, 2018
291	http://1002genomes.u-strasbg.fr/files/	NA	CLIB630	ASNOSW	Dairy	Normandy, France	2	DairyProducts	Peter and De Chiara et al., Nature, 2018
292	http://1002genomes.u-strasbg.fr/files/	NA	B1	ASPOSW	Unknown	France	2	MixOrigin	Fay et al., Plos Gen, 2005
293	http://1002genomes.u-strasbg.fr/files/	NA	M1	ASROSW	Wine	Italy	2	WineEuropean	Fay et al., Plos Gen, 2005
294	http://1002genomes.u-strasbg.fr/files/	NA	M5	ASSOSW	Wine	Italy	2	WineEuropean	Fay et al., Plos Gen, 2005
295	http://1002genomes.u-strasbg.fr/files/	NA	M6	ASTOSW	Wine	Italy	2	MosaicsR1	Fay et al., Plos Gen, 2005
296	http://1002genomes.u-strasbg.fr/files/	NA	M9	ASVOSW	Wine	Italy	2	MosaicsR1	Fay et al., Plos Gen, 2005
297	http://1002genomes.u-strasbg.fr/files/	NA	PR	ATAOSW	Wine	France	2	WineEuropean	Fay et al., Plos Gen, 2005
298	http://1002genomes.u-strasbg.fr/files/	NA	Y1	ATBOSW	Nature	NA	3	MosaicsR3	Fay et al., Plos Gen, 2005
299	http://1002genomes.u-strasbg.fr/files/	NA	YJM308	ATCOSW	Human, clinical	NA	2	MosaicsR3	Fay et al., Plos Gen, 2005
300	http://1002genomes.u-strasbg.fr/files/	NA	YJM339	ATDOSW	Human, clinical	NA	2	MosaicsR3	Fay et al., Plos Gen, 2005
301	http://1002genomes.u-strasbg.fr/files/	NA	YJM627	ATEOSW	Unknown	France	2	MosaicsR3	Fay et al., Plos Gen, 2005
302	http://1002genomes.u-strasbg.fr/files/	NA	UC4	ATHOSW	Wine	Germany	2	WineEuropean	Fay et al., Plos Gen, 2005
303	http://1002genomes.u-strasbg.fr/files/	NA	UC10	ATMOSW	Wine	California, USA	2	WineEuropean	Fay et al., Plos Gen, 2005
304	http://1002genomes.u-strasbg.fr/files/	NA	Y4	ATNOSW	Fruit	Indonesia	2	WineEuropean	Fay et al., Plos Gen, 2005
305	http://1002genomes.u-strasbg.fr/files/	NA	Y5	ATPOSW	Palm wine	West Africa	2	AfricanPalmWine	Peter and De Chiara et al., Nature, 2018
306	http://1002genomes.u-strasbg.fr/files/	NA	CECT10497	ATQOSW	Industrial	Spain	2	Alpechin	Peter and De Chiara et al., Nature, 2018
307	http://1002genomes.u-strasbg.fr/files/	NA	CECT10120	ATROSW	Fruit	Spain	2	MixOrigin	Peter and De Chiara et al., Nature, 2018
308	http://1002genomes.u-strasbg.fr/files/	NA	CECT10131	ATSOSW	Flower	Spain	2	MixOrigin	Peter and De Chiara et al., Nature, 2018
309	http://1002genomes.u-strasbg.fr/files/	NA	CECT1462	ATVOSW	Beer	UK	4	Beer	Peter and De Chiara et al., Nature, 2018
310	http://1002genomes.u-strasbg.fr/files/	NA	CECT10266	AVBOSW	Industrial	Spain	1	Alpechin	Peter and De Chiara et al., Nature, 2018
311	http://1002genomes.u-strasbg.fr/files/	NA	CECT10711	AVCOSW	Sake	Japan	2	Sake-B	Peter and De Chiara et al., Nature, 2018
312	http://1002genomes.u-strasbg.fr/files/	NA	CECT10712	AVDOSW	Sake	Japan	2	Sake-B	Peter and De Chiara et al., Nature, 2018
313	http://1002genomes.u-strasbg.fr/files/	NA	CECT1478	AVHOSW	Wine	Hungary	2	WineEuropean	Peter and De Chiara et al., Nature, 2018
314	http://1002genomes.u-strasbg.fr/files/	NA	YPS163	AVIOSW	Soil	Pennsylvanian	2	NorthAmerican	Sniegowski et al., FEMS YR, 2002
315	http://1002genomes.u-strasbg.fr/files/	NA	L-1194	AVKOSW	Wine	Valle de Ica, Peru	2	WineEuropean	Cubillos et al., FEMS ME, 2009
316	http://1002genomes.u-strasbg.fr/files/	NA	RIB6008	AVLOSW	Sake	Japan	2	Sake-B	Peter and De Chiara et al., Nature, 2018
317	http://1002genomes.u-strasbg.fr/files/	NA	RIB6009	AVMOSW	Sake	Japan	2	Sake-B	Peter and De Chiara et al., Nature, 2018
318	http://1002genomes.u-strasbg.fr/files/	NA	CH02	AVNOSW	Beer	Abengourou, Ivory Coast	4	AfricanBeer	Al Safadi et al., FEMS Yeast Res, 2010
319	http://1002genomes.u-strasbg.fr/files/	NA	CH06	AVPOSW	Beer	Abengourou, Ivory Coast	5	AfricanBeer	Al Safadi et al., FEMS Yeast Res, 2010
320	http://1002genomes.u-strasbg.fr/files/	NA	CH10	AVQOSW	Beer	Abengourou, Ivory Coast	5	AfricanBeer	Al Safadi et al., FEMS Yeast Res, 2010
321	http://1002genomes.u-strasbg.fr/files/	NA	CH11	AVROSW	Beer	Abengourou, Ivory Coast	5	AfricanBeer	Al Safadi et al., FEMS Yeast Res, 2010
322	http://1002genomes.u-strasbg.fr/files/	NA	CH14	AVSOSW	Beer	Abengourou, Ivory Coast	5	AfricanBeer	Al Safadi et al., FEMS Yeast Res, 2010
323	http://1002genomes.u-strasbg.fr/files/	NA	CH13	AVTOSW	Beer	Abengourou, Ivory Coast	5	AfricanBeer	Al Safadi et al., FEMS Yeast Res, 2010
324	http://1002genomes.u-strasbg.fr/files/	NA	DJ65	AVVOSW	Palm wine	Yoboki, Djibouti	3	AfricanPalmWine	Tapsoba et al., IJFM, 2015
325	http://1002genomes.u-strasbg.fr/files/	NA	DJ66	BAAOSW	Palm wine	Yoboki, Djibouti	3	AfricanPalmWine	Tapsoba et al., IJFM, 2015
326	http://1002genomes.u-strasbg.fr/files/	NA	DJ68	BABOSW	Palm wine	Yoboki, Djibouti	3	AfricanPalmWine	Tapsoba et al., IJFM, 2015
327	http://1002genomes.u-strasbg.fr/files/	NA	DJ70	BACOSW	Palm wine	Yoboki, Djibouti	3	AfricanPalmWine	Tapsoba et al., IJFM, 2015
328	http://1002genomes.u-strasbg.fr/files/	NA	DJ71	BADOSW	Palm wine	Yoboki, Djibouti	3	AfricanPalmWine	Tapsoba et al., IJFM, 2015
329	http://1002genomes.u-strasbg.fr/files/	NA	DJ73	BAEOSW	Palm wine	Yoboki, Djibouti	3	AfricanPalmWine	Tapsoba et al., IJFM, 2015
330	http://1002genomes.u-strasbg.fr/files/	NA	DJ74	BAFOSW	Palm wine	Yoboki, Djibouti	2	AfricanPalmWine	Tapsoba et al., IJFM, 2015
331	http://1002genomes.u-strasbg.fr/files/	NA	SX1	BAGOSW	Tree	Qinling Mountain, Shaanxi province, China	2	CHN-II	Wang et al., ME, 2012
332	http://1002genomes.u-strasbg.fr/files/	NA	SX3	BAHOSW	Tree	Qinling Mountain, Shaanxi province, China	2	CHN-II	Wang et al., ME, 2012
333	http://1002genomes.u-strasbg.fr/files/	NA	BJ6	BAIOSW	Fruit	Changping, Beijing, China	2	CHN-IV	Wang et al., ME, 2012
334	http://1002genomes.u-strasbg.fr/files/	NA	BJ20	BAKOSW	Tree	Dongling Mountain, Beijing, China	2	CHN-IV	Wang et al., ME, 2012
335	http://1002genomes.u-strasbg.fr/files/	NA	HN6	BALOSW	Nature	Bawangling Mountain, Hainan province, China	2	CHN-I	Wang et al., ME, 2012
336	http://1002genomes.u-strasbg.fr/files/	NA	HN10	BAMOSW	Nature	Wuzhi Mountain, Hainan province, China	2	CHN-III	Wang et al., ME, 2012
337	http://1002genomes.u-strasbg.fr/files/	NA	HN15	BANOSW	Nature	Wuzhi Mountain, Hainan province, China	2	CHN-V	Wang et al., ME, 2012
338	http://1002genomes.u-strasbg.fr/files/	NA	HN16	BAPOSW	Soil	Wuzhi Mountain, Hainan province, China	2	CHN-V	Wang et al., ME, 2012
339	http://1002genomes.u-strasbg.fr/files/	NA	HN19	BAQOSW	Tree	Wuzhi Mountain, Hainan province, China	2	CHN-III	Wang et al., ME, 2012
340	http://1002genomes.u-strasbg.fr/files/	NA	PB56	BAROSW	Tree	Montalcino in Italy	2	WineEuropean	Peter and De Chiara et al., Nature, 2018
341	http://1002genomes.u-strasbg.fr/files/	NA	PB67	BASOSW	Soil	Montalcino in Italy	2	WineEuropean	Peter and De Chiara et al., Nature, 2018
342	http://1002genomes.u-strasbg.fr/files/	NA	PB94	BATOSW	Soil	Montalcino in Italy	2	WineEuropean	Peter and De Chiara et al., Nature, 2018
343	http://1002genomes.u-strasbg.fr/files/	NA	PB137	BAVOSW	Wine	Montalcino in Italy	2	WineEuropean	Peter and De Chiara et al., Nature, 2018
344	http://1002genomes.u-strasbg.fr/files/	NA	PB197	BBAOSW	Soil	Montalcino in Italy	2	WineEuropean	Peter and De Chiara et al., Nature, 2018
345	http://1002genomes.u-strasbg.fr/files/	NA	PB200	BBBOSW	Soil	Montalcino in Italy	2	WineEuropean	Peter and De Chiara et al., Nature, 2018
346	http://1002genomes.u-strasbg.fr/files/	NA	CCY_21-4-88	BBCOSW	Fruit	Laksarska Nova Ves, Slovakia	3	MixOrigin	Peter and De Chiara et al., Nature, 2018
347	http://1002genomes.u-strasbg.fr/files/	NA	CCY_21-4-97	BBDOSW	Water	Jakubov, Slovakia	2	MixOrigin	Peter and De Chiara et al., Nature, 2018
348	http://1002genomes.u-strasbg.fr/files/	NA	CCY_21-4-98	BBEOSW	Water	Jakubov, Slovakia	2	MixOrigin	Peter and De Chiara et al., Nature, 2018
349	http://1002genomes.u-strasbg.fr/files/	NA	CCY_21-4-102	BBFOSW	Water	Bratislava, Slovakia	2	MixOrigin	Peter and De Chiara et al., Nature, 2018
350	http://1002genomes.u-strasbg.fr/files/	NA	CCY_21-4-106	BBGOSW	Water	Devinska Nova Ves, Slovakia	4	Beer	Peter and De Chiara et al., Nature, 2018
351	http://1002genomes.u-strasbg.fr/files/	NA	CCY_21-4-119	BBHOSW	Flower	Male Levare, Slovakia	2	WineEuropean1	Peter and De Chiara et al., Nature, 2018
352	http://1002genomes.u-strasbg.fr/files/	NA	CCY_21-4-120	BBIOSW	Flower	Male Levare, Slovakia	2	WineEuropean1	Peter and De Chiara et al., Nature, 2018
353	http://1002genomes.u-strasbg.fr/files/	NA	CCY_21-4-121	BBKOSW	Flower	Male Zaluzie, Slovakia	2	WineEuropean1	Peter and De Chiara et al., Nature, 2018
354	http://1002genomes.u-strasbg.fr/files/	NA	IMB-53	BBLOSW	Insect	Platanus orientalis forest, in Belasista Mountain, near Kamena Village in Bulgaria	2	MosaicsR3	Peter and De Chiara et al., Nature, 2018
355	http://1002genomes.u-strasbg.fr/files/	NA	908	BBMOSW	Distillery	Jalisco, Mexico	2	SouthAmericaMix2	Peter and De Chiara et al., Nature, 2018
356	http://1002genomes.u-strasbg.fr/files/	NA	1663	BBPOSW	Flower	Spain	2	MixOrigin	Peter and De Chiara et al., Nature, 2018
357	http://1002genomes.u-strasbg.fr/files/	NA	2162	BBQOSW	Soil	Hungary	2	MedOak	Peter and De Chiara et al., Nature, 2018
358	http://1002genomes.u-strasbg.fr/files/	NA	2163	BBROSW	Tree	Castellon, Spain	2	Other	Peter and De Chiara et al., Nature, 2018
359	http://1002genomes.u-strasbg.fr/files/	NA	2187	BBSOSW	Soil	Hungary	2	MedOak	Peter and De Chiara et al., Nature, 2018
360	http://1002genomes.u-strasbg.fr/files/	NA	2281	BBTOSW	Wine	Valdevimbre, Spain	3	MosaicsR3	Peter and De Chiara et al., Nature, 2018
361	http://1002genomes.u-strasbg.fr/files/	NA	2282	BBVOSW	Wine	Tuejar, Spain	2	WineEuropean	Peter and De Chiara et al., Nature, 2018
362	http://1002genomes.u-strasbg.fr/files/	NA	2644	BCAOSW	Human, clinical	Hospital Vall d'Hebron, Barcelona, Spain	2	WineEuropean3	Peter and De Chiara et al., Nature, 2018
363	http://1002genomes.u-strasbg.fr/files/	NA	HE001	BCBOSW	Human	French Guiana	2	FrenchGuiana	Angebault et al., JID, 2013
364	http://1002genomes.u-strasbg.fr/files/	NA	HE004	BCCOSW	Human	French Guiana	2	FrenchGuiana	Angebault et al., JID, 2013
365	http://1002genomes.u-strasbg.fr/files/	NA	HE005	BCDOSW	Human	French Guiana	2	FrenchGuiana	Angebault et al., JID, 2013
366	http://1002genomes.u-strasbg.fr/files/	NA	HE006	BCEOSW	Human	French Guiana	2	FrenchGuiana	Angebault et al., JID, 2013
367	http://1002genomes.u-strasbg.fr/files/	NA	HE007	BCFOSW	Human	French Guiana	2	FrenchGuiana	Angebault et al., JID, 2013
368	http://1002genomes.u-strasbg.fr/files/	NA	HE008	BCGOSW	Human	French Guiana	2	FrenchGuiana	Angebault et al., JID, 2013
369	http://1002genomes.u-strasbg.fr/files/	NA	HE009	BCHOSW	Human	French Guiana	2	FrenchGuiana	Angebault et al., JID, 2013
370	http://1002genomes.u-strasbg.fr/files/	NA	HE010	BCIOSW	Human	French Guiana	2	FrenchGuiana	Angebault et al., JID, 2013
371	http://1002genomes.u-strasbg.fr/files/	NA	HE011	BCKOSW	Human	French Guiana	2	FrenchGuiana	Angebault et al., JID, 2013
372	http://1002genomes.u-strasbg.fr/files/	NA	HE012	BCLOSW	Human	French Guiana	2	FrenchGuiana	Angebault et al., JID, 2013
373	http://1002genomes.u-strasbg.fr/files/	NA	HE013	BCMOSW	Human	French Guiana	2	FrenchGuiana	Angebault et al., JID, 2013
374	http://1002genomes.u-strasbg.fr/files/	NA	HE015	BCNOSW	Human	French Guiana	1	FrenchGuiana	Angebault et al., JID, 2013
375	http://1002genomes.u-strasbg.fr/files/	NA	HE016	BCPOSW	Human	French Guiana	2	FrenchGuiana	Angebault et al., JID, 2013
376	http://1002genomes.u-strasbg.fr/files/	NA	HE020	BCQOSW	Human	French Guiana	2	FrenchGuiana	Angebault et al., JID, 2013
377	http://1002genomes.u-strasbg.fr/files/	NA	#23	BCROSW	Nature	Israel	4	MixOrigin	Ezov et al., Genetics, 2006
378	http://1002genomes.u-strasbg.fr/files/	NA	#03	BCSOSW	Nature	Israel	2	MixOrigin	Ezov et al., Genetics, 2006
379	http://1002genomes.u-strasbg.fr/files/	NA	#05	BCTOSW	Nature	Israel	2	MixOrigin	Ezov et al., Genetics, 2006
380	http://1002genomes.u-strasbg.fr/files/	NA	#33	BCVOSW	Nature	Israel	2	MosaicsR2	Ezov et al., Genetics, 2006
381	http://1002genomes.u-strasbg.fr/files/	NA	#34	BDAOSW	Nature	Israel	2	MosaicsR2	Ezov et al., Genetics, 2006
382	http://1002genomes.u-strasbg.fr/files/	NA	#35	BDBOSW	Nature	Israel	2	MosaicsR2	Ezov et al., Genetics, 2006
383	http://1002genomes.u-strasbg.fr/files/	NA	#36	BDCOSW	Nature	Israel	2	MosaicsR3	Ezov et al., Genetics, 2006
384	http://1002genomes.u-strasbg.fr/files/	NA	#13	BDDOSW	Nature	Israel	2	MosaicsR2	Ezov et al., Genetics, 2006
385	http://1002genomes.u-strasbg.fr/files/	NA	#14	BDEOSW	Nature	Israel	3	MosaicsR2	Ezov et al., Genetics, 2006
386	http://1002genomes.u-strasbg.fr/files/	NA	#57	BDFOSW	Nature	Israel	2	MosaicsR3	Ezov et al., Genetics, 2006
387	http://1002genomes.u-strasbg.fr/files/	NA	#58	BDGOSW	Nature	Israel	2	MosaicsR3	Ezov et al., Genetics, 2006
388	http://1002genomes.u-strasbg.fr/files/	NA	#59	BDHOSW	Nature	Israel	2	MosaicsR2	Ezov et al., Genetics, 2006
389	http://1002genomes.u-strasbg.fr/files/	NA	#60	BDIOSW	Nature	Israel	2	MosaicsR2	Ezov et al., Genetics, 2006
390	http://1002genomes.u-strasbg.fr/files/	NA	#63	BDKOSW	Nature	Israel	2	MosaicsR2	Ezov et al., Genetics, 2006
391	http://1002genomes.u-strasbg.fr/files/	NA	CLQCA_10-386	BDLOSW	Beer	Equador	2	MixOrigin	Peter and De Chiara et al., Nature, 2018
392	http://1002genomes.u-strasbg.fr/files/	NA	MAJ_A	BDMOSW	Nature	Majunga, Madagascar	2	MosaicsR3	Peter and De Chiara et al., Nature, 2018
393	http://1002genomes.u-strasbg.fr/files/	NA	MAJ_G	BDNOSW	Nature	Majunga, Madagascar	2	AfricanBeer	Peter and De Chiara et al., Nature, 2018
394	http://1002genomes.u-strasbg.fr/files/	NA	CEY615	BDPOSW	Human	French Guiana	2	FrenchGuiana	Angebault et al., JID, 2013
395	http://1002genomes.u-strasbg.fr/files/	NA	CEY616	BDQOSW	Human	French Guiana	2	FrenchGuiana	Angebault et al., JID, 2013
396	http://1002genomes.u-strasbg.fr/files/	NA	CEY617	BDROSW	Human	French Guiana	2	FrenchGuiana	Angebault et al., JID, 2013
397	http://1002genomes.u-strasbg.fr/files/	NA	CEY618	BDSOSW	Human	French Guiana	2	FrenchGuiana	Angebault et al., JID, 2013
398	http://1002genomes.u-strasbg.fr/files/	NA	CEY619	BDTOSW	Human	French Guiana	2	FrenchGuiana	Angebault et al., JID, 2013
399	http://1002genomes.u-strasbg.fr/files/	NA	CEY620	BDVOSW	Human	French Guiana	2	FrenchGuiana	Angebault et al., JID, 2013
400	http://1002genomes.u-strasbg.fr/files/	NA	CEY621	BEAOSW	Human	French Guiana	2	FrenchGuiana	Angebault et al., JID, 2013
401	http://1002genomes.u-strasbg.fr/files/	NA	CEY622	BEBOSW	Human	French Guiana	2	FrenchGuiana	Angebault et al., JID, 2013
402	http://1002genomes.u-strasbg.fr/files/	NA	CEY623	BECOSW	Human	French Guiana	2	FrenchGuiana	Angebault et al., JID, 2013
403	http://1002genomes.u-strasbg.fr/files/	NA	CEY624	BEDOSW	Human	French Guiana	2	FrenchGuiana	Angebault et al., JID, 2013
404	http://1002genomes.u-strasbg.fr/files/	NA	CEY625	BEEOSW	Human	French Guiana	2	FrenchGuiana	Angebault et al., JID, 2013
405	http://1002genomes.u-strasbg.fr/files/	NA	CLIB413	BEFOSW	Fermentation	China	2	AsianFermentation	Peter and De Chiara et al., Nature, 2018
406	http://1002genomes.u-strasbg.fr/files/	NA	CLIB414	BEGOSW	Industrial	Japan	2	Other	Peter and De Chiara et al., Nature, 2018
407	http://1002genomes.u-strasbg.fr/files/	NA	CLIB415	BEHOSW	Fermentation	Taiwan	2	AsianFermentation	Peter and De Chiara et al., Nature, 2018
408	http://1002genomes.u-strasbg.fr/files/	NA	CLIB650	BEIOSW	Beer	Chad	3	AfricanBeer	Peter and De Chiara et al., Nature, 2018
409	http://1002genomes.u-strasbg.fr/files/	NA	CLIB651	BEKOSW	Beer	Chad	4	AfricanBeer	Peter and De Chiara et al., Nature, 2018
410	http://1002genomes.u-strasbg.fr/files/	NA	CLIB653	BEMOSW	Beer	Chad	4	AfricanBeer	Peter and De Chiara et al., Nature, 2018
411	http://1002genomes.u-strasbg.fr/files/	NA	CLIB654	BENOSW	Beer	Chad	3	AfricanBeer	Peter and De Chiara et al., Nature, 2018
412	http://1002genomes.u-strasbg.fr/files/	NA	EXF-3387	BEPOSW	Unknown	Ljubljana, Slovenia	2	WineEuropean1	Peter and De Chiara et al., Nature, 2018
413	http://1002genomes.u-strasbg.fr/files/	NA	EXF-4126	BEQOSW	Wine	Ljubljana, Slovenia	2	WineEuropean	Peter and De Chiara et al., Nature, 2018
414	http://1002genomes.u-strasbg.fr/files/	NA	EXF-5042	BEROSW	Wine	Slovenia	2	WineEuropean	Peter and De Chiara et al., Nature, 2018
415	http://1002genomes.u-strasbg.fr/files/	NA	EXF-5046	BESOSW	Wine	Slovenia	2	WineEuropean	Peter and De Chiara et al., Nature, 2018
416	http://1002genomes.u-strasbg.fr/files/	NA	EXF-5247	BETOSW	Water	Koper, Slovenia	2	WineEuropean	Peter and De Chiara et al., Nature, 2018
417	http://1002genomes.u-strasbg.fr/files/	NA	EXF-5248	BEVOSW	Water	Koper, Slovenia	2	WineEuropean	Peter and De Chiara et al., Nature, 2018
418	http://1002genomes.u-strasbg.fr/files/	NA	EXF-5284	BFAOSW	Soil	Slovenia	2	MosaicsR3	Peter and De Chiara et al., Nature, 2018
419	http://1002genomes.u-strasbg.fr/files/	NA	EXF-5287	BFBOSW	Nature	Slovenia	2	WineEuropean1	Peter and De Chiara et al., Nature, 2018
420	http://1002genomes.u-strasbg.fr/files/	NA	EXF-5295	BFCOSW	Fermentation	Slovenia	2	WineEuropean	Peter and De Chiara et al., Nature, 2018
421	http://1002genomes.u-strasbg.fr/files/	NA	EXF-5297	BFDOSW	Fruit	Slovenia	2	WineEuropean1	Peter and De Chiara et al., Nature, 2018
422	http://1002genomes.u-strasbg.fr/files/	NA	EXF-5734	BFEOSW	Industrial	NA	4	MixOrigin	Peter and De Chiara et al., Nature, 2018
423	http://1002genomes.u-strasbg.fr/files/	NA	EXF-5869	BFGOSW	Nature	NA	4	MixOrigin	Peter and De Chiara et al., Nature, 2018
424	http://1002genomes.u-strasbg.fr/files/	NA	EXF-5871	BFHOSW	Dairy	Slovenia	2	DairyProducts	Peter and De Chiara et al., Nature, 2018
425	http://1002genomes.u-strasbg.fr/files/	NA	EXF-6761	BFKOSW	Tree	Slovenia	2	WineEuropean	Peter and De Chiara et al., Nature, 2018
426	http://1002genomes.u-strasbg.fr/files/	NA	EXF-6780	BFLOSW	Tree	Slovenia	2	MosaicsR3	Peter and De Chiara et al., Nature, 2018
427	http://1002genomes.u-strasbg.fr/files/	NA	EXF-6835	BFMOSW	Industrial	Slovenia	4	MixOrigin	Peter and De Chiara et al., Nature, 2018
428	http://1002genomes.u-strasbg.fr/files/	NA	EXF-7145	BFNOSW	Tree	Serbia	2	DairyProducts	Peter and De Chiara et al., Nature, 2018
429	http://1002genomes.u-strasbg.fr/files/	NA	EXF-7197	BFPOSW	Tree	Montenegro	2	MedOak	Peter and De Chiara et al., Nature, 2018
430	http://1002genomes.u-strasbg.fr/files/	NA	CLIB484	BFQOSW	Cider	Brittany, France	2	WineEuropean	Peter and De Chiara et al., Nature, 2018
431	http://1002genomes.u-strasbg.fr/files/	NA	CLIB485	BFROSW	Cider	Brittany, France	2	WineEuropean	Peter and De Chiara et al., Nature, 2018
432	http://1002genomes.u-strasbg.fr/files/	NA	CLIB546	BFSOSW	Dairy	Normandy, France	2	DairyProducts	Peter and De Chiara et al., Nature, 2018
433	http://1002genomes.u-strasbg.fr/files/	NA	CLIB547	BFTOSW	Dairy	Normandy, France	2	DairyProducts	Peter and De Chiara et al., Nature, 2018
434	http://1002genomes.u-strasbg.fr/files/	NA	CLIB548	BFVOSW	Dairy	Normandy, France	2	DairyProducts	Peter and De Chiara et al., Nature, 2018
435	http://1002genomes.u-strasbg.fr/files/	NA	CLIB549	BGAOSW	Dairy	Normandy, France	2	DairyProducts	Peter and De Chiara et al., Nature, 2018
436	http://1002genomes.u-strasbg.fr/files/	NA	CLIB550	BGBOSW	Dairy	Normandy, France	2	DairyProducts	Peter and De Chiara et al., Nature, 2018
437	http://1002genomes.u-strasbg.fr/files/	NA	CLIB551	BGCOSW	Dairy	Normandy, France	2	DairyProducts	Peter and De Chiara et al., Nature, 2018
438	http://1002genomes.u-strasbg.fr/files/	NA	CLIB552	BGDOSW	Dairy	Normandy, France	2	DairyProducts	Peter and De Chiara et al., Nature, 2018
439	http://1002genomes.u-strasbg.fr/files/	NA	CLIB553	BGEOSW	Dairy	Normandy, France	2	DairyProducts	Peter and De Chiara et al., Nature, 2018
440	http://1002genomes.u-strasbg.fr/files/	NA	CLIB554	BGFOSW	Dairy	France	2	DairyProducts	Peter and De Chiara et al., Nature, 2018
441	http://1002genomes.u-strasbg.fr/files/	NA	CLIB555	BGGOSW	Dairy	France	2	DairyProducts	Peter and De Chiara et al., Nature, 2018
442	http://1002genomes.u-strasbg.fr/files/	NA	CLIB556	BGHOSW	Dairy	Poitou-Charentes, France	2	DairyProducts	Peter and De Chiara et al., Nature, 2018
443	http://1002genomes.u-strasbg.fr/files/	NA	CLIB557	BGIOSW	Dairy	Normandy, France	2	DairyProducts	Peter and De Chiara et al., Nature, 2018
444	http://1002genomes.u-strasbg.fr/files/	NA	CLIB558	BGKOSW	Dairy	Normandy, France	2	DairyProducts	Peter and De Chiara et al., Nature, 2018
445	http://1002genomes.u-strasbg.fr/files/	NA	CLIB559	BGLOSW	Dairy	Normandy, France	2	DairyProducts	Peter and De Chiara et al., Nature, 2018
446	http://1002genomes.u-strasbg.fr/files/	NA	CLIB560	BGMOSW	Dairy	Normandy, France	2	DairyProducts	Peter and De Chiara et al., Nature, 2018
447	http://1002genomes.u-strasbg.fr/files/	NA	CLIB561	BGNOSW	Dairy	Normandy, France	2	DairyProducts	Peter and De Chiara et al., Nature, 2018
448	http://1002genomes.u-strasbg.fr/files/	NA	CLIB562	BGPOSW	Dairy	Normandy, France	2	DairyProducts	Peter and De Chiara et al., Nature, 2018
449	http://1002genomes.u-strasbg.fr/files/	NA	CLIB563	BGQOSW	Dairy	Normandy, France	2	DairyProducts	Peter and De Chiara et al., Nature, 2018
450	http://1002genomes.u-strasbg.fr/files/	NA	CLIB564	BGROSW	Dairy	Normandy, France	2	DairyProducts	Peter and De Chiara et al., Nature, 2018
451	http://1002genomes.u-strasbg.fr/files/	NA	CLIB631	BGSOSW	Dairy	Normandy, France	2	DairyProducts	Peter and De Chiara et al., Nature, 2018
452	http://1002genomes.u-strasbg.fr/files/	NA	CLIB648	BGTOSW	Dairy	Alpes, France	2	DairyProducts	Peter and De Chiara et al., Nature, 2018
453	http://1002genomes.u-strasbg.fr/files/	NA	CLIB649	BGVOSW	Dairy	Alpes, France	2	DairyProducts	Peter and De Chiara et al., Nature, 2018
454	http://1002genomes.u-strasbg.fr/files/	NA	CLIB655	BHAOSW	Beer	Chad	3	AfricanBeer	Peter and De Chiara et al., Nature, 2018
455	http://1002genomes.u-strasbg.fr/files/	NA	CLIB889	BHBOSW	Bakery	Australia	2	WineEuropean	Peter and De Chiara et al., Nature, 2018
456	http://1002genomes.u-strasbg.fr/files/	NA	CLIB1040	BHCOSW	Cider	Brittany, France	2	WineEuropean	Peter and De Chiara et al., Nature, 2018
457	http://1002genomes.u-strasbg.fr/files/	NA	CLIB1059	BHDOSW	Cider	Brittany, France	2	MosaicsR1	Peter and De Chiara et al., Nature, 2018
458	http://1002genomes.u-strasbg.fr/files/	NA	CLIB1060	BHEOSW	Cider	Brittany, France	2	MosaicsR1	Peter and De Chiara et al., Nature, 2018
459	http://1002genomes.u-strasbg.fr/files/	NA	CLIB1062	BHFOSW	Cider	Brittany, France	2	WineEuropean	Peter and De Chiara et al., Nature, 2018
460	http://1002genomes.u-strasbg.fr/files/	NA	CLIB1070	BHGOSW	Cider	Lower Normandy, France	2	MosaicsR2	Peter and De Chiara et al., Nature, 2018
461	http://1002genomes.u-strasbg.fr/files/	NA	CLIB1071	BHHOSW	Cider	Lower Normandy, France	2	MosaicsR2	Peter and De Chiara et al., Nature, 2018
462	http://1002genomes.u-strasbg.fr/files/	NA	CLIB1072	BHIOSW	Cider	Lower Normandy, France	2	MosaicsR2	Peter and De Chiara et al., Nature, 2018
463	http://1002genomes.u-strasbg.fr/files/	NA	CLIB1077	BHKOSW	Cider	Upper Normandy, France	2	MosaicsR1	Peter and De Chiara et al., Nature, 2018
464	http://1002genomes.u-strasbg.fr/files/	NA	CLIB1082	BHLOSW	Cider	Upper Normandy, France	2	MosaicsR1	Peter and De Chiara et al., Nature, 2018
465	http://1002genomes.u-strasbg.fr/files/	NA	CLIB1085	BHMOSW	Cider	Upper Normandy, France	2	MosaicsR1	Peter and De Chiara et al., Nature, 2018
466	http://1002genomes.u-strasbg.fr/files/	NA	CLIB1410	BHNOSW	Fermentation	Laos	2	WineEuropean	Peter and De Chiara et al., Nature, 2018
467	http://1002genomes.u-strasbg.fr/files/	NA	CLIB1411	BHPOSW	Fermentation	Laos	2	AsianFermentation	Peter and De Chiara et al., Nature, 2018
468	http://1002genomes.u-strasbg.fr/files/	NA	CLIB1412	BHQOSW	Fermentation	Laos	2	AsianFermentation	Peter and De Chiara et al., Nature, 2018
469	http://1002genomes.u-strasbg.fr/files/	NA	CLIB1413	BHROSW	Fermentation	Laos	2	AsianFermentation	Peter and De Chiara et al., Nature, 2018
470	http://1002genomes.u-strasbg.fr/files/	NA	CLIB1414	BHSOSW	Fermentation	Laos	2	AsianFermentation	Peter and De Chiara et al., Nature, 2018
471	http://1002genomes.u-strasbg.fr/files/	NA	CLIB1083	BHTOSW	Cider	Upper Normandy, France	2	MosaicsR1	Peter and De Chiara et al., Nature, 2018
472	http://1002genomes.u-strasbg.fr/files/	NA	DBVPG1014	BHVOSW	Wine	Umbria, Italy	2	WineEuropean	Peter and De Chiara et al., Nature, 2018
473	http://1002genomes.u-strasbg.fr/files/	NA	DBVPG1029	BIAOSW	Wine	Colli di Roma, Lazio, Italy	2	WineEuropean	Peter and De Chiara et al., Nature, 2018
474	http://1002genomes.u-strasbg.fr/files/	NA	DBVPG1041	BIBOSW	Wine	Tuscany, Italy	2	WineEuropean	Peter and De Chiara et al., Nature, 2018
475	http://1002genomes.u-strasbg.fr/files/	NA	DBVPG1056	BICOSW	Wine	production zone of Chianti wine, Italy	2	WineEuropean	Peter and De Chiara et al., Nature, 2018
476	http://1002genomes.u-strasbg.fr/files/	NA	DBVPG1058	BIDOSW	Bakery	Pazzaglia, Italy	2	WineEuropean	Peter and De Chiara et al., Nature, 2018
477	http://1002genomes.u-strasbg.fr/files/	NA	DBVPG1074	BIEOSW	Wine	San Severo, Puglia, Italy	2	MosaicsR3	Peter and De Chiara et al., Nature, 2018
478	http://1002genomes.u-strasbg.fr/files/	NA	DBVPG1076	BIFOSW	Wine	Locorotondo, Puglia, Italy	2	WineEuropean	Peter and De Chiara et al., Nature, 2018
479	http://1002genomes.u-strasbg.fr/files/	NA	DBVPG1080	BIGOSW	Wine	Barletta, Italy	2	WineEuropean	Peter and De Chiara et al., Nature, 2018
480	http://1002genomes.u-strasbg.fr/files/	NA	DBVPG1105	BIHOSW	Wine	Adelaide, Australia	2	WineEuropean	Peter and De Chiara et al., Nature, 2018
481	http://1002genomes.u-strasbg.fr/files/	NA	DBVPG1106	BIIOSW	Wine	Australia	2	WineEuropean	Peter and De Chiara et al., Nature, 2018
482	http://1002genomes.u-strasbg.fr/files/	NA	DBVPG1107	BIKOSW	Wine	McLaren Valley, Australia	2	WineEuropean	Peter and De Chiara et al., Nature, 2018
483	http://1002genomes.u-strasbg.fr/files/	NA	DBVPG1108	BILOSW	Wine	Australia	2	WineEuropean	Peter and De Chiara et al., Nature, 2018
484	http://1002genomes.u-strasbg.fr/files/	NA	DBVPG1122	BIMOSW	Wine	Lucera, Puglia, Italy	2	WineEuropean	Peter and De Chiara et al., Nature, 2018
485	http://1002genomes.u-strasbg.fr/files/	NA	DBVPG1123	BINOSW	Wine	Manduria, Taranto, Italy	2	WineEuropean	Peter and De Chiara et al., Nature, 2018
486	http://1002genomes.u-strasbg.fr/files/	NA	DBVPG1125	BIPOSW	Wine	Torre dei Passeri, Italy	2	WineEuropean	Peter and De Chiara et al., Nature, 2018
487	http://1002genomes.u-strasbg.fr/files/	NA	DBVPG1126	BIQOSW	Wine	Aquila, Italy	1	WineEuropean	Peter and De Chiara et al., Nature, 2018
488	http://1002genomes.u-strasbg.fr/files/	NA	DBVPG1127	BIROSW	Wine	Popoli, Italy	2	WineEuropean	Peter and De Chiara et al., Nature, 2018
489	http://1002genomes.u-strasbg.fr/files/	NA	DBVPG1129	BISOSW	Wine	Senigallia, Italy	2	WineEuropean	Peter and De Chiara et al., Nature, 2018
490	http://1002genomes.u-strasbg.fr/files/	NA	DBVPG1145	BITOSW	Wine	Corvo, Sicily, Italy	2	WineEuropean	Peter and De Chiara et al., Nature, 2018
491	http://1002genomes.u-strasbg.fr/files/	NA	DBVPG1163	BKAOSW	Fruit	Aurum, Sicily, Italy	2	WineEuropean	Peter and De Chiara et al., Nature, 2018
492	http://1002genomes.u-strasbg.fr/files/	NA	DBVPG1339	BKCOSW	Wine	Netherlands	2	WineEuropean	Peter and De Chiara et al., Nature, 2018
493	http://1002genomes.u-strasbg.fr/files/	NA	DBVPG1374	BKDOSW	Soil	Netherlands	2	WineEuropean	Peter and De Chiara et al., Nature, 2018
494	http://1002genomes.u-strasbg.fr/files/	NA	DBVPG1380	BKEOSW	Wine	Rufina, Italy	2	WineEuropean	Peter and De Chiara et al., Nature, 2018
495	http://1002genomes.u-strasbg.fr/files/	NA	DBVPG1473	BKFOSW	Wine	Piemonte, Italy	2	WineEuropean	Peter and De Chiara et al., Nature, 2018
496	http://1002genomes.u-strasbg.fr/files/	NA	DBVPG1490	BKGOSW	Wine	Etna, Sicily, Italy	2	WineEuropean	Peter and De Chiara et al., Nature, 2018
497	http://1002genomes.u-strasbg.fr/files/	NA	DBVPG1523	BKHOSW	Wine	Trentino, Italy	2	WineEuropean	Peter and De Chiara et al., Nature, 2018
498	http://1002genomes.u-strasbg.fr/files/	NA	DBVPG1554	BKIOSW	Wine	Dalmatia	2	WineEuropean	Peter and De Chiara et al., Nature, 2018
499	http://1002genomes.u-strasbg.fr/files/	NA	DBVPG1555	BKKOSW	Unknown	Radgona, Slovenia	2	WineEuropean	Peter and De Chiara et al., Nature, 2018
500	http://1002genomes.u-strasbg.fr/files/	NA	DBVPG1564	BKLOSW	Wine	Dolianova, Sardinia, Italy	2	WineEuropean	Peter and De Chiara et al., Nature, 2018
501	http://1002genomes.u-strasbg.fr/files/	NA	DBVPG1577	BKMOSW	Wine	Elmas, Sardinia, Italy	2	WineEuropean	Peter and De Chiara et al., Nature, 2018
502	http://1002genomes.u-strasbg.fr/files/	NA	DBVPG1580	BKNOSW	Wine	Sardinia, Italy	2	WineEuropean	Peter and De Chiara et al., Nature, 2018
503	http://1002genomes.u-strasbg.fr/files/	NA	DBVPG1581	BKPOSW	Wine	Marassinai, Sardinia, Italy	2	WineEuropean	Peter and De Chiara et al., Nature, 2018
504	http://1002genomes.u-strasbg.fr/files/	NA	DBVPG1584	BKQOSW	Unknown	Porec, Istria	2	WineEuropean	Peter and De Chiara et al., Nature, 2018
505	http://1002genomes.u-strasbg.fr/files/	NA	DBVPG1594	BKROSW	Wine	Los Cerros, La Mancha, Spain	2	WineEuropean	Peter and De Chiara et al., Nature, 2018
506	http://1002genomes.u-strasbg.fr/files/	NA	DBVPG1595	BKSOSW	Wine	La Mancha, Spain	2	WineEuropean	Peter and De Chiara et al., Nature, 2018
507	http://1002genomes.u-strasbg.fr/files/	NA	DBVPG1596	BKTOSW	Wine	Santa Cruz de los Canamos, La Mancha, Spain	2	WineEuropean	Peter and De Chiara et al., Nature, 2018
508	http://1002genomes.u-strasbg.fr/files/	NA	DBVPG1599	BLAOSW	Wine	Cerro del Moro, La Mancha, Spain	2	WineEuropean	Peter and De Chiara et al., Nature, 2018
509	http://1002genomes.u-strasbg.fr/files/	NA	DBVPG1601	BLBOSW	Wine	Casa del Rey, La Mancha, Spain	2	WineEuropean	Peter and De Chiara et al., Nature, 2018
510	http://1002genomes.u-strasbg.fr/files/	NA	DBVPG1606	BLCOSW	Wine	Villarta de San Juan, La Mancha, Spain	2	WineEuropean	Peter and De Chiara et al., Nature, 2018
511	http://1002genomes.u-strasbg.fr/files/	NA	DBVPG1608	BLDOSW	Wine	La Mancha, Spain	2	WineEuropean	Peter and De Chiara et al., Nature, 2018
512	http://1002genomes.u-strasbg.fr/files/	NA	DBVPG1611	BLEOSW	Wine	Retamosa, La Mancha, Spain	2	WineEuropean	Peter and De Chiara et al., Nature, 2018
513	http://1002genomes.u-strasbg.fr/files/	NA	DBVPG1615	BLFOSW	Wine	La Mancha, Spain	2	WineEuropean	Peter and De Chiara et al., Nature, 2018
514	http://1002genomes.u-strasbg.fr/files/	NA	DBVPG1625	BLGOSW	Wine	La Enconienda, La Mancha, Spain	2	WineEuropean	Peter and De Chiara et al., Nature, 2018
515	http://1002genomes.u-strasbg.fr/files/	NA	DBVPG1626	BLHOSW	Wine	La Mancha, Spain	2	WineEuropean	Peter and De Chiara et al., Nature, 2018
516	http://1002genomes.u-strasbg.fr/files/	NA	DBVPG1629	BLIOSW	Wine	La Mancha, Spain	2	WineEuropean	Peter and De Chiara et al., Nature, 2018
517	http://1002genomes.u-strasbg.fr/files/	NA	DBVPG1631	BLKOSW	Wine	Valdepenas, La Mancha, Spain	2	WineEuropean	Peter and De Chiara et al., Nature, 2018
518	http://1002genomes.u-strasbg.fr/files/	NA	DBVPG1632	BLLOSW	Wine	Abertura, La Mancha, Spain	2	WineEuropean	Peter and De Chiara et al., Nature, 2018
519	http://1002genomes.u-strasbg.fr/files/	NA	DBVPG1656	BLMOSW	Wine	Los Campillos, La Mancha, Spain	2	WineEuropean	Peter and De Chiara et al., Nature, 2018
520	http://1002genomes.u-strasbg.fr/files/	NA	DBVPG1659	BLNOSW	Wine	Campo de Santiago, La Mancha, Spain	2	WineEuropean	Peter and De Chiara et al., Nature, 2018
521	http://1002genomes.u-strasbg.fr/files/	NA	DBVPG1661	BLPOSW	Wine	Los Polos, La Mancha, Spain	2	WineEuropean	Peter and De Chiara et al., Nature, 2018
522	http://1002genomes.u-strasbg.fr/files/	NA	DBVPG1669	BLQOSW	Wine	Cenicero, Rioja, Spain	2	WineEuropean	Peter and De Chiara et al., Nature, 2018
523	http://1002genomes.u-strasbg.fr/files/	NA	DBVPG1973	BLROSW	Wine	Greece	2	WineEuropean	Peter and De Chiara et al., Nature, 2018
524	http://1002genomes.u-strasbg.fr/files/	NA	DBVPG1975	BLSOSW	Wine	Greece	2	WineEuropean	Peter and De Chiara et al., Nature, 2018
525	http://1002genomes.u-strasbg.fr/files/	NA	DBVPG1984	BLTOSW	Wine	Slovenia	2	WineEuropean	Peter and De Chiara et al., Nature, 2018
526	http://1002genomes.u-strasbg.fr/files/	NA	DBVPG3022	BLVOSW	Wine	Squinzano, Italy	2	WineEuropean	Peter and De Chiara et al., Nature, 2018
527	http://1002genomes.u-strasbg.fr/files/	NA	UWOPS03-429.1	BMAOSW	Tree	Malaysia	2	Malaysian	Naumov et al., Micr., 2009
528	http://1002genomes.u-strasbg.fr/files/	NA	UWOPS03-433.3	BMBOSW	Tree	Malaysia	2	Malaysian	Naumov et al., Micr., 2009
529	http://1002genomes.u-strasbg.fr/files/	NA	UWOPS03-459.1	BMCOSW	Tree	Malaysia	2	Malaysian	Naumov et al., Micr., 2009
530	http://1002genomes.u-strasbg.fr/files/	NA	384103A	BMDOSW	Human	RVI Newcastle, UK	2	MosaicsR3	Peter and De Chiara et al., Nature, 2018
531	http://1002genomes.u-strasbg.fr/files/	NA	368428S	BMEOSW	Human	RVI Newcastle, UK	3	DairyProducts	Peter and De Chiara et al., Nature, 2018
532	http://1002genomes.u-strasbg.fr/files/	NA	269521J	BMFOSW	Human	RVI Newcastle, UK	2	MosaicsR3	Peter and De Chiara et al., Nature, 2018
533	http://1002genomes.u-strasbg.fr/files/	NA	NCYC_2925	BMGOSW	Human, clinical	Norway	3	MixOrigin	Peter and De Chiara et al., Nature, 2018
534	http://1002genomes.u-strasbg.fr/files/	NA	YJM984	BMHOSW	Human, clinical	Italy	2	WineEuropean2	Strope, Gen Res, 2015
535	http://1002genomes.u-strasbg.fr/files/	NA	YJM989	BMIOSW	Human, clinical	Italy	2	WineEuropean2	Strope, Gen Res, 2015
536	http://1002genomes.u-strasbg.fr/files/	NA	YJM990	BMKOSW	Human, clinical	Italy	2	WineEuropean2	McCullough et al., JoCM, 1998
537	http://1002genomes.u-strasbg.fr/files/	NA	NCYC_2780	BMLOSW	Human, clinical	Belgium	4	MixOrigin	Peter and De Chiara et al., Nature, 2018
538	http://1002genomes.u-strasbg.fr/files/	NA	2680	BMMOSW	Human, clinical	Vall d'Hebron hospital, Barcelona, Spain	4	MixOrigin	Peter and De Chiara et al., Nature, 2018
539	http://1002genomes.u-strasbg.fr/files/	NA	2698	BMNOSW	Human, clinical	Vall d'Hebron hospital, Barcelona, Spain	2	WineEuropean3	Peter and De Chiara et al., Nature, 2018
540	http://1002genomes.u-strasbg.fr/files/	NA	2720	BMQOSW	Human, clinical	La Fe Hospital,Valencia, Spain	2	MosaicsR3	Peter and De Chiara et al., Nature, 2018
541	http://1002genomes.u-strasbg.fr/files/	NA	CEY646	BMROSW	Nature	French Guiana	2	FrenchGuiana	Angebault et al., JID, 2013
542	http://1002genomes.u-strasbg.fr/files/	NA	CEY649	BMVOSW	Nature	French Guiana	2	FrenchGuiana	Angebault et al., JID, 2013
543	http://1002genomes.u-strasbg.fr/files/	NA	CEY650	BNAOSW	Nature	French Guiana	2	FrenchGuiana	Angebault et al., JID, 2013
544	http://1002genomes.u-strasbg.fr/files/	NA	CEY651	BNBOSW	Fruit	French Guiana	2	FrenchGuiana	Angebault et al., JID, 2013
545	http://1002genomes.u-strasbg.fr/files/	NA	CEY652	BNCOSW	Fruit	French Guiana	2	FrenchGuiana	Angebault et al., JID, 2013
546	http://1002genomes.u-strasbg.fr/files/	NA	CEY653	BNDOSW	Fruit	French Guiana	2	FrenchGuiana	Angebault et al., JID, 2013
547	http://1002genomes.u-strasbg.fr/files/	NA	DBVPG1057	BNEOSW	Wine	Colli Romani, Lazio, Italy	2	WineEuropean	Peter and De Chiara et al., Nature, 2018
548	http://1002genomes.u-strasbg.fr/files/	NA	DBVPG1078	BNFOSW	Wine	San Ferdinando, Italy	2	WineEuropean	Peter and De Chiara et al., Nature, 2018
549	http://1002genomes.u-strasbg.fr/files/	NA	DBVPG1085	BNGOSW	Wine	Corato, Italy	3	WineEuropean	Peter and De Chiara et al., Nature, 2018
550	http://1002genomes.u-strasbg.fr/files/	NA	DBVPG1685	BNHOSW	Wine	Haro, Rioja, Spain	2	WineEuropean	Peter and De Chiara et al., Nature, 2018
551	http://1002genomes.u-strasbg.fr/files/	NA	DBVPG1699	BNIOSW	Wine	De Casa la Reina, Rioja, Spain	2	WineEuropean	Peter and De Chiara et al., Nature, 2018
552	http://1002genomes.u-strasbg.fr/files/	NA	DBVPG1701	BNKOSW	Wine	Cihuri, Rioja, Spain	2	WineEuropean	Peter and De Chiara et al., Nature, 2018
553	http://1002genomes.u-strasbg.fr/files/	NA	DBVPG1708	BNLOSW	Soil	Ultura, Sweden	2	WineEuropean	Peter and De Chiara et al., Nature, 2018
554	http://1002genomes.u-strasbg.fr/files/	NA	DBVPG1711	BNMOSW	Wine	Ygai, Rioja, Spain	2	WineEuropean	Peter and De Chiara et al., Nature, 2018
555	http://1002genomes.u-strasbg.fr/files/	NA	DBVPG1712	BNNOSW	Wine	Pedrejon, Rioja, Spain	2	WineEuropean	Peter and De Chiara et al., Nature, 2018
556	http://1002genomes.u-strasbg.fr/files/	NA	DBVPG1714	BNPOSW	Wine	Fuen Mayor, Rioja, Spain	2	WineEuropean	Peter and De Chiara et al., Nature, 2018
557	http://1002genomes.u-strasbg.fr/files/	NA	DBVPG1719	BNQOSW	Wine	San Adrian, Rioja, Spain	2	WineEuropean	Peter and De Chiara et al., Nature, 2018
558	http://1002genomes.u-strasbg.fr/files/	NA	DBVPG1725	BNROSW	Wine	La Puebla de la Barca, Rioja, Spain	2	WineEuropean	Peter and De Chiara et al., Nature, 2018
559	http://1002genomes.u-strasbg.fr/files/	NA	DBVPG1772	BNTOSW	Soil	Kuopio, Finland	2	WineEuropean	Peter and De Chiara et al., Nature, 2018
560	http://1002genomes.u-strasbg.fr/files/	NA	DBVPG1790	BNVOSW	Soil	Turku, Finland	2	WineEuropean	Peter and De Chiara et al., Nature, 2018
561	http://1002genomes.u-strasbg.fr/files/	NA	DBVPG1792	BPAOSW	Soil	Viik, Helsinki, Finland	2	MosaicsR3	Peter and De Chiara et al., Nature, 2018
562	http://1002genomes.u-strasbg.fr/files/	NA	DBVPG1795	BPBOSW	Wine	Illasi, Verona, Italy	2	WineEuropean	Peter and De Chiara et al., Nature, 2018
563	http://1002genomes.u-strasbg.fr/files/	NA	DBVPG1798	BPCOSW	Wine	Sicily, Italy	2	WineEuropean	Peter and De Chiara et al., Nature, 2018
564	http://1002genomes.u-strasbg.fr/files/	NA	DBVPG1832	BPFOSW	Fruit	NA	2	WineEuropean	Peter and De Chiara et al., Nature, 2018
565	http://1002genomes.u-strasbg.fr/files/	NA	DBVPG1841	BPGOSW	Unknown	Ethiopia	2	WineEuropean	Peter and De Chiara et al., Nature, 2018
566	http://1002genomes.u-strasbg.fr/files/	NA	DBVPG1843	BPHOSW	Unknown	Ethiopia	2	WineEuropean	Peter and De Chiara et al., Nature, 2018
567	http://1002genomes.u-strasbg.fr/files/	NA	DBVPG1848	BPIOSW	Unknown	Ethiopia	2	Other	Peter and De Chiara et al., Nature, 2018
568	http://1002genomes.u-strasbg.fr/files/	NA	DBVPG1861	BPKOSW	Water	Rajamaki River, Finland	2	WineEuropean	Peter and De Chiara et al., Nature, 2018
569	http://1002genomes.u-strasbg.fr/files/	NA	DBVPG1878	BPLOSW	Wine	Piave, Italy	2	WineEuropean4	Peter and De Chiara et al., Nature, 2018
570	http://1002genomes.u-strasbg.fr/files/	NA	DBVPG1880	BPMOSW	Wine	Italy	2	WineEuropean	Peter and De Chiara et al., Nature, 2018
571	http://1002genomes.u-strasbg.fr/files/	NA	DBVPG1895	BPNOSW	Wine	Italy	2	Other	Peter and De Chiara et al., Nature, 2018
572	http://1002genomes.u-strasbg.fr/files/	NA	DBVPG1898	BPPOSW	Wine	Pantelleria, Italy	2	WineEuropean	Peter and De Chiara et al., Nature, 2018
573	http://1002genomes.u-strasbg.fr/files/	NA	DBVPG1918	BPQOSW	Wine	Malta	2	WineEuropean1	Peter and De Chiara et al., Nature, 2018
574	http://1002genomes.u-strasbg.fr/files/	NA	DBVPG1919	BPROSW	Nature	Italy	3	WineEuropean4	Peter and De Chiara et al., Nature, 2018
575	http://1002genomes.u-strasbg.fr/files/	NA	DBVPG1960	BPTOSW	Wine	Recioto, Verona, Italy	2	WineEuropean	Peter and De Chiara et al., Nature, 2018
576	http://1002genomes.u-strasbg.fr/files/	NA	DBVPG1976	BPVOSW	Wine	Slovakia	2	WineEuropean	Peter and De Chiara et al., Nature, 2018
577	http://1002genomes.u-strasbg.fr/files/	NA	DBVPG1994	BQAOSW	Wine	Greece	2	WineEuropean1	Peter and De Chiara et al., Nature, 2018
578	http://1002genomes.u-strasbg.fr/files/	NA	DBVPG2049	BQBOSW	Wine	Reggio Emilia, Italy	2	WineEuropean	Peter and De Chiara et al., Nature, 2018
579	http://1002genomes.u-strasbg.fr/files/	NA	DBVPG2088	BQCOSW	Distillery	Cognac, France	2	WineEuropean	Peter and De Chiara et al., Nature, 2018
580	http://1002genomes.u-strasbg.fr/files/	NA	DBVPG2166	BQEOSW	Wine	production zone of Sagrantino wine, Montefalco, Foligno, Italy	2	WineEuropean	Peter and De Chiara et al., Nature, 2018
581	http://1002genomes.u-strasbg.fr/files/	NA	DBVPG3098	BQGOSW	Wine	Calabria, Italy	2	WineEuropean	Peter and De Chiara et al., Nature, 2018
582	http://1002genomes.u-strasbg.fr/files/	NA	DBVPG3100	BQHOSW	Wine	Toscana, Italy	2	WineEuropean	Peter and De Chiara et al., Nature, 2018
583	http://1002genomes.u-strasbg.fr/files/	NA	DBVPG3924	BQIOSW	Wine	Piave, Italy	2	WineEuropean	Peter and De Chiara et al., Nature, 2018
584	http://1002genomes.u-strasbg.fr/files/	NA	DBVPG4162	BQMOSW	Wine	Reggio Emilia, Italy	2	WineEuropean	Peter and De Chiara et al., Nature, 2018
585	http://1002genomes.u-strasbg.fr/files/	NA	DBVPG4186	BQNOSW	Wine	Slovenia	2	WineEuropean1	Peter and De Chiara et al., Nature, 2018
586	http://1002genomes.u-strasbg.fr/files/	NA	DBVPG4297	BQPOSW	Wine	Treviso, Italy	2	WineEuropean	Peter and De Chiara et al., Nature, 2018
587	http://1002genomes.u-strasbg.fr/files/	NA	DBVPG4317	BQQOSW	Wine	Bettona, Perugia, Italy	2	WineEuropean	Peter and De Chiara et al., Nature, 2018
588	http://1002genomes.u-strasbg.fr/files/	NA	DBVPG4381	BQROSW	Water	Italy	2	WineEuropean	Peter and De Chiara et al., Nature, 2018
589	http://1002genomes.u-strasbg.fr/files/	NA	DBVPG4410	BQSOSW	Wine	Italy	2	WineEuropean	Peter and De Chiara et al., Nature, 2018
590	http://1002genomes.u-strasbg.fr/files/	NA	DBVPG4460	BQTOSW	Wine	Jesi, Italy	2	WineEuropean	Peter and De Chiara et al., Nature, 2018
591	http://1002genomes.u-strasbg.fr/files/	NA	DBVPG4651	BRAOSW	Nature	Italy	2	WineEuropean	Peter and De Chiara et al., Nature, 2018
592	http://1002genomes.u-strasbg.fr/files/	NA	DBVPG4686	BRBOSW	Wine	Deruta, Perugia, Italy	2	WineEuropean	Peter and De Chiara et al., Nature, 2018
593	http://1002genomes.u-strasbg.fr/files/	NA	DBVPG4695	BRCOSW	Wine	Torgiano, Perugia, Italy	2	WineEuropean1	Peter and De Chiara et al., Nature, 2018
594	http://1002genomes.u-strasbg.fr/files/	NA	DBVPG4902	BRDOSW	Unknown	Perugia, Italy	2	WineEuropean	Peter and De Chiara et al., Nature, 2018
595	http://1002genomes.u-strasbg.fr/files/	NA	DBVPG4905	BREOSW	Wine	Marsciano, Perugia, Italy	2	WineEuropean	Peter and De Chiara et al., Nature, 2018
596	http://1002genomes.u-strasbg.fr/files/	NA	DBVPG5760	BRFOSW	Wine	Production zone of Sagrantino wine, Montefalco, Foligno, Italy	2	WineEuropean	Peter and De Chiara et al., Nature, 2018
597	http://1002genomes.u-strasbg.fr/files/	NA	DBVPG5836	BRGOSW	Soil	District of Hamma Bouziane, Constantine, Algeria	3	Huangjiu	Peter and De Chiara et al., Nature, 2018
598	http://1002genomes.u-strasbg.fr/files/	NA	DBVPG6223	BRHOSW	Wine	Spain	2	WineEuropean	Peter and De Chiara et al., Nature, 2018
599	http://1002genomes.u-strasbg.fr/files/	NA	DBVPG6302	BRKOSW	Industrial	Spain	2	Alpechin	Peter and De Chiara et al., Nature, 2018
600	http://1002genomes.u-strasbg.fr/files/	NA	DBVPG6350	BRLOSW	Unknown	USA	1	MosaicsR3	Peter and De Chiara et al., Nature, 2018
601	http://1002genomes.u-strasbg.fr/files/	NA	DBVPG6590	BRMOSW	Distillery	Brazil	1	MosaicsBeer	Peter and De Chiara et al., Nature, 2018
602	http://1002genomes.u-strasbg.fr/files/	NA	DBVPG6694	BRPOSW	Beer	Belgium	4	Beer	Peter and De Chiara et al., Nature, 2018
603	http://1002genomes.u-strasbg.fr/files/	NA	DBVPG6695	BRQOSW	Beer	Belgium	4	Beer	Peter and De Chiara et al., Nature, 2018
604	http://1002genomes.u-strasbg.fr/files/	NA	DBVPG6874	BRVOSW	Human, clinical	USA	2	MosaicsR3	Peter and De Chiara et al., Nature, 2018
605	http://1002genomes.u-strasbg.fr/files/	NA	DBVPG6876	BSAOSW	Wine	Frog's Leap Winery, California, USA	2	WineEuropean	Peter and De Chiara et al., Nature, 2018
606	http://1002genomes.u-strasbg.fr/files/	NA	DBVPG6877	BSBOSW	Wine	Sterling Winery, California, USA	2	WineEuropean	Peter and De Chiara et al., Nature, 2018
607	http://1002genomes.u-strasbg.fr/files/	NA	DBVPG6878	BSCOSW	Wine	Mondavi Winery, California, USA	2	WineEuropean	Peter and De Chiara et al., Nature, 2018
608	http://1002genomes.u-strasbg.fr/files/	NA	DBVPG6879	BSDOSW	Wine	Newton Winery, California, USA	2	WineEuropean	Peter and De Chiara et al., Nature, 2018
609	http://1002genomes.u-strasbg.fr/files/	NA	DBVPG6880	BSEOSW	Wine	Ridge Winery, California, USA	2	WineEuropean	Peter and De Chiara et al., Nature, 2018
610	http://1002genomes.u-strasbg.fr/files/	NA	DBVPG6295	BSGOSW	Wine	South Africa	2	WineEuropean	Peter and De Chiara et al., Nature, 2018
611	http://1002genomes.u-strasbg.fr/files/	NA	DBVPG6693	BSIOSW	Beer	Belgium	4	Beer	Peter and De Chiara et al., Nature, 2018
612	http://1002genomes.u-strasbg.fr/files/	NA	D3742	BSKOSW	Unknown	France	2	MosaicsR3	Peter and De Chiara et al., Nature, 2018
613	http://1002genomes.u-strasbg.fr/files/	NA	M57	BSLOSW	Wine	Italy	2	WineEuropean	Stefanini et al., PNAS, 2016
614	http://1002genomes.u-strasbg.fr/files/	NA	SGU89	BSMOSW	Wine	Italy	2	WineEuropean	Stefanini et al., PNAS, 2016
615	http://1002genomes.u-strasbg.fr/files/	NA	SG60	BSNOSW	Wine	Italy	2	WineEuropean	Stefanini et al., PNAS, 2016
616	http://1002genomes.u-strasbg.fr/files/	NA	L-1183	BSPOSW	Wine	Uruguay	2	WineEuropean	Peter and De Chiara et al., Nature, 2018
617	http://1002genomes.u-strasbg.fr/files/	NA	L-958	BSROSW	Wine	Mendoza area, Argentina	2	WineEuropean	Peter and De Chiara et al., Nature, 2018
618	http://1002genomes.u-strasbg.fr/files/	NA	L-960	BSSOSW	Wine	Mendoza area, Argentina	2	WineEuropean	Peter and De Chiara et al., Nature, 2018
619	http://1002genomes.u-strasbg.fr/files/	NA	L-962	BSTOSW	Wine	Mendoza area, Argentina	2	WineEuropean	Peter and De Chiara et al., Nature, 2018
620	http://1002genomes.u-strasbg.fr/files/	NA	NCYC_2798	BTAOSW	Human, clinical	Germany	3	MosaicsR3	Peter and De Chiara et al., Nature, 2018
621	http://1002genomes.u-strasbg.fr/files/	NA	77	BTBOSW	Bakery	NA	3	MosaicsR3	Peter and De Chiara et al., Nature, 2018
622	http://1002genomes.u-strasbg.fr/files/	NA	79	BTCOSW	Bakery	NA	2	MixOrigin	Peter and De Chiara et al., Nature, 2018
623	http://1002genomes.u-strasbg.fr/files/	NA	YS5(E)	BTDOSW	Bakery	NA	4	MixOrigin	Bell et al., LAM, 2001
624	http://1002genomes.u-strasbg.fr/files/	NA	YS8(E)	BTEOSW	Bakery	NA	4	MixOrigin	Bell et al., LAM, 2001
625	http://1002genomes.u-strasbg.fr/files/	NA	YS22(E)	BTFOSW	Bakery	NA	2	MixOrigin	Bell et al., LAM, 2001
626	http://1002genomes.u-strasbg.fr/files/	NA	ZP_567	BTGOSW	Tree	Portugal, Castelo de Vide,	2	MedOak	Peter and De Chiara et al., Nature, 2018
627	http://1002genomes.u-strasbg.fr/files/	NA	ZP_577	BTHOSW	Tree	Portugal, Aldeia das Dez, S. Estrela,	2	WineEuropean	Peter and De Chiara et al., Nature, 2018
628	http://1002genomes.u-strasbg.fr/files/	NA	ZP_611	BTIOSW	Tree	Canada, Vancouver,	2	MosaicsR3	Peter and De Chiara et al., Nature, 2018
629	http://1002genomes.u-strasbg.fr/files/	NA	L-304	BTLOSW	Wine	Chile	2	WineEuropean	Peter and De Chiara et al., Nature, 2018
630	http://1002genomes.u-strasbg.fr/files/	NA	L-475	BTNOSW	Wine	Chile	2	WineEuropean	Peter and De Chiara et al., Nature, 2018
631	http://1002genomes.u-strasbg.fr/files/	NA	L-1198	BTPOSW	Wine	Valle de Ica, Peru	2	WineEuropean	Cubillos et al., FEMS ME, 2009
632	http://1002genomes.u-strasbg.fr/files/	NA	L-1201	BTROSW	Wine	Valle de Ica, Peru	2	WineEuropean	Cubillos et al., FEMS ME, 2009
633	http://1002genomes.u-strasbg.fr/files/	NA	RIB1005	BTSOSW	Sake	Japan	2	Sake-A	Peter and De Chiara et al., Nature, 2018
634	http://1002genomes.u-strasbg.fr/files/	NA	M.9.1	BTTOSW	Distillery	Brazil	2	Bioethanol	Antonangelo et al., Yeast, 2013
635	http://1002genomes.u-strasbg.fr/files/	NA	M.14.1	BTVOSW	Distillery	Brazil	2	Bioethanol	Antonangelo et al., Yeast, 2013
636	http://1002genomes.u-strasbg.fr/files/	NA	RP.10.4	BVAOSW	Bioethanol	Brazil	2	Bioethanol	Antonangelo et al., Yeast, 2013
637	http://1002genomes.u-strasbg.fr/files/	NA	RP.10.13	BVBOSW	Bioethanol	Brazil	2	Bioethanol	Antonangelo et al., Yeast, 2013
638	http://1002genomes.u-strasbg.fr/files/	NA	RP.10.14	BVCOSW	Bioethanol	Brazil	2	Bioethanol	Antonangelo et al., Yeast, 2013
639	http://1002genomes.u-strasbg.fr/files/	NA	SM.9.1.AL1	BVDOSW	Bioethanol	Brazil	2	Bioethanol	Antonangelo et al., Yeast, 2013
640	http://1002genomes.u-strasbg.fr/files/	NA	SM.9.1.BL7	BVEOSW	Bioethanol	Brazil	1	Bioethanol	Antonangelo et al., Yeast, 2013
641	http://1002genomes.u-strasbg.fr/files/	NA	SM.9.2.BR3(L)	BVFOSW	Bioethanol	Brazil	2	Bioethanol	Antonangelo et al., Yeast, 2013
642	http://1002genomes.u-strasbg.fr/files/	NA	SM.9.4.BL2	BVGOSW	Bioethanol	Brazil	2	Bioethanol	Antonangelo et al., Yeast, 2013
643	http://1002genomes.u-strasbg.fr/files/	NA	SM.9.4.BR1	BVHOSW	Bioethanol	Brazil	2	Bioethanol	Antonangelo et al., Yeast, 2013
644	http://1002genomes.u-strasbg.fr/files/	NA	4LBI-3	BVKOSW	Wine	Basilicata, Italy	2	WineEuropean	Peter and De Chiara et al., Nature, 2018
645	http://1002genomes.u-strasbg.fr/files/	NA	SA6-31	BVMOSW	Wine	Toscana, Italy	2	WineEuropean	Peter and De Chiara et al., Nature, 2018
646	http://1002genomes.u-strasbg.fr/files/	NA	B-24	BVTOSW		Georgia	2	WineEuropean4	Capece et al., Food Micr., 2013
647	http://1002genomes.u-strasbg.fr/files/	NA	8-15	BVVOSW	Wine	Georgia	2	WineEuropean4	Capece et al., Food Micr., 2013
648	http://1002genomes.u-strasbg.fr/files/	NA	5-18	CAAOSW	Wine	Georgia	2	WineEuropean4	Capece et al., Food Micr., 2013
649	http://1002genomes.u-strasbg.fr/files/	NA	2021-08-11	CABOSW	Wine	Georgia	2	WineEuropean4	Capece et al., Food Micr., 2013
650	http://1002genomes.u-strasbg.fr/files/	NA	A-12	CACOSW	Wine	Georgia	2	WineEuropean4	Capece et al., Food Micr., 2013
651	http://1002genomes.u-strasbg.fr/files/	NA	11-18	CADOSW	Wine	Georgia	2	WineEuropean4	Capece et al., Food Micr., 2013
652	http://1002genomes.u-strasbg.fr/files/	NA	B-4	CAEOSW	Wine	Georgia	2	WineEuropean	Capece et al., Food Micr., 2013
653	http://1002genomes.u-strasbg.fr/files/	NA	C-3	CAFOSW	Wine	Georgia	2	WineEuropean	Capece et al., Food Micr., 2013
654	http://1002genomes.u-strasbg.fr/files/	NA	D-1	CAHOSW	Wine	Georgia	2	WineEuropean	Capece et al., Food Micr., 2013
655	http://1002genomes.u-strasbg.fr/files/	NA	D-4	CAIOSW	Wine	Georgia	2	WineEuropean	Capece et al., Food Micr., 2013
656	http://1002genomes.u-strasbg.fr/files/	NA	A-16	CAKOSW	Wine	Georgia	2	WineEuropean	Capece et al., Food Micr., 2013
657	http://1002genomes.u-strasbg.fr/files/	NA	A-19	CALOSW	Wine	Georgia	2	WineEuropean	Capece et al., Food Micr., 2013
658	http://1002genomes.u-strasbg.fr/files/	NA	2021-07-09	CAMOSW	Wine	Georgia	2	WineEuropean4	Capece et al., Food Micr., 2013
659	http://1002genomes.u-strasbg.fr/files/	NA	2021-03-08	CANOSW	Wine	Georgia	2	WineEuropean4	Capece et al., Food Micr., 2013
660	http://1002genomes.u-strasbg.fr/files/	NA	2021-02-11	CAPOSW	Wine	Georgia	2	WineEuropean4	Capece et al., Food Micr., 2013
661	http://1002genomes.u-strasbg.fr/files/	NA	2021-02-05	CAQOSW	Wine	Georgia	2	WineEuropean4	Capece et al., Food Micr., 2013
662	http://1002genomes.u-strasbg.fr/files/	NA	A-9	CAROSW	Wine	Georgia	2	WineEuropean4	Capece et al., Food Micr., 2013
663	http://1002genomes.u-strasbg.fr/files/	NA	B-17	CASOSW	Wine	Georgia	2	WineEuropean4	Capece et al., Food Micr., 2013
664	http://1002genomes.u-strasbg.fr/files/	NA	C-12	CATOSW	Wine	Georgia	2	WineEuropean4	Capece et al., Food Micr., 2013
665	http://1002genomes.u-strasbg.fr/files/	NA	B-13	CAVOSW	Wine	Georgia	2	WineEuropean4	Capece et al., Food Micr., 2013
666	http://1002genomes.u-strasbg.fr/files/	NA	A-14	CBAOSW	Wine	Georgia	2	WineEuropean	Capece et al., Food Micr., 2013
667	http://1002genomes.u-strasbg.fr/files/	NA	2021-09-01	CBBOSW	Wine	Georgia	2	WineEuropean4	Capece et al., Food Micr., 2013
668	http://1002genomes.u-strasbg.fr/files/	NA	D-18	CBCOSW	Wine	Georgia	2	WineEuropean4	Capece et al., Food Micr., 2013
669	http://1002genomes.u-strasbg.fr/files/	NA	B-11	CBDOSW	Wine	Georgia	2	WineEuropean4	Capece et al., Food Micr., 2013
670	http://1002genomes.u-strasbg.fr/files/	NA	D-21	CBEOSW	Wine	Georgia	2	WineEuropean4	Capece et al., Food Micr., 2013
671	http://1002genomes.u-strasbg.fr/files/	NA	SD-15	CBFOSW	Bakery	Matera, Italy	4	MixOrigin	Peter and De Chiara et al., Nature, 2018
672	http://1002genomes.u-strasbg.fr/files/	NA	DBVPG1978	CBGOSW	Wine	Slovakia	2	WineEuropean	Peter and De Chiara et al., Nature, 2018
673	http://1002genomes.u-strasbg.fr/files/	NA	DBVPG3051	CBHOSW	Wine	Israel	2	WineEuropean	Peter and De Chiara et al., Nature, 2018
674	http://1002genomes.u-strasbg.fr/files/	NA	DBVPG4036	CBIOSW	Wine	ex Yugoslavia	2	WineEuropean1	Peter and De Chiara et al., Nature, 2018
675	http://1002genomes.u-strasbg.fr/files/	NA	1	CBKOSW	Insect	Schleswig-Holstein	1	MosaicsR3	Peter and De Chiara et al., Nature, 2018
676	http://1002genomes.u-strasbg.fr/files/	NA	2	CBLOSW	Insect	Schleswig-Holstein	2	MosaicsR3	Peter and De Chiara et al., Nature, 2018
677	http://1002genomes.u-strasbg.fr/files/	NA	3	CBMOSW	Insect	Forest of Nehmten in Schleswig-Holstein	2	MosaicsR3	Peter and De Chiara et al., Nature, 2018
678	http://1002genomes.u-strasbg.fr/files/	NA	NCYC_88	CBNOSW	Beer	UK	2	MosaicsBeer	Peter and De Chiara et al., Nature, 2018
679	http://1002genomes.u-strasbg.fr/files/	NA	NCYC_1187	CBROSW	Beer	UK	4	Beer	Peter and De Chiara et al., Nature, 2018
680	http://1002genomes.u-strasbg.fr/files/	NA	CLQCA_20-156	CCCOSW	Flower	Yasuni, Orellana	2	SouthAmericaMix1	Peter and De Chiara et al., Nature, 2018
681	http://1002genomes.u-strasbg.fr/files/	NA	CLQCA_20-184	CCDOSW	Flower	Yasuni, Orellana	2	SouthAmericaMix1	Peter and De Chiara et al., Nature, 2018
682	http://1002genomes.u-strasbg.fr/files/	NA	CLQCA_20-221	CCEOSW	Flower	Yasuni, Orellana	2	SouthAmericaMix1	Peter and De Chiara et al., Nature, 2018
683	http://1002genomes.u-strasbg.fr/files/	NA	CLQCA_20-246	CCFOSW	Insect	Yasuni, Orellana	2	SouthAmericaMix1	Peter and De Chiara et al., Nature, 2018
684	http://1002genomes.u-strasbg.fr/files/	NA	CLQCA_20-259	CCGOSW	Fruit	Yasuni, Orellana	2	SouthAmericaMix1	Peter and De Chiara et al., Nature, 2018
685	http://1002genomes.u-strasbg.fr/files/	NA	CLQCA_20-314	CCHOSW	Insect	Yasuni, Orellana	2	SouthAmericaMix1	Peter and De Chiara et al., Nature, 2018
686	http://1002genomes.u-strasbg.fr/files/	NA	CLQCA_20-248	CCIOSW	Insect	Yasuni, Orellana	2	SouthAmericaMix1	Peter and De Chiara et al., Nature, 2018
687	http://1002genomes.u-strasbg.fr/files/	NA	N19-1C	CCLOSW	Tree	Gelendzhik region, Caucasus, Russia	2	MedOak	Peter and De Chiara et al., Nature, 2018
688	http://1002genomes.u-strasbg.fr/files/	NA	N493-2C	CCMOSW	Tree	Kiev district, Ukraine	2	WineEuropean1	Peter and De Chiara et al., Nature, 2018
689	http://1002genomes.u-strasbg.fr/files/	NA	VKM_Y-504:S	CCNOSW	Fruit	Russian Far East	2	CHN-IV	Peter and De Chiara et al., Nature, 2018
690	http://1002genomes.u-strasbg.fr/files/	NA	IFO_0877:6-1	CCPOSW	Tree	Japan	2	Other	Peter and De Chiara et al., Nature, 2018
691	http://1002genomes.u-strasbg.fr/files/	NA	Ksc2-2B	CCQOSW	Tree	Japan	2	CHN-IV	Peter and De Chiara et al., Nature, 2018
692	http://1002genomes.u-strasbg.fr/files/	NA	Ksc40-8A	CCROSW	Tree	Japan	2	CHN-IV	Peter and De Chiara et al., Nature, 2018
693	http://1002genomes.u-strasbg.fr/files/	NA	Ksc73-2D	CCSOSW	Tree	Japan	2	CHN-IV	Peter and De Chiara et al., Nature, 2018
694	http://1002genomes.u-strasbg.fr/files/	NA	S11F3-6B	CCTOSW	Tree	Sri Lanka	2	AsianIsland	Peter and De Chiara et al., Nature, 2018
695	http://1002genomes.u-strasbg.fr/files/	NA	S8BM-30-2D	CCVOSW	Tree	Sri Lanka	2	AsianIsland	Peter and De Chiara et al., Nature, 2018
696	http://1002genomes.u-strasbg.fr/files/	NA	S8BM-32-4D(a)	CDAOSW	Tree	Sri Lanka	1	AsianIsland	Peter and De Chiara et al., Nature, 2018
697	http://1002genomes.u-strasbg.fr/files/	NA	ATCC_66348-1D	CDBOSW	Soil	Japan	2	Other	Peter and De Chiara et al., Nature, 2018
698	http://1002genomes.u-strasbg.fr/files/	NA	N37-1A	CDCOSW	Tree	Botanical Garden, Novosibirsk, Siberia, Russia	2	MosaicsR3	Peter and De Chiara et al., Nature, 2018
699	http://1002genomes.u-strasbg.fr/files/	NA	N38-4A	CDDOSW	Tree	Botanical Garden, Novosibirsk, Siberia, Russia	2	MosaicsR3	Peter and De Chiara et al., Nature, 2018
700	http://1002genomes.u-strasbg.fr/files/	NA	N39-7A	CDEOSW	Tree	Novosibirsk, Siberia, Russia	2	MosaicsR3	Peter and De Chiara et al., Nature, 2018
701	http://1002genomes.u-strasbg.fr/files/	NA	N22.00-5D	CDFOSW	Fruit	Botanical garden, Blagoveshchensk, Russia	2	FarEastRussian	Peter and De Chiara et al., Nature, 2018
702	http://1002genomes.u-strasbg.fr/files/	NA	N3.00-7A	CDGOSW	Wine	Botanical garden, Blagoveshchensk, Russia	2	FarEastRussian	Peter and De Chiara et al., Nature, 2018
703	http://1002genomes.u-strasbg.fr/files/	NA	N159.01-2B	CDHOSW	Tree	Botanical garden, Blagoveshchensk, Russia	2	FarEastRussian	Peter and De Chiara et al., Nature, 2018
704	http://1002genomes.u-strasbg.fr/files/	NA	N163.01-5A	CDIOSW	Tree	Botanical garden, Blagoveshchensk, Russia	2	FarEastRussian	Peter and De Chiara et al., Nature, 2018
705	http://1002genomes.u-strasbg.fr/files/	NA	CCY_21-4-93:6B	CDKOSW	Tree	North Korea	1	MosaicsR3	Peter and De Chiara et al., Nature, 2018
706	http://1002genomes.u-strasbg.fr/files/	NA	N51-1A	CDLOSW	Tree	Vladivostok, Russian Far East	2	CHN-IV	Peter and De Chiara et al., Nature, 2018
707	http://1002genomes.u-strasbg.fr/files/	NA	UFRJ_50613-2D(a)	CDMOSW	Water	Rio de Janeiro, Brazil	2	MosaicsR2	Peter and De Chiara et al., Nature, 2018
708	http://1002genomes.u-strasbg.fr/files/	NA	UCD_61-190-6A	CDNOSW	Insect	California, USA	2	Other	Peter and De Chiara et al., Nature, 2018
709	http://1002genomes.u-strasbg.fr/files/	NA	N95-5-1A	CDPOSW	Tree	Augusta, MI 49012, USA	2	NorthAmerican	Peter and De Chiara et al., Nature, 2018
710	http://1002genomes.u-strasbg.fr/files/	NA	N95-6-1C	CDQOSW	Tree	Augusta, MI 49012, USA	2	NorthAmerican	Peter and De Chiara et al., Nature, 2018
711	http://1002genomes.u-strasbg.fr/files/	NA	CECT10331:9-1	CDROSW	Flower	Spain	2	MixOrigin	Peter and De Chiara et al., Nature, 2018
712	http://1002genomes.u-strasbg.fr/files/	NA	CECT10351-1B	CDSOSW	Fruit	Spain	2	WineEuropean	Peter and De Chiara et al., Nature, 2018
713	http://1002genomes.u-strasbg.fr/files/	NA	CECT10171-5B	CDTOSW	Insect	Spain	2	Alpechin	Peter and De Chiara et al., Nature, 2018
714	http://1002genomes.u-strasbg.fr/files/	NA	DBVPG1616-1D	CDVOSW	Soil	Spain	2	WineEuropean	Peter and De Chiara et al., Nature, 2018
715	http://1002genomes.u-strasbg.fr/files/	NA	DBVPG1617-5A	CEAOSW	Soil	Spain	1	WineEuropean	Peter and De Chiara et al., Nature, 2018
716	http://1002genomes.u-strasbg.fr/files/	NA	DBVPG1619-4B	CEBOSW	Soil	Spain	1	WineEuropean	Peter and De Chiara et al., Nature, 2018
717	http://1002genomes.u-strasbg.fr/files/	NA	DBVPG1620-1A	CECOSW	Soil	Spain	2	WineEuropean	Peter and De Chiara et al., Nature, 2018
718	http://1002genomes.u-strasbg.fr/files/	NA	DBVPG1621-5A	CEDOSW	Soil	Spain	2	WineEuropean	Peter and De Chiara et al., Nature, 2018
719	http://1002genomes.u-strasbg.fr/files/	NA	DBVPG1622-8B	CEEOSW	Soil	Spain	2	WineEuropean	Peter and De Chiara et al., Nature, 2018
720	http://1002genomes.u-strasbg.fr/files/	NA	DBVPG1623-2A	CEFOSW	Soil	Spain	2	WineEuropean	Peter and De Chiara et al., Nature, 2018
721	http://1002genomes.u-strasbg.fr/files/	NA	EM14S01-3B	CEGOSW	Soil	Taiwan	2	CHN-IX	Naumov et al., A.v.l., 2012
722	http://1002genomes.u-strasbg.fr/files/	NA	ES2M03-7A	CEHOSW	Fruit	Taiwan	2	CHN-VI	Peter and De Chiara et al., Nature, 2018
723	http://1002genomes.u-strasbg.fr/files/	NA	GE14S01-7B	CEIOSW	Soil	Taiwan	2	CHN-IX	Naumov et al., A.v.l., 2012
724	http://1002genomes.u-strasbg.fr/files/	NA	JCM_2985-4B	CEKOSW	Fermentation	Tailand	2	AsianFermentation	Peter and De Chiara et al., Nature, 2018
725	http://1002genomes.u-strasbg.fr/files/	NA	JCM_3529-7B	CELOSW	Fermentation	Tailand	2	AsianFermentation	Peter and De Chiara et al., Nature, 2018
726	http://1002genomes.u-strasbg.fr/files/	NA	CCY_21-4-89:7-3	CEMOSW	Fermentation	North Korea	1	MosaicsR3	Peter and De Chiara et al., Nature, 2018
727	http://1002genomes.u-strasbg.fr/files/	NA	ATCC_38618:2-2	CENOSW	Fruit	NA	2	MosaicsR3	Peter and De Chiara et al., Nature, 2018
728	http://1002genomes.u-strasbg.fr/files/	NA	ATCC_52922-1C	CEPOSW	Fermentation	Philippines	2	Other	Peter and De Chiara et al., Nature, 2018
729	http://1002genomes.u-strasbg.fr/files/	NA	MUCL_30909-2C	CEQOSW	Fermentation	Burundi	2	MosaicsR3	Peter and De Chiara et al., Nature, 2018
730	http://1002genomes.u-strasbg.fr/files/	NA	N34:2-4(a)	CEROSW	Bakery	Ghana	2	AfricanBeer	Peter and De Chiara et al., Nature, 2018
731	http://1002genomes.u-strasbg.fr/files/	NA	N26-1-10:7-5(a)	CESOSW	Bakery	Ghana	2	AfricanBeer	Peter and De Chiara et al., Nature, 2018
732	http://1002genomes.u-strasbg.fr/files/	NA	N134:7-1(a)	CETOSW	Bakery	Ghana	2	AfricanBeer	Peter and De Chiara et al., Nature, 2018
733	http://1002genomes.u-strasbg.fr/files/	NA	IFO_0289:4-3(b)	CEVOSW	Distillery	China	1	Mantou7	Peter and De Chiara et al., Nature, 2018
734	http://1002genomes.u-strasbg.fr/files/	NA	Dji2-2A(a)	CFAOSW	Palm wine	Djibouti	2	AfricanPalmWine	Peter and De Chiara et al., Nature, 2018
735	http://1002genomes.u-strasbg.fr/files/	NA	ho_SB	CFBOSW	Wine	Bordeaux	2	WineEuropean	Peter and De Chiara et al., Nature, 2018
736	http://1002genomes.u-strasbg.fr/files/	NA	4.5_WLP530	CFCOSW	Beer	Westmalle, Belgium	4	Beer	Peter and De Chiara et al., Nature, 2018
737	http://1002genomes.u-strasbg.fr/files/	NA	1.3_Safale_US05	CFDOSW	Beer	USA	4	Beer	Peter and De Chiara et al., Nature, 2018
738	http://1002genomes.u-strasbg.fr/files/	NA	4.9_WLP099	CFEOSW	Beer	United Kingdom	2	WineEuropean	Peter and De Chiara et al., Nature, 2018
739	http://1002genomes.u-strasbg.fr/files/	NA	6.2_WLP570	CFFOSW	Beer	Belgium	2	MosaicsBeer	Peter and De Chiara et al., Nature, 2018
740	http://1002genomes.u-strasbg.fr/files/	NA	1.6_Safale_S40	CFGOSW	Beer	UK	4	Beer	Peter and De Chiara et al., Nature, 2018
741	http://1002genomes.u-strasbg.fr/files/	NA	Nottingham_ale_1.8_Lallemand	CFHOSW	Beer	UK	4	Beer	Peter and De Chiara et al., Nature, 2018
742	http://1002genomes.u-strasbg.fr/files/	NA	2.6_Windsor_British	CFIOSW	Beer	UK	4	MixOrigin	Peter and De Chiara et al., Nature, 2018
743	http://1002genomes.u-strasbg.fr/files/	NA	5.5_WLP090	CFMOSW	Beer	San Diego, USA	4	Beer	Peter and De Chiara et al., Nature, 2018
744	http://1002genomes.u-strasbg.fr/files/	NA	3.3_Safale_S-33	CFNOSW	Beer	NA	4	MixOrigin	Peter and De Chiara et al., Nature, 2018
745	http://1002genomes.u-strasbg.fr/files/	NA	3.4_Safbrew_T-58	CFPOSW	Beer	NA	4	MixOrigin	Peter and De Chiara et al., Nature, 2018
746	http://1002genomes.u-strasbg.fr/files/	NA	UCD_40-235	CFQOSW	Wine	Walnut Creek, California	2	WineEuropean	Peter and De Chiara et al., Nature, 2018
747	http://1002genomes.u-strasbg.fr/files/	NA	UCD_40-248	CFROSW	Wine	Tulare Winery, California	2	WineEuropean	Peter and De Chiara et al., Nature, 2018
748	http://1002genomes.u-strasbg.fr/files/	NA	UCD_40-255	CFSOSW	Wine	Walnut Creek, California	4	WineEuropean	Peter and De Chiara et al., Nature, 2018
749	http://1002genomes.u-strasbg.fr/files/	NA	UCD_40-346	CFTOSW	Fruit	Fresno area, California	2	MosaicsR2	Peter and De Chiara et al., Nature, 2018
750	http://1002genomes.u-strasbg.fr/files/	NA	UCD_40-49	CFVOSW	Fruit	NA	2	WineEuropean	Peter and De Chiara et al., Nature, 2018
751	http://1002genomes.u-strasbg.fr/files/	NA	UCD_05-780	CGBOSW	Insect	Winters, CA Wolfskill USDA Prunus germplasm collection,	2	MosaicsR3	Peter and De Chiara et al., Nature, 2018
752	http://1002genomes.u-strasbg.fr/files/	NA	UCD_06-645	CGCOSW	Fruit	Davis, CA, UCD	4	Beer	Peter and De Chiara et al., Nature, 2018
753	http://1002genomes.u-strasbg.fr/files/	NA	UCD_09-448	CGDOSW	Fruit	Davis, CA, UCD	2	Alpechin	Peter and De Chiara et al., Nature, 2018
754	http://1002genomes.u-strasbg.fr/files/	NA	UCD_11-601	CGEOSW	Fruit	Davis, CA, UCD Food Science, Pilot plant.	2	Alpechin	Peter and De Chiara et al., Nature, 2018
755	http://1002genomes.u-strasbg.fr/files/	NA	TayTa	CGGOSW	Unknown	Long An, South Vietnam	2	AsianFermentation	Peter and De Chiara et al., Nature, 2018
756	http://1002genomes.u-strasbg.fr/files/	NA	VNL3	CGHOSW	Unknown	Ha Noi, North Vietnam	3	Other	Peter and De Chiara et al., Nature, 2018
757	http://1002genomes.u-strasbg.fr/files/	NA	Me7	CGIOSW	Unknown	Cai Be, South Vietnam	2	AsianFermentation	Peter and De Chiara et al., Nature, 2018
758	http://1002genomes.u-strasbg.fr/files/	NA	Lx2	CGKOSW	Unknown	Dong Thap, South Vietnam	2	Huangjiu	Peter and De Chiara et al., Nature, 2018
759	http://1002genomes.u-strasbg.fr/files/	NA	BMQ557	CGLOSW	Unknown	Hai Phong, North Vietnam	2	Mantou7	Peter and De Chiara et al., Nature, 2018
760	http://1002genomes.u-strasbg.fr/files/	NA	SGB1	CGNOSW	Fermentation	Saigon, South Vietnam	2	AsianFermentation	Peter and De Chiara et al., Nature, 2018
761	http://1002genomes.u-strasbg.fr/files/	NA	SG4	CGPOSW	Unknown	Saigon, South Vietnam	2	AsianFermentation	Peter and De Chiara et al., Nature, 2018
762	http://1002genomes.u-strasbg.fr/files/	NA	RR1a	CGQOSW	Unknown	My Tho, South Vietnam	2	Huangjiu	Peter and De Chiara et al., Nature, 2018
763	http://1002genomes.u-strasbg.fr/files/	NA	VL5	CGROSW	Fermentation	Phan Thiet, South Vietnam	2	AsianFermentation	Peter and De Chiara et al., Nature, 2018
764	http://1002genomes.u-strasbg.fr/files/	NA	Ca6	CGSOSW	Wine	Lebanon	2	WineEuropean	Peter and De Chiara et al., Nature, 2018
765	http://1002genomes.u-strasbg.fr/files/	NA	Lib39	CGTOSW	Wine	Lebanon	2	WineEuropean	Peter and De Chiara et al., Nature, 2018
766	http://1002genomes.u-strasbg.fr/files/	NA	Lib51	CGVOSW	Wine	Lebanon	2	WineEuropean	Peter and De Chiara et al., Nature, 2018
767	http://1002genomes.u-strasbg.fr/files/	NA	Lib52	CHAOSW	Wine	Lebanon	2	WineEuropean	Peter and De Chiara et al., Nature, 2018
768	http://1002genomes.u-strasbg.fr/files/	NA	Lib54	CHBOSW	Wine	Lebanon	2	WineEuropean	Peter and De Chiara et al., Nature, 2018
769	http://1002genomes.u-strasbg.fr/files/	NA	Lib61	CHCOSW	Wine	Lebanon	2	WineEuropean	Peter and De Chiara et al., Nature, 2018
770	http://1002genomes.u-strasbg.fr/files/	NA	Lib70	CHDOSW	Wine	Lebanon	2	WineEuropean	Peter and De Chiara et al., Nature, 2018
771	http://1002genomes.u-strasbg.fr/files/	NA	Lib71	CHEOSW	Wine	Lebanon	2	WineEuropean	Peter and De Chiara et al., Nature, 2018
772	http://1002genomes.u-strasbg.fr/files/	NA	Lib73	CHFOSW	Wine	Lebanon	2	WineEuropean	Peter and De Chiara et al., Nature, 2018
773	http://1002genomes.u-strasbg.fr/files/	NA	324-6C	CHGOSW	Bakery	Vietnam	2	MixOrigin	Peter and De Chiara et al., Nature, 2018
774	http://1002genomes.u-strasbg.fr/files/	NA	319-5C	CHHOSW	Bakery	France	2	MixOrigin	Peter and De Chiara et al., Nature, 2018
775	http://1002genomes.u-strasbg.fr/files/	NA	646-3B	CHIOSW	Bakery	USA	2	MixOrigin	Peter and De Chiara et al., Nature, 2018
776	http://1002genomes.u-strasbg.fr/files/	NA	Win-8B	CHKOSW	Beer	UK	2	MixOrigin	Peter and De Chiara et al., Nature, 2018
777	http://1002genomes.u-strasbg.fr/files/	NA	SBE-1C	CHLOSW	Bakery	Northern Europe	2	MixOrigin	Peter and De Chiara et al., Nature, 2018
778	http://1002genomes.u-strasbg.fr/files/	NA	SBD	CHMOSW	Bakery	Northern Europe	2	Huangjiu	Peter and De Chiara et al., Nature, 2018
779	http://1002genomes.u-strasbg.fr/files/	NA	B9b-1	CHNOSW	Bakery	Gif-sur-Yvette	2	MosaicsR3	Peter and De Chiara et al., Nature, 2018
780	http://1002genomes.u-strasbg.fr/files/	NA	B9c-1	CHPOSW	Bakery	Gif-sur-Yvette	2	MosaicsR3	Peter and De Chiara et al., Nature, 2018
781	http://1002genomes.u-strasbg.fr/files/	NA	B10-1	CHQOSW	Bakery	Forcalquier	2	MosaicsR3	Peter and De Chiara et al., Nature, 2018
782	http://1002genomes.u-strasbg.fr/files/	NA	SC 29 F. Dromer IP	CHROSW	Human, clinical	France	2	MixOrigin	Peter and De Chiara et al., Nature, 2018
783	http://1002genomes.u-strasbg.fr/files/	NA	SC 32 F. Dromer IP	CHSOSW	Human, clinical	France	2	MosaicsR3	Peter and De Chiara et al., Nature, 2018
784	http://1002genomes.u-strasbg.fr/files/	NA	SC 33 F. Dromer IP	CHTOSW	Human, clinical	France	2	MosaicsR3	Peter and De Chiara et al., Nature, 2018
785	http://1002genomes.u-strasbg.fr/files/	NA	SRC 120	CHVOSW	Cider	France	2	MosaicsR1	Peter and De Chiara et al., Nature, 2018
786	http://1002genomes.u-strasbg.fr/files/	NA	SRC 147	CIAOSW	Industrial	Bretagne, France	2	WineEuropean	Peter and De Chiara et al., Nature, 2018
787	http://1002genomes.u-strasbg.fr/files/	NA	SRC 213	CIBOSW	Industrial	Bretagne, France	2	WineEuropean	Peter and De Chiara et al., Nature, 2018
788	http://1002genomes.u-strasbg.fr/files/	NA	Ponton 11	CICOSW	Human, clinical	Spain	2	MosaicsR3	Peter and De Chiara et al., Nature, 2018
789	http://1002genomes.u-strasbg.fr/files/	NA	Ponton 12	CIDOSW	Human, clinical	Spain	2	MosaicsR3	Peter and De Chiara et al., Nature, 2018
790	http://1002genomes.u-strasbg.fr/files/	NA	Ponton 13	CIEOSW	Human, clinical	Spain	3	MixOrigin	Peter and De Chiara et al., Nature, 2018
791	http://1002genomes.u-strasbg.fr/files/	NA	Ponton 14	CIFOSW	Human, clinical	Spain	2	MosaicsR3	Peter and De Chiara et al., Nature, 2018
792	http://1002genomes.u-strasbg.fr/files/	NA	PB11	CIGOSW	Human, clinical	Netherlands	2	MosaicsR3	Peter and De Chiara et al., Nature, 2018
793	http://1002genomes.u-strasbg.fr/files/	NA	PB12	CIHOSW	Human, clinical	Netherlands	2	MosaicsR3	Peter and De Chiara et al., Nature, 2018
794	http://1002genomes.u-strasbg.fr/files/	NA	PB13	CIIOSW	Human, clinical	Netherlands	2	MosaicsR3	Peter and De Chiara et al., Nature, 2018
795	http://1002genomes.u-strasbg.fr/files/	NA	PB14	CIKOSW	Human, clinical	Netherlands	2	MosaicsR3	Peter and De Chiara et al., Nature, 2018
796	http://1002genomes.u-strasbg.fr/files/	NA	PB15	CILOSW	Human, clinical	Netherlands	2	MosaicsR3	Peter and De Chiara et al., Nature, 2018
797	http://1002genomes.u-strasbg.fr/files/	NA	malade Hc6553	CIMOSW	Human, clinical	Paris, France, H6	2	WineEuropean3	Peter and De Chiara et al., Nature, 2018
798	http://1002genomes.u-strasbg.fr/files/	NA	malade Pac6436	CINOSW	Human, clinical	Paris, France, H6	2	WineEuropean3	Peter and De Chiara et al., Nature, 2018
799	http://1002genomes.u-strasbg.fr/files/	NA	malade 6442	CIPOSW	Human, clinical	Paris, France, H6	2	WineEuropean3	Peter and De Chiara et al., Nature, 2018
800	http://1002genomes.u-strasbg.fr/files/	NA	malade 6452	CIQOSW	Human, clinical	Paris, France, H6	2	WineEuropean3	Peter and De Chiara et al., Nature, 2018
801	http://1002genomes.u-strasbg.fr/files/	NA	malade 6441	CIROSW	Human, clinical	Paris, France, H6	2	WineEuropean3	Peter and De Chiara et al., Nature, 2018
802	http://1002genomes.u-strasbg.fr/files/	NA	malade Elbaz 6766	CISOSW	Human, clinical	Paris, France, H6	2	WineEuropean3	Peter and De Chiara et al., Nature, 2018
803	http://1002genomes.u-strasbg.fr/files/	NA	malade 459 Labaume	CITOSW	Human, clinical	Paris, France, H1	2	WineEuropean3	Peter and De Chiara et al., Nature, 2018
804	http://1002genomes.u-strasbg.fr/files/	NA	malade 1124/150017	CIVOSW	Human, clinical	Paris, France, H2	2	WineEuropean3	Peter and De Chiara et al., Nature, 2018
805	http://1002genomes.u-strasbg.fr/files/	NA	malade 3285/11-2-4	CKAOSW	Human, clinical	Paris, France, H3	2	MosaicsR3	Peter and De Chiara et al., Nature, 2018
806	http://1002genomes.u-strasbg.fr/files/	NA	malade 98 1655/125391	CKBOSW	Human, clinical	Paris, France, H3	2	WineEuropean3	Peter and De Chiara et al., Nature, 2018
807	http://1002genomes.u-strasbg.fr/files/	NA	malade 139287/11_2_1	CKCOSW	Human, clinical	Paris, France, H2	2	WineEuropean3	Peter and De Chiara et al., Nature, 2018
808	http://1002genomes.u-strasbg.fr/files/	NA	malade 97 138633/11-2-5	CKDOSW	Human, clinical	Paris, France, H2	2	WineEuropean3	Peter and De Chiara et al., Nature, 2018
809	http://1002genomes.u-strasbg.fr/files/	NA	malade 141076/11210	CKEOSW	Human, clinical	Paris, France, H2	2	WineEuropean3	Peter and De Chiara et al., Nature, 2018
810	http://1002genomes.u-strasbg.fr/files/	NA	malade 150865/1122	CKFOSW	Human, clinical	Paris, France, H2	2	WineEuropean3	Peter and De Chiara et al., Nature, 2018
811	http://1002genomes.u-strasbg.fr/files/	NA	UL G84F88I90	CKGOSW	Fruit	Vietnam	2	WineEuropean3	Peter and De Chiara et al., Nature, 2018
812	http://1002genomes.u-strasbg.fr/files/	NA	ultra lev. 1127	CKHOSW	Industrial	Paris, France	2	WineEuropean3	Peter and De Chiara et al., Nature, 2018
813	http://1002genomes.u-strasbg.fr/files/	NA	perentol	CKIOSW	Human, clinical	Brussels, Belgium	2	WineEuropean3	Peter and De Chiara et al., Nature, 2018
814	http://1002genomes.u-strasbg.fr/files/	NA	malade 98 3312	CKKOSW	Human, clinical	Amiens, France	4	MixOrigin	Peter and De Chiara et al., Nature, 2018
815	http://1002genomes.u-strasbg.fr/files/	NA	malade 98 3161	CKLOSW	Human, clinical	Amiens, France	2	WineEuropean3	Peter and De Chiara et al., Nature, 2018
816	http://1002genomes.u-strasbg.fr/files/	NA	malade 98 2574	CKMOSW	Human, clinical	Amiens, France	2	WineEuropean3	Peter and De Chiara et al., Nature, 2018
817	http://1002genomes.u-strasbg.fr/files/	NA	malade 98 2601	CKNOSW	Human, clinical	Amiens, France	2	MosaicsR3	Peter and De Chiara et al., Nature, 2018
818	http://1002genomes.u-strasbg.fr/files/	NA	malade Broussais	CKPOSW	Human, clinical	Paris, France	2	WineEuropean3	Peter and De Chiara et al., Nature, 2018
819	http://1002genomes.u-strasbg.fr/files/	NA	malade M2402A Necker	CKQOSW	Human, clinical	France	2	WineEuropean3	Peter and De Chiara et al., Nature, 2018
820	http://1002genomes.u-strasbg.fr/files/	NA	malade Darkman	CKROSW	Human, clinical	France	2	Other	Peter and De Chiara et al., Nature, 2018
821	http://1002genomes.u-strasbg.fr/files/	NA	malade Berchid	CKSOSW	Human, clinical	France	4	MixOrigin	Peter and De Chiara et al., Nature, 2018
822	http://1002genomes.u-strasbg.fr/files/	NA	malade Fauot	CKTOSW	Human, clinical	France	2	WineEuropean3	Peter and De Chiara et al., Nature, 2018
823	http://1002genomes.u-strasbg.fr/files/	NA	malade Boisse	CKVOSW	Human, clinical	France	2	DairyProducts	Peter and De Chiara et al., Nature, 2018
824	http://1002genomes.u-strasbg.fr/files/	NA	malade Moreau	CLAOSW	Human, clinical	France	4	MixOrigin	Peter and De Chiara et al., Nature, 2018
825	http://1002genomes.u-strasbg.fr/files/	NA	sample 40	CLBOSW	Tree	Bordeaux, France	2	MedOak	Peter and De Chiara et al., Nature, 2018
826	http://1002genomes.u-strasbg.fr/files/	NA	sample 50	CLCOSW	Tree	Bordeaux, France	2	MedOak	Peter and De Chiara et al., Nature, 2018
827	http://1002genomes.u-strasbg.fr/files/	NA	sample 33	CLDOSW	Flower	Bordeaux, France	2	MedOak	Peter and De Chiara et al., Nature, 2018
828	http://1002genomes.u-strasbg.fr/files/	NA	NCYC_2966	CLGOSW	Human, clinical	Nottingham, UK	2	MosaicsR3	Peter and De Chiara et al., Nature, 2018
829	http://1002genomes.u-strasbg.fr/files/	NA	NCYC_2743	CLHOSW	Wine	Spain	2	WineEuropean	Peter and De Chiara et al., Nature, 2018
830	http://1002genomes.u-strasbg.fr/files/	NA	K5	CLIOSW	Sake	Japan	2	Sake-A	Fay et al., Plos Gen, 2005
831	http://1002genomes.u-strasbg.fr/files/	NA	K9	CLKOSW	Sake	Japan	2	Sake-B	Fay et al., Plos Gen, 2005
832	http://1002genomes.u-strasbg.fr/files/	NA	K10	CLLOSW	Sake	Japan	2	Sake-B	Fay et al., Plos Gen, 2005
833	http://1002genomes.u-strasbg.fr/files/	NA	K13	CLMOSW	Sake	Japan	2	Sake-A	Fay et al., Plos Gen, 2005
834	http://1002genomes.u-strasbg.fr/files/	NA	K14	CLNOSW	Sake	Japan	2	Sake-A	Fay et al., Plos Gen, 2005
835	http://1002genomes.u-strasbg.fr/files/	NA	K15	CLPOSW	Sake	Japan	2	Sake-B	Fay et al., Plos Gen, 2005
836	http://1002genomes.u-strasbg.fr/files/	NA	UC5	CLQOSW	Sake	Japan	1	Sake-A	Fay et al., Plos Gen, 2005
837	http://1002genomes.u-strasbg.fr/files/	NA	RIB1008	CLROSW	Sake	Japan	2	Sake-B	Peter and De Chiara et al., Nature, 2018
838	http://1002genomes.u-strasbg.fr/files/	NA	RIB1010	CLSOSW	Sake	Japan	2	Sake-B	Peter and De Chiara et al., Nature, 2018
839	http://1002genomes.u-strasbg.fr/files/	NA	RIB1011	CLTOSW	Sake	Japan	2	Sake-B	Peter and De Chiara et al., Nature, 2018
840	http://1002genomes.u-strasbg.fr/files/	NA	RIB1012	CLVOSW	Sake	Japan	2	Sake-B	Peter and De Chiara et al., Nature, 2018
841	http://1002genomes.u-strasbg.fr/files/	NA	RIB1014	CMBOSW	Sake	Japan	2	Sake-B	Peter and De Chiara et al., Nature, 2018
842	http://1002genomes.u-strasbg.fr/files/	NA	RIB1015	CMCOSW	Sake	Japan	2	Sake-B	Peter and De Chiara et al., Nature, 2018
843	http://1002genomes.u-strasbg.fr/files/	NA	RIB1016	CMDOSW	Sake	Japan	2	Sake-B	Peter and De Chiara et al., Nature, 2018
844	http://1002genomes.u-strasbg.fr/files/	NA	RIB1017	CMEOSW	Sake	Japan	2	Sake-B	Peter and De Chiara et al., Nature, 2018
845	http://1002genomes.u-strasbg.fr/files/	NA	RIB6001	CMFOSW	Sake	Japan	2	Sake-A	Peter and De Chiara et al., Nature, 2018
846	http://1002genomes.u-strasbg.fr/files/	NA	RIB6002	CMGOSW	Sake	Japan	3	MosaicsR3	Peter and De Chiara et al., Nature, 2018
847	http://1002genomes.u-strasbg.fr/files/	NA	RIB6003	CMHOSW	Sake	Japan	2	Sake-A	Peter and De Chiara et al., Nature, 2018
848	http://1002genomes.u-strasbg.fr/files/	NA	RIB6004	CMIOSW	Sake	Japan	2	Sake-A	Peter and De Chiara et al., Nature, 2018
849	http://1002genomes.u-strasbg.fr/files/	NA	RIB6005	CMKOSW	Sake	Japan	2	Sake-A	Peter and De Chiara et al., Nature, 2018
850	http://1002genomes.u-strasbg.fr/files/	NA	RIB6006	CMLOSW	Sake	Japan	2	Sake-B	Peter and De Chiara et al., Nature, 2018
851	http://1002genomes.u-strasbg.fr/files/	NA	RIB6007	CMMOSW	Sake	Japan	2	Sake-B	Peter and De Chiara et al., Nature, 2018
852	http://1002genomes.u-strasbg.fr/files/	NA	RIB0007	CMNOSW	Sake	Japan	2	Sake-A	Peter and De Chiara et al., Nature, 2018
853	http://1002genomes.u-strasbg.fr/files/	NA	YPS615	CMPOSW	Tree	Pennsylvania, USA	2	SouthAmericaMix1	Peter and De Chiara et al., Nature, 2018
854	http://1002genomes.u-strasbg.fr/files/	NA	YPS617	CMQOSW	Tree	Pennsylvania, USA	2	SouthAmericaMix1	Peter and De Chiara et al., Nature, 2018
855	http://1002genomes.u-strasbg.fr/files/	NA	YPS670	CMSOSW	Tree	Pennsylvania, USA	2	NorthAmerican	Peter and De Chiara et al., Nature, 2018
856	http://1002genomes.u-strasbg.fr/files/	NA	SM.9.4.BR2	CMTOSW	Bioethanol	Brazil	2	Bioethanol	Antonangelo et al., Yeast, 2013
857	http://1002genomes.u-strasbg.fr/files/	NA	SM.8.2.C13	CNBOSW	Bioethanol	Brazil	2	Bioethanol	Antonangelo et al., Yeast, 2013
858	http://1002genomes.u-strasbg.fr/files/	NA	SM8.3.M5	CNCOSW	Bioethanol	Brazil	2	MosaicsR3	Antonangelo et al., Yeast, 2013
859	http://1002genomes.u-strasbg.fr/files/	NA	SM.8.7.L8	CNEOSW	Bioethanol	Brazil	2	Bioethanol	Antonangelo et al., Yeast, 2013
860	http://1002genomes.u-strasbg.fr/files/	NA	SM.8.7.L9	CNFOSW	Bioethanol	Brazil	2	Bioethanol	Antonangelo et al., Yeast, 2013
861	http://1002genomes.u-strasbg.fr/files/	NA	SM.8.7.BR1	CNGOSW	Bioethanol	Brazil	2	Bioethanol	Antonangelo et al., Yeast, 2013
862	http://1002genomes.u-strasbg.fr/files/	NA	SM.8.8.BL1	CNHOSW	Bioethanol	Brazil	2	Bioethanol	Antonangelo et al., Yeast, 2013
863	http://1002genomes.u-strasbg.fr/files/	NA	SM.8.8.CVR1	CNIOSW	Bioethanol	Brazil	2	Bioethanol	Antonangelo et al., Yeast, 2013
864	http://1002genomes.u-strasbg.fr/files/	NA	SA.1.5.	CNKOSW	Bioethanol	Brazil	2	Bioethanol	Antonangelo et al., Yeast, 2013
865	http://1002genomes.u-strasbg.fr/files/	NA	SA.9.2.BL3	CNLOSW	Bioethanol	Brazil	2	Bioethanol	Antonangelo et al., Yeast, 2013
866	http://1002genomes.u-strasbg.fr/files/	NA	SA.9.3.VR1	CNMOSW	Bioethanol	Brazil	2	Bioethanol	Antonangelo et al., Yeast, 2013
867	http://1002genomes.u-strasbg.fr/files/	NA	SA.9.4.VL4	CNNOSW	Bioethanol	Brazil	2	Bioethanol	Antonangelo et al., Yeast, 2013
868	http://1002genomes.u-strasbg.fr/files/	NA	SA.9.4.BR2	CNPOSW	Bioethanol	Brazil	2	Bioethanol	Antonangelo et al., Yeast, 2013
869	http://1002genomes.u-strasbg.fr/files/	NA	SA.10.1.VL1	CNQOSW	Bioethanol	Brazil	2	Bioethanol	Antonangelo et al., Yeast, 2013
870	http://1002genomes.u-strasbg.fr/files/	NA	SA.10.1.VR4	CNROSW	Bioethanol	Brazil	2	Bioethanol	Antonangelo et al., Yeast, 2013
871	http://1002genomes.u-strasbg.fr/files/	NA	RP11.4.1	CNSOSW	Bioethanol	Brazil	2	Bioethanol	Antonangelo et al., Yeast, 2013
872	http://1002genomes.u-strasbg.fr/files/	NA	RP11.4.11	CNTOSW	Bioethanol	Brazil	2	Bioethanol	Antonangelo et al., Yeast, 2013
873	http://1002genomes.u-strasbg.fr/files/	NA	RP11.4.14	CNVOSW	Bioethanol	Brazil	2	Bioethanol	Antonangelo et al., Yeast, 2013
874	http://1002genomes.u-strasbg.fr/files/	NA	906	CPAOSW	Nature	Mexico	2	SouthAmericaMix2	Peter and De Chiara et al., Nature, 2018
875	http://1002genomes.u-strasbg.fr/files/	NA	995	CPBOSW	Beer	Hungary	2	MosaicsR1	Peter and De Chiara et al., Nature, 2018
876	http://1002genomes.u-strasbg.fr/files/	NA	997	CPCOSW	Fruit	Hungary	2	MosaicsR3	Peter and De Chiara et al., Nature, 2018
877	http://1002genomes.u-strasbg.fr/files/	NA	1175	CPDOSW	Beer	NA	2	MosaicsBeer	Peter and De Chiara et al., Nature, 2018
878	http://1002genomes.u-strasbg.fr/files/	NA	1216	CPEOSW	Unknown	El Sauzal, Tenerife, Spain	2	WineEuropean	Peter and De Chiara et al., Nature, 2018
879	http://1002genomes.u-strasbg.fr/files/	NA	1235	CPFOSW	Unknown	Guimar, Tenerife, Spain	2	WineEuropean	Peter and De Chiara et al., Nature, 2018
880	http://1002genomes.u-strasbg.fr/files/	NA	1560	CPGOSW	Nature	Aceituna, Spain	2	Alpechin	Peter and De Chiara et al., Nature, 2018
881	http://1002genomes.u-strasbg.fr/files/	NA	LCBG-3D6	CPIOSW	Distillery	Tamaulipas, Mexico	2	MexicanAgave	Hernández et al., A.v.l, 2012
882	http://1002genomes.u-strasbg.fr/files/	NA	LCBG-Mosca3	CPKOSW	Distillery	Tamaulipas, Mexico	2	MexicanAgave	Peter and De Chiara et al., Nature, 2018
883	http://1002genomes.u-strasbg.fr/files/	NA	LCBG-4Y3	CPLOSW	Distillery	Tamaulipas, Mexico	2	MexicanAgave	Peter and De Chiara et al., Nature, 2018
884	http://1002genomes.u-strasbg.fr/files/	NA	LCBG-3D2	CPMOSW	Distillery	Tamaulipas, Mexico	2	MexicanAgave	Hernández et al., A.v.l, 2012
885	http://1002genomes.u-strasbg.fr/files/	NA	LCBG-3Y3	CPNOSW	Distillery	Tamaulipas, Mexico	2	MexicanAgave	Hernández et al., A.v.l, 2012
886	http://1002genomes.u-strasbg.fr/files/	NA	LCBG-3D4	CPQOSW	Distillery	Tamaulipas, Mexico	2	MexicanAgave	Peter and De Chiara et al., Nature, 2018
887	http://1002genomes.u-strasbg.fr/files/	NA	LCBG-3Y8	CPROSW	Distillery	Tamaulipas, Mexico	2	MexicanAgave	Hernández et al., A.v.l, 2012
888	http://1002genomes.u-strasbg.fr/files/	NA	FTPW4	CPSOSW	Palm wine	Burkina Faso	3	AfricanPalmWine	Tapsoba et al., IJFM, 2015
889	http://1002genomes.u-strasbg.fr/files/	NA	FTPW3	CPTOSW	Palm wine	Burkina Faso	2	AfricanPalmWine	Tapsoba et al., IJFM, 2015
890	http://1002genomes.u-strasbg.fr/files/	NA	FTPW32	CQAOSW	Palm wine	Burkina Faso	2	AfricanPalmWine	Tapsoba et al., IJFM, 2015
891	http://1002genomes.u-strasbg.fr/files/	NA	FTPW35	CQBOSW	Palm wine	Burkina Faso	2	AfricanPalmWine	Tapsoba et al., IJFM, 2015
892	http://1002genomes.u-strasbg.fr/files/	NA	MTF2546	CQCOSW	Fermentation	West Africa	2	WestAfricanCocoa	Jespersen et.al, JID, 2013
893	http://1002genomes.u-strasbg.fr/files/	NA	MTF2547	CQDOSW	Fermentation	West Africa	2	WestAfricanCocoa	Jespersen et.al, JID, 2013
894	http://1002genomes.u-strasbg.fr/files/	NA	MTF2548	CQEOSW	Fermentation	West Africa	2	WestAfricanCocoa	Jespersen et.al, JID, 2013
895	http://1002genomes.u-strasbg.fr/files/	NA	MTF2549	CQFOSW	Fermentation	West Africa	2	WestAfricanCocoa	Jespersen et.al, JID, 2013
896	http://1002genomes.u-strasbg.fr/files/	NA	MTF2550	CQGOSW	Fermentation	West Africa	2	WestAfricanCocoa	Jespersen et.al, JID, 2013
897	http://1002genomes.u-strasbg.fr/files/	NA	MTF2551	CQHOSW	Fermentation	West Africa	2	WestAfricanCocoa	Jespersen et.al, JID, 2013
898	http://1002genomes.u-strasbg.fr/files/	NA	MTF2552	CQIOSW	Fermentation	West Africa	2	WestAfricanCocoa	Jespersen et.al, JID, 2013
899	http://1002genomes.u-strasbg.fr/files/	NA	MTF2553	CQKOSW	Fermentation	West Africa	2	WestAfricanCocoa	Jespersen et.al, JID, 2013
900	http://1002genomes.u-strasbg.fr/files/	NA	MTF2554	CQLOSW	Fermentation	West Africa	2	WestAfricanCocoa	Jespersen et.al, JID, 2013
901	http://1002genomes.u-strasbg.fr/files/	NA	MTF2555	CQMOSW	Fermentation	West Africa	2	WestAfricanCocoa	Jespersen et.al, JID, 2013
902	http://1002genomes.u-strasbg.fr/files/	NA	MTF2556	CQNOSW	Fermentation	West Africa	2	WestAfricanCocoa	Jespersen et.al, JID, 2013
903	http://1002genomes.u-strasbg.fr/files/	NA	MTF2557	CQPOSW	Fermentation	West Africa	2	WestAfricanCocoa	Jespersen et.al, JID, 2013
904	http://1002genomes.u-strasbg.fr/files/	NA	RIB1006	CQQOSW	Sake	Japan	2	Sake-B	Peter and De Chiara et al., Nature, 2018
905	http://1002genomes.u-strasbg.fr/files/	NA	RIB1007	CQROSW	Sake	Japan	2	Sake-B	Peter and De Chiara et al., Nature, 2018
906	http://1002genomes.u-strasbg.fr/files/	NA	CEY647	CQSOSW	Nature	French Guiana	2	SouthAmericaMix2	Peter and De Chiara et al., Nature, 2018
907	http://1002genomes.u-strasbg.fr/files/	NA	L-982	CQTOSW	Wine	Argentina	2	WineEuropean	Peter and De Chiara et al., Nature, 2018
908	http://1002genomes.u-strasbg.fr/files/	NA	CD7-9Sv2	CQVOSW	Wine	Italy	2	WineEuropean	Peter and De Chiara et al., Nature, 2018
909	http://1002genomes.u-strasbg.fr/files/	NA	RB3-7Sc2	CRAOSW	Wine	Italy	2	WineEuropean	Peter and De Chiara et al., Nature, 2018
910	http://1002genomes.u-strasbg.fr/files/	NA	SC2-37	CRBOSW	Wine	Italy	2	WineEuropean	Peter and De Chiara et al., Nature, 2018
911	http://1002genomes.u-strasbg.fr/files/	NA	Ba-215	CRCOSW	Wine	Italy	2	WineEuropean	Peter and De Chiara et al., Nature, 2018
912	http://1002genomes.u-strasbg.fr/files/	NA	FIMA_3	CRDOSW	Wine	Italy	2	WineEuropean	Peter and De Chiara et al., Nature, 2018
913	http://1002genomes.u-strasbg.fr/files/	NA	CLQCA_17-111	CREOSW	Insect	Ecuador	3	MosaicsR3	Peter and De Chiara et al., Nature, 2018
914	http://1002genomes.u-strasbg.fr/files/	NA	L-846	CRGOSW	Wine	Chile	2	WineEuropean	Peter and De Chiara et al., Nature, 2018
915	http://1002genomes.u-strasbg.fr/files/	NA	L-319	CRHOSW	Wine	Chile	2	WineEuropean	Peter and De Chiara et al., Nature, 2018
916	http://1002genomes.u-strasbg.fr/files/	NA	AGME_5I	CRIOSW	Wine	Italy	2	WineEuropean	Peter and De Chiara et al., Nature, 2018
917	http://1002genomes.u-strasbg.fr/files/	NA	E1-6	CRKOSW	Wine	Italy	2	WineEuropean	Peter and De Chiara et al., Nature, 2018
918	http://1002genomes.u-strasbg.fr/files/	NA	C-6	CRLOSW	Wine	Georgia	2	WineEuropean	Capece et al., Food Micr., 2013
919	http://1002genomes.u-strasbg.fr/files/	NA	SK1	SACE_GAL	Lab strain	USA	2	AfricanPalmWine	Bergström et al., MBE, 2014
920	http://1002genomes.u-strasbg.fr/files/	NA	L1528	SACE_GAP	Wine	Chile	2	WineEuropean	Bergström et al., MBE, 2014
921	http://1002genomes.u-strasbg.fr/files/	NA	UWOPS83-787_3	SACE_GAS	Nature	Bahamas	2	NorthAmerican	Bergström et al., MBE, 2014
922	http://1002genomes.u-strasbg.fr/files/	NA	UWOPS87-2421	SACE_GAT	Nature	Hawaii	2	Other	Bergström et al., MBE, 2014
923	http://1002genomes.u-strasbg.fr/files/	NA	W303	SACE_GAV	Lab strain	NA	2	MosaicsR3	Bergström et al., MBE, 2014
924	http://1002genomes.u-strasbg.fr/files/	NA	273614N	SACE_MAA	Human, clinical	Newcastle, UK	2	MosaicsR2	Skelly et al., Gen. Res., 2013
925	http://1002genomes.u-strasbg.fr/files/	NA	378604X	SACE_MAB	Human, clinical	Newcastle, UK	2	MosaicsR3	Skelly et al., Gen. Res., 2013
926	http://1002genomes.u-strasbg.fr/files/	NA	UWOPS05_227_2	SACE_MAL	Insect	Telok Senangin, Malaysia	2	Malaysian	Skelly et al., Gen. Res., 2013
927	http://1002genomes.u-strasbg.fr/files/	NA	YJM189	SACE_YAA	Distillery	NA	2	WineEuropean	Strope, Gen Res, 2015
928	http://1002genomes.u-strasbg.fr/files/	NA	YJM193	SACE_YAB	Distillery	NA	2	MosaicsBeer	Strope, Gen Res, 2015
929	http://1002genomes.u-strasbg.fr/files/	NA	YJM195	SACE_YAC	Palm wine	Nigeria	2	AfricanPalmWine	Strope, Gen Res, 2015
930	http://1002genomes.u-strasbg.fr/files/	NA	YJM244	SACE_YAD	Human, clinical	Romania	2	WineEuropean	Strope, Gen Res, 2015
931	http://1002genomes.u-strasbg.fr/files/	NA	YJM248	SACE_YAE	Human	NA	2	Alpechin	Strope, Gen Res, 2015
932	http://1002genomes.u-strasbg.fr/files/	NA	YJM270	SACE_YAF	Wine	Slovenia	2	WineEuropean4	Strope, Gen Res, 2015
933	http://1002genomes.u-strasbg.fr/files/	NA	YJM271	SACE_YAG	Beer	NA	2	MosaicsBeer	Strope, Gen Res, 2015
934	http://1002genomes.u-strasbg.fr/files/	NA	YJM450	SACE_YAK	Human, clinical	California, USA	2	MosaicsR3	Strope, Gen Res, 2015
935	http://1002genomes.u-strasbg.fr/files/	NA	YJM451	SACE_YAL	Human, clinical	NA	2	MosaicsR3	Strope, Gen Res, 2015
936	http://1002genomes.u-strasbg.fr/files/	NA	YJM453	SACE_YAM	Human, clinical	NA	2	WineEuropean	Strope, Gen Res, 2015
937	http://1002genomes.u-strasbg.fr/files/	NA	YJM456	SACE_YAN	Human, clinical	California, USA	2	MosaicsR3	Strope, Gen Res, 2015
938	http://1002genomes.u-strasbg.fr/files/	NA	YJM541	SACE_YAP	Human, clinical	California, USA	2	MosaicsR3	Strope, Gen Res, 2015
939	http://1002genomes.u-strasbg.fr/files/	NA	YJM554	SACE_YAQ	Human, clinical	California, USA	2	MosaicsR3	Strope, Gen Res, 2015
940	http://1002genomes.u-strasbg.fr/files/	NA	YJM555	SACE_YAR	Human, clinical	California, USA	2	MosaicsR3	Strope, Gen Res, 2015
941	http://1002genomes.u-strasbg.fr/files/	NA	YJM681	SACE_YAT	Human, clinical	California, USA	2	MosaicsR3	Strope, Gen Res, 2015
942	http://1002genomes.u-strasbg.fr/files/	NA	YJM682	SACE_YAU	Human, clinical	Texas, USA	2	MosaicsR3	Strope, Gen Res, 2015
943	http://1002genomes.u-strasbg.fr/files/	NA	YJM683	SACE_YAV	Human, clinical	Texas, USA	2	MosaicsR3	Strope, Gen Res, 2015
944	http://1002genomes.u-strasbg.fr/files/	NA	YJM689	SACE_YAW	Human, clinical	Texas, USA	2	MosaicsR3	Strope, Gen Res, 2015
945	http://1002genomes.u-strasbg.fr/files/	NA	YJM693	SACE_YAX	Human, clinical	Texas, USA	2	Other	Strope, Gen Res, 2015
946	http://1002genomes.u-strasbg.fr/files/	NA	YJM969	SACE_YAY	Human, clinical	Italy	2	WineEuropean2	Strope, Gen Res, 2015
947	http://1002genomes.u-strasbg.fr/files/	NA	YJM972	SACE_YAZ	Human, clinical	Italy	2	WineEuropean2	Strope, Gen Res, 2015
948	http://1002genomes.u-strasbg.fr/files/	NA	YJM975	SACE_YBA	Human, clinical	Italy	2	WineEuropean2	Strope, Gen Res, 2015
949	http://1002genomes.u-strasbg.fr/files/	NA	YJM978	SACE_YBB	Human, clinical	Italy	2	WineEuropean2	Strope, Gen Res, 2015
950	http://1002genomes.u-strasbg.fr/files/	NA	YJM987	SACE_YBE	Human, clinical	Italy	2	WineEuropean2	Strope, Gen Res, 2015
951	http://1002genomes.u-strasbg.fr/files/	NA	YJM980	SACE_YBF	Human, clinical	Italy	2	WineEuropean2	Strope, Gen Res, 2015
952	http://1002genomes.u-strasbg.fr/files/	NA	YJM993	SACE_YBG	Human, clinical	Italy	2	WineEuropean2	Strope, Gen Res, 2015
953	http://1002genomes.u-strasbg.fr/files/	NA	YJM996	SACE_YBH	Human, clinical	Italy	2	WineEuropean2	Strope, Gen Res, 2015
954	http://1002genomes.u-strasbg.fr/files/	NA	YJM1190	SACE_YBJ	Human, clinical	Michigan, USA	2	MosaicsR3	Strope, Gen Res, 2015
955	http://1002genomes.u-strasbg.fr/files/	NA	YJM1199	SACE_YBK	Human, clinical	Michigan, USA	2	MosaicsR3	Strope, Gen Res, 2015
956	http://1002genomes.u-strasbg.fr/files/	NA	YJM1202	SACE_YBL	Human, clinical	Michigan, USA	2	MosaicsR3	Strope, Gen Res, 2015
957	http://1002genomes.u-strasbg.fr/files/	NA	YJM1208	SACE_YBM	Human, clinical	Michigan, USA	2	MosaicsR3	Strope, Gen Res, 2015
958	http://1002genomes.u-strasbg.fr/files/	NA	YJM1242	SACE_YBN	Fruit	Illinois, USA	2	WineEuropean	Strope, Gen Res, 2015
959	http://1002genomes.u-strasbg.fr/files/	NA	YJM1244	SACE_YBO	Fruit	Indonesia	2	WineEuropean	Strope, Gen Res, 2015
960	http://1002genomes.u-strasbg.fr/files/	NA	YJM1248	SACE_YBP	Wine	West Africa	2	AfricanPalmWine	Strope, Gen Res, 2015
961	http://1002genomes.u-strasbg.fr/files/	NA	YJM1250	SACE_YBQ	Sugar cane	NA	2	SouthAmericaMix3	Strope, Gen Res, 2015
962	http://1002genomes.u-strasbg.fr/files/	NA	YJM1252	SACE_YBR	Industrial	Spain	2	Alpechin	Strope, Gen Res, 2015
963	http://1002genomes.u-strasbg.fr/files/	NA	YJM1273	SACE_YBS	Tree	Pennsylvania, USA	2	NorthAmerican	Strope, Gen Res, 2015
964	http://1002genomes.u-strasbg.fr/files/	NA	YJM1304	SACE_YBT	Human, clinical	Texas, USA	2	MosaicsR3	Strope, Gen Res, 2015
965	http://1002genomes.u-strasbg.fr/files/	NA	YJM1307	SACE_YBU	Human, clinical	Washington DC, USA	2	MosaicsR3	Strope, Gen Res, 2015
966	http://1002genomes.u-strasbg.fr/files/	NA	YJM1311	SACE_YBV	Human, clinical	Michigan, USA	2	Other	Strope, Gen Res, 2015
967	http://1002genomes.u-strasbg.fr/files/	NA	YJM1326	SACE_YBW	Human, clinical	Minnesota, USA	2	Other	Strope, Gen Res, 2015
968	http://1002genomes.u-strasbg.fr/files/	NA	YJM1332	SACE_YBX	Wine	Italy	2	WineEuropean	Strope, Gen Res, 2015
969	http://1002genomes.u-strasbg.fr/files/	NA	YJM1336	SACE_YBY	Wine	Italy	2	WineEuropean	Strope, Gen Res, 2015
970	http://1002genomes.u-strasbg.fr/files/	NA	YJM1338	SACE_YBZ	Fruit	Maryland, USA	2	MosaicsR3	Strope, Gen Res, 2015
971	http://1002genomes.u-strasbg.fr/files/	NA	YJM1341	SACE_YCA	Wine	South Africa	2	WineEuropean	Strope, Gen Res, 2015
972	http://1002genomes.u-strasbg.fr/files/	NA	YJM1342	SACE_YCB	Soil	South Africa	2	SouthAfrica	Strope, Gen Res, 2015
973	http://1002genomes.u-strasbg.fr/files/	NA	YJM1355	SACE_YCC	Industrial	Illinois, USA	2	MosaicsR2	Strope, Gen Res, 2015
974	http://1002genomes.u-strasbg.fr/files/	NA	YJM1356	SACE_YCD	Cider	NA	2	WineEuropean	Strope, Gen Res, 2015
975	http://1002genomes.u-strasbg.fr/files/	NA	YJM1381	SACE_YCE	Distillery	Trinidad	2	MosaicsR3	Strope, Gen Res, 2015
976	http://1002genomes.u-strasbg.fr/files/	NA	YJM1383	SACE_YCF	Fruit	Philippines	2	MosaicsR2	Strope, Gen Res, 2015
977	http://1002genomes.u-strasbg.fr/files/	NA	YJM1385	SACE_YCG	Industrial	Maryland, USA	2	Other	Strope, Gen Res, 2015
978	http://1002genomes.u-strasbg.fr/files/	NA	YJM1386	SACE_YCH	Nature	Jamaica	2	MosaicsR3	Strope, Gen Res, 2015
979	http://1002genomes.u-strasbg.fr/files/	NA	YJM1387	SACE_YCI	Wine	Japan	2	MosaicsR1	Strope, Gen Res, 2015
980	http://1002genomes.u-strasbg.fr/files/	NA	YJM1388	SACE_YCJ	Unknown	Malaya	2	AsianFermentation	Strope, Gen Res, 2015
981	http://1002genomes.u-strasbg.fr/files/	NA	YJM1389	SACE_YCK	Industrial	Thailand	2	AsianFermentation	Strope, Gen Res, 2015
982	http://1002genomes.u-strasbg.fr/files/	NA	YJM1399	SACE_YCL	Tree	NA	2	SouthAmericaMix2	Strope, Gen Res, 2015
983	http://1002genomes.u-strasbg.fr/files/	NA	YJM1400	SACE_YCM	Fruit	Philippines	2	AsianIsland	Strope, Gen Res, 2015
984	http://1002genomes.u-strasbg.fr/files/	NA	YJM1401	SACE_YCN	Fruit	Philippines	2	Other	Strope, Gen Res, 2015
985	http://1002genomes.u-strasbg.fr/files/	NA	YJM1402	SACE_YCO	Wine	NA	2	NorthAmerican	Strope, Gen Res, 2015
986	http://1002genomes.u-strasbg.fr/files/	NA	YJM1415	SACE_YCP	Wine	France	2	WineEuropean	Strope, Gen Res, 2015
987	http://1002genomes.u-strasbg.fr/files/	NA	YJM1417	SACE_YCQ	Cider	NA	2	WineEuropean	Strope, Gen Res, 2015
988	http://1002genomes.u-strasbg.fr/files/	NA	YJM1418	SACE_YCR	Tree	Japan	2	CHN-IV	Strope, Gen Res, 2015
989	http://1002genomes.u-strasbg.fr/files/	NA	YJM1419	SACE_YCS	Unknown	NA	2	MosaicsR3	Strope, Gen Res, 2015
990	http://1002genomes.u-strasbg.fr/files/	NA	YJM1433	SACE_YCT	Wine	France	2	MosaicsR2	Strope, Gen Res, 2015
991	http://1002genomes.u-strasbg.fr/files/	NA	YJM1434	SACE_YCU	Tree	Pennsylvania, USA	2	NorthAmerican	Strope, Gen Res, 2015
992	http://1002genomes.u-strasbg.fr/files/	NA	YJM1439	SACE_YCV	Beer	West Africa	2	AfricanPalmWine	Strope, Gen Res, 2015
993	http://1002genomes.u-strasbg.fr/files/	NA	YJM1443	SACE_YCW	Fruit	Bahamas	2	NorthAmerican	Strope, Gen Res, 2015
994	http://1002genomes.u-strasbg.fr/files/	NA	YJM1444	SACE_YCX	Nature	Hawaii	2	Other	Strope, Gen Res, 2015
995	http://1002genomes.u-strasbg.fr/files/	NA	YJM1447	SACE_YCY	Tree	Malaysia	2	Malaysian	Strope, Gen Res, 2015
996	http://1002genomes.u-strasbg.fr/files/	NA	YJM1450	SACE_YCZ	Human, clinical	Kansas, USA	2	MosaicsR2	Strope, Gen Res, 2015
997	http://1002genomes.u-strasbg.fr/files/	NA	YJM1460	SACE_YDA	Palm wine	Newcastle, UK	2	AsianFermentation	Strope, Gen Res, 2015
998	http://1002genomes.u-strasbg.fr/files/	NA	YJM1463	SACE_YDB	Unknown	Africa	2	Other	Strope, Gen Res, 2015
999	http://1002genomes.u-strasbg.fr/files/	NA	YJM1477	SACE_YDC	Beer	Ethiopia	2	WineEuropean	Strope, Gen Res, 2015
1000	http://1002genomes.u-strasbg.fr/files/	NA	YJM1478	SACE_YDD	Fermentation	Missouri, USA	2	MosaicsBeer	Strope, Gen Res, 2015
1001	http://1002genomes.u-strasbg.fr/files/	NA	YJM1479	SACE_YDE	Palm wine	Phillipines	2	AsianIsland	Strope, Gen Res, 2015
1002	http://1002genomes.u-strasbg.fr/files/	NA	YJM1526	SACE_YDF	Human, clinical	NA	2	WineEuropean	Strope, Gen Res, 2015
1003	http://1002genomes.u-strasbg.fr/files/	NA	YJM1527	SACE_YDG	Fruit	California, USA	2	MosaicsR3	Strope, Gen Res, 2015
1004	http://1002genomes.u-strasbg.fr/files/	NA	YJM1549	SACE_YDH	Fermentation	Netherlands	2	MosaicsR3	Strope, Gen Res, 2015
1005	http://1002genomes.u-strasbg.fr/files/	NA	YJM1573	SACE_YDI	Unknown	India	2	NorthAmerican	Strope, Gen Res, 2015
1006	http://1002genomes.u-strasbg.fr/files/	NA	YJM1574	SACE_YDJ	Wine	NA	2	WineEuropean	Strope, Gen Res, 2015
1007	http://1002genomes.u-strasbg.fr/files/	NA	YJM1592	SACE_YDK	Industrial	Thailand	2	AsianFermentation	Strope, Gen Res, 2015
1008	http://1002genomes.u-strasbg.fr/files/	NA	YJM1615	SACE_YDL	Human, clinical	California, USA	2	MosaicsR3	Strope, Gen Res, 2015
1009	http://1002genomes.u-strasbg.fr/files/	NA	YJM1078	SACE_YDM	Human, clinical	Portugal	2	Alpechin	Strope, Gen Res, 2015
1010	http://1002genomes.u-strasbg.fr/files/	NA	YJM1083	SACE_YDN	Human, clinical	North Carolina, USA	2	MosaicsR3	Strope, Gen Res, 2015
1011	http://1002genomes.u-strasbg.fr/files/	NA	YJM1129	SACE_YDO	Distillery	Ohio, USA	2	WineEuropean	Strope, Gen Res, 2015
1012	PRJEB8455	ERR756197	GMY321	GMY321	wine	Portugal, Europe	NA	WineEuropean	Legras JL et al., MBE, 2018
1013	PRJEB8455	ERR756198	L174	L174	Commercial	France, Europe	NA	Other	Legras JL et al., MBE, 2018
1014	PRJEB8455	ERR756199	L175	L175	Commercial	France, Europe	NA	WineEuropean	Legras JL et al., MBE, 2018
1015	PRJEB8455	ERR756200	L181	L181	Commercial	France, Europe	NA	WineEuropean	Legras JL et al., MBE, 2018
1016	PRJEB8455	ERR756201	L214	L214	Commercial	NA	NA	MosaicsR2	Legras JL et al., MBE, 2018
1017	PRJEB8455	ERR756202	L328	L328	Cachaca	Brazil, South America	NA	SouthAmericaMix3	Legras JL et al., MBE, 2018
1018	PRJEB8455	ERR756203	L461	L461	wine	Portugal, Europe	NA	WineEuropean	Legras JL et al., MBE, 2018
1019	PRJEB8455	ERR756204	L528	L528	wine	Portugal	NA	WineEuropean	Legras JL et al., MBE, 2018
1020	PRJEB8455	ERR756205	L557	L557	Lab strain	NA	NA	MosaicsR3	Legras JL et al., MBE, 2018
1021	PRJEB8455	ERR756206	L560	L560	Clinical	Portugal	4	MixOrigin	Legras JL et al., MBE, 2018
1022	PRJEB8455	ERR756207	L561	L561	wine	Portugal	2 – 4	WineEuropean	Legras JL et al., MBE, 2018
1023	PRJEB8455	ERR756208	L564	L564	Commercial	France, Europe	NA	WineEuropean	Legras JL et al., MBE, 2018
1024	PRJEB8455	ERR756209	L708	L708	mushrooms	North America	3	MosaicsR3	Legras JL et al., MBE, 2018
1025	PRJEB8455	ERR756210	L709	L709	palm wine	NA	NA	MosaicsR3	Legras JL et al., MBE, 2018
1026	PRJEB8455	ERR756211	L710	L710	fruit	Indonesia	NA	AfricanPalmWine	Legras JL et al., MBE, 2018
1027	PRJEB8455	ERR756212	L711	L711	Bili wine	West Africa	NA	AfricanPalmWine	Legras JL et al., MBE, 2018
1028	PRJEB8455	ERR756213	L712	L712	unknown	French Guiana	NA	WineEuropean	Legras JL et al., MBE, 2018
1029	PRJEB8455	ERR756214	L715	L715	Coconut water	Philippines	NA	MosaicsR3	Legras JL et al., MBE, 2018
1030	PRJEB8455	ERR756215	L716	L716	palm wine	Ivory Coast	NA	MosaicsR3	Legras JL et al., MBE, 2018
1031	PRJEB8455	ERR756216	L719	L719	Saké	NA	NA	Sake-B	Legras JL et al., MBE, 2018
1032	PRJEB8455	ERR756217	L723	L723	wine	Turkey	NA	WineEuropean	Legras JL et al., MBE, 2018
1033	PRJEB8455	ERR756218	L725	L725	wine	Turkey	2 – 4	WineEuropean	Legras JL et al., MBE, 2018
1034	PRJEB8455	ERR756219	L742	L742	Fermented beverages	NA	NA	MosaicsR3	Legras JL et al., MBE, 2018
1035	PRJEB8455	ERR756220	L746	L746	Bakery	NA	2 – 4	MosaicsR3	Legras JL et al., MBE, 2018
1036	PRJEB8455	ERR756221	L750	L750	Bertram palm yeast	NA	NA	Malaysian	Legras JL et al., MBE, 2018
1037	PRJEB8455	ERR756222	L753	L753	Saké	NA	4	MosaicsR3	Legras JL et al., MBE, 2018
1038	PRJEB8455	ERR756223	L757	L757	palm wine	NA	NA	AsianFermentation	Legras JL et al., MBE, 2018
1039	PRJEB8455	ERR756224	L758	L758	Ginger beer	NA	2 – 4	MosaicsR3	Legras JL et al., MBE, 2018
1040	PRJEB8455	ERR756225	L761	L761	unknown	Med_oak	NA	MedOak	Legras JL et al., MBE, 2018
1041	PRJEB8455	ERR756226	SD085	SD085	wine	France, Europe	NA	WineEuropean	Legras JL et al., MBE, 2018
1042	PRJEB8455	ERR756227	L292	L292	Commercial	France, Europe	2 – 4	WineEuropean	Legras JL et al., MBE, 2018
1043	PRJEB6529	ERR560545	1014-F5	1014_F5	Wine	Italy, Prof. Cavalieri, Pharmacology Department, University of Florence	NA	WineEuropean	Genowine project
1044	PRJEB6529	ERR560543	20B2	20B2	Wine	France; UMR SPO	NA	WineEuropean	Genowine project
1045	PRJEB6529	ERR560544	22A4	22A4	Wine	France; UMR SPO	NA	WineEuropean	Genowine project
1046	PRJEB6529	ERR1276734	59A	59A	Wine	NA	NA	WineEuropean	Genowine project
1047	PRJEB6529	ERR560550	6320-A7	6320_A7	Wine	Lallemand	NA	WineEuropean	Genowine project
1048	PRJEB6529	ERR560548	2021-07-07	7_7	Flor	Spain, Prof. Cantoral, University of Cadiz	2 – 4	WineEuropean4	Genowine project
1049	PRJEB6529	ERR560539	D47-60-3B	D47_60_3B	Wine	France; UMR SPO	NA	WineEuropean	Genowine project
1050	PRJEB6529	ERR560554	F12-3B	F12_3B	Flor	Spain, Prof. Mauricio, Department of Microbiology, University of Cordoba (Guijo et al.1997)	NA	Other	Genowine project
1051	PRJEB6529	ERR560552	F25	F25	Flor	Spain, Prof. Mauricio, Department of Microbiology, University of Cordoba (Guijo et al.1997)	3	WineEuropean4	Genowine project
1052	PRJEB6529	ERR560553	FS2D	FS2D	Flor	Italy; Zara et al. (2008)	NA	WineEuropean4	Genowine project
1053	PRJEB6529	ERR560551	GE7-4A	GE7_4A	Wine	France; UMR SPO	NA	WineEuropean	Genowine project
1054	PRJEB6529	ERR560540	GUF54-A1	GUF54_A1	Flor	France; UMR SPO	NA	WineEuropean4	Genowine project
1055	PRJEB6529	ERR560542	K1-280-2B	K1_280_2B	Wine	France; UMR SPO	NA	WineEuropean	Genowine project
1056	PRJEB6529	ERR560547	L1414	L1414	Wine	France; UMR SPO	2 – 4	WineEuropean	Genowine project
1057	PRJEB6529	ERR560546	P3-D5	P3_D5	Flor	France; UMR SPO	NA	WineEuropean4	Genowine project
1058	PRJEB6529	ERR560541	TA12-2	TA12_2	Flor	Hungary, Prof. Maraz, Corvinus University of Budapest	NA	WineEuropean4	Genowine project
1059	PRJEB6529	ERR560549	TS12-A7	TS12_A7	Flor	Hungary, Prof. Maraz, Corvinus University of Budapest	2 – 4	WineEuropean4	Genowine project
1060	PRJEB7601	ERR747925	DBQ22	DBQ22	Ficus carica	Halkidiki, Greece	NA	Other	Almeida et al., ME, 2015
1061	PRJEB7601	ERR915336	DBQ26	DBQ26	Quercus pubescens	Halkidiki, Greece	NA	MedOak	Almeida et al., ME, 2015
1062	PRJEB7601	ERR747926	DBS11	DBS11	Ficus carica	Halkidiki, Greece	NA	MosaicsR3	Almeida et al., ME, 2015
1063	PRJEB7601	ERR747927	DBS12	DBS12	Ficus carica	Halkidiki, Greece	NA	MosaicsR3	Almeida et al., ME, 2015
1064	PRJEB7601	ERR754601	DBVPG10100	DBVPG10100	Quercus cerris	Parco del Monte Subasio, Italy	NA	MedOak	Almeida et al., ME, 2015
1065	PRJEB7601	ERR754600	EXF6719	EXF6719	Wine	Cuber, Slovenia	NA	WineEuropean	Almeida et al., ME, 2015
1066	PRJEB7601	ERR754599	EXF6761	EXF6761	Quercus petraea	Cerkvenjak, Slovenia	NA	WineEuropean	Almeida et al., ME, 2015
1067	PRJEB7601	ERR912235	EXF6780	EXF6780	Quercus petraea	Velike Lašče, Kobila hill, Slovenia	NA	MosaicsR3	Almeida et al., ME, 2015
1068	PRJEB7601	ERR912231	MIX1	MIX1	Lab strain	NA	NA	MedOak	Almeida et al., ME, 2015
1069	PRJEB7601	ERR912232	MIX2	MIX2	Lab strain	NA	NA	MedOak	Almeida et al., ME, 2015
1070	PRJEB7601	ERR754604	SDO2s1	SDO2s1	Oak	North Carolina, USA	NA	NorthAmerican	Almeida et al., ME, 2015
1071	PRJEB7601	ERR754602	SDO3s1	SDO3s1	Oak	North Carolina, USA	NA	NorthAmerican	Almeida et al., ME, 2015
1072	PRJEB7601	ERR754603	SDO6s1	SDO6s1	Oak	North Carolina, USA	NA	NorthAmerican	Almeida et al., ME, 2015
1073	PRJEB7601	ERR754605	SDO8s1	SDO8s1	Oak	North Carolina, USA	NA	NorthAmerican	Almeida et al., ME, 2015
1074	PRJEB7601	ERR754606	SM69s1	SM69s1	Oak	North Carolina, USA	NA	NorthAmerican	Almeida et al., ME, 2015
1075	PRJEB7601	ERR747922	ZP530	ZP530	Castanea sativa	Marão, Campeã, Portugal	NA	Other	Almeida et al., ME, 2015
1076	PRJEB7601	ERR747912	ZP541	ZP541	Fagus sylvatica	Adagoi, Portugal	NA	MedOak	Almeida et al., ME, 2015
1077	PRJEB7601	ERR915338	ZP560	ZP560	Quercus pyrenaica	Castelo de Vide, Portugal	NA	MedOak	Almeida et al., ME, 2015
1078	PRJEB7601	ERR752940	ZP561	ZP561	Quercus pyrenaica	Castelo de Vide, Portugal	NA	MedOak	Almeida et al., ME, 2015
1079	PRJEB7601	ERR752934	ZP562	ZP562	Quercus ilex	Castelo de Vide, Portugal	NA	MedOak	Almeida et al., ME, 2015
1080	PRJEB7601	ERR747917	ZP563	ZP563	Castanea sativa	Castelo de Vide, Portugal	NA	MedOak	Almeida et al., ME, 2015
1081	PRJEB7601	ERR747918	ZP564	ZP564	Quercus pyrenaica	Castelo de Vide, Portugal	NA	MedOak	Almeida et al., ME, 2015
1082	PRJEB7601	ERR752939	ZP565	ZP565	Castanea sativa	Castelo de Vide, Portugal	NA	MedOak	Almeida et al., ME, 2015
1083	PRJEB7601	ERR747919	ZP566	ZP566	Quercus faginea	Castelo de Vide, Portugal	NA	MedOak	Almeida et al., ME, 2015
1084	PRJEB7601	ERR752938	ZP568	ZP568	Quecus pyrenaica	Castelo de Vide, Portugal	NA	MedOak	Almeida et al., ME, 2015
1085	PRJEB7601	ERR747916	ZP570	ZP570	Fraxinus sp.	Paul Boquilobo, Portugal	NA	MedOak	Almeida et al., ME, 2015
1086	PRJEB7601	ERR747920	ZP575	ZP575	Quercus pyrenaica	Castelo de Vide, Portugal	NA	MedOak	Almeida et al., ME, 2015
1087	PRJEB7601	ERR752930	ZP577	ZP577	Quercus faginea	Aldeia das Dez, Portugal	NA	WineEuropean	Almeida et al., ME, 2015
1088	PRJEB7601	ERR752929	ZP578	ZP578	Quercus faginea	Aldeia das Dez, Portugal	NA	WineEuropean	Almeida et al., ME, 2015
1089	PRJEB7601	ERR752931	ZP579	ZP579	Quercus pyrenaica	Aldeia das Dez, Portugal	NA	WineEuropean	Almeida et al., ME, 2015
1090	PRJEB7601	ERR747921	ZP590	ZP590	Quercus pyrenaica	Castelo de Vide, Portugal	NA	MedOak	Almeida et al., ME, 2015
1091	PRJEB7601	ERR752935	ZP633	ZP633	Quercus pyrenaica	Castelo de Vide, Portugal	NA	MedOak	Almeida et al., ME, 2015
1092	PRJEB7601	ERR752936	ZP636	ZP636	Castanea sativa	Castelo de Vide, Portugal	NA	MedOak	Almeida et al., ME, 2015
1093	PRJEB7601	ERR747910	ZP641	ZP641	Spontaneous red wine fermentation	Castelo de Vide, Portugal	NA	WineEuropean	Almeida et al., ME, 2015
1094	PRJEB7601	ERR752944	ZP649	ZP649	Quercus acutissima	Chiba Perfecture, Japan	NA	NorthAmerican	Almeida et al., ME, 2015
1095	PRJEB7601	ERR752945	ZP650	ZP650	Quercus acutissima	Chiba Perfecture, Japan	NA	NorthAmerican	Almeida et al., ME, 2015
1096	PRJEB7601	ERR747923	ZP651	ZP651	Quercus acutissima	Chiba Perfecture, Japan	NA	NorthAmerican	Almeida et al., ME, 2015
1097	PRJEB7601	ERR747924	ZP652	ZP652	Quercus acutissima	Chiba Perfecture, Japan	NA	NorthAmerican	Almeida et al., ME, 2015
1098	PRJEB7601	ERR752942	ZP653	ZP653	Quercus acutissima	Chiba Perfecture, Japan	NA	NorthAmerican	Almeida et al., ME, 2015
1099	PRJEB7601	ERR752946	ZP654	ZP654	Quercus acutissima	Chiba Perfecture, Japan	NA	NorthAmerican	Almeida et al., ME, 2015
1100	PRJEB7601	ERR752947	ZP655	ZP655	Quercus acuta	Chiba Perfecture, Japan	NA	NorthAmerican	Almeida et al., ME, 2015
1101	PRJEB7601	ERR752941	ZP656	ZP656	Quercus acuta	Chiba Perfecture, Japan	NA	NorthAmerican	Almeida et al., ME, 2015
1102	PRJEB7601	ERR752948	ZP657	ZP657	Quercus acuta	Chiba Perfecture, Japan	NA	NorthAmerican	Almeida et al., ME, 2015
1103	PRJEB7601	ERR752949	ZP658	ZP658	Quercus acuta	Chiba Perfecture, Japan	NA	NorthAmerican	Almeida et al., ME, 2015
1104	PRJEB7601	ERR752950	ZP674	ZP674	Quercus acutissima	Chiba Perfecture, Japan	NA	NorthAmerican	Almeida et al., ME, 2015
1105	PRJEB7601	ERR754610	ZP675	ZP675	Quercus acutissima	Chiba Perfecture, Japan	NA	Other	Almeida et al., ME, 2015
1106	PRJEB7601	ERR754607	ZP676	ZP676	Quercus acutissima	Chiba Perfecture, Japan	NA	NorthAmerican	Almeida et al., ME, 2015
1107	PRJEB7601	ERR754608	ZP677	ZP677	Quercus acutissima	Chiba Perfecture, Japan	NA	NorthAmerican	Almeida et al., ME, 2015
1108	PRJEB7601	ERR754609	ZP678	ZP678	Quercus acutissima	Chiba Perfecture, Japan	NA	NorthAmerican	Almeida et al., ME, 2015
1109	PRJEB7601	ERR752943	ZP680	ZP680	Quercus acutissima	Chiba Perfecture, Japan	NA	NorthAmerican	Almeida et al., ME, 2015
1110	PRJEB7601	ERR752933	ZP736	ZP736	Rotten figs	Caratão, Abrantes, Portugal	NA	MedOak	Almeida et al., ME, 2015
1111	PRJEB7601	ERR747913	ZP742	ZP742	Rotten figs	Caratão, Abrantes, Portugal	NA	MedOak	Almeida et al., ME, 2015
1112	PRJEB7601	ERR754619	ZP778	ZP778	Quercus acutissima	Hirusen highland, Okayama Perfecture, Japan	NA	NorthAmerican	Almeida et al., ME, 2015
1113	PRJEB7601	ERR754611	ZP779	ZP779	Quercus acutissima	Hirusen highland, Okayama Perfecture, Japan	NA	NorthAmerican	Almeida et al., ME, 2015
1114	PRJEB7601	ERR754614	ZP781	ZP781	Quercus serrata	Hirusen highland, Okayama Perfecture, Japan	NA	NorthAmerican	Almeida et al., ME, 2015
1115	PRJEB7601	ERR754620	ZP783	ZP783	Quercus acutissima	Hirusen highland, Okayama Perfecture, Japan	NA	NorthAmerican	Almeida et al., ME, 2015
1116	PRJEB7601	ERR754621	ZP784	ZP784	Quercus dentata	Hirusen highland, Okayama Perfecture, Japan	NA	NorthAmerican	Almeida et al., ME, 2015
1117	PRJEB7601	ERR754612	ZP785	ZP785	Quercus dentata	Hirusen highland, Okayama Perfecture, Japan	NA	NorthAmerican	Almeida et al., ME, 2015
1118	PRJEB7601	ERR754617	ZP786	ZP786	Quercus dentata	Hirusen highland, Okayama Perfecture, Japan	NA	NorthAmerican	Almeida et al., ME, 2015
1119	PRJEB7601	ERR754615	ZP793	ZP793	Quercus dentata	Hirusen highland, Okayama Perfecture, Japan	NA	NorthAmerican	Almeida et al., ME, 2015
1120	PRJEB7601	ERR754622	ZP794	ZP794	Quercus dentata	Hirusen highland, Okayama Perfecture, Japan	NA	NorthAmerican	Almeida et al., ME, 2015
1121	PRJEB7601	ERR754616	ZP796	ZP796	Quercus dentata	Hirusen highland, Okayama Perfecture, Japan	NA	NorthAmerican	Almeida et al., ME, 2015
1122	PRJEB7601	ERR754613	ZP817	ZP817	Quercus acutissima	Hirusen highland, Okayama Perfecture, Japan	NA	NorthAmerican	Almeida et al., ME, 2015
1123	PRJEB7601	ERR754618	ZP823	ZP823	Quercus acutissima	Hirusen highland, Okayama Perfecture, Japan	NA	NorthAmerican	Almeida et al., ME, 2015
1124	PRJEB7601	ERR747915	ZP850	ZP850	Quercus ilex	Alconorales Natural Park, Andaluzia, Spain	NA	MedOak	Almeida et al., ME, 2015
1125	PRJEB7601	ERR912233	ZP851	ZP851	Quercus ilex	Alconorales Natural Park, Andaluzia, Spain	NA	MedOak	Almeida et al., ME, 2015
1126	PRJEB7601	ERR747914	ZP860	ZP860	Quercus ilex	Alconorales Natural Park, Andaluzia, Spain	NA	MedOak	Almeida et al., ME, 2015
1127	PRJEB7601	ERR747909	ZP861	ZP861	Sun-dryed apple with ants	Caratão, Abrantes, Portugal	NA	WineEuropean	Almeida et al., ME, 2015
1128	PRJEB7601	ERR747908	ZP862	ZP862	Apple with insect holes	Caratão, Abrantes, Portugal	NA	Other	Almeida et al., ME, 2015
1129	PRJNA516557	SRR8799696	CI001	CI001	cider	Unknown	2 – 4	WineEuropean	Gallone et al., Nat Eco Evo, 2019
1130	PRJNA516557	SRR8799700	KO001	KO001	Kombucha	Australia	2 – 4	Kombucha	Gallone et al., Nat Eco Evo, 2019
1131	PRJNA516557	SRR8799701	KO002	KO002	Kombucha	Belgium	2 – 4	Kombucha	Gallone et al., Nat Eco Evo, 2019
1132	PRJNA516557	SRR8799702	KO003	KO003	Kombucha	Hong Kong	2 – 4	Kombucha	Gallone et al., Nat Eco Evo, 2019
1133	PRJNA516557	SRR8799689	WL008	WL008	Cocoa	Malaysia	2 – 4	CHN-VI	Gallone et al., Nat Eco Evo, 2019
1134	PRJNA516557	SRR8799697	WL010	WL010	Apricot	Hungary	2 – 4	MosaicsR3	Gallone et al., Nat Eco Evo, 2019
1135	PRJNA516557	SRR8799688	WL011	WL011	Beer	USA - Michigan	NA	MosaicsBeer	Gallone et al., Nat Eco Evo, 2019
1136	PRJNA516557	SRR8799703	WL012	WL012	Beer	USA - New York	2 – 4	WineEuropean4	Gallone et al., Nat Eco Evo, 2019
1137	PRJNA516557	SRR8799704	WL013	WL013	Wild	USA - Virginia	NA	WineEuropean	Gallone et al., Nat Eco Evo, 2019
1138	PRJNA516557	SRR8799705	WL014	WL014	Wild	USA - New York	4	Beer	Gallone et al., Nat Eco Evo, 2019
1139	PRJNA516557	SRR8799706	WL015	WL015	Beer	USA - Virginia	3	MosaicsBeer	Gallone et al., Nat Eco Evo, 2019
1140	PRJNA516557	SRR8799699	WL016	WL016	Wild	USA - Virginia	2 – 4	MosaicsBeer	Gallone et al., Nat Eco Evo, 2019
1141	PRJEB1871	ERR266412	E-SYBR-8:YE3	YE3	Fecal sample of Crohn's patient	Italy	2 – 4	WineEuropean	Ramazzotti et al, EM, 2018
1142	PRJEB1871	ERR266413	E-SYBR-8:Y13EU	Y13EU	NA	NA	2 – 4	MixOrigin	Ramazzotti et al, EM, 2018
1143	PRJEB1871	ERR266414	E-SYBR-8:YB7	YB7	Fecal sample of Crohn's patient	Italy	2 – 4	WineEuropean	Ramazzotti et al, EM, 2018
1144	PRJEB1871	ERR266415	E-SYBR-8:Sgu421	Sgu421	Sangiovese natural fermentation	Florence, Italy	5	WineEuropean	Ramazzotti et al, EM, 2018
1145	PRJEB1871	ERR266416	E-SYBR-8:YH1	YH1	Fecal sample of Crohn's patient	Italy	NA	AfricanPalmWine	Ramazzotti et al, EM, 2018
1146	PRJEB1871	ERR266417	E-SYBR-8:YE2	YE2	Fecal sample of Crohn's patient	Italy	NA	WineEuropean	Ramazzotti et al, EM, 2018
1147	PRJEB1871	ERR266418	E-SYBR-8:Sgu165	Sgu165	Sangiovese natural fermentation	Florence, Italy	2 – 4	WineEuropean	Ramazzotti et al, EM, 2018
1148	PRJEB1871	ERR266420	E-SYBR-8:BIBV5.3	BIBV5_3	Wasp intestine	Tuscany, Italy	2 – 4	MixOrigin	Ramazzotti et al, EM, 2018
1149	PRJEB1871	ERR266421	E-SYBR-8:YUC22_34D	YUC22_34D	Clinical	NA	NA	AfricanPalmWine	Ramazzotti et al, EM, 2018
1150	PRJEB1871	ERR266422	E-SYBR-8:YUC5	YUC5	Clinical	NA	NA	MosaicsR3	Ramazzotti et al, EM, 2018
1151	PRJEB1871	ERR266423	E-SYBR-8:SGU165-50A	SGU165_50A	MS-Sgu165	Florence, Italy	NA	WineEuropean	Ramazzotti et al, EM, 2018
1152	PRJEB1871	ERR266424	E-SYBR-8:1014g5	1014g(?)5	Grape	Italy	NA	WineEuropean	Ramazzotti et al, EM, 2018
1153	PRJEB1871	ERR266425	E-SYBR-8:YA5	YA5	Fecal sample of Crohn's patient	Italy	4	MixOrigin	Ramazzotti et al, EM, 2018
1154	PRJEB1871	ERR266426	E-SYBR-8:YVPC7.6	YVPC7_6	Wasp intestine	Tuscany, Italy	2 – 4	MixOrigin	Ramazzotti et al, EM, 2018
1155	PRJEB1871	ERR266427	E-SYBR-8:YUC22	YUC22	Fecal sample of Ulcerative Colitis patient	Italy	4	MixOrigin	Ramazzotti et al, EM, 2018
1156	PRJEB1871	ERR266428	E-SYBR-8:EM93	EM93	Rotting fig	Mercedes, California, USA	2 – 4	MosaicsR3	Ramazzotti et al, EM, 2018
1157	PRJEB1871	ERR266429	E-SYBR-8:YA5_46A	YA5_46A	MS-YA5	Italy	2 – 4	MixOrigin	Ramazzotti et al, EM, 2018
1158	PRJEB1871	ERR266430	E-SYBR-8:YB10	YB10	fecal sample of Crohn's patient	Italy	2 – 4	WineEuropean	Ramazzotti et al, EM, 2018
1159	PRJEB1871	ERR266431	E-SYBR-8:YA5_46D	YA5_46D	MS-YA5 strain	Italy	NA	MixOrigin	Ramazzotti et al, EM, 2018
1160	PRJEB1871	ERR266432	E-SYBR-8:YUC22_34C	YUC22_34C	MS-YUC22	Italy	2 – 4	MixOrigin	Ramazzotti et al, EM, 2018
1161	PRJEB1871	ERR266433	E-SYBR-8:REG1B-25A	REG1B_25A	Wasp intestine	Tuscany, Italy	NA	WineEuropean	Ramazzotti et al, EM, 2018
1162	PRJEB1871	ERR266435	E-SYBR-8:YB8	YB8	Fecal sample of Crohn's patient	Italy	2 – 4	WineEuropean	Ramazzotti et al, EM, 2018
1163	PRJEB1871	ERR266436	E-SYBR-8:YP4_40D	YP4_40D	Fecal sample of Crohn's patient	Italy	2 – 4	MixOrigin	Ramazzotti et al, EM, 2018
1164	PRJEB1871	ERR266437	E-SYBR-8:SG60	SG60	Sangiovese natural fermentation	Florence, Italy	NA	WineEuropean	Ramazzotti et al, EM, 2018
1165	PRJEB11698	ERR1111487	UFMG-CM-Y262	UFMG_CM_Y262	Tapirira guianensis	Riparian forest of Córrego, Buritizal, Tocantins, Brazil	NA	SouthAmericaMix1	Barbosa et al., GBE, 2016
1166	PRJEB11698	ERR1111488	UFMG-CM-Y264	UFMG_CM_Y264	Tapirira guianensis	Riparian forest of Córrego, Buritizal, Tocantins, Brazil	NA	SouthAmericaMix1	Barbosa et al., GBE, 2016
1167	PRJEB11698	ERR1111489	UFMG-CM-Y455	UFMG_CM_Y455	Tapirira guianensis	Riparian forest of Córrego, Buritizal, Tocantins, Brazil	NA	SouthAmericaMix1	Barbosa et al., GBE, 2016
1168	PRJEB11698	ERR1111490	UFMG-CM-Y461	UFMG_CM_Y461	Mushroom	Serra da Prata, Mucajaí, Roraima Brazil	NA	SouthAmericaMix1	Barbosa et al., GBE, 2016
1169	PRJEB11698	ERR1111491	UFMG-CM-Y462	UFMG_CM_Y462	Mushroom	Serra da Prata, Mucajaí, Roraima Brazil	NA	SouthAmericaMix1	Barbosa et al., GBE, 2016
1170	PRJEB11698	ERR1111492	UFMG-CM-Y464	UFMG_CM_Y464	Non identified tree	Serra da Prata, Mucajaí, Roraima Brazil	NA	SouthAmericaMix1	Barbosa et al., GBE, 2016
1171	PRJEB11698	ERR1111493	UFMG-CM-Y639	UFMG_CM_Y639	Tapirira guianensis	Bela Vista, Taquaruçu, Brazil	NA	MosaicsR3	Barbosa et al., GBE, 2016
1172	PRJEB11698	ERR1111495	UFMG-CM-Y641	UFMG_CM_Y641	Tapirira guianensis	Taguatinga, Tocantins, Brazil	NA	SouthAmericaMix2	Barbosa et al., GBE, 2016
1173	PRJEB11698	ERR1111496	UFMG-CM-Y642	UFMG_CM_Y642	Tapirira guianensis	Taguatinga, Tocantins, Brazil	NA	SouthAmericaMix2	Barbosa et al., GBE, 2016
1174	PRJEB11698	ERR1111497	UFMG-CM-Y645	UFMG_CM_Y645	Tapirira guianensis	Bela Vista, Taquaruçu, Brazil	NA	SouthAmericaMix1	Barbosa et al., GBE, 2016
1175	PRJEB11698	ERR1111498	UFMG-CM-Y646	UFMG_CM_Y646	Tapirira guianensis	Bela Vista,Taquaruçu, Brazil	NA	SouthAmericaMix1	Barbosa et al., GBE, 2016
1176	PRJEB11698	ERR1111499	UFMG-CM-Y647	UFMG_CM_Y647	Tapirira guianensis	Bela Vista,Taquaruçu, Brazil	NA	SouthAmericaMix1	Barbosa et al., GBE, 2016
1177	PRJEB11698	ERR1111500	UFMG-CM-Y649	UFMG_CM_Y649	Tapirira guianensis	Bela Vista,Taquaruçu, Brazil	NA	SouthAmericaMix1	Barbosa et al., GBE, 2016
1178	PRJEB11698	ERR1111504	UFMG-CM-Y255	UFMG_CM_Y255	Non identified tree	Cascatona, Caraça, Minas Gerais, Brazil	NA	Other	Barbosa et al., GBE, 2016
1179	PRJEB11698	ERR1111505	UFMG-CM-Y257	UFMG_CM_Y257	Quercus rubra	Gardens of Caraça Sanctuary, Minas Gerais, Brazil	NA	SouthAmericaMix1	Barbosa et al., GBE, 2016
1180	PRJEB11698	ERR1111506	UFMG-CM-Y263	UFMG_CM_Y263	Tapirira guianensis	Riparian forest of Córrego, Buritizal, Tocantins, Brazil	NA	SouthAmericaMix2	Barbosa et al., GBE, 2016
1181	PRJEB11698	ERR1111507	UFMG-CM-Y266	UFMG_CM_Y266	Tapirira guianensis	Riparian forest of Córrego, Buritizal, Tocantins, Brazil	NA	SouthAmericaMix1	Barbosa et al., GBE, 2016
1182	PRJEB11698	ERR1111508	UFMG-CM-Y456	UFMG_CM_Y456	Jequitibá tree	Research Center Canguçu, T. da Praia, Tocantins, Brazil	5	SouthAmericaMix2	Barbosa et al., GBE, 2016
1183	PRJEB11698	ERR1111509	UFMG-CM-Y457	UFMG_CM_Y457	Non identified tree	Serra da Prata, Mucajaí, Roraima Brazil	NA	SouthAmericaMix1	Barbosa et al., GBE, 2016
1184	PRJEB11698	ERR1111510	UFMG-CM-Y463	UFMG_CM_Y463	Non identified tree	Serra da Prata, Mucajaí, Roraima Brazil	NA	SouthAmericaMix1	Barbosa et al., GBE, 2016
1185	PRJEB11698	ERR1111511	UFMG-CM-Y636	UFMG_CM_Y636	Tapirira guianensis	Riparian forest of Córrego, Buritizal, Tocantins, Brazil	NA	SouthAmericaMix3	Barbosa et al., GBE, 2016
1186	PRJEB11698	ERR1111512	UFMG-CM-Y643	UFMG_CM_Y643	Quercus rubra	Gardens of Caraça Sanctuary, Minas Gerais, Brazil	NA	SouthAmericaMix1	Barbosa et al., GBE, 2016
1187	PRJEB11698	ERR1111513	UFMG-CM-Y644	UFMG_CM_Y644	Non identified tree	Serra da Prata, Mucajaí, Roraima Brazil	NA	SouthAmericaMix1	Barbosa et al., GBE, 2016
1188	PRJEB11698	ERR1111486	UFMG-CM-Y260	UFMG_CM_Y260	Tapirira guianensis	Riparian forest of Córrego, Buritizal, Tocantins, Brazil	NA	SouthAmericaMix3	Barbosa et al., GBE, 2016
1189	PRJEB11698	ERR1111501	UFMG-CM-Y650	UFMG_CM_Y650	Tapirira guianensis	Dianapolis, Tocantins, Brazil	2 – 4	SouthAmericaMix1	Barbosa et al., GBE, 2016
1190	PRJEB30431	ERR3010122	A8	A8	Table olive brine	Purchased in Lisbon,Portugal	2 – 4	Alpechin	Pontes et al., FrontGenet, 2019
1191	PRJEB30431	ERR3010128	AP 16.1	AP_16_1	Table olive brine	Douro,Portugal	?	Alpechin	Pontes et al., FrontGenet, 2019
1192	PRJEB30431	ERR3010129	AP 17.1	AP_17_1	Table olive brine	Douro,Portugal	?	Alpechin	Pontes et al., FrontGenet, 2019
1193	PRJEB30431	ERR3010125	AP 5.4	AP_5_4	Table olive brine	Purchased in Lisbon,Portugal	?	Alpechin	Pontes et al., FrontGenet, 2019
1194	PRJEB30431	ERR3010126	AP 6.2	AP_6_2	Table olive brine	Purchased in Lisbon,Portugal	?	Alpechin	Pontes et al., FrontGenet, 2019
1195	PRJEB30431	ERR3010127	AP 7.2	AP_7_2	Table olive brine	Purchased in Lisbon,Portugal	?	Alpechin	Pontes et al., FrontGenet, 2019
1196	PRJEB30431	ERR3010131	MM 11	MM_11	Sediment of olive oil	Kolomban,Slovenia	?	Alpechin	Pontes et al., FrontGenet, 2019
1197	PRJEB30431	ERR3010132	NRRL-Y 12658	NRRL_Y_12658	Pig rectal contents	unknown	?	Alpechin	Pontes et al., FrontGenet, 2019
1198	PRJEB30431	ERR3010133	PYCC 2613	PYCC_2613	Human Feces	Portugal	?	Alpechin	Pontes et al., FrontGenet, 2019
1199	PRJEB30431	ERR3010134	PYCC 2708	PYCC_2708	Swine rectum	Portugal	NA	Alpechin	Pontes et al., FrontGenet, 2019
1200	PRJEB30431	ERR3010135	PYCC 4891	PYCC_4891	Table olive brine	Elvas,Portugal	2 – 4	Alpechin	Pontes et al., FrontGenet, 2019
1201	PRJEB30431	ERR3010136	PYCC 4935	PYCC_4935	Tableolivebrine	Portalegre,Portugal	NA	Alpechin	Pontes et al., FrontGenet, 2019
1202	PRJEB30431	ERR3010137	PYCC 6730	PYCC_6730	Alpechin	Spain	NA	Alpechin	Pontes et al., FrontGenet, 2019
1203	PRJEB30431	ERR3010138	PYCC 6731	PYCC_6731	Alpechin	Spain	NA	Alpechin	Pontes et al., FrontGenet, 2019
1204	PRJEB30431	ERR3010139	PYCC 6732	PYCC_6732	Alpechin	Spain	NA	Alpechin	Pontes et al., FrontGenet, 2019
1205	PRJEB30431	ERR3010140	PYCC 6733	PYCC_6733	Alpechin	Spain	2 – 4	Alpechin	Pontes et al., FrontGenet, 2019
1206	PRJEB30431	ERR3010143	S27	S27	Ripe olive (variety Belica)	Kolomban,Slovenia	NA	Alpechin	Pontes et al., FrontGenet, 2019
1207	PRJEB30431	ERR3010146	YO 652	YO_652	Table olives (variety Kalamata)	Purchased in Seattle,Washington,USA	NA	Alpechin	Pontes et al., FrontGenet, 2019
1208	PRJEB30431	ERR3010147	YO 653	YO_653	Table olives (variety Kalamata)	Purchased in Seattle,Washington,USA	NA	Alpechin	Pontes et al., FrontGenet, 2019
1209	PRJEB30431	ERR3010148	YO 654	YO_654	Table olives (variety Kalamata)	Purchased in Seattle,Washington,USA	NA	Alpechin	Pontes et al., FrontGenet, 2019
1210	PRJEB30431	ERR3010149	ZIM 2221	ZIM_2221	Olive oil (variety Oblica)	Split,Croatia	2 – 4	Alpechin	Pontes et al., FrontGenet, 2019
1211	PRJEB30431	ERR3010150	ZIM 2580	ZIM_2580	Sediment of olive oil	Kolomban,Slovenia	NA	Alpechin	Pontes et al., FrontGenet, 2019
1212	PRJNA396809	SRR7851763	155	155	Corn	Shan, Shandong	2N	Mantou7	Duan et al., Nat Commun, 2018
1213	PRJNA396809	SRR7851764	168	168	Apple, orchard	Shan, Shandong	2N	Mantou7	Duan et al., Nat Commun, 2018
1214	PRJNA396809	SRR7851741	229	229	Jujube, orchard	Shan, Shandong	2N	Mantou7	Duan et al., Nat Commun, 2018
1215	PRJNA396809	SRR7851740	427	427	Leaf of sorghum crop	Shan, Shandong	2N	Mantou7	Duan et al., Nat Commun, 2018
1216	PRJNA396809	SRR7851743	502	502	Leaf of corn crop	Shan, Shandong	2N	Mantou7	Duan et al., Nat Commun, 2018
1217	PRJNA396809	SRR7851789	3002-11-01	11_3002	Fermented mare's milk (kumis)	Mongolia	2N	DairyProducts	Duan et al., Nat Commun, 2018
1218	PRJNA396809	SRR7851919	1 day, 1:12:00	2_1392	Huangjiu (rice wine) starter	Shaoxing, Zhejiang	2N	AsianFermentation	Duan et al., Nat Commun, 2018
1219	PRJNA396809	SRR7851778	11:51:00	2_591	Huangjiu (rice wine) starter	Shaoxing, Zhejiang	2N	AsianFermentation	Duan et al., Nat Commun, 2018
1220	PRJNA396809	SRR7851786	3004-05-01	5_3004	Fermented mare's milk (kumis)	Ulaanbaatar, Mongolia	2N	DairyProducts	Duan et al., Nat Commun, 2018
1221	PRJNA396809	SRR7851747	AF	AF	Active dry yeast	Yantai, Shandong	2N	MixOrigin	Duan et al., Nat Commun, 2018
1222	PRJNA396809	SRR7851748	AFB.1	AFB_1	Active dry yeast	Yining, Xinjiang	4N+1	MixOrigin	Duan et al., Nat Commun, 2018
1223	PRJNA396809	SRR7851918	ANG.CJ.1	ANG_CJ_1	Active dry yeast	Yichang, Hubei	2N	Huangjiu	Duan et al., Nat Commun, 2018
1224	PRJNA396809	SRR7851753	ANG1	ANG1	Active dry yeast	Yichang, Hubei	3N	MixOrigin	Duan et al., Nat Commun, 2018
1225	PRJNA396809	SRR7851922	ANGGW.1	ANGGW_1	Active dry yeast	Yichang, Hubei	2N+1	Mantou-3	Duan et al., Nat Commun, 2018
1226	PRJNA396809	SRR7851788	B1-1	B1_1	Fermented mare's milk (kumis)	Yili, Kazak autonomous prefecture	2N	DairyProducts	Duan et al., Nat Commun, 2018
1227	PRJNA396809	SRR7851742	BJ1	BJ1	Pear, orchard	Shunyi, Beijing	2N	Mantou7	Duan et al., Nat Commun, 2018
1228	PRJNA396809	SRR7851855	BJ10	BJ10	Bark of Ulmus sp., secondary forest	Wuling Mountain, Beijing	2N+3	CHN-VIII	Duan et al., Nat Commun, 2018
1229	PRJNA396809	SRR7851854	BJ11	BJ11	Rotten wood, secondary forest	Wuling Mountain, Beijing	2N	CHN-VIII	Duan et al., Nat Commun, 2018
1230	PRJNA396809	SRR7851749	BJ13	BJ13	Rotten wood, secondary forest	Wuling Mountain, Beijing	2N	CHN-VIII	Duan et al., Nat Commun, 2018
1231	PRJNA396809	SRR7851731	BJ14	BJ14	Forest soil, secondary forest	Wuling Mountain, Beijing	2N	CHN-IV	Duan et al., Nat Commun, 2018
1232	PRJNA396809	SRR7851688	BJ15	BJ15	Bark of Quercus wutaishanica, secondary forest	Dongling Mountain, Beijing	2N	CHN-IV	Duan et al., Nat Commun, 2018
1233	PRJNA396809	SRR7851687	BJ16	BJ16	Bark of Quercus wutaishanica, secondary forest	Dongling Mountain, Beijing	2N	CHN-IV	Duan et al., Nat Commun, 2018
1234	PRJNA396809	SRR7851690	BJ17	BJ17	Bark of Quercus wutaishanica, secondary forest	Dongling Mountain, Beijing	2N	CHN-IV	Duan et al., Nat Commun, 2018
1235	PRJNA396809	SRR7851689	BJ18	BJ18	Bark of Quercus wutaishanica, secondary forest	Dongling Mountain, Beijing	2N	CHN-IV	Duan et al., Nat Commun, 2018
1236	PRJNA396809	SRR7851692	BJ19	BJ19	Bark of Quercus wutaishanica, secondary forest	Dongling Mountain, Beijing	2N	CHN-IV	Duan et al., Nat Commun, 2018
1237	PRJNA396809	SRR7851851	BJ2	BJ2	Apple, orchard	Shunyi, Beijing	2N+3	CHN-VIII	Duan et al., Nat Commun, 2018
1238	PRJNA396809	SRR7851691	BJ20	BJ20	Bark of Quercus wutaishanica, secondary forest	Dongling Mountain, Beijing	2N	CHN-IV	Duan et al., Nat Commun, 2018
1239	PRJNA396809	SRR7851694	BJ21	BJ21	Bark of Carya cathayensis, secondary forest	Dongling Mountain, Beijing	2N	CHN-IV	Duan et al., Nat Commun, 2018
1240	PRJNA396809	SRR7851693	BJ22	BJ22	Bark of Carya cathayensis, secondary forest	Dongling Mountain, Beijing	2N+5	CHN-IV	Duan et al., Nat Commun, 2018
1241	PRJNA396809	SRR7851695	BJ24	BJ24	Bark of Ulmus macrocarpa, secondary forest	Dongling Mountain, Beijing	2N	CHN-IV	Duan et al., Nat Commun, 2018
1242	PRJNA396809	SRR7851698	BJ25	BJ25	Bark of Ulmus macrocarpa, secondary forest	Dongling Mountain, Beijing	2N+1	CHN-IV	Duan et al., Nat Commun, 2018
1243	PRJNA396809	SRR7851757	BJ26	BJ26	Grape, orchard	Dongling Mountain, Beijing	2N+1	CHN-IV	Duan et al., Nat Commun, 2018
1244	PRJNA396809	SRR7851762	BJ27	BJ27	Grape, orchard	Dongling Mountain, Beijing	2N	CHN-IV	Duan et al., Nat Commun, 2018
1245	PRJNA396809	SRR7851830	BJ28	BJ28	Bark of Castanea sp., secondary forest	Wuling Mountain, Beijing	2N	CHN-VI	Duan et al., Nat Commun, 2018
1246	PRJNA396809	SRR7851720	BJ3	BJ3	Grape, orchard	Shunyi, Beijing	2N	CHN-IV	Duan et al., Nat Commun, 2018
1247	PRJNA396809	SRR7851828	BJ4	BJ4	Intestine of a butterfly, park	Haidian, Beijing	2N+2	CHN-VI	Duan et al., Nat Commun, 2018
1248	PRJNA396809	SRR7851850	BJ5	BJ5	Apple, orchard	Wuling Mountain, Beijing	1N	CHN-VIII	Duan et al., Nat Commun, 2018
1249	PRJNA396809	SRR7851727	BJ6	BJ6	Persimmon, orchard	Changping, Beijing	2N	CHN-IV	Duan et al., Nat Commun, 2018
1250	PRJNA396809	SRR7851827	BJ7	BJ7	Bark of Pyrus sp., ochard	Shunyi, Beijing	2N	CHN-VI	Duan et al., Nat Commun, 2018
1251	PRJNA396809	SRR7851744	BJ8	BJ8	Bark of Quercus mongokica, secondary forest	Wuling Mountain, Beijing	2N	CHN-IV	Duan et al., Nat Commun, 2018
1252	PRJNA396809	SRR7851849	BJ9	BJ9	Bark of Ulmus sp., secondary forest	Wuling Mountain, Beijing	1N	CHN-VIII	Duan et al., Nat Commun, 2018
1253	PRJNA396809	SRR7851800	BM5.1	BM5_1	Fermenting dough	Bayanzhuoer, Inner Mongolia	2N	Other	Duan et al., Nat Commun, 2018
1254	PRJNA396809	SRR7851917	BQ1.1	BQ1_1	Huangjiu (rice wine) starter	Longyan, Fujian	2N	Huangjiu	Duan et al., Nat Commun, 2018
1255	PRJNA396809	SRR7851916	BQ8.1	BQ8_1	Huangjiu (rice wine) starter	Leshan, Sichuan	2N	Huangjiu	Duan et al., Nat Commun, 2018
1256	PRJNA396809	SRR7851915	BQ8.2	BQ8_2	Huangjiu (rice wine) starter	Leshan, Sichuan	2N	Huangjiu	Duan et al., Nat Commun, 2018
1257	PRJNA396809	SRR7851754	BS	BS	Active dry yeast	Daqing, Heilongjiang	2N	MixOrigin	Duan et al., Nat Commun, 2018
1258	PRJNA396809	SRR7851717	BT1.1	BT1_1	Fermenting dough	Baotou, Inner Mongolia	2N+1	Mantou-1	Duan et al., Nat Commun, 2018
1259	PRJNA396809	SRR7851716	BT2.6	BT2_6	Fermenting dough	Baotou, Inner Mongolia	2N+2	Mantou-1	Duan et al., Nat Commun, 2018
1260	PRJNA396809	SRR7851715	BT2.8	BT2_8	Fermenting dough	Baotou, Inner Mongolia	2N+1	Mantou-1	Duan et al., Nat Commun, 2018
1261	PRJNA396809	SRR7851714	BT3	BT3	Fermenting dough	Baotou, Inner Mongolia	2N+4	Mantou-1	Duan et al., Nat Commun, 2018
1262	PRJNA396809	SRR7851713	BT4	BT4	Fermenting dough	Baotou, Inner Mongolia	2N+1	Mantou-1	Duan et al., Nat Commun, 2018
1263	PRJNA396809	SRR7851844	BTP1	BTP1	Fermenting rice	Yantai, Shandong	2N	Huangjiu	Duan et al., Nat Commun, 2018
1264	PRJNA396809	SRR7851780	C5-1	C5_1	Fermented mare's milk (kumis)	Yili, Kazak autonomous prefecture	3N	DairyProducts	Duan et al., Nat Commun, 2018
1265	PRJNA396809	SRR7851921	CJM11.1	CJM11_1	Fermenting dough	Yuncheng, Shandong	2N+4	Mantou-3	Duan et al., Nat Commun, 2018
1266	PRJNA396809	SRR7851711	CJM19.5	CJM19_5	Fermenting dough	Yuncheng, Shandong	2N+1	Mantou-2	Duan et al., Nat Commun, 2018
1267	PRJNA396809	SRR7851710	CJM19.6	CJM19_6	Fermenting dough	Yuncheng, Shandong	2N+3	Mantou-2	Duan et al., Nat Commun, 2018
1268	PRJNA396809	SRR7851924	CJM20.1	CJM20_1	Fermenting dough	Yuncheng, Shandong	2N+4	Mantou-3	Duan et al., Nat Commun, 2018
1269	PRJNA396809	SRR7851900	CJM21.4	CJM21_4	Fermenting dough	Yuncheng, Shandong	2N	Mantou-2	Duan et al., Nat Commun, 2018
1270	PRJNA396809	SRR7851737	CJM24.1	CJM24_1	Fermenting dough	Yuncheng, Shandong	2N	Mantou7	Duan et al., Nat Commun, 2018
1271	PRJNA396809	SRR7851901	CJM25.1	CJM25_1	Fermenting dough	Yuncheng, Shandong	2N+1	Mantou-2	Duan et al., Nat Commun, 2018
1272	PRJNA396809	SRR7851898	CJM25.4	CJM25_4	Fermenting dough	Yuncheng, Shandong	2N+3	Mantou-2	Duan et al., Nat Commun, 2018
1273	PRJNA396809	SRR7851899	CJM25.5	CJM25_5	Fermenting dough	Yuncheng, Shandong	2N	Mantou-2	Duan et al., Nat Commun, 2018
1274	PRJNA396809	SRR7851923	CJM6.2	CJM6_2	Fermenting dough	Yuncheng, Shandong	2N+4	Mantou-3	Duan et al., Nat Commun, 2018
1275	PRJNA396809	SRR7851906	CQJZ1.4	CQJZ1_4	Fermented rice	Shaoxing, Zhejiang	3N	AsianFermentation	Duan et al., Nat Commun, 2018
1276	PRJNA396809	SRR7851751	DBL.1	DBL_1	Active dry yeast	Danbao, Guangdong	3N+2	MixOrigin	Duan et al., Nat Commun, 2018
1277	PRJNA396809	SRR7851930	DJM4.1	DJM4_1	Fermenting dough	Yuncheng, Shandong	2N+2	Mantou-3	Duan et al., Nat Commun, 2018
1278	PRJNA396809	SRR7851779	DX10-3	DX10_3	Fermented yak milk	Dangxiong, Tibet	2N+1	DairyProducts	Duan et al., Nat Commun, 2018
1279	PRJNA396809	SRR7851677	F3-4	F3_4	Fermented mare's milk (kumis)	Bayangaole, Inner Mongolia	2N	DairyProducts	Duan et al., Nat Commun, 2018
1280	PRJNA396809	SRR7851829	FJ1	FJ1	Bark of Castanea mollissima, planted tree	Wuyi Mountain, Fujian	2N	CHN-VI	Duan et al., Nat Commun, 2018
1281	PRJNA396809	SRR7851910	FJ10	FJ10	Bark of Castanopsis fordii, primeval forest	Wuyi Mountain, Fujian	2N+1	CHN-I	Duan et al., Nat Commun, 2018
1282	PRJNA396809	SRR7851770	FJ11	FJ11	Waxberry, market	Wuyi Mountain, Fujian	2N	CHN-X	Duan et al., Nat Commun, 2018
1283	PRJNA396809	SRR7851824	FJ12	FJ12	Peach, market	Wuyi Mountain, Fujian	2N	CHN-VI	Duan et al., Nat Commun, 2018
1284	PRJNA396809	SRR7851758	FJ2	FJ2	Bark of Castanea mollissima, planted tree	Wuyi Mountain, Fujian	2N+4	CHN-V	Duan et al., Nat Commun, 2018
1285	PRJNA396809	SRR7851721	FJ3	FJ3	Bark of Castanea mollissima, planted tree	Wuyi Mountain, Fujian	2N+4	CHN-V	Duan et al., Nat Commun, 2018
1286	PRJNA396809	SRR7851709	FJ4	FJ4	Bark of Castanea mollissima, planted tree	Wuyi Mountain, Fujian	2N+1	CHN-V	Duan et al., Nat Commun, 2018
1287	PRJNA396809	SRR7851809	FJ5	FJ5	Bark of Castanea mollissima, planted tree	Wuyi Mountain, Fujian	2N	CHN-I	Duan et al., Nat Commun, 2018
1288	PRJNA396809	SRR7851875	FJ6	FJ6	Bark of Prunus mume, planted tree	Wuyi Mountain, Fujian	2N	CHN-V	Duan et al., Nat Commun, 2018
1289	PRJNA396809	SRR7851676	FJ7	FJ7	Bark of Hovenia acerba, primeval forest	Wuyi Mountain, Fujian	2N	CHN-I	Duan et al., Nat Commun, 2018
1290	PRJNA396809	SRR7851756	FJ8	FJ8	Bark of Cyclobalanopsis nubium, primeval forest	Wuyi Mountain, Fujian	2N	CHN-I	Duan et al., Nat Commun, 2018
1291	PRJNA396809	SRR7851755	FJ9	FJ9	Bark of Castanopsis fordii, primeval forest	Wuyi Mountain, Fujian	2N+1	CHN-I	Duan et al., Nat Commun, 2018
1292	PRJNA396809	SRR7851769	FJSA40.2	FJSA40_2	Bark, primeval forest	Fanjing Mountain, Guizhou	2N	CHN-X	Duan et al., Nat Commun, 2018
1293	PRJNA396809	SRR7851929	GS1	GS1	Fermenting dough	Lanzhou, Gansu	2N+3	Mantou-3	Duan et al., Nat Commun, 2018
1294	PRJNA396809	SRR7851863	GS3.1	GS3_1	Fermenting dough	Lanzhou, Gansu	2N+3	MosaicsR3	Duan et al., Nat Commun, 2018
1295	PRJNA396809	SRR7851817	GS5.6	GS5_6	Fermenting dough	Lanzhou, Gansu	2N+3	Mantou-3	Duan et al., Nat Commun, 2018
1296	PRJNA396809	SRR7851818	GS5.7	GS5_7	Fermenting dough	Lanzhou, Gansu	2N+4	Mantou-3	Duan et al., Nat Commun, 2018
1297	PRJNA396809	SRR7851819	GS6	GS6	Fermenting dough	Lanzhou, Gansu	2N+3	Mantou-3	Duan et al., Nat Commun, 2018
1298	PRJNA396809	SRR7851768	GT39.1	GT39_1	Bark, primeval forest	Gutian Mountain, Zhejiang	2N	CHN-X	Duan et al., Nat Commun, 2018
1299	PRJNA396809	SRR7851767	GT99.1	GT99_1	Bark, primeval forest	Gutian Mountain, Zhejiang	2N	CHN-X	Duan et al., Nat Commun, 2018
1300	PRJNA396809	SRR7851884	GZLJ3.1	GZLJ3_1	Fermented sorghum grain	Changshun, Guizhou	2N	Other	Duan et al., Nat Commun, 2018
1301	PRJNA396809	SRR7851883	GZLJ3.19	GZLJ3_19	Fermented sorghum grain	Changshun, Guizhou	2N	Baijiu	Duan et al., Nat Commun, 2018
1302	PRJNA396809	SRR7851886	GZLJ3.22	GZLJ3_22	Fermented sorghum grain	Changshun, Guizhou	2N+3	Baijiu	Duan et al., Nat Commun, 2018
1303	PRJNA396809	SRR7851885	GZLJ3.30	GZLJ3_30	Fermented sorghum grain	Changshun, Guizhou	2N+4	Baijiu	Duan et al., Nat Commun, 2018
1304	PRJNA396809	SRR7851845	HLJ1	HLJ1	Bark of Quercus mongokica, secondary forest	Jingbo lake, Heilongjiang	1N	CHN-IV	Duan et al., Nat Commun, 2018
1305	PRJNA396809	SRR7851792	HLJ10	HLJ10	Fermented sorghum grain	Qiqihaer, Heilongjiang	2N	Baijiu	Duan et al., Nat Commun, 2018
1306	PRJNA396809	SRR7851810	HLJ167	HLJ167	Fermented sorghum grain	Qiqihaer, Heilongjiang	2N	Baijiu	Duan et al., Nat Commun, 2018
1307	PRJNA396809	SRR7851823	HLJ2	HLJ2	Bark of Quercus mongokica, secondary forest	Jingbo lake, Heilongjiang	2N	CHN-VI	Duan et al., Nat Commun, 2018
1308	PRJNA396809	SRR7851821	HLJ201	HLJ201	Fermented sorghum grain	Qiqihaer, Heilongjiang	2N	Baijiu	Duan et al., Nat Commun, 2018
1309	PRJNA396809	SRR7851825	HLJ225	HLJ225	Fermented sorghum grain	Qiqihaer, Heilongjiang	2N	Baijiu	Duan et al., Nat Commun, 2018
1310	PRJNA396809	SRR7851826	HLJ3	HLJ3	Bark of Quercus mongokica, secondary forest	Jingbo lake, Heilongjiang	2N	CHN-VI	Duan et al., Nat Commun, 2018
1311	PRJNA396809	SRR7851853	HLJ4	HLJ4	Fermented sorghum grain	Qiqihaer, Heilongjiang	2N	Baijiu	Duan et al., Nat Commun, 2018
1312	PRJNA396809	SRR7851856	HLJ59	HLJ59	Fermented sorghum grain	Qiqihaer, Heilongjiang	2N	Baijiu	Duan et al., Nat Commun, 2018
1313	PRJNA396809	SRR7851909	HN1	HN1	Rotten wood, primeval forest	Diaoluo Mountain, Hainan	2N	CHN-I	Duan et al., Nat Commun, 2018
1314	PRJNA396809	SRR7851896	HN1.9	HN1_9	Fermenting dough	Xuchang, Henan	2N	Mantou-2	Duan et al., Nat Commun, 2018
1315	PRJNA396809	SRR7851808	HN10	HN10	Rotten wood, primeval forest	Wuzhi Mountain, Hainan	2N	CHN-III	Duan et al., Nat Commun, 2018
1316	PRJNA396809	SRR7851801	HN11	HN11	Rotten wood,primeval forest	Jianfengling Mountain, Hainan	1N+1	CHN-III	Duan et al., Nat Commun, 2018
1317	PRJNA396809	SRR7851876	HN13	HN13	Rotten wood, primeval forest	Jianfengling Mountain, Hainan	2N	CHN-V	Duan et al., Nat Commun, 2018
1318	PRJNA396809	SRR7851873	HN14	HN14	Rotten wood, primeval forest	Jianfengling Mountain, Hainan	2N+3	CHN-V	Duan et al., Nat Commun, 2018
1319	PRJNA396809	SRR7851874	HN15	HN15	Rotten wood, primeval forest	Wuzhi Mountain, Hainan	2N	CHN-V	Duan et al., Nat Commun, 2018
1320	PRJNA396809	SRR7851871	HN16	HN16	Forest soil, primeval forest	Wuzhi Mountain, Hainan	2N+4	CHN-V	Duan et al., Nat Commun, 2018
1321	PRJNA396809	SRR7851872	HN17	HN17	Bark of a Fagaceae tree, primeval forest	Wuzhi Mountain, Hainan	2N	CHN-V	Duan et al., Nat Commun, 2018
1322	PRJNA396809	SRR7851869	HN18	HN18	Bark of a Fagaceae tree, primeval forest	Wuzhi Mountain, Hainan	2N	CHN-V	Duan et al., Nat Commun, 2018
1323	PRJNA396809	SRR7851802	HN19	HN19	Bark of a Fagaceae tree, primeval forest	Wuzhi Mountain, Hainan	2N	CHN-III	Duan et al., Nat Commun, 2018
1324	PRJNA396809	SRR7851908	HN2	HN2	Rotten wood, primeval forest	Diaoluo Mountain, Hainan	2N+2	CHN-I	Duan et al., Nat Commun, 2018
1325	PRJNA396809	SRR7851804	HN2.2	HN2_2	Fermenting dough	Xuchang, Henan	1N	Other	Duan et al., Nat Commun, 2018
1326	PRJNA396809	SRR7851907	HN3	HN3	Rotten wood, primeval forest	Diaoluo Mountain, Hainan	2N	CHN-I	Duan et al., Nat Commun, 2018
1327	PRJNA396809	SRR7851806	HN3.8	HN3_8	Fermenting dough	Xuchang, Henan	2N	Huangjiu	Duan et al., Nat Commun, 2018
1328	PRJNA396809	SRR7851914	HN4	HN4	Rotten wood, primeval forest	Bawangling Mountain, Hainan	2N+2	CHN-I	Duan et al., Nat Commun, 2018
1329	PRJNA396809	SRR7851913	HN5	HN5	Rotten wood, primeval forest	Bawangling Mountain, Hainan	2N	CHN-I	Duan et al., Nat Commun, 2018
1330	PRJNA396809	SRR7851878	HN5.1	HN5_1	Dry fermented dough	Biyang, Henan	2N+2	Mantou-6	Duan et al., Nat Commun, 2018
1331	PRJNA396809	SRR7851912	HN6	HN6	Rotten wood, primeval forest	Bawangling Mountain, Hainan	2N	CHN-I	Duan et al., Nat Commun, 2018
1332	PRJNA396809	SRR7851736	HN6.1	HN6_1	Dry fermented dough	Biyang, Henan	2N	Mantou7	Duan et al., Nat Commun, 2018
1333	PRJNA396809	SRR7851791	HN9	HN9	Rotten wood, primeval forest	Wuzhi Mountain, Hainan	2N	CHN-III	Duan et al., Nat Commun, 2018
1334	PRJNA396809	SRR7851805	HQ1.1	HQ1_1	Huangjiu (rice wine) starter with Fermented monascus	Gutian, Fujian	2N	Mantou7	Duan et al., Nat Commun, 2018
1335	PRJNA396809	SRR7851771	HQ3.1	HQ3_1	Huangjiu (rice wine) starter	Gutian, Fujian	1N+1	Mantou7	Duan et al., Nat Commun, 2018
1336	PRJNA396809	SRR7851843	HZJZ4.5	HZJZ4_5	Fermented sorghum grain	Heze, Shandong	3N	Baijiu	Duan et al., Nat Commun, 2018
1337	PRJNA396809	SRR7851847	HZJZ5.4	HZJZ5_4	Fermented sorghum grain	Heze, Shandong	3N	Baijiu	Duan et al., Nat Commun, 2018
1338	PRJNA396809	SRR7851841	HZJZ5.5	HZJZ5_5	Fermented sorghum grain	Heze, Shandong	3N	Baijiu	Duan et al., Nat Commun, 2018
1339	PRJNA396809	SRR7851766	JHBMY20.1	JHBMY20_1	Bark, secondary forest	Muyu Town, Hubei	2N	CHN-X	Duan et al., Nat Commun, 2018
1340	PRJNA396809	SRR7851846	JL1	JL1	Bark of Quercus sp., secondary forest	Changbai Mountain, Jilin	2N+1	Other	Duan et al., Nat Commun, 2018
1341	PRJNA396809	SRR7851840	JL2	JL2	Bark of Quercus mongokica, secondary forest	Changbai Mountain, Jilin	2N	Other	Duan et al., Nat Commun, 2018
1342	PRJNA396809	SRR7851891	JL3	JL3	Peach, market	Changbai Mountain, Jilin	2N+1	Other	Duan et al., Nat Commun, 2018
1343	PRJNA396809	SRR7851807	JL4	JL4	Bark of Pyrus sp., ochard	Yanbian, Jilin	1N	CHN-VI	Duan et al., Nat Commun, 2018
1344	PRJNA396809	SRR7851761	JL5	JL5	Apple pear bark, Pyrus sp.	Yanbian, Jilin	2N+1	CHN-IV	Duan et al., Nat Commun, 2018
1345	PRJNA396809	SRR7851820	JM13.2	JM13_2	Fermenting dough	Yuncheng, Shanxi	2N	Mantou-3	Duan et al., Nat Commun, 2018
1346	PRJNA396809	SRR7851813	JM14.3	JM14_3	Fermenting dough	Quwo, Shanxi	2N	Mantou-3	Duan et al., Nat Commun, 2018
1347	PRJNA396809	SRR7851814	JM22.1	JM22_1	Fermenting dough	Shangluo, Shanxi	3N	Mantou-3	Duan et al., Nat Commun, 2018
1348	PRJNA396809	SRR7851797	JM28.13	JM28_13	Fermenting dough	Laiwu, Shandong	2N	Other	Duan et al., Nat Commun, 2018
1349	PRJNA396809	SRR7851739	JM28-16	JM28_16	Fermenting dough	Laiwu, Shandong	2N	Mantou7	Duan et al., Nat Commun, 2018
1350	PRJNA396809	SRR7851798	JM28.2	JM28_2	Fermenting dough	Laiwu, Shandong	2N	Other	Duan et al., Nat Commun, 2018
1351	PRJNA396809	SRR7851772	JM32.3	JM32_3	Huangjiu (rice wine) starter	Bangzhou, Hunan	2N	AsianFermentation	Duan et al., Nat Commun, 2018
1352	PRJNA396809	SRR7851773	JM32.8	JM32_8	Huangjiu (rice wine) starter	Bangzhou, Hunan	2N	AsianFermentation	Duan et al., Nat Commun, 2018
1353	PRJNA396809	SRR7851815	JM37.2	JM37_2	Fermenting dough	Hulin, Heilongjiang	2N	Mantou-3	Duan et al., Nat Commun, 2018
1354	PRJNA396809	SRR7851816	JM4.8	JM4_8	Fermenting dough	Quwo, Shanxi	2N	Mantou-3	Duan et al., Nat Commun, 2018
1355	PRJNA396809	SRR7851811	JM8.3	JM8_3	Fermenting dough	Taiyuan, Shanxi	2N+1	Mantou-3	Duan et al., Nat Commun, 2018
1356	PRJNA396809	SRR7851774	JQ10.6	JQ10_6	Dry fermented dough	Nanyang, Henan	2N	AsianFermentation	Duan et al., Nat Commun, 2018
1357	PRJNA396809	SRR7851738	JQ8.3	JQ8_3	Fermenting dough	Chengcheng, Shanxi	2N	Mantou7	Duan et al., Nat Commun, 2018
1358	PRJNA396809	SRR7851734	JQ8.4	JQ8_4	Fermenting dough	Chengcheng, Shanxi	2N	Mantou7	Duan et al., Nat Commun, 2018
1359	PRJNA396809	SRR7851839	JQ9.3	JQ9_3	Dry fermented dough	Nanyang, Henan	2N	Other	Duan et al., Nat Commun, 2018
1360	PRJNA396809	SRR7851877	JQ9.4	JQ9_4	Fermenting dough	Nanyang, Henan	2N	Mantou-6	Duan et al., Nat Commun, 2018
1361	PRJNA396809	SRR7851733	JQHG.1	JQHG_1	Fermenting dough	Chengcheng, Shanxi	2N+1	Mantou7	Duan et al., Nat Commun, 2018
1362	PRJNA396809	SRR7851707	JT10.10	JT10_10	Dry fermented dough	Huiyang, Shanxi	2N	Mantou7	Duan et al., Nat Commun, 2018
1363	PRJNA396809	SRR7851708	JT21.1	JT21_1	Dry fermented dough	Chengcheng, Shanxi	2N	Mantou7	Duan et al., Nat Commun, 2018
1364	PRJNA396809	SRR7851705	JT21.3	JT21_3	Dry fermented dough	Chengcheng, Shanxi	2N	Mantou7	Duan et al., Nat Commun, 2018
1365	PRJNA396809	SRR7851706	JT43.1	JT43_1	Dry fermented dough	Baoji, Shanxi	2N	Mantou7	Duan et al., Nat Commun, 2018
1366	PRJNA396809	SRR7851703	JT49.1	JT49_1	Dry fermented dough	Zhouzhi, Shanxi	2N	Mantou7	Duan et al., Nat Commun, 2018
1367	PRJNA396809	SRR7851704	JT49.3	JT49_3	Dry fermented dough	Xian, Shanxi	2N	Mantou7	Duan et al., Nat Commun, 2018
1368	PRJNA396809	SRR7851831	JT49.4	JT49_4	Dry fermented dough	Zhouzhi, Shanxi	2N+2	Other	Duan et al., Nat Commun, 2018
1369	PRJNA396809	SRR7851701	JT94.11	JT94_11	Dry fermented dough	Shangqiu, Henan	2N	Mantou7	Duan et al., Nat Commun, 2018
1370	PRJNA396809	SRR7851702	JTHB1	JTHB1	Dry fermented dough	Chengcheng, Shanxi	2N	Mantou7	Duan et al., Nat Commun, 2018
1371	PRJNA396809	SRR7851765	JXXY1.1	JXXY1_1	Bark, primeval forest	Xiangxiyuan, Shennongjia, Hubei	2N	CHN-X	Duan et al., Nat Commun, 2018
1372	PRJNA396809	SRR7851730	JXXY10.1	JXXY10_1	Bark, primeval forest	Xiangxiyuan, Shennongjia, Hubei	2N	CHN-IX	Duan et al., Nat Commun, 2018
1373	PRJNA396809	SRR7851726	JXXY16.1	JXXY16_1	Bark, primeval forest	Xiangxiyuan, Shennongjia, Hubei	2N	CHN-IX	Duan et al., Nat Commun, 2018
1374	PRJNA396809	SRR7851678	JZ1-4	JZ1_4	Fermented cow milk	Jiangzi, Tibet	2N	DairyProducts	Duan et al., Nat Commun, 2018
1375	PRJNA396809	SRR7851699	JZ10.1	JZ10_1	Dry fermented dough	Guangyuan, Sichuan	2N	Mantou7	Duan et al., Nat Commun, 2018
1376	PRJNA396809	SRR7851897	LJM21.1	LJM21_1	Fermenting dough	Yanan, Shanxi	2N+1	Mantou-2	Duan et al., Nat Commun, 2018
1377	PRJNA396809	SRR7851894	LJM21.10	LJM21_10	Fermenting dough	Yanan, Shanxi	2N	Mantou-2	Duan et al., Nat Commun, 2018
1378	PRJNA396809	SRR7851895	LJM21.3	LJM21_3	Fermenting dough	Yanan, Shanxi	3N+1	Mantou-2	Duan et al., Nat Commun, 2018
1379	PRJNA396809	SRR7851902	LJM21.9	LJM21_9	Fermenting dough	Yanan, Shanxi	2N+1	Mantou-2	Duan et al., Nat Commun, 2018
1380	PRJNA396809	SRR7851903	LJM6A.1	LJM6A_1	Fermenting dough	Yanan, Shanxi	2N+1-1	Mantou-2	Duan et al., Nat Commun, 2018
1381	PRJNA396809	SRR7851926	LJM6A.4	LJM6A_4	Fermenting dough	Yanan, Shanxi	2N+1	Mantou-2	Duan et al., Nat Commun, 2018
1382	PRJNA396809	SRR7851700	LJQ13.C7	LJQ13_C7	Fermenting dough	Yanan, Shanxi	2N	Mantou7	Duan et al., Nat Commun, 2018
1383	PRJNA396809	SRR7851890	LJQ131.6	LJQ131_6	Fermenting dough	Yanan, Shanxi	2N	Mantou7	Duan et al., Nat Commun, 2018
1384	PRJNA396809	SRR7851889	LJQ13A.5	LJQ13A_5	Fermenting dough	Yanan, Shanxi	2N	Mantou7	Duan et al., Nat Commun, 2018
1385	PRJNA396809	SRR7851888	LJQ13C.1	LJQ13C_1	Fermenting dough	Yanan, Shanxi	2N	Mantou7	Duan et al., Nat Commun, 2018
1386	PRJNA396809	SRR7851887	LJZ22.1	LJZ22_1	Dry fermented dough	Yanan, Shanxi	3N	Mantou7	Duan et al., Nat Commun, 2018
1387	PRJNA396809	SRR7851679	LM1-2	LM1_2	Fermented yak milk	Naqu, Tibet	3N	DairyProducts	Duan et al., Nat Commun, 2018
1388	PRJNA396809	SRR7851752	LSF.1	LSF_1	Active dry yeast	Mingguang, Anhui	3N+1	MixOrigin	Duan et al., Nat Commun, 2018
1389	PRJNA396809	SRR7851775	MJQ3.1	MJQ3_1	Huangjiu (rice wine) starter	Lishui, Zhejiang	3N	Huangjiu	Duan et al., Nat Commun, 2018
1390	PRJNA396809	SRR7851745	MLAF.1	MLAF_1	Active dry yeast	Yantai, Shandong	2N+1	MixOrigin	Duan et al., Nat Commun, 2018
1391	PRJNA396809	SRR7851776	MTJZ1	MTJZ1	Fermented sorghum grain	Renhuai, Guizhou	2N+3	Huangjiu	Duan et al., Nat Commun, 2018
1392	PRJNA396809	SRR7851777	MTJZ2	MTJZ2	Fermented sorghum grain	Renhuai, Guizhou	2N+3	Huangjiu	Duan et al., Nat Commun, 2018
1393	PRJNA396809	SRR7851842	MTJZ3	MTJZ3	Daqu (starter) of Baijiu (Chinese liquor)	Renhuai, Guizhou	2N+3	Baijiu	Duan et al., Nat Commun, 2018
1394	PRJNA396809	SRR7851893	MTJZ4	MTJZ4	Daqu (starter) of Chinese liquor	Renhuai, Guizhou	2N+3	Mantou7	Duan et al., Nat Commun, 2018
1395	PRJNA396809	SRR7851920	MTZ13.12	MTZ13_12	Soil from a distillery	Maotai, Guizhou	2N	Baijiu	Duan et al., Nat Commun, 2018
1396	PRJNA396809	SRR7851697	NGS21L.1	NGS21L_1	Bark, primeval forest	Nangong Mountain, Hubei	2N	CHN-X	Duan et al., Nat Commun, 2018
1397	PRJNA396809	SRR7851680	NQ13-1	NQ13_1	Fermented mixed goat and yak milk	Naqu, Tibet	3N	DairyProducts	Duan et al., Nat Commun, 2018
1398	PRJNA396809	SRR7851782	NX1	NX1	Melon patch soil	Zhongwei, Ningxia	1N	WineEuropean	Duan et al., Nat Commun, 2018
1399	PRJNA396809	SRR7851785	NX2	NX2	Soil, mulberry field	Helan Mountain, Ningxia	2N	WineEuropean	Duan et al., Nat Commun, 2018
1400	PRJNA396809	SRR7851784	NX3	NX3	Melon patch soil	Zhongwei, Ningxia	1N+1	WineEuropean	Duan et al., Nat Commun, 2018
1401	PRJNA396809	SRR7851796	NX4.1	NX4_1	Fermenting dough	Yinchuan, Ningxia	2N	Other	Duan et al., Nat Commun, 2018
1402	PRJNA396809	SRR7851812	NX7.1	NX7_1	Fermenting dough	Yinchuan, Ningxia	2N	Mantou-3	Duan et al., Nat Commun, 2018
1403	PRJNA396809	SRR7851864	NX8.1	NX8_1	Fermenting dough	Yinchuan, Ningxia	2N+3	mosaics	Duan et al., Nat Commun, 2018
1404	PRJNA396809	SRR7851927	NX8.3	NX8_3	Fermenting dough	Yinchuan, Ningxia	2N	MosaicsR3	Duan et al., Nat Commun, 2018
1405	PRJNA396809	SRR7851858	QH1.1	QH1_1	Fermenting dough	Qinghai	2N	Mantou-4	Duan et al., Nat Commun, 2018
1406	PRJNA396809	SRR7851681	QH1-3	QH1_3	Fermented yak milk	Hainan prefecture, Qinghai	3N	DairyProducts	Duan et al., Nat Commun, 2018
1407	PRJNA396809	SRR7851857	QH2.1	QH2_1	Fermenting dough	Qinghai	2N+2	Mantou-4	Duan et al., Nat Commun, 2018
1408	PRJNA396809	SRR7851682	QH21-3	QH21_3	Fermented yak milk	Delingha, Qinghai	3N	DairyProducts	Duan et al., Nat Commun, 2018
1409	PRJNA396809	SRR7851683	QH25-4	QH25_4	Fermented mixed goat and yak milk	Delingha, Qinghai	2N+2	DairyProducts	Duan et al., Nat Commun, 2018
1410	PRJNA396809	SRR7851795	QH3.1	QH3_1	Fermenting dough	Qinghai	2N	Mantou-4	Duan et al., Nat Commun, 2018
1411	PRJNA396809	SRR7851684	QH45-2	QH45_2	Fermented yak milk	Haibei prefecture, Qinghai	3N	DairyProducts	Duan et al., Nat Commun, 2018
1412	PRJNA396809	SRR7851793	QH6.5	QH6_5	Fermenting dough	Minhe, Qinghai	2N	Mantou-5	Duan et al., Nat Commun, 2018
1413	PRJNA396809	SRR7851794	QH7.2	QH7_2	Fermenting dough	Minhe, Qinghai	2N	Mantou-5	Duan et al., Nat Commun, 2018
1414	PRJNA396809	SRR7851862	QH7.3	QH7_3	Fermenting dough	Minhe, Qinghai	2N	Mantou-3	Duan et al., Nat Commun, 2018
1415	PRJNA396809	SRR7851799	QH7.4	QH7_4	Fermenting dough	Minhe, Qinghai	2N	Mantou-5	Duan et al., Nat Commun, 2018
1416	PRJNA396809	SRR7851822	SD1	SD1	Persimmon, planted tree	Anqiu, Shandong	2N+4	CHN-VI	Duan et al., Nat Commun, 2018
1417	PRJNA396809	SRR7851790	SD2	SD2	Bark of Quercus sp., planted tree	Taian, Shandong	2N+1	CHN-VI	Duan et al., Nat Commun, 2018
1418	PRJNA396809	SRR7851938	SD3	SD3	Bark of Quercus sp., planted tree	Taian, Shandong	2N	CHN-VI	Duan et al., Nat Commun, 2018
1419	PRJNA396809	SRR7851852	SD4	SD4	Grapes, orchard	Qufu, Shandong	2N	MosaicsR3	Duan et al., Nat Commun, 2018
1420	PRJNA396809	SRR7851905	SX1	SX1	Bark of a Fagaceae tree, primeval forest	Qinling Mountain, Shaanxi	2N	CHN-II	Duan et al., Nat Commun, 2018
1421	PRJNA396809	SRR7851939	SX10	SX10	Persimmon, planted tree	Qinling Mountain, Shaanxi	2N	CHN-VI	Duan et al., Nat Commun, 2018
1422	PRJNA396809	SRR7851940	SX11	SX11	Bark of walnut,planted tree	Qinling Mountain, Shaanxi	1N	Other	Duan et al., Nat Commun, 2018
1423	PRJNA396809	SRR7851904	SX2	SX2	Bark of a Fagaceae tree, primeval forest	Qinling Mountain, Shaanxi	2N	CHN-II	Duan et al., Nat Commun, 2018
1424	PRJNA396809	SRR7851724	SX3	SX3	Bark of Carya sp., primeval forest	Qinling Mountain, Shaanxi	2N	CHN-II	Duan et al., Nat Commun, 2018
1425	PRJNA396809	SRR7851725	SX4	SX4	Bark of a Fagaceae tree, primeval forest	Qinling Mountain, Shaanxi	2N	CHN-II	Duan et al., Nat Commun, 2018
1426	PRJNA396809	SRR7851722	SX5	SX5	Bark of Quercus fabri, primeval forest	Qinling Mountain, Shaanxi	2N	CHN-II	Duan et al., Nat Commun, 2018
1427	PRJNA396809	SRR7851723	SX6	SX6	Bark of Quercus fabri, primeval forest	Qinling Mountain, Shaanxi	2N	CHN-II	Duan et al., Nat Commun, 2018
1428	PRJNA396809	SRR7851728	SX7	SX7	Bark of a Fagaceae tree, primeval forest	Qinling Mountain, Shaanxi	2N	CHN-II	Duan et al., Nat Commun, 2018
1429	PRJNA396809	SRR7851729	SX8	SX8	Bark of Quercus fabri, primeval forest	Qinling Mountain, Shaanxi	2N+1	CHN-II	Duan et al., Nat Commun, 2018
1430	PRJNA396809	SRR7851870	SX9	SX9	Tomato, orchard	Qinling Mountain, Shaanxi	2N	CHN-V	Duan et al., Nat Commun, 2018
1431	PRJNA396809	SRR7851861	SXJM1.1	SXJM1_1	Fermenting dough	Yuncheng, Shanxi	2N	Mantou-3	Duan et al., Nat Commun, 2018
1432	PRJNA396809	SRR7851746	SXJM4.1	SXJM4_1	Fermenting dough	Yuncheng, Shanxi	2N	MixOrigin	Duan et al., Nat Commun, 2018
1433	PRJNA396809	SRR7851832	SXJM6.6	SXJM6_6	Fermenting dough	Yuncheng, Shanxi	2N	Other	Duan et al., Nat Commun, 2018
1434	PRJNA396809	SRR7851860	SXJM9.5	SXJM9_5	Fermenting dough	Yuncheng, Shanxi	3N-3	Mantou-3	Duan et al., Nat Commun, 2018
1435	PRJNA396809	SRR7851880	TY1.4	TY1_4	Fermenting dough	Taiyuan, Shanxi	2N+3	Mantou-6	Duan et al., Nat Commun, 2018
1436	PRJNA396809	SRR7851879	TY1.5	TY1_5	Fermenting dough	Taiyuan, Shanxi	2N+3	Mantou-6	Duan et al., Nat Commun, 2018
1437	PRJNA396809	SRR7851882	TY2.1	TY2_1	Fermenting dough	Taiyuan, Shanxi	2N+1	Mantou-6	Duan et al., Nat Commun, 2018
1438	PRJNA396809	SRR7851881	TY3.9	TY3_9	Fermenting dough	Taiyuan, Shanxi	2N+3	Mantou-6	Duan et al., Nat Commun, 2018
1439	PRJNA396809	SRR7851925	WJM5.2	WJM5_2	Fermenting dough	Juancheng, Shandong	2N+4	Mantou-2	Duan et al., Nat Commun, 2018
1440	PRJNA396809	SRR7851928	WJZ1.2	WJZ1_2	Fermenting dough	Juancheng, Shandong	2N+2	Mantou-2	Duan et al., Nat Commun, 2018
1441	PRJNA396809	SRR7851859	WL1	WL1	Fermenting dough	Wulanchabu, Inner Mongolia	2N+1	Mantou-3	Duan et al., Nat Commun, 2018
1442	PRJNA396809	SRR7851866	WL2	WL2	Fermenting dough	Wulanchabu, Inner Mongolia	2N+4	Mantou-3	Duan et al., Nat Commun, 2018
1443	PRJNA396809	SRR7851712	WL3	WL3	Fermenting dough	Wulanchabu, Inner Mongolia	2N+4	Mantou-1	Duan et al., Nat Commun, 2018
1444	PRJNA396809	SRR7851865	WL4	WL4	Fermenting dough	Wulanchabu, Inner Mongolia	2N+3	Mantou-3	Duan et al., Nat Commun, 2018
1445	PRJNA396809	SRR7851686	WM11-3	WM11_3	Fermented mixed goat and yak milk	Mongolia	2N+1	DairyProducts	Duan et al., Nat Commun, 2018
1446	PRJNA396809	SRR7851685	WM7-1	WM7_1	Fermented goat milk	Mongolia	2N	DairyProducts	Duan et al., Nat Commun, 2018
1447	PRJNA396809	SRR7851941	XJ1	XJ1	Soil, orchard	Xinjiang	2N	CHN-VI	Duan et al., Nat Commun, 2018
1448	PRJNA396809	SRR7851719	XJ2	XJ2	Apple, orchard	Korla, Xinjiang	2N	MosaicsR3	Duan et al., Nat Commun, 2018
1449	PRJNA396809	SRR7851750	XJ4	XJ4	Grape, orchard	Korla, Xinjiang	2N+2	MosaicsR3	Duan et al., Nat Commun, 2018
1450	PRJNA396809	SRR7851787	XJ5	XJ5	Grape, vineyard	Korla, Xinjiang	2N+1-1	Other	Duan et al., Nat Commun, 2018
1451	PRJNA396809	SRR7851935	XJ6	XJ6	Pear, orchard	Korla, Xinjiang	2N	CHN-VI	Duan et al., Nat Commun, 2018
1452	PRJNA396809	SRR7851936	XJ7	XJ7	Pear, orchard	Korla, Xinjiang	2N	CHN-VI	Duan et al., Nat Commun, 2018
1453	PRJNA396809	SRR7851718	XJ7.3	XJ7_3	Fermenting dough	Yili, Xinjiang	2N	MosaicsR3	Duan et al., Nat Commun, 2018
1454	PRJNA396809	SRR7851783	XST	XST	Active dry yeast	Xiangfan, Hubei	2N-3	MixOrigin	Duan et al., Nat Commun, 2018
1455	PRJNA396809	SRR7851735	XXY26L.1	XXY26L_1	Bark, primeval forest	Xiangxiyuan, Shennongjia, Hubei	2N	CHN-IX	Duan et al., Nat Commun, 2018
1456	PRJNA396809	SRR7851732	XXY30L.2	XXY30L_2	Bark, primeval forest	Xiangxiyuan, Shennongjia, Hubei	2N	CHN-IX	Duan et al., Nat Commun, 2018
1457	PRJNA396809	SRR7851931	XXYS1.4	XXYS1_4	Bark, primeval forest	Xiangxiyuan, Shennongjia, Hubei	2N	CHN-IX	Duan et al., Nat Commun, 2018
1458	PRJNA396809	SRR7851759	XXYS14.1	XXYS14_1	Bark, primeval forest	Xiangxiyuan, Shennongjia, Hubei	2N	CHN-IX	Duan et al., Nat Commun, 2018
1459	PRJNA396809	SRR7851837	XZ10.1	XZ10_1	Daqu (starter) of Qingkejiu (highland barley wine)	Gongga, Tibet	2N	Other	Duan et al., Nat Commun, 2018
1460	PRJNA396809	SRR7851834	XZ2.1	XZ2_1	Daqu (starter) of Qingkejiu (highland barley wine)	Lasa, Tibet	2N	Other	Duan et al., Nat Commun, 2018
1461	PRJNA396809	SRR7851833	XZ3.1	XZ3_1	Daqu (starter) of Qingkejiu (highland barley wine)	Dazi, Tibet	2N	Other	Duan et al., Nat Commun, 2018
1462	PRJNA396809	SRR7851836	XZ4.1	XZ4_1	Daqu (starter) of Qingkejiu (highland barley wine)	Gongbujiangda, Tibet	2N	Other	Duan et al., Nat Commun, 2018
1463	PRJNA396809	SRR7851835	XZ4.2	XZ4_2	Daqu (starter) of Qingkejiu (highland barley wine)	Gongbujiangda, Tibet	2N	Other	Duan et al., Nat Commun, 2018
1464	PRJNA396809	SRR7851838	XZ7	XZ7	Daqu (starter) of Qingkejiu (highland barley wine)	Nielamu, Tibet	2N	Other	Duan et al., Nat Commun, 2018
1465	PRJNA396809	SRR7851803	YM3.1	YM3_1	Fermenting dough	Ordos, Inner Mongolia	3N	Other	Duan et al., Nat Commun, 2018
1466	PRJNA396809	SRR7851937	YN1	YN1	Pineapple, orchard	Jinghong, Yunnan	2N	CHN-VI	Duan et al., Nat Commun, 2018
1467	PRJNA396809	SRR7851848	YN5	YN5	Soil, suburban tree	Dali, Yunnan	2N	CHN-VI	Duan et al., Nat Commun, 2018
1468	PRJNA396809	SRR7851760	YN6	YN6	Bark of Castanopsis orthacantha, suburban tree	Zixi Mountain, Yunnan	2N+3	CHN-VI	Duan et al., Nat Commun, 2018
1469	PRJNA323691	SRR5678584	BE001	BE001	Beer	Belgium	3	Beer	Gallone et al., Cell, 2016
1470	PRJNA323691	SRR5678585	BE002	BE002	Beer	Bulgaria	2	MosaicsBeer	Gallone et al., Cell, 2016
1471	PRJNA323691	SRR5678608	BE003	BE003	Beer	Ukraine	NA	MosaicsBeer	Gallone et al., Cell, 2016
1472	PRJNA323691	SRR5678609	BE004	BE004	Beer	Belgium	2 – 4	MosaicsBeer	Gallone et al., Cell, 2016
1473	PRJNA323691	SRR5678606	BE005	BE005	Beer	Belgium	4	MixOrigin	Gallone et al., Cell, 2016
1474	PRJNA323691	SRR5678607	BE006	BE006	Beer	Unknown	4	MixOrigin	Gallone et al., Cell, 2016
1475	PRJNA323691	SRR5678596	BE007	BE007	Beer	USA	4	Beer	Gallone et al., Cell, 2016
1476	PRJNA323691	SRR5678600	BE008	BE008	Beer	Germany	4	Beer	Gallone et al., Cell, 2016
1477	PRJNA323691	SRR5678576	BE009	BE009	Beer	England	4	Beer	Gallone et al., Cell, 2016
1478	PRJNA323691	SRR5678577	BE010	BE010	Beer	Scotland	4	Beer	Gallone et al., Cell, 2016
1479	PRJNA323691	SRR5678570	BE011	BE011	Beer	Belgium	2	MosaicsBeer	Gallone et al., Cell, 2016
1480	PRJNA323691	SRR5678571	BE012	BE012	Beer	England	4	Beer	Gallone et al., Cell, 2016
1481	PRJNA323691	SRR5678568	BE013	BE013	Beer	Belgium	2	MosaicsBeer	Gallone et al., Cell, 2016
1482	PRJNA323691	SRR5678569	BE014	BE014	Beer	Belgium	4	WineEuropean	Gallone et al., Cell, 2016
1483	PRJNA323691	SRR5678566	BE015	BE015	Beer	Belgium	3	Beer	Gallone et al., Cell, 2016
1484	PRJNA323691	SRR5678567	BE016	BE016	Beer	Belgium	3	Beer	Gallone et al., Cell, 2016
1485	PRJNA323691	SRR5678564	BE017	BE017	Beer	Belgium	4	Beer	Gallone et al., Cell, 2016
1486	PRJNA323691	SRR5678565	BE018	BE018	Beer	Canada	2	MosaicsR3	Gallone et al., Cell, 2016
1487	PRJNA323691	SRR5678572	BE019	BE019	Beer	Belgium	3	Beer	Gallone et al., Cell, 2016
1488	PRJNA323691	SRR5678573	BE020	BE020	Beer	Belgium	2	WineEuropean2	Gallone et al., Cell, 2016
1489	PRJNA323691	SRR5678680	BE021	BE021	Beer	Canada	2	MosaicsBeer	Gallone et al., Cell, 2016
1490	PRJNA323691	SRR5678679	BE022	BE022	Beer	Belgium	4	Beer	Gallone et al., Cell, 2016
1491	PRJNA323691	SRR5678678	BE023	BE023	Beer	Belgium	4	MixOrigin	Gallone et al., Cell, 2016
1492	PRJNA323691	SRR5678677	BE024	BE024	Beer	Belgium	2 – 4	WineEuropean	Gallone et al., Cell, 2016
1493	PRJNA323691	SRR5678676	BE025	BE025	Beer	Belgium	4	MixOrigin	Gallone et al., Cell, 2016
1494	PRJNA323691	SRR5678675	BE026	BE026	Beer	Belgium	4	Beer	Gallone et al., Cell, 2016
1495	PRJNA323691	SRR5678674	BE027	BE027	Beer	Belgium	2	MosaicsBeer	Gallone et al., Cell, 2016
1496	PRJNA323691	SRR5678673	BE028	BE028	Beer	Belgium	4	MixOrigin	Gallone et al., Cell, 2016
1497	PRJNA323691	SRR5678672	BE029	BE029	Beer	Belgium	4	MixOrigin	Gallone et al., Cell, 2016
1498	PRJNA323691	SRR5678671	BE030	BE030	Beer	Belgium	4	WineEuropean	Gallone et al., Cell, 2016
1499	PRJNA323691	SRR5678683	BE031	BE031	Beer	Belgium	4	Beer	Gallone et al., Cell, 2016
1500	PRJNA323691	SRR5678684	BE032	BE032	Beer	England	2	MosaicsBeer	Gallone et al., Cell, 2016
1501	PRJNA323691	SRR5678685	BE033	BE033	Beer	England	2	WineEuropean	Gallone et al., Cell, 2016
1502	PRJNA323691	SRR5678686	BE034	BE034	Beer	Belgium	3	MosaicsBeer	Gallone et al., Cell, 2016
1503	PRJNA323691	SRR5678687	BE035	BE035	Beer	Belgium (UK origin)	4	Beer	Gallone et al., Cell, 2016
1504	PRJNA323691	SRR5678688	BE036	BE036	Beer	Belgium (UK origin)	4	Beer	Gallone et al., Cell, 2016
1505	PRJNA323691	SRR5678689	BE037	BE037	Beer	Belgium (UK origin)	4	Beer	Gallone et al., Cell, 2016
1506	PRJNA323691	SRR5678690	BE038	BE038	Beer	Unknown	4	MixOrigin	Gallone et al., Cell, 2016
1507	PRJNA323691	SRR5678681	BE039	BE039	Beer	Czech	2	MosaicsBeer	Gallone et al., Cell, 2016
1508	PRJNA323691	SRR5678682	BE040	BE040	Beer	USA	2	MosaicsBeer	Gallone et al., Cell, 2016
1509	PRJNA323691	SRR5678616	BE041	BE041	Beer	Belgium	3	Beer	Gallone et al., Cell, 2016
1510	PRJNA323691	SRR5678615	BE042	BE042	Beer	Belgium	3	Beer	Gallone et al., Cell, 2016
1511	PRJNA323691	SRR5678618	BE043	BE043	Beer	Belgium	4	Beer	Gallone et al., Cell, 2016
1512	PRJNA323691	SRR5688140	BE044	BE044	Beer	USA - California	4	Beer	Gallone et al., Cell, 2016
1513	PRJNA323691	SRR5688142	BE045	BE045	Beer	England	4	Beer	Gallone et al., Cell, 2016
1514	PRJNA323691	SRR5688144	BE046	BE046	Beer	Germany	3	Beer	Gallone et al., Cell, 2016
1515	PRJNA323691	SRR5688146	BE047	BE047	Beer	Ireland	4	Beer	Gallone et al., Cell, 2016
1516	PRJNA323691	SRR5688148	BE048	BE048	Beer	England	4	Beer	Gallone et al., Cell, 2016
1517	PRJNA323691	SRR5688150	BE049	BE049	Beer	England	4	Beer	Gallone et al., Cell, 2016
1518	PRJNA323691	SRR5688152	BE050	BE050	Beer	England	4	Beer	Gallone et al., Cell, 2016
1519	PRJNA323691	SRR5688154	BE051	BE051	Beer	USA - East Coast	NA	Beer	Gallone et al., Cell, 2016
1520	PRJNA323691	SRR5688156	BE052	BE052	Beer	Australia	5	Beer	Gallone et al., Cell, 2016
1521	PRJNA323691	SRR5688158	BE053	BE053	Beer	Europe	4	Beer	Gallone et al., Cell, 2016
1522	PRJNA323691	SRR5688160	BE054	BE054	Beer	England	NA	Beer	Gallone et al., Cell, 2016
1523	PRJNA323691	SRR5688162	BE055	BE055	Beer	England	3	Beer	Gallone et al., Cell, 2016
1524	PRJNA323691	SRR5688164	BE056	BE056	Beer	England	4	Beer	Gallone et al., Cell, 2016
1525	PRJNA323691	SRR5688166	BE057	BE057	Beer	England	4	Beer	Gallone et al., Cell, 2016
1526	PRJNA323691	SRR5688168	BE058	BE058	Beer	England	4	Beer	Gallone et al., Cell, 2016
1527	PRJNA323691	SRR5688170	BE059	BE059	Beer	England	4	MosaicsBeer	Gallone et al., Cell, 2016
1528	PRJNA323691	SRR5688172	BE060	BE060	Beer	Scotland	4	Beer	Gallone et al., Cell, 2016
1529	PRJNA323691	SRR5688174	BE061	BE061	Beer	Germany	4	MixOrigin	Gallone et al., Cell, 2016
1530	PRJNA323691	SRR5688176	BE062	BE062	Beer	England	4	MosaicsBeer	Gallone et al., Cell, 2016
1531	PRJNA323691	SRR5688178	BE063	BE063	Beer	England	4	MosaicsBeer	Gallone et al., Cell, 2016
1532	PRJNA323691	SRR5688180	BE064	BE064	Beer	England	4	Beer	Gallone et al., Cell, 2016
1533	PRJNA323691	SRR5688182	BE065	BE065	Beer	USA - California	4	Beer	Gallone et al., Cell, 2016
1534	PRJNA323691	SRR5688184	BE066	BE066	Beer	USA - Pacific North West America	4	Beer	Gallone et al., Cell, 2016
1535	PRJNA323691	SRR5688186	BE067	BE067	Beer	England	4	Beer	Gallone et al., Cell, 2016
1536	PRJNA323691	SRR5688188	BE068	BE068	Beer	USA - California	4	Beer	Gallone et al., Cell, 2016
1537	PRJNA323691	SRR5688190	BE069	BE069	Beer	USA - California	4	Beer	Gallone et al., Cell, 2016
1538	PRJNA323691	SRR5688192	BE070	BE070	Beer	France	4	Beer	Gallone et al., Cell, 2016
1539	PRJNA323691	SRR5688194	BE071	BE071	Beer	USA - San Diego	4	Beer	Gallone et al., Cell, 2016
1540	PRJNA323691	SRR5688196	BE072	BE072	Beer	Germany	NA	Beer	Gallone et al., Cell, 2016
1541	PRJNA323691	SRR5688198	BE073	BE073	Beer	Germany	4	Beer	Gallone et al., Cell, 2016
1542	PRJNA323691	SRR5688200	BE074	BE074	Beer	Germany	4	Beer	Gallone et al., Cell, 2016
1543	PRJNA323691	SRR5688202	BE075	BE075	Beer	Belgium	4	Beer	Gallone et al., Cell, 2016
1544	PRJNA323691	SRR5688204	BE076	BE076	Beer	Belgium	4	Beer	Gallone et al., Cell, 2016
1545	PRJNA323691	SRR5688206	BE077	BE077	Beer	Belgium	4	Beer	Gallone et al., Cell, 2016
1546	PRJNA323691	SRR5688208	BE078	BE078	Beer	Belgium	4	Beer	Gallone et al., Cell, 2016
1547	PRJNA323691	SRR5688210	BE079	BE079	Beer	Belgium	4	Beer	Gallone et al., Cell, 2016
1548	PRJNA323691	SRR5688212	BE080	BE080	Beer	Belgium	2 – 4	MosaicsBeer	Gallone et al., Cell, 2016
1549	PRJNA323691	SRR5688214	BE081	BE081	Beer	Belgium	4	Beer	Gallone et al., Cell, 2016
1550	PRJNA323691	SRR5688216	BE082	BE082	Beer	Belgium	4	Beer	Gallone et al., Cell, 2016
1551	PRJNA323691	SRR5688218	BE083	BE083	Beer	Belgium	NA	MosaicsBeer	Gallone et al., Cell, 2016
1552	PRJNA323691	SRR5688220	BE084	BE084	Beer	Belgium	2	MosaicsBeer	Gallone et al., Cell, 2016
1553	PRJNA323691	SRR5688222	BE085	BE085	Beer	Belgium	2	MosaicsBeer	Gallone et al., Cell, 2016
1554	PRJNA323691	SRR5688224	BE086	BE086	Beer	Belgium	2	MosaicsBeer	Gallone et al., Cell, 2016
1555	PRJNA323691	SRR5688226	BE087	BE087	Beer	Germany	4	Beer	Gallone et al., Cell, 2016
1556	PRJNA323691	SRR5688228	BE088	BE088	Beer	NP	2 – 4	WineEuropean	Gallone et al., Cell, 2016
1557	PRJNA323691	SRR5688230	BE089	BE089	Beer	NP	NA	Beer	Gallone et al., Cell, 2016
1558	PRJNA323691	SRR5688232	BE090	BE090	Beer	England	4	Beer	Gallone et al., Cell, 2016
1559	PRJNA323691	SRR5688234	BE091	BE091	Beer	Germany	4	MosaicsBeer	Gallone et al., Cell, 2016
1560	PRJNA323691	SRR5688236	BE092	BE092	Beer	Belgium	4	MosaicsBeer	Gallone et al., Cell, 2016
1561	PRJNA323691	SRR5688238	BE093	BE093	Beer	Germany	4	Beer	Gallone et al., Cell, 2016
1562	PRJNA323691	SRR5688240	BE094	BE094	Beer	Germany	4	Beer	Gallone et al., Cell, 2016
1563	PRJNA323691	SRR5688242	BE095	BE095	Beer	NP	4	Beer	Gallone et al., Cell, 2016
1564	PRJNA323691	SRR5688244	BE096	BE096	Beer	NP	4	Beer	Gallone et al., Cell, 2016
1565	PRJNA323691	SRR5688246	BE097	BE097	Beer	NP	4	Beer	Gallone et al., Cell, 2016
1566	PRJNA323691	SRR5688248	BE098	BE098	Beer	USA - California	4	Beer	Gallone et al., Cell, 2016
1567	PRJNA323691	SRR5688250	BE099	BE099	Beer	England	4	Beer	Gallone et al., Cell, 2016
1568	PRJNA323691	SRR5688252	BE100	BE100	Beer	England	4	Beer	Gallone et al., Cell, 2016
1569	PRJNA323691	SRR5688254	BE101	BE101	Beer	England	4	Beer	Gallone et al., Cell, 2016
1570	PRJNA323691	SRR5688256	BE102	BE102	Beer	USA	4	Beer	Gallone et al., Cell, 2016
1571	PRJNA323691	SRR5678612	BI001	BI001	bioethanol	China	2	Huangjiu	Gallone et al., Cell, 2016
1572	PRJNA323691	SRR5678610	BI002	BI002	bioethanol	Brazil	2	Bioethanol	Gallone et al., Cell, 2016
1573	PRJNA323691	SRR5678579	BI003	BI003	bioethanol	China	2 – 4	Huangjiu	Gallone et al., Cell, 2016
1574	PRJNA323691	SRR5678578	BI004	BI004	bioethanol	China	2	Huangjiu	Gallone et al., Cell, 2016
1575	PRJNA323691	SRR5678581	BI005	BI005	bioethanol	Brazil	2	Bioethanol	Gallone et al., Cell, 2016
1576	PRJNA323691	SRR5678580	BR001	BR001	Bread	Unknown	4	MixOrigin	Gallone et al., Cell, 2016
1577	PRJNA323691	SRR5678575	BR002	BR002	Bread	Belgium	4	MixOrigin	Gallone et al., Cell, 2016
1578	PRJNA323691	SRR5678574	BR003	BR003	Bread	Belgium	2	MixOrigin	Gallone et al., Cell, 2016
1579	PRJNA323691	SRR5678552	BR004	BR004	Bread	Belgium	4	MixOrigin	Gallone et al., Cell, 2016
1580	PRJNA323691	SRR5678553	LA001	LA001	Lab strain	Lab cross	2	MosaicsR3	Gallone et al., Cell, 2016
1581	PRJNA323691	SRR5688258	LA002	LA002	Lab strain	Lab cross	2	MosaicsR3	Gallone et al., Cell, 2016
1582	PRJNA323691	SRR5678551	SA001	SA001	Sake	Japan	2	Sake-A	Gallone et al., Cell, 2016
1583	PRJNA323691	SRR5678548	SA002	SA002	Sake	Japan	2	WineEuropean	Gallone et al., Cell, 2016
1584	PRJNA323691	SRR5678546	SA004	SA004	Sake	Japan	3	Sake-A	Gallone et al., Cell, 2016
1585	PRJNA323691	SRR5678547	SA005	SA005	Sake	Japan	2	Sake-A	Gallone et al., Cell, 2016
1586	PRJNA323691	SRR5678544	SA006	SA006	Sake	Japan	2	Sake-A	Gallone et al., Cell, 2016
1587	PRJNA323691	SRR5678545	SA007	SA007	Sake	Japan	2	Sake-A	Gallone et al., Cell, 2016
1588	PRJNA323691	SRR5678664	SP001	SP001	Spirit	Unknown	4	MixOrigin	Gallone et al., Cell, 2016
1589	PRJNA323691	SRR5678663	SP002	SP002	Spirit	France	2	WineEuropean	Gallone et al., Cell, 2016
1590	PRJNA323691	SRR5678662	SP003	SP003	Spirit	Unknown	4	MixOrigin	Gallone et al., Cell, 2016
1591	PRJNA323691	SRR5678661	SP004	SP004	Spirit	Brazil	2	SouthAmericaMix3	Gallone et al., Cell, 2016
1592	PRJNA323691	SRR5678668	SP005	SP005	Spirit	Brazil	4	Beer	Gallone et al., Cell, 2016
1593	PRJNA323691	SRR5678667	SP006	SP006	Spirit	Brazil	2	SouthAmericaMix3	Gallone et al., Cell, 2016
1594	PRJNA323691	SRR5678666	SP007	SP007	Spirit	Scotland	3	Other	Gallone et al., Cell, 2016
1595	PRJNA323691	SRR5688260	SP008	SP008	Spirit	Scotland	3	Other	Gallone et al., Cell, 2016
1596	PRJNA323691	SRR5688262	SP009	SP009	Spirit	USA - Tennesee	4	Other	Gallone et al., Cell, 2016
1597	PRJNA323691	SRR5688264	SP010	SP010	Spirit	Unknown	3	Other	Gallone et al., Cell, 2016
1598	PRJNA323691	SRR5688266	SP011	SP011	Spirit	Unknown	2	WineEuropean	Gallone et al., Cell, 2016
1599	PRJNA323691	SRR5678636	WI001	WI001	Wine	France	2	WineEuropean	Gallone et al., Cell, 2016
1600	PRJNA323691	SRR5678637	WI002	WI002	Wine	Russia	2	CHN-IV	Gallone et al., Cell, 2016
1601	PRJNA323691	SRR5678638	WI003	WI003	Wine	France	2	WineEuropean	Gallone et al., Cell, 2016
1602	PRJNA323691	SRR5678631	WI004	WI004	Wine	Germany	2	WineEuropean	Gallone et al., Cell, 2016
1603	PRJNA323691	SRR5678632	WI005	WI005	Wine	Germany	2	WineEuropean	Gallone et al., Cell, 2016
1604	PRJNA323691	SRR5678633	WI006	WI006	Wine	Germany	2	WineEuropean1	Gallone et al., Cell, 2016
1605	PRJNA323691	SRR5678634	WI007	WI007	Wine	Germany	2	WineEuropean	Gallone et al., Cell, 2016
1606	PRJNA323691	SRR5678640	WI009	WI009	Wine	Unknown	2	WineEuropean	Gallone et al., Cell, 2016
1607	PRJNA323691	SRR5678652	WI010	WI010	Wine	Germany	2	WineEuropean	Gallone et al., Cell, 2016
1608	PRJNA323691	SRR5678651	WI011	WI011	Wine	France	2	WineEuropean	Gallone et al., Cell, 2016
1609	PRJNA323691	SRR5678654	WI012	WI012	Wine	France	4	Beer	Gallone et al., Cell, 2016
1610	PRJNA323691	SRR5678653	WI013	WI013	Wine	Unknown	4	WineEuropean	Gallone et al., Cell, 2016
1611	PRJNA323691	SRR5678656	WI014	WI014	Wine	France	2	WineEuropean4	Gallone et al., Cell, 2016
1612	PRJNA323691	SRR5678655	WI015	WI015	Wine	Germany	2	WineEuropean	Gallone et al., Cell, 2016
1613	PRJNA323691	SRR5678658	WI016	WI016	Wine	France	2	MosaicsR3	Gallone et al., Cell, 2016
1614	PRJNA323691	SRR5678657	WI017	WI017	Wine	Italy	4	WineEuropean	Gallone et al., Cell, 2016
1615	PRJNA323691	SRR5678660	WI018	WI018	Wine	Spain	2	WineEuropean	Gallone et al., Cell, 2016
1616	PRJNA323691	SRR5688274	WI019	WI019	Wine	Unknown	2	MosaicsBeer	Gallone et al., Cell, 2016
1617	PRJNA323691	SRR5678626	WL001	WL001	Wild	Unknown	2	WestAfricanCocoa	Gallone et al., Cell, 2016
1618	PRJNA323691	SRR5678627	WL002	WL002	Wild	Ghana	2	WestAfricanCocoa	Gallone et al., Cell, 2016
1619	PRJNA323691	SRR5678624	WL003	WL003	Wild	Ghana	2	WestAfricanCocoa	Gallone et al., Cell, 2016
1620	PRJNA323691	SRR5678625	WL004	WL004	Wild	Ivory coast	2	SouthAmericaMix1	Gallone et al., Cell, 2016
1621	PRJNA323691	SRR5688268	WL005	WL005	Wild	USA	2	MixOrigin	Gallone et al., Cell, 2016
1622	PRJNA323691	SRR5688270	WL006	WL006	Wild	Denmark	4	MixOrigin	Gallone et al., Cell, 2016
1623	PRJNA323691	SRR5688272	WL007	WL007	Wild	Denmark	4	MixOrigin	Gallone et al., Cell, 2016
1624	PRJEB13332	ERR1352871	CBS 1598	CBS1598	Sake	Nakazawa, Japan	NA	Sake-A	Gonçalves et al., 2016
1625	PRJEB13332	ERR1352869	CBS 435	CBS435	Sake	Nakazawa, Japan	2 – 4	Sake-A	Gonçalves et al., 2016
1626	PRJEB13332	ERR1352843	Fermicru 4F9	Fermicru4F9	Commercial	NA	NA	WineEuropean	Gonçalves et al., 2016
1627	PRJEB13332	ERR1352873	NRRL-Y-11572	NRRL_Y_11572	Sake	Japan	NA	Sake-B	Gonçalves et al., 2016
1628	PRJEB13332	ERR1352876	TUM 127	TUM127	beer	Freising-Weihenstephan, Germany	NA	AsianFermentation	Gonçalves et al., 2016
1629	PRJEB13332	ERR1352854	TUM 148	TUM148	Alt beer	Düsseldorf, Germany	NA	Beer	Gonçalves et al., 2016
1630	PRJEB13332	ERR1352845	TUM 149	TUM149	Wheat beer	Munich, Germany	NA	Beer	Gonçalves et al., 2016
1631	PRJEB13332	ERR1352860	TUM 165	TUM165	British ale	Burton‐upon‐Trend, Great Britain	NA	Beer	Gonçalves et al., 2016
1632	PRJEB13332	ERR1352853	TUM 174	TUM174	Regional beer	Mülheim, Germany	NA	Beer	Gonçalves et al., 2016
1633	PRJEB13332	ERR1352847	TUM 175	TUM175	Wheat beer	Freising‐Weihenstephan, Germany	4	Beer	Gonçalves et al., 2016
1634	PRJEB13332	ERR1352852	TUM 177	TUM177	Kölsch beer	Krefeld, Germany	NA	Beer	Gonçalves et al., 2016
1635	PRJEB13332	ERR1352872	TUM 184	TUM184	Alt beer	Düsseldorf, Germany	NA	Sake-A	Gonçalves et al., 2016
1636	PRJEB13332	ERR1352846	TUM 205	TUM205	Wheat beer	Würzburg, Germany	3	Beer	Gonçalves et al., 2016
1637	PRJEB13332	ERR1352863	TUM 210	TUM210	British ale	Great Britain	NA	Beer	Gonçalves et al., 2016
1638	PRJEB13332	ERR1352864	TUM 211	TUM211	British ale	Great Britain	NA	Beer	Gonçalves et al., 2016
1639	PRJEB13332	ERR1352856	TUM 213	TUM213	British ale	Great Britain	4	Beer	Gonçalves et al., 2016
1640	PRJEB13332	ERR1352851	TUM 308	TUM308	Alt beer	Rhineland-Palatinate, Germany	4	Beer	Gonçalves et al., 2016
1641	PRJEB13332	ERR1352855	TUM 338	TUM338	Alt beer	Düsseldorf, Germany	4	Beer	Gonçalves et al., 2016
1642	PRJEB13332	ERR1352874	TUM 380	TUM380	Lambic beer	Belgium	2 – 4	AsianFermentation	Gonçalves et al., 2016
1643	PRJEB13332	ERR1352844	TUM 381	TUM381	Belgian beer	Belgium	4	Beer	Gonçalves et al., 2016
1644	PRJEB13332	ERR1352868	TUM 480	TUM480	Opaque bee	South Africa	2 – 4	MixOrigin	Gonçalves et al., 2016
1645	PRJEB13332	ERR1352866	TUM 506	TUM506	British ale	Great Britain	3	MixOrigin	Gonçalves et al., 2016
1646	PRJEB13332	ERR1352848	TUM 507	TUM507	Ale Beer	Unknown	NA	Beer	Gonçalves et al., 2016
1647	PRJEB13332	ERR1352862	TUM 508	TUM508	Irish ale	Ireland	4	Beer	Gonçalves et al., 2016
1648	PRJEB13332	ERR1352842	TUM 511	TUM511	California ale	Unknown	NA	WineEuropean	Gonçalves et al., 2016
1649	PRJEB13332	ERR1352850	TUM 513	TUM513	California ale	Unknown	4	Beer	Gonçalves et al., 2016
1650	PRJEB13332	ERR1352879	UWO 03-433.3	UWO03_433_3	Nectar of Bertram palm	Malaysia	NA	Malaysian	Gonçalves et al., 2016
1651	PRJEB24932	ERR2299966	UFMG-CM-Y215	UFMG_CM_Y215	Cachaça	São Paulo, Brazil	NA	WineEuropean	Barbosa et al., MBE, 2018
1652	PRJEB24932	ERR2299967	UFMG-CM-Y223	UFMG_CM_Y223	Cachaça	Rio de Janeiro, Brazil	2 – 4	MixOrigin	Barbosa et al., MBE, 2018
1653	PRJEB24932	ERR2299968	UFMG-CM-Y228	UFMG_CM_Y228	Cachaça	São Paulo, Brazil	3	MixOrigin	Barbosa et al., MBE, 2018
1654	PRJEB24932	ERR2299969	UFMG-CM-Y251	UFMG_CM_Y251	Cachaça	Santa Catarina, Brazil	2 – 4	SouthAmericaMix3	Barbosa et al., MBE, 2018
1655	PRJEB24932	ERR2299970	UFMG-CM-Y617	UFMG_CM_Y617	Wine	Santa Bárbara, Minas Gerais,	NA	WineEuropean	Barbosa et al., MBE, 2018
1656	PRJEB24932	ERR2299971	UFMG-CM-Y618	UFMG_CM_Y618	Wine	Santa Bárbara, Minas Gerais,	NA	WineEuropean	Barbosa et al., MBE, 2018
1657	PRJEB24932	ERR2299972	UFMG-CM-Y619	UFMG_CM_Y619	Wine	Santa Bárbara, Minas Gerais,	NA	WineEuropean	Barbosa et al., MBE, 2018
1658	PRJEB24932	ERR2299973	UFMG_CM_Y620	UFMG_CM_Y620	Wine	Casa Nova, Bahia, Brazil	NA	WineEuropean	Barbosa et al., MBE, 2018
1659	PRJEB24932	ERR2299974	UFMG_CM_Y621	UFMG_CM_Y621	Wine	Casa Nova, Bahia, Brazil	NA	WineEuropean	Barbosa et al., MBE, 2018
1660	PRJEB24932	ERR2299975	UFMG-CM-Y622	UFMG_CM_Y622	Cachaça	Pernambuco, Brazil	2 – 4	MixOrigin	Barbosa et al., MBE, 2018
1661	PRJEB24932	ERR2299976	UFMG-CM-Y627	UFMG_CM_Y627	Cachaça	Rio de Janeiro, Brazil	NA	SouthAmericaMix3	Barbosa et al., MBE, 2018
1662	PRJEB24932	ERR2299977	UFMG-CM-Y628	UFMG_CM_Y628	Cachaça	Rio de Janeiro, Brazil	NA	MosaicsR3	Barbosa et al., MBE, 2018
1663	PRJEB24932	ERR2299978	UFMG-CM-Y629	UFMG_CM_Y629	Cachaça	Pernambuco, Brazil	NA	SouthAmericaMix3	Barbosa et al., MBE, 2018
1664	PRJEB24932	ERR2299979	UFMG-CM-Y630	UFMG_CM_Y630	Cachaça	Santa Catarina, Brazil	NA	SouthAmericaMix3	Barbosa et al., MBE, 2018
1665	PRJEB24932	ERR2299980	UFMG-CM-Y631	UFMG_CM_Y631	Cachaça	Santa Catarina, Brazil	NA	SouthAmericaMix3	Barbosa et al., MBE, 2018
1666	PRJEB24932	ERR2299981	UFMG-CM-Y632	UFMG_CM_Y632	Cachaça	Tocantis, Brasil	2 – 4	SouthAmericaMix3	Barbosa et al., MBE, 2018
1667	PRJEB24932	ERR2299982	UFMG-CM-Y633	UFMG_CM_Y633	Cachaça	Tocantis, Brasil	2 – 4	SouthAmericaMix3	Barbosa et al., MBE, 2018
1668	PRJEB24932	ERR2299983	UFMG-CM-Y634	UFMG_CM_Y634	Cachaça	Tocantis, Brasil	2 – 4	SouthAmericaMix3	Barbosa et al., MBE, 2018
1669	PRJEB24932	ERR2299984	UFMG-CM-Y635	UFMG_CM_Y635	Cachaça	Tocantis, Brasil	2 – 4	SouthAmericaMix3	Barbosa et al., MBE, 2018
1670	PRJEB24932	ERR2299985	UFMG-CM-Y637	UFMG_CM_Y637	Cachaça	Pernambuco, Brazil	NA	MosaicsR3	Barbosa et al., MBE, 2018
1671	PRJEB24932	ERR2299986	UFMG-CM-Y638	UFMG_CM_Y638	Cachaça	Tocantis, Brasil	NA	MosaicsR3	Barbosa et al., MBE, 2018
1672	PRJEB24932	ERR2299987	UFMG-CM-Y648	UFMG_CM_Y648	Cachaça	Tocantis, Brasil	NA	SouthAmericaMix1	Barbosa et al., MBE, 2018
1673	PRJEB24932	ERR2299988	AP13.1	AP13_1	Bread	Portugal	NA	MixOrigin	Barbosa et al., MBE, 2018
1674	PRJEB30431	ERR3010130	CBS 7002	CBS_7002	Alpechin	Sevilla,Spain	NA	Hybrid spore	Pontes et al., FrontGenet, 2019
1675	PRJEB11698	ERR1111503	UFMG-CM-Y652	UFMG_CM_Y652	Non identified tree	National Park Foz do Iguaçu, Paraná, Brazil	2 – 4	Hybrid	Barbosa et al., GBE, 2016
1676	PRJEB11698	ERR1111502	UFMG-CM-Y651	UFMG_CM_Y651	Non identified tree	National Park Foz do Iguaçu, Paraná, Brazil	2 – 4	Higly Introgressed	Barbosa et al., GBE, 2016
1677			OS162	Y5	Oak tree	UK	2	Hybrid	This study
1678			OS2389	P91 __ UCDFST 73-538.2	Slime under bark of Koa tree	Hawaii	2	Hybrid	This study

## Sheet: Table S3
Data markers
clades	sampnames	number_tot_markers	number_genotyped_markers	number_markers_discarded_missed	number_markers_discarded_missed_genic	number_markers_discarded_missed_intergenic	number_genotyped_genic_markers	number_genotyped_intergenic_markers	fraction_genotyped_markers_respect_to_the_total_available	fraction_markers_discarded_or_missed_respect_to_the_total_available	fraction_genotyped_genic_markers_respect_to_the_total_genotyped	fraction_genotyped_intergenic_markers_respect_to_the_total_genotyped
WineEuropean	BQEOSW	775500	637204	138296	51816	86481	507071	130133	0.821669	0.178331	0.795775	0.204225
WineEuropean	SA002	775500	619504	155996	63229	92768	495658	123846	0.798845	0.201155	0.800088	0.199912
WineEuropean	BLTOSW	775500	641112	134388	50007	84382	508880	132232	0.826708	0.173292	0.793746	0.206254
WineEuropean	BPKOSW	775500	629247	146253	58083	88171	500804	128443	0.811408	0.188592	0.795878	0.204122
WineEuropean	BNLOSW	775500	638758	136742	51031	85712	507856	130902	0.823672	0.176328	0.795068	0.204932
WineEuropean	BLROSW	775500	639022	136478	50946	85533	507941	131081	0.824013	0.175987	0.794872	0.205128
WineEuropean	BPFOSW	775500	640255	135245	50591	84655	508296	131959	0.825603	0.174397	0.793896	0.206104
WineEuropean	AQROSW	775500	575436	200064	101489	98576	457398	118038	0.742019	0.257981	0.794872	0.205128
WineEuropean	AIFOSW	775500	517013	258487	146827	111661	412060	104953	0.666683	0.333317	0.797001	0.202999
WineEuropean	BKIOSW	775500	638354	137146	51232	85915	507655	130699	0.823152	0.176848	0.795256	0.204744
WineEuropean	BPBOSW	775500	640629	134871	50274	84598	508613	132016	0.826085	0.173915	0.793928	0.206072
WineEuropean	BNVOSW	775500	638638	136862	51127	85736	507760	130878	0.823518	0.176482	0.795067	0.204933
WineEuropean	ABROSW	775500	638159	137341	51165	86177	507722	130437	0.8229	0.1771	0.795604	0.204396
WineEuropean	ABQOSW	775500	638610	136890	50879	86012	508008	130602	0.823482	0.176518	0.79549	0.20451
WineEuropean	SACE_YDO	775500	634513	140987	52722	88266	506165	128348	0.818199	0.181801	0.797722	0.202278
WineEuropean	SACE_YDF	775500	623615	151885	58502	93384	500385	123230	0.804146	0.195854	0.802394	0.197606
WineEuropean	APTOSW	775500	595552	179948	85905	94044	472982	122570	0.767959	0.232041	0.794191	0.205809
WineEuropean	BHVOSW	775500	638430	137070	51260	85811	507627	130803	0.82325	0.17675	0.795118	0.204882
WineEuropean	AGIOSW	775500	573303	202197	103298	98900	455589	117714	0.739269	0.260731	0.794674	0.205326
WineEuropean	BNEOSW	775500	638003	137497	51380	86118	507507	130496	0.822699	0.177301	0.795462	0.204538
WineEuropean	SACE_YBY	775500	643368	132132	48869	83264	510018	133350	0.829617	0.170383	0.792731	0.207269
WineEuropean	1014g5	775500	631956	143544	54541	89004	504346	127610	0.814901	0.185099	0.798071	0.201929
WineEuropean	1014_F5	775500	628953	146547	55863	90685	503024	125929	0.811029	0.188971	0.79978	0.20022
WineEuropean	BLAOSW	775500	638666	136834	50986	85849	507901	130765	0.823554	0.176446	0.795253	0.204747
WineEuropean	BLQOSW	775500	603359	172141	79368	92774	479519	123840	0.778026	0.221974	0.794749	0.205251
WineEuropean	BKKOSW	775500	638126	137374	51382	85993	507505	130621	0.822858	0.177142	0.795305	0.204695
WineEuropean	BKTOSW	775500	638005	137495	51364	86132	507523	130482	0.822701	0.177299	0.795484	0.204516
WineEuropean	BIBOSW	775500	638410	137090	51216	85875	507671	130739	0.823224	0.176776	0.795212	0.204788
WineEuropean	BKLOSW	775500	638628	136872	51015	85858	507872	130756	0.823505	0.176495	0.795255	0.204745
WineEuropean	BIAOSW	775500	637191	138309	51801	86509	507086	130105	0.821652	0.178348	0.795815	0.204185
WineEuropean	AHDOSW	775500	640823	134677	50018	84660	508869	131954	0.826335	0.173665	0.794087	0.205913
WineEuropean	AGFOSW	775500	644913	130587	48241	82347	510646	134267	0.831609	0.168391	0.791806	0.208194
WineEuropean	AQQOSW	775500	570371	205129	105034	100096	453853	116518	0.735488	0.264512	0.795715	0.204285
WineEuropean	AHEOSW	775500	609810	165690	73890	91801	484997	124813	0.786344	0.213656	0.795325	0.204675
WineEuropean	BQMOSW	775500	637137	138363	51524	86840	507363	129774	0.821582	0.178418	0.796317	0.203683
WineEuropean	BPTOSW	775500	639380	136120	50762	85359	508125	131255	0.824475	0.175525	0.794715	0.205285
WineEuropean	BQSOSW	775500	638691	136809	51133	85677	507754	130937	0.823586	0.176414	0.794992	0.205008
WineEuropean	EXF6761	775500	609485	166015	67330	98686	491557	117928	0.785925	0.214075	0.806512	0.193488
WineEuropean	BFKOSW	775500	639820	135680	50677	85004	508210	131610	0.825042	0.174958	0.794302	0.205698
WineEuropean	CIBOSW	775500	637302	138198	51762	86437	507125	130177	0.821795	0.178205	0.795737	0.204263
WineEuropean	BFROSW	775500	637896	137604	51322	86283	507565	130331	0.822561	0.177439	0.795686	0.204314
WineEuropean	CIAOSW	775500	638739	136761	51191	85571	507696	131043	0.823648	0.176352	0.794841	0.205159
WineEuropean	BFQOSW	775500	638615	136885	51040	85846	507847	130768	0.823488	0.176512	0.795232	0.204768
WineEuropean	BFCOSW	775500	638540	136960	50911	86050	507976	130564	0.823391	0.176609	0.795527	0.204473
WineEuropean	ASEOSW	775500	638201	137299	51180	86120	507707	130494	0.822954	0.177046	0.795528	0.204472
WineEuropean	ASDOSW	775500	638707	136793	51128	85666	507759	130948	0.823607	0.176393	0.79498	0.20502
WineEuropean	ALMOSW	775500	614822	160678	69567	91112	489320	125502	0.792807	0.207193	0.795873	0.204127
WineEuropean	ALLOSW	775500	639187	136313	50814	85500	508073	131114	0.824226	0.175774	0.794874	0.205126
WineEuropean	AVHOSW	775500	363604	411896	268972	142925	289915	73689	0.468864	0.531136	0.797337	0.202663
WineEuropean	SACE_YAD	775500	630769	144731	54516	90216	504371	126398	0.813371	0.186629	0.799613	0.200387
WineEuropean	AHROSW	775500	640079	135421	50237	85185	508650	131429	0.825376	0.174624	0.794668	0.205332
WineEuropean	AHGOSW	775500	610510	164990	74331	90660	484556	125954	0.787247	0.212753	0.793691	0.206309
WineEuropean	APSOSW	775500	556220	219280	116685	102596	442202	114018	0.71724	0.28276	0.795013	0.204987
WineEuropean	BESOSW	775500	638930	136570	51100	85471	507787	131143	0.823894	0.176106	0.794746	0.205254
WineEuropean	BEROSW	775500	639314	136186	50959	85228	507928	131386	0.824389	0.175611	0.794489	0.205511
WineEuropean	ARQOSW	775500	636301	139199	52194	87006	506693	129608	0.820504	0.179496	0.79631	0.20369
WineEuropean	ARCOSW	775500	594424	181076	86527	94550	472360	122064	0.766504	0.233496	0.794652	0.205348
WineEuropean	AGNOSW	775500	638620	136880	51046	85835	507841	130779	0.823495	0.176505	0.795216	0.204784
WineEuropean	ARKOSW	775500	561968	213532	112106	101427	446781	115187	0.724652	0.275348	0.795029	0.204971
WineEuropean	CFVOSW	775500	547000	228500	123630	104871	435257	111743	0.705351	0.294649	0.795717	0.204283
WineEuropean	APVOSW	775500	637079	138421	52071	86351	506816	130263	0.821507	0.178493	0.795531	0.204469
WineEuropean	SACE_YDC	775500	640047	135453	50566	84888	508321	131726	0.825335	0.174665	0.794193	0.205807
WineEuropean	SACE_YBN	775500	637790	137710	51466	86245	507421	130369	0.822424	0.177576	0.795593	0.204407
WineEuropean	AGLOSW	775500	648525	126975	46359	80617	512528	135997	0.836267	0.163733	0.790298	0.209702
WineEuropean	SACE_YAM	775500	629532	145968	55337	90632	503550	125982	0.811776	0.188224	0.79988	0.20012
WineEuropean	ABEOSW	775500	638316	137184	51004	86181	507883	130433	0.823103	0.176897	0.795661	0.204339
WineEuropean	BHFOSW	775500	639182	136318	50862	85457	508025	131157	0.824219	0.175781	0.794805	0.205195
WineEuropean	BHCOSW	775500	636727	138773	51894	86880	506993	129734	0.821054	0.178946	0.796249	0.203751
WineEuropean	ASGOSW	775500	508477	267023	155565	111459	403322	105155	0.655676	0.344324	0.793196	0.206804
WineEuropean	ARVOSW	775500	637835	137665	51522	86144	507365	130470	0.822482	0.177518	0.795449	0.204551
WineEuropean	AAIOSW	775500	639887	135613	50320	85294	508567	131320	0.825128	0.174872	0.794776	0.205224
WineEuropean	CBGOSW	775500	636296	139204	52270	86935	506617	129679	0.820498	0.179502	0.796197	0.203803
WineEuropean	ATHOSW	775500	637535	137965	51706	86260	507181	130354	0.822095	0.177905	0.795534	0.204466
WineEuropean	ACFOSW	775500	639090	136410	50661	85750	508226	130864	0.824101	0.175899	0.795234	0.204766
WineEuropean	AGHOSW	775500	638187	137313	51320	85994	507567	130620	0.822936	0.177064	0.795326	0.204674
WineEuropean	GMY321	775500	603202	172298	69642	102657	489245	113957	0.777823	0.222177	0.81108	0.18892
WineEuropean	ZP577	775500	608523	166977	67839	99139	491048	117475	0.784685	0.215315	0.806951	0.193049
WineEuropean	BTHOSW	775500	640466	135034	50259	84776	508628	131838	0.825875	0.174125	0.794153	0.205847
WineEuropean	ZP579	775500	615631	159869	62967	96903	495920	119711	0.79385	0.20615	0.805547	0.194453
WineEuropean	ZP578	775500	619657	155843	61322	94522	497565	122092	0.799042	0.200958	0.802968	0.197032
WineEuropean	L528	775500	629509	145991	55553	90439	503334	126175	0.811746	0.188254	0.799566	0.200434
WineEuropean	CDSOSW	775500	640357	135143	50377	84767	508510	131847	0.825734	0.174266	0.794104	0.205896
WineEuropean	ZP861	775500	631507	143993	54598	89396	504289	127218	0.814322	0.185678	0.798549	0.201451
WineEuropean	L561	775500	615252	160248	62673	97576	496214	119038	0.793362	0.206638	0.806522	0.193478
WineEuropean	L712	775500	611922	163578	64491	99088	494396	117526	0.789068	0.210932	0.80794	0.19206
WineEuropean	L461	775500	630352	145148	55181	89968	503706	126646	0.812833	0.187167	0.799087	0.200913
WineEuropean	WI015	775500	628565	146935	56061	90875	502826	125739	0.810529	0.189471	0.799959	0.200041
WineEuropean	ATAOSW	775500	639337	136163	50723	85441	508164	131173	0.824419	0.175581	0.79483	0.20517
WineEuropean	UFMG_CM_Y215	775500	674043	101457	26923	74535	531964	142079	0.869172	0.130828	0.789214	0.210786
WineEuropean	UFMG_CM_Y617	775500	663247	112253	31504	80750	527383	135864	0.855251	0.144749	0.795153	0.204847
WineEuropean	UFMG_CM_Y619	775500	673443	102057	27801	74257	531086	142357	0.868398	0.131602	0.788613	0.211387
WineEuropean	UFMG_CM_Y618	775500	672729	102771	27716	75056	531171	141558	0.867478	0.132522	0.789576	0.210424
WineEuropean	BQROSW	775500	637096	138404	51626	86779	507261	129835	0.821529	0.178471	0.796208	0.203792
WineEuropean	AINOSW	775500	637053	138447	51714	86734	507173	129880	0.821474	0.178526	0.796124	0.203876
WineEuropean	BQTOSW	775500	638451	137049	51266	85784	507621	130830	0.823277	0.176723	0.795082	0.204918
WineEuropean	BPHOSW	775500	629224	146276	58446	87831	500441	128783	0.811378	0.188622	0.79533	0.20467
WineEuropean	BPGOSW	775500	625201	150299	59928	90372	498959	126242	0.806191	0.193809	0.798078	0.201922
WineEuropean	BISOSW	775500	637345	138155	51595	86561	507292	130053	0.82185	0.17815	0.795946	0.204054
WineEuropean	BIIOSW	775500	638223	137277	51277	86001	507610	130613	0.822983	0.177017	0.795349	0.204651
WineEuropean	BNFOSW	775500	637656	137844	51573	86272	507314	130342	0.822251	0.177749	0.795592	0.204408
WineEuropean	AITOSW	775500	488243	287257	169631	117627	389256	98987	0.629585	0.370415	0.797259	0.202741
WineEuropean	AIROSW	775500	636972	138528	51863	86666	507024	129948	0.821369	0.178631	0.795991	0.204009
WineEuropean	BQHOSW	775500	638129	137371	51393	85979	507494	130635	0.822861	0.177139	0.795284	0.204716
WineEuropean	BNROSW	775500	636918	138582	51742	86841	507145	129773	0.8213	0.1787	0.796248	0.203752
WineEuropean	BNKOSW	775500	637319	138181	51788	86394	507099	130220	0.821817	0.178183	0.795675	0.204325
WineEuropean	SACE_YCA	775500	630225	145275	54786	90490	504101	126124	0.812669	0.187331	0.799875	0.200125
WineEuropean	BSGOSW	775500	638627	136873	51292	85582	507595	131032	0.823504	0.176496	0.794822	0.205178
WineEuropean	AHNOSW	775500	639058	136442	50839	85604	508048	131010	0.824059	0.175941	0.794995	0.205005
WineEuropean	SACE_GAP	775500	605796	169704	68635	101070	490252	115544	0.781168	0.218832	0.809269	0.190731
WineEuropean	BIDOSW	775500	638917	136583	51107	85477	507780	131137	0.823877	0.176123	0.794751	0.205249
WineEuropean	AIIOSW	775500	630056	145444	57944	87501	500943	129113	0.812451	0.187549	0.795077	0.204923
WineEuropean	YB8	775500	631401	144099	54321	89779	504566	126835	0.814186	0.185814	0.799121	0.200879
WineEuropean	YB7	775500	631593	143907	54475	89433	504412	127181	0.814433	0.185567	0.798635	0.201365
WineEuropean	6320_A7	775500	624382	151118	58116	93003	500771	123611	0.805135	0.194865	0.802027	0.197973
WineEuropean	ADBOSW	775500	599835	175665	83578	92088	475309	124526	0.773482	0.226518	0.7924	0.2076
WineEuropean	BEQOSW	775500	637642	137858	51975	85884	506912	130730	0.822233	0.177767	0.794979	0.205021
WineEuropean	20B2	775500	634717	140783	53048	87736	505839	128878	0.818462	0.181538	0.796952	0.203048
WineEuropean	BLIOSW	775500	641152	134348	50011	84338	508876	132276	0.82676	0.17324	0.79369	0.20631
WineEuropean	BLGOSW	775500	639898	135602	50521	85082	508366	131532	0.825142	0.174858	0.794448	0.205552
WineEuropean	EXF6719	775500	621070	154430	59803	94628	499084	121986	0.800864	0.199136	0.803587	0.196413
WineEuropean	CHDOSW	775500	638799	136701	51096	85606	507791	131008	0.823725	0.176275	0.794915	0.205085
WineEuropean	CHBOSW	775500	639296	136204	50777	85428	508110	131186	0.824366	0.175634	0.794796	0.205204
WineEuropean	BSPOSW	775500	640355	135145	50491	84655	508396	131959	0.825732	0.174268	0.793928	0.206072
WineEuropean	ZP641	775500	621954	153546	57294	96253	501593	120361	0.802004	0.197996	0.806479	0.193521
WineEuropean1	BRCOSW	775500	639055	136445	50992	85454	507895	131160	0.824055	0.175945	0.794759	0.205241
WineEuropean1	BFDOSW	775500	639508	135992	50669	85324	508218	131290	0.82464	0.17536	0.794702	0.205298
WineEuropean1	BQAOSW	775500	638857	136643	50996	85648	507891	130966	0.8238	0.1762	0.795	0.205
WineEuropean1	ACPOSW	775500	639544	135956	50439	85518	508448	131096	0.824686	0.175314	0.795016	0.204984
WineEuropean1	WI006	775500	626036	149464	57495	91970	501392	124644	0.807268	0.192732	0.8009	0.1991
WineEuropean1	AMAOSW	775500	638696	136804	50940	85865	507947	130749	0.823593	0.176407	0.795288	0.204712
WineEuropean1	BBIOSW	775500	639300	136200	50784	85417	508103	131197	0.824371	0.175629	0.79478	0.20522
WineEuropean1	ALQOSW	775500	638594	136906	51112	85795	507775	130819	0.823461	0.176539	0.795145	0.204855
WineEuropean1	CCMOSW	775500	641887	133613	49409	84205	509478	132409	0.827707	0.172293	0.793719	0.206281
WineEuropean1	BFBOSW	775500	638409	137091	51154	85938	507733	130676	0.823222	0.176778	0.79531	0.20469
WineEuropean1	BEPOSW	775500	638454	137046	51138	85909	507749	130705	0.82328	0.17672	0.795279	0.204721
WineEuropean1	BBKOSW	775500	639018	136482	50894	85589	507993	131025	0.824008	0.175992	0.794959	0.205041
WineEuropean1	ALTOSW	775500	637756	137744	51378	86367	507509	130247	0.82238	0.17762	0.795773	0.204227
WineEuropean1	CBIOSW	775500	637649	137851	51574	86278	507313	130336	0.822242	0.177758	0.795599	0.204401
WineEuropean1	BQNOSW	775500	637561	137939	51504	86436	507383	130178	0.822129	0.177871	0.795819	0.204181
WineEuropean1	BPQOSW	775500	636396	139104	51840	87265	507047	129349	0.820627	0.179373	0.796748	0.203252
WineEuropean1	BBHOSW	775500	638545	136955	51226	85730	507661	130884	0.823398	0.176602	0.795028	0.204972
WineEuropean1	ALSOSW	775500	637874	137626	51379	86248	507508	130366	0.822533	0.177467	0.795624	0.204376
WineEuropean	SACE_YAA	775500	639290	136210	50842	85369	508045	131245	0.824358	0.175642	0.794702	0.205298
WineEuropean	L1414	775500	635677	139823	52586	87238	506301	129376	0.8197	0.1803	0.796475	0.203525
WineEuropean	BTNOSW	775500	637857	137643	51688	85956	507199	130658	0.822511	0.177489	0.795161	0.204839
WineEuropean	CRHOSW	775500	638474	137026	51384	85643	507503	130971	0.823306	0.176694	0.794869	0.205131
WineEuropean	BTLOSW	775500	637729	137771	51551	86221	507336	130393	0.822346	0.177654	0.795535	0.204465
WineEuropean	CFROSW	775500	638223	137277	51181	86097	507706	130517	0.822983	0.177017	0.795499	0.204501
WineEuropean	BSBOSW	775500	639136	136364	50858	85507	508029	131107	0.82416	0.17584	0.794868	0.205132
WineEuropean	SACE_YCP	775500	641775	133725	49795	83931	509092	132683	0.827563	0.172437	0.793256	0.206744
WineEuropean	ADCOSW	775500	640061	135439	50350	85090	508537	131524	0.825353	0.174647	0.794513	0.205487
WineEuropean	SACE_YCQ	775500	644054	131446	48617	82830	510270	133784	0.830502	0.169498	0.792278	0.207722
WineEuropean	SACE_YCD	775500	630463	145037	57682	87356	501205	129258	0.812976	0.187024	0.794979	0.205021
WineEuropean	CFQOSW	775500	640451	135049	50151	84899	508736	131715	0.825856	0.174144	0.79434	0.20566
WineEuropean	BSAOSW	775500	640398	135102	50477	84626	508410	131988	0.825787	0.174213	0.793897	0.206103
WineEuropean	BSCOSW	775500	638543	136957	51205	85753	507682	130861	0.823395	0.176605	0.795063	0.204937
WineEuropean	ADROSW	775500	639690	135810	50483	85328	508404	131286	0.824874	0.175126	0.794766	0.205234
WineEuropean	BSEOSW	775500	639067	136433	50987	85447	507900	131167	0.824071	0.175929	0.794752	0.205248
WineEuropean	CGTOSW	775500	638858	136642	51019	85624	507868	130990	0.823801	0.176199	0.794962	0.205038
WineEuropean	CGSOSW	775500	638524	136976	51065	85912	507822	130702	0.823371	0.176629	0.795306	0.204694
WineEuropean	CFSOSW	775500	638213	137287	51402	85886	507485	130728	0.82297	0.17703	0.795166	0.204834
WineEuropean	AAAOSW	775500	639228	136272	50650	85623	508237	130991	0.824279	0.175721	0.795079	0.204921
WineEuropean	SD085	775500	620946	154554	59700	94855	499187	121759	0.800704	0.199296	0.803914	0.196086
WineEuropean	WI017	775500	633438	142062	53873	88190	505014	128424	0.816812	0.183188	0.797259	0.202741
WineEuropean	WL013	775500	600336	175164	74836	100329	484051	116285	0.774128	0.225872	0.8063	0.1937
WineEuropean	L564	775500	606635	168865	67626	101240	491261	115374	0.78225	0.21775	0.809813	0.190187
WineEuropean	L181	775500	618142	157358	61095	96264	497792	120350	0.797088	0.202912	0.805304	0.194696
WineEuropean	BSTOSW	775500	638126	137374	51348	86027	507539	130587	0.822858	0.177142	0.795359	0.204641
WineEuropean	BEVOSW	775500	637059	138441	51797	86645	507090	129969	0.821482	0.178518	0.795986	0.204014
WineEuropean	BETOSW	775500	638374	137126	51079	86048	507808	130566	0.823177	0.176823	0.795471	0.204529
WineEuropean	ASSOSW	775500	629816	145684	57340	88345	501547	128269	0.812142	0.187858	0.796339	0.203661
WineEuropean	BSDOSW	775500	638968	136532	50989	85544	507898	131070	0.823943	0.176057	0.794872	0.205128
WineEuropean	ATMOSW	775500	629553	145947	57091	88857	501796	127757	0.811803	0.188197	0.797067	0.202933
WineEuropean	NX2	775500	620269	155231	62826	92406	496061	124208	0.799831	0.200169	0.799751	0.200249
WineEuropean	WI003	775500	625638	149862	57695	92168	501192	124446	0.806754	0.193246	0.801089	0.198911
WineEuropean	NX3	775500	650011	125489	42824	82666	516063	133948	0.838183	0.161817	0.79393	0.20607
WineEuropean	NX1	775500	631369	144131	54808	89324	504079	127290	0.814144	0.185856	0.79839	0.20161
WineEuropean	CQTOSW	775500	639542	135958	50790	85169	508097	131445	0.824683	0.175317	0.79447	0.20553
WineEuropean	WI011	775500	629441	146059	55631	90429	503256	126185	0.811658	0.188342	0.799528	0.200472
WineEuropean	22A4	775500	633611	141889	53654	88236	505233	128378	0.817035	0.182965	0.797387	0.202613
WineEuropean	BBAOSW	775500	638915	136585	50948	85638	507939	130976	0.823875	0.176125	0.795002	0.204998
WineEuropean	Sgu421	775500	647338	128162	42848	85315	516039	131299	0.834736	0.165264	0.797171	0.202829
WineEuropean2	SACE_YAY	775500	614843	160657	63064	97594	495823	119020	0.792834	0.207166	0.806422	0.193578
WineEuropean2	SACE_YBF	775500	623836	151664	58067	93598	500820	123016	0.804431	0.195569	0.802807	0.197193
WineEuropean2	BMKOSW	775500	640389	135111	50364	84748	508523	131866	0.825776	0.174224	0.794085	0.205915
WineEuropean2	SACE_YBH	775500	630133	145367	55488	89880	503399	126734	0.812551	0.187449	0.798877	0.201123
WineEuropean2	SACE_YBA	775500	619714	155786	60162	95625	498725	120989	0.799115	0.200885	0.804766	0.195234
WineEuropean2	ADIOSW	775500	639725	135775	50391	85385	508496	131229	0.824919	0.175081	0.794867	0.205133
WineEuropean2	BMHOSW	775500	637254	138246	51823	86424	507064	130190	0.821733	0.178267	0.795702	0.204298
WineEuropean2	SACE_YBE	775500	632558	142942	54019	88924	504868	127690	0.815678	0.184322	0.798137	0.201863
WineEuropean2	BMIOSW	775500	637841	137659	51564	86096	507323	130518	0.82249	0.17751	0.795375	0.204625
WineEuropean2	BE020	775500	628110	147390	56367	91024	502520	125590	0.809942	0.190058	0.800051	0.199949
WineEuropean2	SACE_YAZ	775500	627137	148363	56457	91907	502430	124707	0.808687	0.191313	0.801149	0.198851
WineEuropean2	SACE_YBG	775500	633034	142466	53571	88896	505316	127718	0.816291	0.183709	0.798245	0.201755
WineEuropean2	SACE_YBB	775500	626249	149251	56893	92359	501994	124255	0.807542	0.192458	0.801589	0.198411
WineEuropean2	ADDOSW	775500	639339	136161	50592	85570	508295	131044	0.824422	0.175578	0.795032	0.204968
WineEuropean	BRDOSW	775500	639858	135642	50563	85080	508324	131534	0.825091	0.174909	0.794433	0.205567
WineEuropean	L723	775500	618601	156899	60963	95937	497924	120677	0.79768	0.20232	0.804919	0.195081
WineEuropean	BASOSW	775500	638431	137069	51153	85917	507734	130697	0.823251	0.176749	0.795284	0.204716
WineEuropean	BATOSW	775500	638749	136751	51066	85686	507821	130928	0.823661	0.176339	0.795024	0.204976
WineEuropean	BAROSW	775500	638643	136857	51143	85715	507744	130899	0.823524	0.176476	0.795036	0.204964
WineEuropean	BQIOSW	775500	636994	138506	51861	86646	507026	129968	0.821398	0.178602	0.795967	0.204033
WineEuropean	AGVOSW	775500	639453	136047	50690	85358	508197	131256	0.824569	0.175431	0.794737	0.205263
WineEuropean	BLHOSW	775500	638757	136743	51242	85502	507645	131112	0.823671	0.176329	0.794739	0.205261
WineEuropean	BKEOSW	775500	637473	138027	51501	86527	507386	130087	0.822015	0.177985	0.795933	0.204067
WineEuropean	BPCOSW	775500	638494	137006	51059	85948	507828	130666	0.823332	0.176668	0.795353	0.204647
WineEuropean	AGSOSW	775500	639933	135567	50482	85086	508405	131528	0.825188	0.174812	0.794466	0.205534
WineEuropean	AGAOSW	775500	580003	195497	96839	98659	462048	117955	0.747908	0.252092	0.79663	0.20337
WineEuropean	WI004	775500	627057	148443	56804	91640	502083	124974	0.808584	0.191416	0.800698	0.199302
WineEuropean	SP011	775500	576271	199229	94961	104269	463926	112345	0.743096	0.256904	0.805048	0.194952
WineEuropean	AMSOSW	775500	638303	137197	51235	85963	507652	130651	0.823086	0.176914	0.795315	0.204685
WineEuropean	AILOSW	775500	637659	137841	51350	86492	507537	130122	0.822255	0.177745	0.795938	0.204062
WineEuropean	CRGOSW	775500	637941	137559	51637	85923	507250	130691	0.822619	0.177381	0.795136	0.204864
WineEuropean	REG1B_25A	775500	629842	145658	55553	90106	503334	126508	0.812175	0.187825	0.799143	0.200857
WineEuropean	BLEOSW	775500	640509	134991	50383	84609	508504	132005	0.82593	0.17407	0.793906	0.206094
WineEuropean	L175	775500	614739	160761	62981	97781	495906	118833	0.7927	0.2073	0.806694	0.193306
WineEuropean	CRCOSW	775500	637483	138017	51782	86236	507105	130378	0.822028	0.177972	0.79548	0.20452
WineEuropean	BPVOSW	775500	638988	136512	51012	85501	507875	131113	0.823969	0.176031	0.794811	0.205189
WineEuropean	BREOSW	775500	639560	135940	50785	85156	508102	131458	0.824707	0.175293	0.794456	0.205544
WineEuropean	BQCOSW	775500	639057	136443	50941	85503	507946	131111	0.824058	0.175942	0.794837	0.205163
WineEuropean	BLMOSW	775500	640093	135407	50576	84832	508311	131782	0.825394	0.174606	0.794121	0.205879
WineEuropean	WI005	775500	628599	146901	56264	90638	502623	125976	0.810573	0.189427	0.799592	0.200408
WineEuropean	BHNOSW	775500	638000	137500	51231	86270	507656	130344	0.822695	0.177305	0.795699	0.204301
WineEuropean	GE7_4A	775500	639300	136200	50834	85367	508053	131247	0.824371	0.175629	0.794702	0.205298
WineEuropean	CRLOSW	775500	653423	122077	39514	82564	519373	134050	0.842583	0.157417	0.79485	0.20515
WineEuropean	CAFOSW	775500	637738	137762	51591	86172	507296	130442	0.822357	0.177643	0.795461	0.204539
WineEuropean	CAEOSW	775500	640996	134504	50205	84300	508682	132314	0.826558	0.173442	0.793581	0.206419
WineEuropean	BBBOSW	775500	636330	139170	52191	86980	506696	129634	0.820542	0.179458	0.796279	0.203721
WineEuropean	BAVOSW	775500	638823	136677	51095	85583	507792	131031	0.823756	0.176244	0.794887	0.205113
WineEuropean	BQBOSW	775500	636606	138894	51905	86990	506982	129624	0.820897	0.179103	0.796383	0.203617
WineEuropean	BICOSW	775500	639825	135675	50639	85037	508248	131577	0.825048	0.174952	0.794355	0.205645
WineEuropean	CPEOSW	775500	629397	146103	58227	87877	500660	128737	0.811602	0.188398	0.79546	0.20454
WineEuropean	D47_60_3B	775500	629583	145917	55361	90557	503526	126057	0.811841	0.188159	0.799777	0.200223
WineEuropean	Sgu165	775500	656715	118785	38661	80125	520226	136489	0.846828	0.153172	0.792164	0.207836
WineEuropean	SG60	775500	649500	126000	41494	84507	517393	132107	0.837524	0.162476	0.796602	0.203398
WineEuropean	SGU165_50A	775500	618321	157179	61434	95746	497453	120868	0.797319	0.202681	0.804522	0.195478
WineEuropean	BSMOSW	775500	638925	136575	51030	85546	507857	131068	0.823888	0.176112	0.794862	0.205138
WineEuropean	BSNOSW	775500	639120	136380	50835	85546	508052	131068	0.824139	0.175861	0.794924	0.205076
WineEuropean	BRFOSW	775500	638369	137131	51177	85955	507710	130659	0.823171	0.176829	0.795324	0.204676
WineEuropean	BE088	775500	618746	156754	60837	95918	498050	120696	0.797867	0.202133	0.804934	0.195066
WineEuropean	WI009	775500	628189	147311	56266	91046	502621	125568	0.810044	0.189956	0.800111	0.199889
WineEuropean	BE024	775500	628220	147280	56149	91132	502738	125482	0.810084	0.189916	0.800258	0.199742
WineEuropean	BVKOSW	775500	638379	137121	51379	85743	507508	130871	0.823184	0.176816	0.794995	0.205005
WineEuropean	BBVOSW	775500	624812	150688	62441	88248	496446	128366	0.805689	0.194311	0.794553	0.205447
WineEuropean	K1_280_2B	775500	634397	141103	53267	87837	505620	128777	0.818049	0.181951	0.797009	0.202991
WineEuropean	CFEOSW	775500	640129	135371	50451	84921	508436	131693	0.82544	0.17456	0.794271	0.205729
WineEuropean	WI013	775500	636008	139492	52145	87348	506742	129266	0.820126	0.179874	0.796754	0.203246
WineEuropean	WI001	775500	627958	147542	56437	91106	502450	125508	0.809746	0.190254	0.800133	0.199867
WineEuropean	SP002	775500	628611	146889	56196	90694	502691	125920	0.810588	0.189412	0.799685	0.200315
WineEuropean	BE033	775500	628862	146638	56056	90583	502831	126031	0.810912	0.189088	0.799589	0.200411
WineEuropean	BPPOSW	775500	629839	145661	58061	87601	500826	129013	0.812172	0.187828	0.795165	0.204835
WineEuropean	BLBOSW	775500	638304	137196	51036	86161	507851	130453	0.823087	0.176913	0.795626	0.204374
WineEuropean	SACE_YBO	775500	625755	149745	56920	92826	501967	123788	0.806905	0.193095	0.802178	0.197822
WineEuropean	ATNOSW	775500	637808	137692	51591	86102	507296	130512	0.822447	0.177553	0.795374	0.204626
WineEuropean	AHTOSW	775500	640065	135435	50212	85224	508675	131390	0.825358	0.174642	0.794724	0.205276
WineEuropean	BNNOSW	775500	639344	136156	50851	85306	508036	131308	0.824428	0.175572	0.794621	0.205379
WineEuropean	CEDOSW	775500	610144	165356	74116	91241	484771	125373	0.786775	0.213225	0.794519	0.205481
WineEuropean	CEFOSW	775500	639001	136499	51057	85443	507830	131171	0.823986	0.176014	0.794725	0.205275
WineEuropean	CDVOSW	775500	639263	136237	50984	85254	507903	131360	0.824324	0.175676	0.794513	0.205487
WineEuropean	BKSOSW	775500	638202	137298	51289	86010	507598	130604	0.822956	0.177044	0.795356	0.204644
WineEuropean	BLPOSW	775500	639999	135501	50571	84931	508316	131683	0.825273	0.174727	0.794245	0.205755
WineEuropean	BLNOSW	775500	638739	136761	51071	85691	507816	130923	0.823648	0.176352	0.795029	0.204971
WineEuropean	ADSOSW	775500	637918	137582	51387	86196	507500	130418	0.822589	0.177411	0.795557	0.204443
WineEuropean	BLFOSW	775500	639111	136389	51020	85370	507867	131244	0.824128	0.175872	0.794646	0.205354
WineEuropean	CEBOSW	775500	640271	135229	50261	84969	508626	131645	0.825623	0.174377	0.794392	0.205608
WineEuropean	CEAOSW	775500	641194	134306	49942	84365	508945	132249	0.826814	0.173186	0.793746	0.206254
WineEuropean	BLDOSW	775500	639109	136391	50985	85407	507902	131207	0.824125	0.175875	0.794703	0.205297
WineEuropean	CECOSW	775500	639613	135887	50683	85205	508204	131409	0.824775	0.175225	0.794549	0.205451
WineEuropean	BKROSW	775500	638846	136654	50995	85660	507892	130954	0.823786	0.176214	0.795015	0.204985
WineEuropean	BNHOSW	775500	636877	138623	51809	86815	507078	129799	0.821247	0.178753	0.796195	0.203805
WineEuropean	CEEOSW	775500	639001	136499	50988	85512	507899	131102	0.823986	0.176014	0.794833	0.205167
WineEuropean	BLCOSW	775500	639773	135727	50562	85166	508325	131448	0.824981	0.175019	0.79454	0.20546
WineEuropean	BIGOSW	775500	639654	135846	50708	85139	508179	131475	0.824828	0.175172	0.794459	0.205541
WineEuropean	BNIOSW	775500	638663	136837	51132	85706	507755	130908	0.82355	0.17645	0.795028	0.204972
WineEuropean	BQGOSW	775500	639195	136305	50923	85383	507964	131231	0.824236	0.175764	0.794693	0.205307
WineEuropean	BLVOSW	775500	638518	136982	51176	85807	507711	130807	0.823363	0.176637	0.79514	0.20486
WineEuropean	BKAOSW	775500	637911	137589	51408	86182	507479	130432	0.82258	0.17742	0.795533	0.204467
WineEuropean	BINOSW	775500	637424	138076	51570	86507	507317	130107	0.821952	0.178048	0.795886	0.204114
WineEuropean	BIMOSW	775500	638492	137008	51142	85867	507745	130747	0.823329	0.176671	0.795225	0.204775
WineEuropean	CRIOSW	775500	537721	237779	132963	104817	425924	111797	0.693386	0.306614	0.792091	0.207909
WineEuropean	CRDOSW	775500	637509	137991	51720	86272	507167	130342	0.822062	0.177938	0.795545	0.204455
WineEuropean	BVMOSW	775500	638714	136786	51121	85666	507766	130948	0.823616	0.176384	0.794982	0.205018
WineEuropean	CRKOSW	775500	638226	137274	51458	85817	507429	130797	0.822986	0.177014	0.795062	0.204938
WineEuropean	CQVOSW	775500	637554	137946	51557	86390	507330	130224	0.82212	0.17788	0.795744	0.204256
WineEuropean	CLHOSW	775500	494296	281204	167251	113954	391636	102660	0.63739	0.36261	0.792311	0.207689
WineEuropean	BIKOSW	775500	636474	139026	51948	87079	506939	129535	0.820727	0.179273	0.79648	0.20352
WineEuropean	AVKOSW	775500	638188	137312	51438	85875	507449	130739	0.822937	0.177063	0.79514	0.20486
WineEuropean	ANQOSW	775500	637522	137978	51434	86545	507453	130069	0.822079	0.177921	0.795977	0.204023
WineEuropean	BILOSW	775500	636059	139441	52034	87408	506853	129206	0.820192	0.179808	0.796865	0.203135
WineEuropean	ABSOSW	775500	640734	134766	50073	84694	508814	131920	0.826221	0.173779	0.794111	0.205889
WineEuropean	BIQOSW	775500	625335	150165	62040	88126	496847	128488	0.806364	0.193636	0.794529	0.205471
WineEuropean	BIPOSW	775500	609291	166209	74417	91793	484470	124821	0.785675	0.214325	0.795137	0.204863
WineEuropean	BQQOSW	775500	636338	139162	52224	86939	506663	129675	0.820552	0.179448	0.796217	0.203783
WineEuropean	BKQOSW	775500	638212	137288	51213	86076	507674	130538	0.822968	0.177032	0.795463	0.204537
WineEuropean	CBHOSW	775500	656839	118661	38255	80407	520632	136207	0.846988	0.153012	0.792633	0.207367
WineEuropean	CRBOSW	775500	615683	159817	68014	91804	490873	124810	0.793917	0.206083	0.797282	0.202718
WineEuropean	BPMOSW	775500	638876	136624	50960	85665	507927	130949	0.823825	0.176175	0.795032	0.204968
WineEuropean	BKHOSW	775500	638751	136749	50963	85787	507924	130827	0.823663	0.176337	0.795183	0.204817
WineEuropean	CRAOSW	775500	628478	147022	58913	88110	499974	128504	0.810417	0.189583	0.795531	0.204469
WineEuropean	BKPOSW	775500	607075	168425	75521	92905	483366	123709	0.782818	0.217182	0.796221	0.203779
WineEuropean	BNMOSW	775500	637459	138041	51728	86314	507159	130300	0.821997	0.178003	0.795595	0.204405
WineEuropean	BNQOSW	775500	638188	137312	51235	86078	507652	130536	0.822937	0.177063	0.795458	0.204542
WineEuropean	BKNOSW	775500	637716	137784	51449	86336	507438	130278	0.822329	0.177671	0.795712	0.204288
WineEuropean	BNPOSW	775500	636569	138931	51805	87127	507082	129487	0.82085	0.17915	0.796586	0.203414
WineEuropean	BKDOSW	775500	640296	135204	50254	84951	508633	131663	0.825656	0.174344	0.794372	0.205628
WineEuropean	ACROSW	775500	640548	134952	50089	84864	508798	131750	0.825981	0.174019	0.794317	0.205683
WineEuropean	BLSOSW	775500	641406	134094	49956	84139	508931	132475	0.827087	0.172913	0.793462	0.206538
WineEuropean	BKCOSW	775500	639393	136107	50674	85434	508213	131180	0.824491	0.175509	0.794837	0.205163
WineEuropean	BIHOSW	775500	639527	135973	50694	85280	508193	131334	0.824664	0.175336	0.794639	0.205361
WineEuropean	CHCOSW	775500	640795	134705	50079	84627	508808	131987	0.826299	0.173701	0.794026	0.205974
WineEuropean	CHEOSW	775500	638204	137296	51388	85909	507499	130705	0.822958	0.177042	0.795199	0.204801
WineEuropean	CGVOSW	775500	636991	138509	51881	86629	507006	129985	0.821394	0.178606	0.795939	0.204061
WineEuropean	BIFOSW	775500	638505	136995	51172	85824	507715	130790	0.823346	0.176654	0.795162	0.204838
WineEuropean	BKGOSW	775500	638845	136655	51011	85645	507876	130969	0.823785	0.176215	0.794991	0.205009
WineEuropean	BLLOSW	775500	639481	136019	50932	85088	507955	131526	0.824605	0.175395	0.794324	0.205676
WineEuropean	BKFOSW	775500	637694	137806	51649	86158	507238	130456	0.8223	0.1777	0.795425	0.204575
WineEuropean	BKMOSW	775500	638749	136751	51001	85751	507886	130863	0.823661	0.176339	0.795126	0.204874
WineEuropean	AHIOSW	775500	596521	178979	85361	93619	473526	122995	0.769208	0.230792	0.793813	0.206187
WineEuropean	ARLOSW	775500	615041	160459	69507	90953	489380	125661	0.79309	0.20691	0.795687	0.204313
WineEuropean	YE2	775500	634204	141296	53244	88053	505643	128561	0.8178	0.1822	0.797288	0.202712
WineEuropean	YE3	775500	633455	142045	53519	88527	505368	128087	0.816834	0.183166	0.797796	0.202204
WineEuropean	YB10	775500	632652	142848	53946	88903	504941	127711	0.815799	0.184201	0.798134	0.201866
WineEuropean3	CIPOSW	775500	519733	255767	144379	111389	414508	105225	0.670191	0.329809	0.79754	0.20246
WineEuropean3	CIMOSW	775500	613936	161564	69861	91704	489026	124910	0.791665	0.208335	0.796542	0.203458
WineEuropean3	BCAOSW	775500	636409	139091	51912	87180	506975	129434	0.820643	0.179357	0.796618	0.203382
WineEuropean3	AMTOSW	775500	639018	136482	50752	85731	508135	130883	0.824008	0.175992	0.795181	0.204819
WineEuropean3	CKIOSW	775500	637310	138190	51560	86631	507327	129983	0.821805	0.178195	0.796044	0.203956
WineEuropean3	CIVOSW	775500	638606	136894	50951	85944	507936	130670	0.823476	0.176524	0.795382	0.204618
WineEuropean3	CKLOSW	775500	638333	137167	51106	86062	507781	130552	0.823124	0.176876	0.79548	0.20452
WineEuropean3	CKDOSW	775500	636738	138762	51821	86942	507066	129672	0.821068	0.178932	0.79635	0.20365
WineEuropean3	CKHOSW	775500	636978	138522	51685	86838	507202	129776	0.821377	0.178623	0.796263	0.203737
WineEuropean3	CKPOSW	775500	637977	137523	51264	86260	507623	130354	0.822665	0.177335	0.795676	0.204324
WineEuropean3	CKGOSW	775500	637999	137501	51192	86310	507695	130304	0.822694	0.177306	0.795761	0.204239
WineEuropean3	CKTOSW	775500	640086	135414	50188	85227	508699	131387	0.825385	0.174615	0.794735	0.205265
WineEuropean3	CITOSW	775500	637442	138058	51570	86489	507317	130125	0.821975	0.178025	0.795864	0.204136
WineEuropean3	CIROSW	775500	637144	138356	51578	86779	507309	129835	0.821591	0.178409	0.796223	0.203777
WineEuropean3	CKQOSW	775500	637791	137709	51242	86468	507645	130146	0.822426	0.177574	0.795943	0.204057
WineEuropean3	CIQOSW	775500	622416	153084	63465	89620	495422	126994	0.8026	0.1974	0.795966	0.204034
WineEuropean3	CKEOSW	775500	638350	137150	50938	86213	507949	130401	0.823146	0.176854	0.795722	0.204278
WineEuropean3	BMNOSW	775500	639151	136349	50929	85421	507958	131193	0.824179	0.175821	0.794739	0.205261
WineEuropean3	CKMOSW	775500	637703	137797	51534	86264	507353	130350	0.822312	0.177688	0.795595	0.204405
WineEuropean3	CKCOSW	775500	636608	138892	51899	86994	506988	129620	0.8209	0.1791	0.79639	0.20361
WineEuropean3	CKBOSW	775500	636580	138920	51801	87120	507086	129494	0.820864	0.179136	0.796579	0.203421
WineEuropean3	CKFOSW	775500	636256	139244	52044	87201	506843	129413	0.820446	0.179554	0.796602	0.203398
WineEuropean3	CISOSW	775500	638252	137248	50974	86275	507913	130339	0.82302	0.17698	0.795788	0.204212
WineEuropean3	CINOSW	775500	636792	138708	51732	86977	507155	129637	0.821137	0.178863	0.796422	0.203578
WineEuropean	AIQOSW	775500	637810	137690	51323	86368	507564	130246	0.82245	0.17755	0.795792	0.204208
WineEuropean	AIKOSW	775500	639286	136214	50714	85501	508173	131113	0.824353	0.175647	0.794907	0.205093
WineEuropean	L292	775500	620899	154601	59631	94971	499256	121643	0.800643	0.199357	0.804086	0.195914
WineEuropean	CBAOSW	775500	638810	136690	50993	85698	507894	130916	0.82374	0.17626	0.795063	0.204937
WineEuropean	CAHOSW	775500	566098	209402	108617	100786	450270	115828	0.729978	0.270022	0.795392	0.204608
WineEuropean	SACE_YBX	775500	640707	134793	50149	84645	508738	131969	0.826186	0.173814	0.794026	0.205974
WineEuropean	L725	775500	622906	152594	58647	93948	500240	122666	0.803231	0.196769	0.803075	0.196925
WineEuropean	BSLOSW	775500	638814	136686	51085	85602	507802	131012	0.823745	0.176255	0.794914	0.205086
WineEuropean	CAIOSW	775500	639254	136246	50838	85409	508049	131205	0.824312	0.175688	0.794753	0.205247
WineEuropean	CALOSW	775500	639307	136193	50824	85370	508063	131244	0.82438	0.17562	0.794709	0.205291
WineEuropean	CAKOSW	775500	614647	160853	70310	90544	488577	126070	0.792582	0.207418	0.79489	0.20511
WineEuropean	BRBOSW	775500	638706	136794	51147	85648	507740	130966	0.823605	0.176395	0.794951	0.205049
WineEuropean	BQPOSW	775500	638417	137083	51200	85884	507687	130730	0.823233	0.176767	0.795228	0.204772
WineEuropean	UFMG_CM_Y621	775500	659778	115722	33147	82576	525740	134038	0.850778	0.149222	0.796844	0.203156
WineEuropean	UFMG_CM_Y620	775500	654944	120556	37601	82956	521286	133658	0.844544	0.155456	0.795925	0.204075
WineEuropean	ACVOSW	775500	631391	144109	57199	86911	501688	129703	0.814173	0.185827	0.794576	0.205424
WineEuropean	ACTOSW	775500	639763	135737	50303	85435	508584	131179	0.824968	0.175032	0.794957	0.205043
WineEuropean	AKPOSW	775500	637452	138048	51500	86549	507387	130065	0.821988	0.178012	0.795961	0.204039
WineEuropean	ALEOSW	775500	639170	136330	50766	85565	508121	131049	0.824204	0.175796	0.79497	0.20503
WineEuropean	AKVOSW	775500	626905	148595	60881	87715	498006	128899	0.808388	0.191612	0.794388	0.205612
WineEuropean	BRAOSW	775500	639636	135864	50572	85293	508315	131321	0.824805	0.175195	0.794694	0.205306
WineEuropean	AMROSW	775500	637956	137544	51402	86143	507485	130471	0.822638	0.177362	0.795486	0.204514
WineEuropean	ABTOSW	775500	638351	137149	51132	86018	507755	130596	0.823148	0.176852	0.795417	0.204583
WineEuropean	CHAOSW	775500	639265	136235	50730	85506	508157	131108	0.824326	0.175674	0.794908	0.205092
WineEuropean	BLKOSW	775500	639135	136365	50877	85489	508010	131125	0.824159	0.175841	0.79484	0.20516
WineEuropean	BNTOSW	775500	638104	137396	51356	86041	507531	130573	0.822829	0.177171	0.795373	0.204627
WineEuropean	BRHOSW	775500	639915	135585	50691	84895	508196	131719	0.825164	0.174836	0.794162	0.205838
WineEuropean	AQBOSW	775500	637214	138286	51536	86751	507351	129863	0.821681	0.178319	0.796202	0.203798
WineEuropean	ABPOSW	775500	639229	136271	50784	85488	508103	131126	0.82428	0.17572	0.794869	0.205131
WineEuropean	CPFOSW	775500	403656	371844	239538	132307	319349	84307	0.520511	0.479489	0.791141	0.208859
WineEuropean	BIROSW	775500	639811	135689	50597	85093	508290	131521	0.82503	0.17497	0.794438	0.205562
WineEuropean	BITOSW	775500	638880	136620	51018	85603	507869	131011	0.82383	0.17617	0.794936	0.205064
WineEuropean	BE030	775500	636332	139168	52079	87090	506808	129524	0.820544	0.179456	0.796452	0.203548
WineEuropean	BE014	775500	636777	138723	51865	86859	507022	129755	0.821118	0.178882	0.796232	0.203768
WineEuropean	BNGOSW	775500	639114	136386	51123	85264	507764	131350	0.824132	0.175868	0.794481	0.205519
WineEuropean	CFBOSW	775500	615862	159638	69326	90313	489561	126301	0.794148	0.205852	0.79492	0.20508
WineEuropean	AIMOSW	775500	637772	137728	51509	86220	507378	130394	0.822401	0.177599	0.795548	0.204452
WineEuropean	CHFOSW	775500	638620	136880	51141	85740	507746	130874	0.823495	0.176505	0.795067	0.204933
WineEuropean	BHBOSW	775500	638099	137401	51284	86118	507603	130496	0.822823	0.177177	0.795493	0.204507
WineEuropean	TUM511	775500	675617	99883	26451	73433	532436	143181	0.871202	0.128798	0.788074	0.211926
WineEuropean	Fermicru4F9	775500	660728	114772	33807	80966	525080	135648	0.852003	0.147997	0.794699	0.205301
WineEuropean	WI007	775500	630130	145370	55395	89976	503492	126638	0.812547	0.187453	0.799029	0.200971
WineEuropean	CI001	775500	600782	174718	74641	100078	484246	116536	0.774703	0.225297	0.806026	0.193974
WineEuropean	WI018	775500	628931	146569	55723	90847	503164	125767	0.811001	0.188999	0.800031	0.199969
WineEuropean	WI010	775500	617856	157644	65487	92158	493400	124456	0.79672	0.20328	0.798568	0.201432
WineEuropean	BSSOSW	775500	637977	137523	51302	86222	507585	130392	0.822665	0.177335	0.795616	0.204384
WineEuropean	BSROSW	775500	636631	138869	52161	86709	506726	129905	0.82093	0.17907	0.795949	0.204051
WineEuropean	BTROSW	775500	636625	138875	52139	86737	506748	129877	0.820922	0.179078	0.795991	0.204009
WineEuropean	ASROSW	775500	617719	157781	66708	91074	492179	125540	0.796543	0.203457	0.796768	0.203232
WineEuropean	BTPOSW	775500	639007	136493	50929	85565	507958	131049	0.823994	0.176006	0.794918	0.205082
WineEuropean	SACE_YDJ	775500	618603	156897	67546	89352	491341	127262	0.797683	0.202317	0.794275	0.205725
WineEuropean	59A	775500	638347	137153	51329	85825	507558	130789	0.823142	0.176858	0.795113	0.204887
WineEuropean4	WL012	775500	601604	173896	73927	99970	484960	116644	0.775763	0.224237	0.806112	0.193888
WineEuropean4	AHPOSW	775500	637227	138273	51802	86472	507085	130142	0.821698	0.178302	0.795768	0.204232
WineEuropean4	AAKOSW	775500	639862	135638	50424	85215	508463	131399	0.825096	0.174904	0.794645	0.205355
WineEuropean4	FS2D	775500	642825	132675	49220	83456	509667	133158	0.828917	0.171083	0.792855	0.207145
WineEuropean4	AETOSW	775500	637847	137653	51484	86170	507403	130444	0.822498	0.177502	0.795493	0.204507
WineEuropean4	AQPOSW	775500	599652	175848	81112	94737	477775	121877	0.773246	0.226754	0.796754	0.203246
WineEuropean4	F25	775500	638725	136775	51113	85663	507774	130951	0.82363	0.17637	0.794981	0.205019
WineEuropean4	ASAOSW	775500	634796	140704	53144	87561	505743	129053	0.818564	0.181436	0.796702	0.203298
WineEuropean4	7_7	775500	636314	139186	52367	86820	506520	129794	0.820521	0.179479	0.796022	0.203978
WineEuropean4	AQEOSW	775500	636495	139005	52365	86641	506522	129973	0.820754	0.179246	0.795799	0.204201
WineEuropean4	AEKOSW	775500	640675	134825	50174	84652	508713	131962	0.826144	0.173856	0.794027	0.205973
WineEuropean4	WI014	775500	621819	153681	61714	91968	497173	124646	0.80183	0.19817	0.799546	0.200454
WineEuropean4	AHKOSW	775500	638549	136951	51198	85754	507689	130860	0.823403	0.176597	0.795067	0.204933
WineEuropean4	BPLOSW	775500	637891	137609	51581	86029	507306	130585	0.822554	0.177446	0.795286	0.204714
WineEuropean4	CAPOSW	775500	638073	137427	51510	85918	507377	130696	0.822789	0.177211	0.795171	0.204829
WineEuropean4	CABOSW	775500	638697	136803	51207	85597	507680	131017	0.823594	0.176406	0.794868	0.205132
WineEuropean4	CANOSW	775500	614018	161482	70275	91208	488612	125406	0.79177	0.20823	0.795762	0.204238
WineEuropean4	AIPOSW	775500	615882	159618	69287	90332	489600	126282	0.794174	0.205826	0.794957	0.205043
WineEuropean4	BPROSW	775500	638898	136602	51176	85427	507711	131187	0.823853	0.176147	0.794667	0.205333
WineEuropean4	TS12_A7	775500	635296	140204	52798	87407	506089	129207	0.819208	0.180792	0.796619	0.203381
WineEuropean4	AFIOSW	775500	632514	142986	56922	86065	501965	130549	0.815621	0.184379	0.793603	0.206397
WineEuropean4	AESOSW	775500	592313	183187	87237	95951	471650	120663	0.763782	0.236218	0.796285	0.203715
WineEuropean4	CBEOSW	775500	636460	139040	52198	86843	506689	129771	0.820709	0.179291	0.796105	0.203895
WineEuropean4	CBBOSW	775500	637259	138241	51719	86523	507168	130091	0.82174	0.17826	0.795859	0.204141
WineEuropean4	CAQOSW	775500	637510	137990	51768	86223	507119	130391	0.822063	0.177937	0.795468	0.204532
WineEuropean4	CAMOSW	775500	635986	139514	52522	86993	506365	129621	0.820098	0.179902	0.796189	0.203811
WineEuropean4	CAAOSW	775500	638227	137273	51396	85878	507491	130736	0.822988	0.177012	0.795158	0.204842
WineEuropean4	BVTOSW	775500	628057	147443	58841	88603	500046	128011	0.809874	0.190126	0.796179	0.203821
WineEuropean4	CADOSW	775500	630268	145232	57891	87342	500996	129272	0.812725	0.187275	0.794894	0.205106
WineEuropean4	CACOSW	775500	628876	146624	58518	88107	500369	128507	0.81093	0.18907	0.795656	0.204344
WineEuropean4	BVVOSW	775500	629033	146467	58487	87981	500400	128633	0.811132	0.188868	0.795507	0.204493
WineEuropean4	AQCOSW	775500	635019	140481	53097	87385	505790	129229	0.818851	0.181149	0.796496	0.203504
WineEuropean4	CBCOSW	775500	635559	139941	52579	87363	506308	129251	0.819547	0.180453	0.796634	0.203366
WineEuropean4	CBDOSW	775500	636035	139465	52396	87070	506491	129544	0.820161	0.179839	0.796326	0.203674
WineEuropean4	CAVOSW	775500	621609	153891	64066	89826	494821	126788	0.801559	0.198441	0.796033	0.203967
WineEuropean4	CASOSW	775500	653360	122140	39676	82465	519211	134149	0.842502	0.157498	0.794678	0.205322
WineEuropean4	CATOSW	775500	636809	138691	51870	86822	507017	129792	0.821159	0.178841	0.796184	0.203816
WineEuropean4	CAROSW	775500	636497	139003	52095	86909	506792	129705	0.820757	0.179243	0.796221	0.203779
WineEuropean4	TA12_2	775500	632163	143337	54514	88824	504373	127790	0.815168	0.184832	0.797853	0.202147
WineEuropean4	P3_D5	775500	627228	148272	56793	91480	502094	125134	0.808805	0.191195	0.800497	0.199503
WineEuropean4	GUF54_A1	775500	633356	142144	53859	88286	505028	128328	0.816707	0.183293	0.797384	0.202616
WineEuropean4	AIBOSW	775500	637116	138384	51649	86736	507238	129878	0.821555	0.178445	0.796147	0.203853
WineEuropean4	AAEOSW	775500	639233	136267	50834	85434	508053	131180	0.824285	0.175715	0.794785	0.205215
WineEuropean4	AIAOSW	775500	637234	138266	51605	86662	507282	129952	0.821707	0.178293	0.796069	0.203931
WineEuropean4	SACE_YAF	775500	629111	146389	55467	90923	503420	125691	0.811233	0.188767	0.800209	0.199791
WineEuropean4	AICOSW	775500	637735	137765	51388	86378	507499	130236	0.822353	0.177647	0.795784	0.204216
WineEuropean4	ARTOSW	775500	635823	139677	52596	87082	506291	129532	0.819888	0.180112	0.796277	0.203723
WineEuropean4	AFVOSW	775500	606609	168891	75824	93068	483063	123546	0.782217	0.217783	0.796333	0.203667
MosaicsR1	ASTOSW	775500	634841	140659	52899	87761	505988	128853	0.818622	0.181378	0.797031	0.202969
MosaicsR1	BHEOSW	775500	595482	180018	85904	94115	472983	122499	0.767868	0.232132	0.794286	0.205714
MosaicsR1	BHDOSW	775500	637057	138443	51955	86489	506932	130125	0.821479	0.178521	0.79574	0.20426
MosaicsR1	BHTOSW	775500	639336	136164	50939	85226	507948	131388	0.824418	0.175582	0.794493	0.205507
MosaicsR1	BHMOSW	775500	638624	136876	51033	85844	507854	130770	0.8235	0.1765	0.795232	0.204768
Other	XJ5	775500	601162	174338	78314	96025	480573	120589	0.775193	0.224807	0.799407	0.200593
Alpechin	YO_653	775500	665977	109523	31113	78411	527774	138203	0.858771	0.141229	0.792481	0.207519
Alpechin	YO_652	775500	660796	114704	32848	81857	526039	134757	0.85209	0.14791	0.796069	0.203931
Alpechin	AP_6_2	775500	632480	143020	53523	89498	505364	127116	0.815577	0.184423	0.79902	0.20098
Alpechin	SACE_YDM	775500	621472	154028	59685	94344	499202	122270	0.801382	0.198618	0.803257	0.196743
Alpechin	SACE_YAE	775500	622836	152664	58949	93716	499938	122898	0.803141	0.196859	0.80268	0.19732
Alpechin	AIEOSW	775500	615643	159857	69491	90367	489396	126247	0.793866	0.206134	0.794935	0.205065
Alpechin	PYCC_2613	775500	668060	107440	29872	77569	529015	139045	0.861457	0.138543	0.791867	0.208133
Alpechin	AIDOSW	775500	636138	139362	52524	86839	506363	129775	0.820294	0.179706	0.795996	0.204004
Alpechin	PYCC_6730	775500	671809	103691	28110	75582	530777	141032	0.866291	0.133709	0.790071	0.209929
Alpechin	AHMOSW	775500	638036	137464	51335	86130	507552	130484	0.822741	0.177259	0.795491	0.204509
Alpechin	ABMOSW	775500	637984	137516	51371	86146	507516	130468	0.822674	0.177326	0.7955	0.2045
Alpechin	ZIM_2221	775500	664808	110692	31554	79139	527333	137475	0.857264	0.142736	0.793211	0.206789
Alpechin	ZIM_2580	775500	665887	109613	31238	78376	527649	138238	0.858655	0.141345	0.7924	0.2076
Alpechin	MM_11	775500	664237	111263	31741	79523	527146	137091	0.856527	0.143473	0.793611	0.206389
Alpechin	PYCC_6733	775500	675586	99914	27152	72763	531735	143851	0.871162	0.128838	0.787072	0.212928
Alpechin	AQAOSW	775500	636234	139266	52296	86971	506591	129643	0.820418	0.179582	0.796234	0.203766
Alpechin	PYCC_6731	775500	672994	102506	27776	74731	531111	141883	0.867819	0.132181	0.789176	0.210824
Alpechin	ATQOSW	775500	576232	199268	99869	99400	459018	117214	0.743046	0.256954	0.796585	0.203415
Alpechin	AQDOSW	775500	606498	169002	75939	93064	482948	123550	0.782074	0.217926	0.79629	0.20371
Alpechin	CPGOSW	775500	637794	137706	51876	85831	507011	130783	0.822429	0.177571	0.794945	0.205055
Alpechin	CDTOSW	775500	637880	137620	51504	86117	507383	130497	0.82254	0.17746	0.795421	0.204579
Alpechin	AVBOSW	775500	638031	137469	51573	85897	507314	130717	0.822735	0.177265	0.795124	0.204876
Alpechin	CGEOSW	775500	635862	139638	52518	87121	506369	129493	0.819938	0.180062	0.79635	0.20365
Alpechin	CGDOSW	775500	635867	139633	52570	87064	506317	129550	0.819945	0.180055	0.796262	0.203738
Alpechin	SACE_YBR	775500	640071	135429	50375	85055	508512	131559	0.825366	0.174634	0.794462	0.205538
Alpechin	PYCC_6732	775500	675166	100334	27075	73260	531812	143354	0.87062	0.12938	0.787676	0.212324
Alpechin	BRKOSW	775500	636918	138582	51761	86822	507126	129792	0.8213	0.1787	0.796219	0.203781
Alpechin	AHLOSW	775500	639005	136495	50971	85525	507916	131089	0.823991	0.176009	0.794855	0.205145
Alpechin	YO_654	775500	661139	114361	33101	81261	525786	135353	0.852533	0.147467	0.795273	0.204727
Alpechin	PYCC_4891	775500	673580	101920	27995	73926	530892	142688	0.868575	0.131425	0.788165	0.211835
Alpechin	S27	775500	668457	107043	30988	76056	527899	140558	0.861969	0.138031	0.789728	0.210272
Alpechin	PYCC_2708	775500	677103	98397	26475	71923	532412	144691	0.873118	0.126882	0.786309	0.213691
Alpechin	NRRL_Y_12658	775500	672329	103171	29601	73571	529286	143043	0.866962	0.133038	0.787243	0.212757
Alpechin	PYCC_4935	775500	674806	100694	27288	73407	531599	143207	0.870156	0.129844	0.78778	0.21222
Alpechin	AP_7_2	775500	668330	107170	30598	76573	528289	140041	0.861805	0.138195	0.790461	0.209539
Alpechin	AP_16_1	775500	665801	109699	32168	77532	526719	139082	0.858544	0.141456	0.791106	0.208894
Alpechin	AP_17_1	775500	666865	108635	31525	77111	527362	139503	0.859916	0.140084	0.790808	0.209192
Alpechin	AP_5_4	775500	669926	105574	29814	75761	529073	140853	0.863863	0.136137	0.789748	0.210252
Alpechin	A8	775500	662178	113322	32572	80751	526315	135863	0.853872	0.146128	0.794824	0.205176
Other	F12_3B	775500	638775	136725	50928	85798	507959	130816	0.823694	0.176306	0.795208	0.204792
Other	ZP862	775500	354084	421416	259487	161930	299400	54684	0.456588	0.543412	0.845562	0.154438
MosaicsR1	ASVOSW	775500	613776	161724	70229	91496	488658	125118	0.791458	0.208542	0.79615	0.20385
MosaicsR1	SACE_YCI	775500	612495	163005	70484	92522	488403	124092	0.789807	0.210193	0.797399	0.202601
MosaicsR1	ACSOSW	775500	640194	135306	50230	85077	508657	131537	0.825524	0.174476	0.794536	0.205464
MosaicsR1	CPBOSW	775500	621407	154093	64040	90054	494847	126560	0.801299	0.198701	0.796333	0.203667
MosaicsR1	AMPOSW	775500	615705	159795	68781	91015	490106	125599	0.793946	0.206054	0.796008	0.203992
MosaicsR1	AHFOSW	775500	639368	136132	50523	85610	508364	131004	0.824459	0.175541	0.795104	0.204896
MosaicsR1	BHLOSW	775500	639135	136365	50964	85402	507923	131212	0.824159	0.175841	0.794704	0.205296
MosaicsR1	BHKOSW	775500	638829	136671	50982	85690	507905	130924	0.823764	0.176236	0.795056	0.204944
MosaicsR1	CHVOSW	775500	528762	246738	136687	110052	422200	106562	0.681834	0.318166	0.798469	0.201531
MosaicsR1	ACHOSW	775500	639709	135791	50318	85474	508569	131140	0.824899	0.175101	0.795001	0.204999
MosaicsR1	ACGOSW	775500	638465	137035	50896	86140	507991	130474	0.823295	0.176705	0.795644	0.204356
SouthAmericaMix3	L328	775500	591272	184228	76695	107534	482192	109080	0.76244	0.23756	0.815516	0.184484
SouthAmericaMix3	SP006	775500	621607	153893	62254	91640	496633	124974	0.801556	0.198444	0.79895	0.20105
SouthAmericaMix3	SP004	775500	626073	149427	57363	92065	501524	124549	0.807315	0.192685	0.801063	0.198937
SouthAmericaMix3	SACE_YBQ	775500	617099	158401	63749	94653	495138	121961	0.795743	0.204257	0.802364	0.197636
SouthAmericaMix3	AHBOSW	775500	639354	136146	50557	85590	508330	131024	0.824441	0.175559	0.795068	0.204932
SouthAmericaMix3	UFMG_CM_Y629	775500	674800	100700	27173	73528	531714	143086	0.870148	0.129852	0.787958	0.212042
SouthAmericaMix3	UFMG_CM_Y627	775500	671008	104492	29510	74983	529377	141631	0.865259	0.134741	0.788928	0.211072
SouthAmericaMix3	UFMG_CM_Y631	775500	671392	104108	29041	75068	529846	141546	0.865754	0.134246	0.789175	0.210825
SouthAmericaMix3	UFMG_CM_Y630	775500	664003	111497	30665	80833	528222	135781	0.856226	0.143774	0.795511	0.204489
SouthAmericaMix3	UFMG_CM_Y251	775500	664520	110980	30341	80640	528546	135974	0.856892	0.143108	0.79538	0.20462
SouthAmericaMix3	UFMG_CM_Y636	775500	542524	232976	114867	118110	444020	98504	0.69958	0.30042	0.818434	0.181566
SouthAmericaMix3	UFMG_CM_Y260	775500	620772	154728	60462	94267	498425	122347	0.80048	0.19952	0.802912	0.197088
SouthAmericaMix3	UFMG_CM_Y633	775500	670301	105199	28826	76374	530061	140240	0.864347	0.135653	0.790781	0.209219
SouthAmericaMix3	UFMG_CM_Y632	775500	676197	99303	27089	72215	531798	144399	0.87195	0.12805	0.786454	0.213546
SouthAmericaMix3	UFMG_CM_Y635	775500	677314	98186	26502	71685	532385	144929	0.87339	0.12661	0.786024	0.213976
SouthAmericaMix3	UFMG_CM_Y634	775500	674899	100601	27334	73268	531553	143346	0.870276	0.129724	0.787604	0.212396
Bioethanol	AFROSW	775500	630560	144940	57704	87237	501183	129377	0.813101	0.186899	0.794822	0.205178
Bioethanol	BVCOSW	775500	637755	137745	51590	86156	507297	130458	0.822379	0.177621	0.795442	0.204558
Bioethanol	CNQOSW	775500	639804	135696	50665	85032	508222	131582	0.825021	0.174979	0.79434	0.20566
Bioethanol	AGMOSW	775500	643089	132411	48956	83456	509931	133158	0.829257	0.170743	0.79294	0.20706
Bioethanol	AEGOSW	775500	638415	137085	50893	86193	507994	130421	0.82323	0.17677	0.795711	0.204289
Bioethanol	AHCOSW	775500	638367	137133	51118	86016	507769	130598	0.823168	0.176832	0.795419	0.204581
Bioethanol	AFDOSW	775500	638028	137472	51191	86282	507696	130332	0.822731	0.177269	0.795727	0.204273
Bioethanol	AEHOSW	775500	640669	134831	49954	84878	508933	131736	0.826137	0.173863	0.794377	0.205623
Bioethanol	BI005	775500	627907	147593	56450	91144	502437	125470	0.80968	0.19032	0.800177	0.199823
Bioethanol	CNVOSW	775500	640267	135233	50650	84584	508237	132030	0.825618	0.174382	0.793789	0.206211
Bioethanol	BVEOSW	775500	639949	135551	50568	84984	508319	131630	0.825208	0.174792	0.794312	0.205688
Bioethanol	BTTOSW	775500	637694	137806	51706	86101	507181	130513	0.8223	0.1777	0.795336	0.204664
Bioethanol	BTVOSW	775500	638738	136762	51085	85678	507802	130936	0.823647	0.176353	0.795008	0.204992
Bioethanol	APHOSW	775500	638049	137451	51292	86160	507595	130454	0.822758	0.177242	0.795542	0.204458
Bioethanol	BVAOSW	775500	639136	136364	50943	85422	507944	131192	0.82416	0.17584	0.794735	0.205265
Bioethanol	CNGOSW	775500	638166	137334	51362	85973	507525	130641	0.822909	0.177091	0.795287	0.204713
Bioethanol	CMTOSW	775500	633903	141597	53323	88275	505564	128339	0.817412	0.182588	0.797542	0.202458
Bioethanol	CNKOSW	775500	640113	135387	50733	84655	508154	131959	0.82542	0.17458	0.79385	0.20615
Bioethanol	CNROSW	775500	638161	137339	51549	85791	507338	130823	0.822903	0.177097	0.795	0.205
Bioethanol	CNPOSW	775500	636804	138696	52184	86513	506703	130101	0.821153	0.178847	0.795697	0.204303
Bioethanol	CNMOSW	775500	637586	137914	51785	86130	507102	130484	0.822161	0.177839	0.795347	0.204653
Bioethanol	APGOSW	775500	639799	135701	50530	85172	508357	131442	0.825015	0.174985	0.794557	0.205443
Bioethanol	BVBOSW	775500	640051	135449	50296	85154	508591	131460	0.82534	0.17466	0.79461	0.20539
Bioethanol	CNIOSW	775500	639696	135804	50788	85017	508099	131597	0.824882	0.175118	0.794282	0.205718
Bioethanol	CNHOSW	775500	639324	136176	50914	85263	507973	131351	0.824402	0.175598	0.794547	0.205453
Bioethanol	BVHOSW	775500	654798	120702	39115	81588	519772	135026	0.844356	0.155644	0.79379	0.20621
Bioethanol	BI002	775500	626285	149215	57335	91881	501552	124733	0.807589	0.192411	0.800837	0.199163
Bioethanol	BVDOSW	775500	637865	137635	51414	86222	507473	130392	0.822521	0.177479	0.795581	0.204419
Bioethanol	BVFOSW	775500	639260	136240	50996	85245	507891	131369	0.82432	0.17568	0.794498	0.205502
Bioethanol	CNTOSW	775500	638113	137387	51561	85827	507326	130787	0.822841	0.177159	0.795041	0.204959
Bioethanol	CNSOSW	775500	636693	138807	52108	86700	506779	129914	0.82101	0.17899	0.795955	0.204045
Bioethanol	CNNOSW	775500	638160	137340	51433	85908	507454	130706	0.822901	0.177099	0.795183	0.204817
Bioethanol	CNLOSW	775500	640812	134688	50378	84311	508509	132303	0.826321	0.173679	0.793539	0.206461
Bioethanol	CNFOSW	775500	639082	136418	51011	85408	507876	131206	0.82409	0.17591	0.794696	0.205304
Bioethanol	BVGOSW	775500	639766	135734	50632	85103	508255	131511	0.824972	0.175028	0.794439	0.205561
Bioethanol	CNEOSW	775500	640720	134780	50300	84481	508587	132133	0.826202	0.173798	0.793774	0.206226
Bioethanol	CNBOSW	775500	640979	134521	50168	84354	508719	132260	0.826536	0.173464	0.793659	0.206341
Other	DBQ22	775500	625252	150248	56361	93888	502526	122726	0.806257	0.193743	0.803718	0.196282
DairyProducts	WM7_1	775500	551520	223980	118847	105134	440040	111480	0.71118	0.28882	0.797868	0.202132
DairyProducts	QH45_2	775500	632709	142791	53244	89548	505643	127066	0.815872	0.184128	0.799171	0.200829
DairyProducts	QH25_4	775500	610801	164699	73427	91273	485460	125341	0.787622	0.212378	0.794792	0.205208
DairyProducts	QH21_3	775500	634091	141409	53585	87825	505302	128789	0.817654	0.182346	0.796892	0.203108
DairyProducts	QH1_3	775500	635361	140139	52840	87300	506047	129314	0.819292	0.180708	0.796472	0.203528
DairyProducts	BMEOSW	775500	640523	134977	50554	84424	508333	132190	0.825948	0.174052	0.793622	0.206378
DairyProducts	BFNOSW	775500	594246	181254	86425	94830	472462	121784	0.766275	0.233725	0.795061	0.204939
DairyProducts	AQMOSW	775500	558533	216967	111105	105863	447782	110751	0.720223	0.279777	0.801711	0.198289
DairyProducts	WM11_3	775500	632217	143283	54255	89029	504632	127585	0.815238	0.184762	0.798194	0.201806
DairyProducts	DX10_3	775500	597999	177501	82387	95115	476500	121499	0.771114	0.228886	0.796824	0.203176
DairyProducts	NQ13_1	775500	633655	141845	53459	88387	505428	128227	0.817092	0.182908	0.797639	0.202361
DairyProducts	LM1_2	775500	634415	141085	53134	87952	505753	128662	0.818072	0.181928	0.797196	0.202804
DairyProducts	ARSOSW	775500	628299	147201	60792	86410	498095	130204	0.810186	0.189814	0.792767	0.207233
DairyProducts	5_3004	775500	624134	151366	60725	90642	498162	125972	0.804815	0.195185	0.798165	0.201835
DairyProducts	11_3002	775500	618227	157273	65113	92161	493774	124453	0.797198	0.202802	0.798694	0.201306
DairyProducts	C5_1	775500	631749	143751	54510	89242	504377	127372	0.814634	0.185366	0.798382	0.201618
DairyProducts	F3_4	775500	632372	143128	54006	89123	504881	127491	0.815438	0.184562	0.798392	0.201608
DairyProducts	B1_1	775500	633597	141903	53377	88527	505510	128087	0.817017	0.182983	0.797842	0.202158
DairyProducts	ARNOSW	775500	634849	140651	53230	87422	505657	129192	0.818632	0.181368	0.7965	0.2035
DairyProducts	BGPOSW	775500	629524	145976	55554	90423	503333	126191	0.811765	0.188235	0.799545	0.200455
DairyProducts	BGMOSW	775500	636340	139160	52326	86835	506561	129779	0.820554	0.179446	0.796054	0.203946
DairyProducts	JZ1_4	775500	632142	143358	54168	89191	504719	127423	0.815141	0.184859	0.798427	0.201573
DairyProducts	BFHOSW	775500	637069	138431	52121	86311	506766	130303	0.821495	0.178505	0.795465	0.204535
DairyProducts	BGROSW	775500	579706	195794	98074	97721	460813	118893	0.747525	0.252475	0.794908	0.205092
DairyProducts	BGSOSW	775500	595422	180078	85798	94281	473089	122333	0.767791	0.232209	0.794544	0.205456
DairyProducts	BGKOSW	775500	637119	138381	51912	86470	506975	130144	0.821559	0.178441	0.79573	0.20427
DairyProducts	ASNOSW	775500	636477	139023	52563	86461	506324	130153	0.820731	0.179269	0.79551	0.20449
DairyProducts	BGIOSW	775500	636232	139268	52499	86770	506388	129844	0.820415	0.179585	0.795917	0.204083
DairyProducts	BGDOSW	775500	635727	139773	52570	87204	506317	129410	0.819764	0.180236	0.796438	0.203562
DairyProducts	ALDOSW	775500	636036	139464	52373	87092	506514	129522	0.820162	0.179838	0.796361	0.203639
DairyProducts	BGBOSW	775500	635162	140338	53024	87315	505863	129299	0.819035	0.180965	0.796431	0.203569
DairyProducts	BFSOSW	775500	635446	140054	52775	87280	506112	129334	0.819402	0.180598	0.796467	0.203533
DairyProducts	BGGOSW	775500	636412	139088	52301	86788	506586	129826	0.820647	0.179353	0.796003	0.203997
DairyProducts	BGFOSW	775500	635901	139599	52567	87033	506320	129581	0.819988	0.180012	0.796225	0.203775
DairyProducts	BGLOSW	775500	637230	138270	51906	86365	506981	130249	0.821702	0.178298	0.795601	0.204399
DairyProducts	ARROSW	775500	618062	157438	66020	91419	492867	125195	0.796985	0.203015	0.797439	0.202561
DairyProducts	BGEOSW	775500	634609	140891	53213	87679	505674	128935	0.818322	0.181678	0.796828	0.203172
DairyProducts	BFTOSW	775500	634276	141224	53294	87931	505593	128683	0.817893	0.182107	0.797118	0.202882
DairyProducts	CKVOSW	775500	637898	137602	51636	85967	507251	130647	0.822564	0.177436	0.795191	0.204809
DairyProducts	BGVOSW	775500	635545	139955	52866	87090	506021	129524	0.819529	0.180471	0.7962	0.2038
DairyProducts	BGTOSW	775500	636048	139452	52666	86787	506221	129827	0.820178	0.179822	0.795885	0.204115
DairyProducts	BGAOSW	775500	609905	165595	72940	92656	485947	123958	0.786467	0.213533	0.796759	0.203241
DairyProducts	BFVOSW	775500	599355	176145	81515	94631	477372	121983	0.772863	0.227137	0.796476	0.203524
DairyProducts	BGQOSW	775500	638106	137394	51619	85776	507268	130838	0.822832	0.177168	0.794959	0.205041
DairyProducts	BGCOSW	775500	605562	169938	76756	93183	482131	123431	0.780867	0.219133	0.796171	0.203829
DairyProducts	BGNOSW	775500	653008	122492	43708	78785	515179	137829	0.842048	0.157952	0.788932	0.211068
DairyProducts	BGHOSW	775500	635059	140441	52948	87494	505939	129120	0.818903	0.181097	0.79668	0.20332
Other	BPIOSW	775500	580786	194714	96852	97863	462035	118751	0.748918	0.251082	0.795534	0.204466
Other	SACE_YDB	775500	578292	197208	86739	110470	472148	106144	0.745702	0.254298	0.816453	0.183547
Other	BPNOSW	775500	638669	136831	51106	85726	507781	130888	0.823558	0.176442	0.795061	0.204939
AfricanBeer	AFLOSW	775500	607411	168089	75272	92818	483615	123796	0.783251	0.216749	0.796191	0.203809
AfricanBeer	ASCOSW	775500	637289	138211	51832	86380	507055	130234	0.821778	0.178222	0.795644	0.204356
AfricanBeer	AENOSW	775500	536363	239137	132120	107018	426767	109596	0.691635	0.308365	0.795668	0.204332
AfricanBeer	BDNOSW	775500	632665	142835	53615	89221	505272	127393	0.815816	0.184184	0.798641	0.201359
AfricanBeer	CESOSW	775500	623322	152178	61020	91159	497867	125455	0.803768	0.196232	0.798732	0.201268
AfricanBeer	CETOSW	775500	611031	164469	71522	92948	487365	123666	0.787919	0.212081	0.797611	0.202389
AfricanBeer	CEROSW	775500	634743	140757	52918	87840	505969	128774	0.818495	0.181505	0.797124	0.202876
AfricanBeer	BEMOSW	775500	636047	139453	52232	87222	506655	129392	0.820177	0.179823	0.796568	0.203432
AfricanBeer	BEKOSW	775500	636663	138837	51834	87004	507053	129610	0.820971	0.179029	0.796423	0.203577
AfricanBeer	BHAOSW	775500	636473	139027	52069	86959	506818	129655	0.820726	0.179274	0.796291	0.203709
AfricanBeer	BENOSW	775500	636354	139146	52094	87053	506793	129561	0.820573	0.179427	0.796401	0.203599
AfricanBeer	BEIOSW	775500	637278	138222	51643	86580	507244	130034	0.821764	0.178236	0.795954	0.204046
AfricanBeer	ANMOSW	775500	636543	138957	52132	86826	506755	129788	0.820816	0.179184	0.796105	0.203895
AfricanBeer	ANLOSW	775500	636730	138770	52082	86689	506805	129925	0.821057	0.178943	0.79595	0.20405
AfricanBeer	AVNOSW	775500	637815	137685	51710	85976	507177	130638	0.822456	0.177544	0.795179	0.204821
AfricanBeer	AVQOSW	775500	636108	139392	52559	86834	506328	129780	0.820255	0.179745	0.795978	0.204022
AfricanBeer	AVPOSW	775500	636188	139312	52277	87036	506610	129578	0.820358	0.179642	0.796321	0.203679
AfricanBeer	AVSOSW	775500	636930	138570	52211	86360	506676	130254	0.821315	0.178685	0.795497	0.204503
AfricanBeer	AVTOSW	775500	636985	138515	52040	86476	506847	130138	0.821386	0.178614	0.795697	0.204303
AfricanBeer	AVROSW	775500	636520	138980	52304	86677	506583	129937	0.820787	0.179213	0.795863	0.204137
MedOak	CCLOSW	775500	643588	131912	48505	83408	510382	133206	0.829901	0.170099	0.793026	0.206974
MedOak	DBVPG10100	775500	618453	157047	61638	95410	497249	121204	0.797489	0.202511	0.804021	0.195979
MedOak	CLDOSW	775500	625551	149949	62256	87694	496631	128920	0.806642	0.193358	0.79391	0.20609
MedOak	CLCOSW	775500	624662	150838	62294	88545	496593	128069	0.805496	0.194504	0.794979	0.205021
MedOak	CLBOSW	775500	642209	133291	49302	83990	509585	132624	0.828123	0.171877	0.793488	0.206512
MedOak	BFPOSW	775500	639408	136092	50567	85526	508320	131088	0.824511	0.175489	0.794985	0.205015
MedOak	DBQ26	775500	615331	160169	63868	96302	495019	120312	0.793464	0.206536	0.804476	0.195524
MedOak	BBSOSW	775500	641416	134084	49791	84294	509096	132320	0.8271	0.1729	0.793706	0.206294
MedOak	BBQOSW	775500	640293	135207	50248	84960	508639	131654	0.825652	0.174348	0.794385	0.205615
MedOak	ZP541	775500	625901	149599	56683	92917	502204	123697	0.807093	0.192907	0.80237	0.19763
MedOak	ZP742	775500	621134	154366	58049	96318	500838	120296	0.800946	0.199054	0.806328	0.193672
MedOak	ZP736	775500	619719	155781	60864	94918	498023	121696	0.799122	0.200878	0.803627	0.196373
MedOak	ZP851	775500	619637	155863	61392	94472	497495	122142	0.799016	0.200984	0.802881	0.197119
MedOak	ZP860	775500	630822	144678	54065	90614	504822	126000	0.813439	0.186561	0.800261	0.199739
MedOak	ZP850	775500	620083	155417	58774	96644	500113	119970	0.799591	0.200409	0.806526	0.193474
MedOak	ZP633	775500	617282	158218	62675	95544	496212	121070	0.795979	0.204021	0.803866	0.196134
MedOak	MIX2	775500	631650	143850	53549	90302	505338	126312	0.814507	0.185493	0.800028	0.199972
MedOak	MIX1	775500	626245	149255	56146	93110	502741	123504	0.807537	0.192463	0.802786	0.197214
MedOak	ZP562	775500	619245	156255	61019	95237	497868	121377	0.798511	0.201489	0.803992	0.196008
MedOak	ZP590	775500	627075	148425	56195	92231	502692	124383	0.808607	0.191393	0.801646	0.198354
MedOak	ZP570	775500	623761	151739	57028	94712	501859	121902	0.804334	0.195666	0.804569	0.195431
MedOak	ZP566	775500	628875	146625	54704	91922	504183	124692	0.810928	0.189072	0.801722	0.198278
MedOak	ZP636	775500	615206	160294	63791	96504	495096	120110	0.793302	0.206698	0.804765	0.195235
MedOak	ZP568	775500	619847	155653	61762	93892	497125	122722	0.799287	0.200713	0.802012	0.197988
MedOak	ZP564	775500	630375	145125	53891	91235	504996	125379	0.812863	0.187137	0.801104	0.198896
MedOak	ZP560	775500	620536	154964	60454	94511	498433	122103	0.800175	0.199825	0.80323	0.19677
MedOak	ZP561	775500	616006	159494	63528	95967	495359	120647	0.794334	0.205666	0.804146	0.195854
MedOak	ZP563	775500	607143	168357	65153	103205	493734	113409	0.782905	0.217095	0.813209	0.186791
MedOak	ZP575	775500	623224	152276	57527	94750	501360	121864	0.803642	0.196358	0.804462	0.195538
MedOak	ZP565	775500	616999	158501	62613	95889	496274	120725	0.795614	0.204386	0.804335	0.195665
MedOak	L761	775500	618828	156672	60430	96243	498457	120371	0.797973	0.202027	0.805486	0.194514
MedOak	BTGOSW	775500	639343	136157	50781	85377	508106	131237	0.824427	0.175573	0.794731	0.205269
MosaicsBeer	CBNOSW	775500	638586	136914	51290	85625	507597	130989	0.823451	0.176549	0.794876	0.205124
MosaicsBeer	BE003	775500	623528	151972	58978	92995	499909	123619	0.804034	0.195966	0.801743	0.198257
MosaicsBeer	AABOSW	775500	638836	136664	51034	85631	507853	130983	0.823773	0.176227	0.794966	0.205034
MosaicsBeer	WL011	775500	599429	176071	75590	100482	483297	116132	0.772958	0.227042	0.806262	0.193738
MosaicsBeer	WI019	775500	585211	190289	86901	103389	471986	113225	0.754624	0.245376	0.806523	0.193477
MosaicsBeer	BE002	775500	614319	161181	67926	93256	490961	123358	0.792159	0.207841	0.799196	0.200804
MosaicsBeer	AQGOSW	775500	624998	150502	61943	88560	496944	128054	0.805929	0.194071	0.795113	0.204887
MosaicsBeer	AAQOSW	775500	636688	138812	51931	86882	506956	129732	0.821003	0.178997	0.796239	0.203761
MosaicsBeer	CFFOSW	775500	640281	135219	50435	84785	508452	131829	0.825636	0.174364	0.794108	0.205892
MosaicsBeer	BE085	775500	417546	357954	221900	136055	336987	80559	0.538422	0.461578	0.807066	0.192934
MosaicsBeer	BE027	775500	625796	149704	57509	92196	501378	124418	0.806958	0.193042	0.801184	0.198816
MosaicsBeer	BE004	775500	628563	146937	56575	90363	502312	126251	0.810526	0.189474	0.799143	0.200857
MosaicsBeer	BE039	775500	590927	184573	88177	96397	470710	120217	0.761995	0.238005	0.796562	0.203438
MosaicsBeer	BE040	775500	584103	191397	91761	99637	467126	116977	0.753195	0.246805	0.799732	0.200268
MosaicsBeer	BE011	775500	573676	201824	99910	101915	458977	114699	0.73975	0.26025	0.800063	0.199937
MosaicsBeer	ASBOSW	775500	639819	135681	50566	85116	508321	131498	0.825041	0.174959	0.794476	0.205524
MosaicsBeer	APPOSW	775500	637717	137783	51529	86255	507358	130359	0.82233	0.17767	0.795585	0.204415
MosaicsBeer	BE063	775500	623494	152006	58373	93634	500514	122980	0.80399	0.19601	0.802757	0.197243
MosaicsBeer	CPDOSW	775500	609479	166021	74563	91459	484324	125155	0.785917	0.214083	0.794652	0.205348
MosaicsBeer	AIGOSW	775500	616057	159443	68725	90719	490162	125895	0.7944	0.2056	0.795644	0.204356
MosaicsBeer	SACE_YDD	775500	641318	134182	49792	84391	509095	132223	0.826974	0.173026	0.793826	0.206174
MosaicsBeer	AREOSW	775500	411127	364373	233596	130778	325291	85836	0.530144	0.469856	0.791218	0.208782
MosaicsBeer	BE092	775500	617297	158203	61636	96568	497251	120046	0.795999	0.204001	0.80553	0.19447
MosaicsBeer	WL016	775500	594538	180962	77985	102978	480902	113636	0.766651	0.233349	0.808867	0.191133
MosaicsBeer	WL015	775500	600145	175355	75004	100352	483883	116262	0.773881	0.226119	0.806277	0.193723
MosaicsBeer	BE021	775500	627160	148340	57078	91263	501809	125351	0.808717	0.191283	0.800129	0.199871
MosaicsBeer	BE080	775500	614063	161437	63371	98067	495516	118547	0.791828	0.208172	0.806947	0.193053
MosaicsBeer	BE013	775500	634683	140817	52915	87903	505972	128711	0.818418	0.181582	0.797204	0.202796
MosaicsBeer	BE083	775500	598600	176900	73101	103800	485786	112814	0.771889	0.228111	0.811537	0.188463
MosaicsBeer	BE084	775500	337503	437997	289424	148574	269463	68040	0.435207	0.564793	0.798402	0.201598
MosaicsBeer	BE034	775500	627022	148478	56978	91501	501909	125113	0.808539	0.191461	0.800465	0.199535
MosaicsBeer	AQHOSW	775500	639420	136080	50633	85448	508254	131166	0.824526	0.175474	0.794867	0.205133
MosaicsBeer	SACE_YAB	775500	620027	155473	59907	95567	498980	121047	0.799519	0.200481	0.804771	0.195229
MosaicsBeer	SACE_YAG	775500	623712	151788	58169	93620	500718	122994	0.804271	0.195729	0.802803	0.197197
MosaicsBeer	AEQOSW	775500	639398	136102	50600	85503	508287	131111	0.824498	0.175502	0.794946	0.205054
MosaicsBeer	AAROSW	775500	637976	137524	51366	86159	507521	130455	0.822664	0.177336	0.795517	0.204483
MosaicsBeer	BRMOSW	775500	638276	137224	51242	85983	507645	130631	0.823051	0.176949	0.795338	0.204662
MosaicsBeer	AEAOSW	775500	637859	137641	51349	86293	507538	130321	0.822513	0.177487	0.79569	0.20431
MosaicsBeer	BE086	775500	522744	252756	139361	113396	419526	103218	0.674074	0.325926	0.802546	0.197454
MosaicsBeer	BE059	775500	611565	163935	64883	99053	494004	117561	0.788607	0.211393	0.80777	0.19223
MosaicsBeer	AFPOSW	775500	637078	138422	51980	86443	506907	130171	0.821506	0.178494	0.795675	0.204325
MosaicsBeer	AFAOSW	775500	586665	188835	90079	98757	468808	117857	0.756499	0.243501	0.799107	0.200893
MosaicsBeer	BE091	775500	621912	153588	59149	94440	499738	122174	0.80195	0.19805	0.803551	0.196449
MosaicsBeer	BE062	775500	615643	159857	62331	97527	496556	119087	0.793866	0.206134	0.806565	0.193435
MosaicsBeer	BE032	775500	626974	148526	56932	91595	501955	125019	0.808477	0.191523	0.800599	0.199401
MosaicsBeer	AFBOSW	775500	639468	136032	50674	85359	508213	131255	0.824588	0.175412	0.794743	0.205257
MosaicsR2	SACE_YCF	775500	642076	133424	49601	83824	509286	132790	0.827951	0.172049	0.793186	0.206814
MosaicsR2	L214	775500	618524	156976	61052	95925	497835	120689	0.797581	0.202419	0.804876	0.195124
MosaicsR2	CDMOSW	775500	639222	136278	50820	85459	508067	131155	0.824271	0.175729	0.794821	0.205179
MosaicsR2	AFQOSW	775500	639824	135676	50396	85281	508491	131333	0.825047	0.174953	0.794736	0.205264
MosaicsR2	AEROSW	775500	639188	136312	51008	85305	507879	131309	0.824227	0.175773	0.794569	0.205431
MosaicsR2	CFTOSW	775500	586570	188930	92484	96447	466403	120167	0.756377	0.243623	0.795136	0.204864
MosaicsR2	BDKOSW	775500	628611	146889	58539	88351	500348	128263	0.810588	0.189412	0.795958	0.204042
MosaicsR2	BDDOSW	775500	637983	137517	51685	85833	507202	130781	0.822673	0.177327	0.795009	0.204991
MosaicsR2	BDBOSW	775500	637461	138039	51762	86278	507125	130336	0.822	0.178	0.795539	0.204461
MosaicsR2	BCVOSW	775500	637712	137788	51604	86185	507283	130429	0.822324	0.177676	0.795474	0.204526
MosaicsR2	BDIOSW	775500	629529	145971	58343	87629	500544	128985	0.811772	0.188228	0.795109	0.204891
MosaicsR2	BDAOSW	775500	628390	147110	58756	88355	500131	128259	0.810303	0.189697	0.795893	0.204107
MosaicsR2	BDHOSW	775500	637932	137568	51556	86013	507331	130601	0.822607	0.177393	0.795274	0.204726
MosaicsR2	BDEOSW	775500	637592	137908	51783	86126	507104	130488	0.822169	0.177831	0.795342	0.204658
MosaicsR2	SACE_YCT	775500	622531	152969	58737	94233	500150	122381	0.802748	0.197252	0.803414	0.196586
MosaicsR2	BHGOSW	775500	639783	135717	50549	85169	508338	131445	0.824994	0.175006	0.794548	0.205452
MosaicsR2	BHIOSW	775500	624093	151407	62251	89157	496636	127457	0.804762	0.195238	0.795772	0.204228
MosaicsR2	BHHOSW	775500	638852	136648	50847	85802	508040	130812	0.823794	0.176206	0.795239	0.204761
MosaicsR2	SACE_YCC	775500	630819	144681	57704	86978	501183	129636	0.813435	0.186565	0.794496	0.205504
MosaicsR2	SACE_YCZ	775500	613061	162439	68086	94354	490801	122260	0.790536	0.209464	0.800574	0.199426
MosaicsR2	SACE_MAA	775500	505494	270006	142488	127519	416399	89095	0.65183	0.34817	0.823747	0.176253
Other	SACE_YBW	775500	643846	131654	48834	82821	510053	133793	0.830233	0.169767	0.792197	0.207803
MixOrigin	AFFOSW	775500	638457	137043	51394	85650	507493	130964	0.823284	0.176716	0.794874	0.205126
MixOrigin	AHVOSW	775500	599488	176012	81309	94704	477578	121910	0.773034	0.226966	0.796643	0.203357
MixOrigin	ANPOSW	775500	598612	176888	83506	93383	475381	123231	0.771905	0.228095	0.794139	0.205861
MixOrigin	AAMOSW	775500	637954	137546	51384	86163	507503	130451	0.822636	0.177364	0.795517	0.204483
MixOrigin	AALOSW	775500	626223	149277	61219	88059	497668	128555	0.807509	0.192491	0.794714	0.205286
MixOrigin	CHLOSW	775500	546003	229497	124577	104921	434310	111693	0.704066	0.295934	0.795435	0.204565
MixOrigin	BMGOSW	775500	642405	133095	49605	83491	509282	133123	0.828375	0.171625	0.792774	0.207226
MixOrigin	CDROSW	775500	638480	137020	51371	85650	507516	130964	0.823314	0.176686	0.794882	0.205118
MixOrigin	BBPOSW	775500	638948	136552	51019	85534	507868	131080	0.823917	0.176083	0.79485	0.20515
MixOrigin	ATSOSW	775500	640187	135313	50408	84906	508479	131708	0.825515	0.174485	0.794266	0.205734
MixOrigin	ADPOSW	775500	532828	242672	134675	107998	424212	108616	0.687077	0.312923	0.796152	0.203848
MixOrigin	CIEOSW	775500	639066	136434	51185	85250	507702	131364	0.82407	0.17593	0.794444	0.205556
MixOrigin	UFMG_CM_Y228	775500	670216	105284	29814	75471	529073	141143	0.864237	0.135763	0.789407	0.210593
MixOrigin	SXJM4_1	775500	616323	159177	70512	88666	488375	127948	0.794743	0.205257	0.792401	0.207599
MixOrigin	LSF_1	775500	638380	137120	51258	85863	507629	130751	0.823185	0.176815	0.795183	0.204817
MixOrigin	MLAF_1	775500	593427	182073	90043	92031	468844	124583	0.765219	0.234781	0.790062	0.209938
MixOrigin	DBL_1	775500	659741	115759	37532	78228	521355	138386	0.85073	0.14927	0.790242	0.209758
MixOrigin	AMKOSW	775500	642200	133300	49486	83815	509401	132799	0.828111	0.171889	0.793212	0.206788
MixOrigin	AMLOSW	775500	640829	134671	50196	84476	508691	132138	0.826343	0.173657	0.793801	0.206199
MixOrigin	APNOSW	775500	641078	134422	50064	84359	508823	132255	0.826664	0.173336	0.793699	0.206301
MixOrigin	AMIOSW	775500	642787	132713	49087	83627	509800	132987	0.828868	0.171132	0.793109	0.206891
MixOrigin	AMGOSW	775500	638944	136556	51130	85427	507757	131187	0.823912	0.176088	0.794682	0.205318
MixOrigin	APKOSW	775500	640444	135056	50428	84629	508459	131985	0.825847	0.174153	0.793916	0.206084
MixOrigin	AMQOSW	775500	639073	136427	50898	85530	507989	131084	0.824079	0.175921	0.794884	0.205116
MixOrigin	ASPOSW	775500	639337	136163	50899	85265	507988	131349	0.824419	0.175581	0.794554	0.205446
MixOrigin	AGKOSW	775500	642888	132612	49146	83467	509741	133147	0.828998	0.171002	0.792892	0.207108
MixOrigin	BTCOSW	775500	639677	135823	50664	85160	508223	131454	0.824858	0.175142	0.794499	0.205501
MixOrigin	AGEOSW	775500	638768	136732	51151	85582	507736	131032	0.823685	0.176315	0.794868	0.205132
MixOrigin	BCROSW	775500	640125	135375	50598	84778	508289	131836	0.825435	0.174565	0.794046	0.205954
MixOrigin	BCTOSW	775500	639717	135783	50841	84943	508046	131671	0.824909	0.175091	0.794173	0.205827
MixOrigin	BCSOSW	775500	639601	135899	50833	85067	508054	131547	0.82476	0.17524	0.79433	0.20567
MixOrigin	AFTOSW	775500	636895	138605	52129	86477	506758	130137	0.82127	0.17873	0.79567	0.20433
MixOrigin	AEMOSW	775500	600165	175335	81248	94088	477639	122526	0.773907	0.226093	0.795846	0.204154
MixOrigin	AQIOSW	775500	637246	138254	51937	86318	506950	130296	0.821723	0.178277	0.795533	0.204467
MixOrigin	ATROSW	775500	637390	138110	51919	86192	506968	130422	0.821908	0.178092	0.795381	0.204619
MixOrigin	AFEOSW	775500	628840	146660	58428	88233	500459	128381	0.810883	0.189117	0.795845	0.204155
MixOrigin	AFCOSW	775500	554981	220519	118755	101765	440132	114849	0.715643	0.284357	0.793058	0.206942
MixOrigin	APMOSW	775500	616567	158933	69114	89820	489773	126794	0.795057	0.204943	0.794355	0.205645
MixOrigin	APIOSW	775500	587632	187868	92247	95622	466640	120992	0.757746	0.242254	0.794102	0.205898
MixOrigin	BS	775500	599375	176125	79002	97124	479885	119490	0.772888	0.227112	0.800642	0.199358
MixOrigin	BTFOSW	775500	619543	155957	67797	88161	491090	128453	0.798895	0.201105	0.792665	0.207335
MixOrigin	ASLOSW	775500	571076	204424	105115	99310	453772	117304	0.736397	0.263603	0.794591	0.205409
MixOrigin	AGCOSW	775500	502496	273004	156841	116164	402046	100450	0.647964	0.352036	0.800098	0.199902
Other	AFSOSW	775500	636430	139070	52160	86911	506727	129703	0.820671	0.179329	0.796202	0.203798
Other	SP010	775500	621331	154169	59312	94858	499575	121756	0.801201	0.198799	0.80404	0.19596
Other	AAHOSW	775500	639603	135897	50606	85292	508281	131322	0.824762	0.175238	0.794682	0.205318
Other	SP008	775500	617012	158488	61891	96598	496996	120016	0.795631	0.204369	0.805488	0.194512
Other	SP007	775500	626333	149167	57267	91901	501620	124713	0.807651	0.192349	0.800884	0.199116
Other	L174	775500	602604	172896	68297	104600	490590	112014	0.777052	0.222948	0.814117	0.185883
Other	SP009	775500	617710	157790	61325	96466	497562	120148	0.796531	0.203469	0.805494	0.194506
MixOrigin	TUM506	775500	672161	103339	28240	75100	530647	141514	0.866745	0.133255	0.789464	0.210536
MixOrigin	ABVOSW	775500	640902	134598	50139	84460	508748	132154	0.826437	0.173563	0.7938	0.2062
MixOrigin	BBCOSW	775500	642226	133274	49602	83673	509285	132941	0.828144	0.171856	0.793	0.207
MixOrigin	ALVOSW	775500	639334	136166	50847	85320	508040	131294	0.824415	0.175585	0.794639	0.205361
MixOrigin	XST	775500	317666	457834	304549	153286	254338	63328	0.409627	0.590373	0.800646	0.199354
MixOrigin	AF	775500	652508	122992	40136	82857	518751	133757	0.841403	0.158597	0.795011	0.204989
MixOrigin	SP001	775500	640927	134573	50228	84346	508659	132268	0.826469	0.173531	0.79363	0.20637
MixOrigin	CFPOSW	775500	640904	134596	50324	84273	508563	132341	0.82644	0.17356	0.793509	0.206491
MixOrigin	BE029	775500	628206	147294	56549	90746	502338	125868	0.810066	0.189934	0.799639	0.200361
MixOrigin	BE006	775500	636376	139124	52354	86771	506533	129843	0.820601	0.179399	0.795965	0.204035
MixOrigin	AMNOSW	775500	640778	134722	50316	84407	508571	132207	0.826277	0.173723	0.793677	0.206323
MixOrigin	BE028	775500	630746	144754	55288	89467	503599	127147	0.813341	0.186659	0.798418	0.201582
MixOrigin	ANG1	775500	638127	137373	51398	85976	507489	130638	0.822859	0.177141	0.795279	0.204721
MixOrigin	AFB_1	775500	638092	137408	51710	85699	507177	130915	0.822814	0.177186	0.794834	0.205166
MixOrigin	BBFOSW	775500	639265	136235	50871	85365	508016	131249	0.824326	0.175674	0.794688	0.205312
MixOrigin	AAPOSW	775500	630225	145275	57590	87686	501297	128928	0.812669	0.187331	0.795425	0.204575
MixOrigin	UFMG_CM_Y622	775500	670954	104546	28730	75817	530157	140797	0.865189	0.134811	0.790154	0.209846
MixOrigin	UFMG_CM_Y223	775500	681322	94178	25512	68667	533375	147947	0.878558	0.121442	0.782853	0.217147
MixOrigin	CHIOSW	775500	639540	135960	50609	85352	508278	131262	0.824681	0.175319	0.794756	0.205244
MixOrigin	AANOSW	775500	618506	156994	66424	90571	492463	126043	0.797558	0.202442	0.796214	0.203786
MixOrigin	BBEOSW	775500	640833	134667	50159	84509	508728	132105	0.826348	0.173652	0.793854	0.206146
MixOrigin	BBDOSW	775500	611587	163913	73521	90393	485366	126221	0.788636	0.211364	0.793617	0.206383
MixOrigin	ALPOSW	775500	617417	158083	68641	89443	490246	127171	0.796153	0.203847	0.794027	0.205973
MixOrigin	ALNOSW	775500	618450	157050	67798	89253	491089	127361	0.797485	0.202515	0.794064	0.205936
MixOrigin	APLOSW	775500	635140	140360	54089	86272	504798	130342	0.819007	0.180993	0.794782	0.205218
MixOrigin	AEVOSW	775500	581905	193595	96099	97497	462788	119117	0.750361	0.249639	0.795298	0.204702
MixOrigin	CHKOSW	775500	617372	158128	68699	89430	490188	127184	0.796095	0.203905	0.793991	0.206009
MixOrigin	BE005	775500	629519	145981	56216	89766	502671	126848	0.811759	0.188241	0.7985	0.2015
MixOrigin	CFNOSW	775500	640331	135169	50625	84545	508262	132069	0.825701	0.174299	0.793749	0.206251
MixOrigin	CFIOSW	775500	641550	133950	50157	83794	508730	132820	0.827273	0.172727	0.79297	0.20703
MixOrigin	YUC22_34C	775500	649698	125802	41835	83968	517052	132646	0.837779	0.162221	0.795834	0.204166
MixOrigin	CHHOSW	775500	582568	192932	95630	97303	463257	119311	0.751216	0.248784	0.795198	0.204802
MixOrigin	AP13_1	775500	668910	106590	30583	76008	528304	140606	0.862553	0.137447	0.789798	0.210202
MixOrigin	BR004	775500	627885	147615	56684	90932	502203	125682	0.809652	0.190348	0.799833	0.200167
MixOrigin	BE023	775500	628752	146748	56435	90314	502452	126300	0.81077	0.18923	0.799126	0.200874
MixOrigin	ADLOSW	775500	570440	205060	105300	99761	453587	116853	0.735577	0.264423	0.795153	0.204847
MixOrigin	BDLOSW	775500	635867	139633	53731	85903	505156	130711	0.819945	0.180055	0.794437	0.205563
MixOrigin	BE061	775500	605166	170334	69211	101124	489676	115490	0.780356	0.219644	0.80916	0.19084
MixOrigin	BTDOSW	775500	657493	118007	38314	79694	520573	136920	0.847831	0.152169	0.791754	0.208246
MixOrigin	SP003	775500	630924	144576	55247	89330	503640	127284	0.813571	0.186429	0.798258	0.201742
MixOrigin	BE038	775500	629789	145711	55960	89752	502927	126862	0.812107	0.187893	0.798564	0.201436
MixOrigin	BFMOSW	775500	640928	134572	50138	84435	508749	132179	0.826471	0.173529	0.793769	0.206231
MixOrigin	BFGOSW	775500	639557	135943	50804	85140	508083	131474	0.824703	0.175297	0.79443	0.20557
MixOrigin	BFEOSW	775500	641560	133940	49850	84091	509037	132523	0.827286	0.172714	0.793436	0.206564
MixOrigin	YA5_46D	775500	534234	241266	132954	108313	425933	108301	0.68889	0.31111	0.797278	0.202722
MixOrigin	TUM480	775500	670680	104820	29326	75495	529561	141119	0.864836	0.135164	0.789588	0.210412
MixOrigin	CHROSW	775500	638998	136502	50972	85531	507915	131083	0.823982	0.176018	0.794862	0.205138
MixOrigin	CHGOSW	775500	637972	137528	51598	85931	507289	130683	0.822659	0.177341	0.795159	0.204841
MixOrigin	AKTOSW	775500	638092	137408	51432	85977	507455	130637	0.822814	0.177186	0.795269	0.204731
MixOrigin	YP4_40D	775500	644063	131437	44204	87234	514683	129380	0.830513	0.169487	0.799119	0.200881
MixOrigin	ADMOSW	775500	640862	134638	50205	84434	508682	132180	0.826386	0.173614	0.793747	0.206253
MixOrigin	BR003	775500	629129	146371	56230	90142	502657	126472	0.811256	0.188744	0.798973	0.201027
MixOrigin	YA5_46A	775500	658254	117246	38141	79106	520746	137508	0.848812	0.151188	0.791102	0.208898
MixOrigin	BIBV5_3	775500	622095	153405	59669	93737	499218	122877	0.802186	0.197814	0.802479	0.197521
MixOrigin	YVPC7_6	775500	633816	141684	53712	87973	505175	128641	0.8173	0.1827	0.797037	0.202963
MixOrigin	Y13EU	775500	648155	127345	42392	84954	516495	131660	0.83579	0.16421	0.79687	0.20313
MixOrigin	BR002	775500	625480	150020	58038	91983	500849	124631	0.806551	0.193449	0.800743	0.199257
MixOrigin	L560	775500	619720	155780	60166	95615	498721	120999	0.799123	0.200877	0.804752	0.195248
MixOrigin	BMLOSW	775500	642830	132670	49504	83167	509383	133447	0.828923	0.171077	0.792407	0.207593
MixOrigin	YUC22	775500	634429	141071	53545	87527	505342	129087	0.81809	0.18191	0.79653	0.20347
MixOrigin	YA5	775500	646244	129256	43334	85923	515553	130691	0.833326	0.166674	0.797768	0.202232
MixOrigin	WL006	775500	620016	155484	60340	95145	498547	121469	0.799505	0.200495	0.804087	0.195913
MixOrigin	WL007	775500	621922	153578	59353	94226	499534	122388	0.801963	0.198037	0.80321	0.19679
MixOrigin	WL005	775500	474322	301178	180626	120553	378261	96061	0.611634	0.388366	0.797477	0.202523
MixOrigin	BE025	775500	631186	144314	54925	89390	503962	127224	0.813908	0.186092	0.798437	0.201563
MixOrigin	BR001	775500	631210	144290	55103	89188	503784	127426	0.813939	0.186061	0.798124	0.201876
MixOrigin	CLAOSW	775500	641329	134171	50072	84100	508815	132514	0.826988	0.173012	0.793376	0.206624
MixOrigin	CKSOSW	775500	642509	132991	49440	83552	509447	133062	0.828509	0.171491	0.792903	0.207097
MixOrigin	BMMOSW	775500	640482	135018	50580	84439	508307	132175	0.825896	0.174104	0.793632	0.206368
MixOrigin	BTEOSW	775500	642209	133291	49794	83498	509093	133116	0.828123	0.171877	0.792722	0.207278
MixOrigin	CKKOSW	775500	636821	138679	52141	86539	506746	130075	0.821175	0.178825	0.795743	0.204257
MixOrigin	CBFOSW	775500	640997	134503	50275	84229	508612	132385	0.82656	0.17344	0.79347	0.20653
Beer	BE052	775500	614533	160967	63345	97623	495542	118991	0.792435	0.207565	0.806372	0.193628
Beer	BE097	775500	620930	154570	59908	94663	498979	121951	0.800683	0.199317	0.803599	0.196401
Beer	BE095	775500	621895	153605	59498	94108	499389	122506	0.801928	0.198072	0.803012	0.196988
Beer	CFCOSW	775500	640087	135413	50623	84791	508264	131823	0.825386	0.174614	0.794055	0.205945
Beer	BE096	775500	624702	150798	57897	92902	500990	123712	0.805547	0.194453	0.801966	0.198034
Beer	TUM507	775500	671175	104325	29116	75210	529771	141404	0.865474	0.134526	0.789319	0.210681
Beer	TUM149	775500	648157	127343	38561	88783	520326	127831	0.835792	0.164208	0.802778	0.197222
Beer	TUM381	775500	672852	102648	27764	74885	531123	141729	0.867636	0.132364	0.789361	0.210639
Beer	TUM175	775500	668190	107310	30131	77180	528756	139434	0.861625	0.138375	0.791326	0.208674
Beer	BE072	775500	608880	166620	66871	99750	492016	116864	0.785145	0.214855	0.808067	0.191933
Beer	BE093	775500	620750	154750	59675	95076	499212	121538	0.800451	0.199549	0.804208	0.195792
Beer	BE074	775500	619543	155957	60350	95608	498537	121006	0.798895	0.201105	0.804685	0.195315
Beer	TUM205	775500	672282	103218	28120	75099	530767	141515	0.866901	0.133099	0.789501	0.210499
Beer	BE017	775500	627674	147826	56828	90999	502059	125615	0.80938	0.19062	0.799872	0.200128
Beer	BE015	775500	626447	149053	57531	91523	501356	125091	0.807798	0.192202	0.800317	0.199683
Beer	AQTOSW	775500	637151	138349	52172	86178	506715	130436	0.8216	0.1784	0.795282	0.204718
Beer	WL014	775500	601647	173853	74111	99743	484776	116871	0.775818	0.224182	0.805748	0.194252
Beer	BE081	775500	614264	161236	63661	97576	495226	119038	0.792088	0.207912	0.80621	0.19379
Beer	BE043	775500	631222	144278	55324	88955	503563	127659	0.813955	0.186045	0.797759	0.202241
Beer	BE016	775500	630176	145324	55737	89588	503150	127026	0.812606	0.187394	0.798428	0.201572
Beer	BSIOSW	775500	640130	135370	50825	84546	508062	132068	0.825442	0.174558	0.793686	0.206314
Beer	SP005	775500	628866	146634	56515	90120	502372	126494	0.810917	0.189083	0.798854	0.201146
Beer	BE026	775500	630059	145441	55806	89636	503081	126978	0.812455	0.187545	0.798466	0.201534
Beer	BE022	775500	628583	146917	56427	90491	502460	126123	0.810552	0.189448	0.799353	0.200647
Beer	BE076	775500	623199	152301	58495	93807	500392	122807	0.803609	0.196391	0.802941	0.197059
Beer	BRPOSW	775500	641007	134493	50356	84138	508531	132476	0.826573	0.173427	0.793331	0.206669
Beer	BE077	775500	618617	156883	60938	95946	497949	120668	0.797701	0.202299	0.804939	0.195061
Beer	BE075	775500	620355	155145	60103	95043	498784	121571	0.799942	0.200058	0.80403	0.19597
Beer	BE078	775500	618499	157001	61179	95823	497708	120791	0.797549	0.202451	0.804703	0.195297
Beer	BE031	775500	627426	148074	57014	91061	501873	125553	0.80906	0.19094	0.799892	0.200108
Beer	BBGOSW	775500	638545	136955	51649	85307	507238	131307	0.823398	0.176602	0.794365	0.205635
Beer	ASHOSW	775500	635651	139849	52810	87040	506077	129574	0.819666	0.180334	0.796155	0.203845
Beer	AEBOSW	775500	638204	137296	51380	85917	507507	130697	0.822958	0.177042	0.795211	0.204789
Beer	TUM338	775500	673285	102215	28879	73337	530008	143277	0.868195	0.131805	0.787197	0.212803
Beer	BE046	775500	601962	173538	71609	101930	487278	114684	0.776224	0.223776	0.809483	0.190517
Beer	CGCOSW	775500	637703	137797	52012	85786	506875	130828	0.822312	0.177688	0.794845	0.205155
Beer	BE008	775500	627209	148291	57627	90665	501260	125949	0.80878	0.19122	0.799191	0.200809
Beer	TUM177	775500	659113	116387	35568	80820	523319	135794	0.84992	0.15008	0.793975	0.206025
Beer	TUM513	775500	669794	105706	30333	75374	528554	141240	0.863693	0.136307	0.789129	0.210871
Beer	TUM308	775500	667219	108281	30780	77502	528107	139112	0.860373	0.139627	0.791505	0.208495
Beer	TUM174	775500	662586	112914	32602	80313	526285	136301	0.854398	0.145602	0.794289	0.205711
Beer	BRQOSW	775500	640425	135075	50681	84395	508206	132219	0.825822	0.174178	0.793545	0.206455
Beer	BE041	775500	625265	150235	58375	91861	500512	124753	0.806273	0.193727	0.80048	0.19952
Beer	TUM148	775500	673342	102158	28690	73469	530197	143145	0.868268	0.131732	0.787411	0.212589
Beer	BE012	775500	626943	148557	57618	90940	501269	125674	0.808437	0.191563	0.799545	0.200455
Beer	BE087	775500	619830	155670	60465	95206	498422	121408	0.799265	0.200735	0.804127	0.195873
Beer	BE073	775500	618314	157186	61494	95693	497393	120921	0.79731	0.20269	0.804434	0.195566
Beer	AGBOSW	775500	617825	157675	62449	95227	496438	121387	0.79668	0.20332	0.803525	0.196475
Beer	TUM213	775500	668818	106682	30235	76448	528652	140166	0.862435	0.137565	0.790427	0.209573
Beer	ATVOSW	775500	639549	135951	51066	84886	507821	131728	0.824692	0.175308	0.79403	0.20597
Beer	BE060	775500	619342	156158	60502	95657	498385	120957	0.798636	0.201364	0.804701	0.195299
Beer	BE035	775500	633148	142352	54132	88221	504755	128393	0.816438	0.183562	0.797215	0.202785
Beer	BE058	775500	607994	167506	67339	100168	491548	116446	0.784003	0.215997	0.808475	0.191525
Beer	BE042	775500	625894	149606	57772	91835	501115	124779	0.807084	0.192916	0.800639	0.199361
Beer	AECOSW	775500	638815	136685	51235	85451	507652	131163	0.823746	0.176254	0.794678	0.205322
Beer	BE051	775500	613978	161522	63328	98195	495559	118419	0.791719	0.208281	0.807128	0.192872
Beer	BE068	775500	553634	221866	104777	117090	454110	99524	0.713906	0.286094	0.820235	0.179765
Beer	BE044	775500	556206	219294	102482	116813	456405	99801	0.717222	0.282778	0.820568	0.179432
Beer	BE065	775500	612553	162947	64874	98074	494013	118540	0.789881	0.210119	0.806482	0.193518
Beer	BE082	775500	614390	161110	63801	97310	495086	119304	0.79225	0.20775	0.805817	0.194183
Beer	CFMOSW	775500	637079	138421	52429	85993	506458	130621	0.821507	0.178493	0.794969	0.205031
Beer	BE071	775500	619298	156202	60962	95241	497925	121373	0.798579	0.201421	0.804015	0.195985
Beer	BE067	775500	620238	155262	60495	94768	498392	121846	0.799791	0.200209	0.80355	0.19645
Beer	BE007	775500	627169	148331	57763	90569	501124	126045	0.808729	0.191271	0.799025	0.200975
Beer	CFDOSW	775500	637215	138285	52192	86094	506695	130520	0.821683	0.178317	0.795171	0.204829
Beer	BE102	775500	621742	153758	59957	93802	498930	122812	0.80173	0.19827	0.802471	0.197529
Beer	BE098	775500	623152	152348	58853	93496	500034	123118	0.803549	0.196451	0.802427	0.197573
Beer	AACOSW	775500	639138	136362	51094	85269	507793	131345	0.824162	0.175838	0.794497	0.205503
Beer	BE057	775500	615635	159865	63009	96857	495878	119757	0.793856	0.206144	0.805474	0.194526
Beer	BE019	775500	628173	147327	56644	90684	502243	125930	0.810023	0.189977	0.79953	0.20047
Beer	TUM165	775500	664103	111397	33042	78356	525845	138258	0.856355	0.143645	0.791812	0.208188
Beer	BE066	775500	608056	167444	67782	99663	491105	116951	0.784083	0.215917	0.807664	0.192336
Beer	BE045	775500	608299	167201	67445	99757	491442	116857	0.784396	0.215604	0.807895	0.192105
Beer	BE094	775500	615474	160026	62861	97166	496026	119448	0.793648	0.206352	0.805925	0.194075
Beer	BE050	775500	615534	159966	62682	97285	496205	119329	0.793725	0.206275	0.806137	0.193863
Beer	BE099	775500	626471	149029	56991	92039	501896	124575	0.807828	0.192172	0.801148	0.198852
Beer	BE090	775500	618183	157317	61380	95938	497507	120676	0.797141	0.202859	0.804789	0.195211
Beer	TUM211	775500	664404	111096	32456	78641	526431	137973	0.856743	0.143257	0.792336	0.207664
Beer	BE055	775500	614245	161255	63721	97535	495166	119079	0.792063	0.207937	0.806138	0.193862
Beer	BE069	775500	617452	158048	61712	96337	497175	120277	0.796199	0.203801	0.805204	0.194796
Beer	TUM210	775500	656314	119186	35726	83461	523161	133153	0.846311	0.153689	0.79712	0.20288
Beer	BE001	775500	629986	145514	56523	88992	502364	127622	0.812361	0.187639	0.797421	0.202579
Beer	BE070	775500	594022	181478	76238	105241	482649	111373	0.765986	0.234014	0.81251	0.18749
Beer	BE053	775500	608649	166851	67199	99653	491688	116961	0.784847	0.215153	0.807835	0.192165
Beer	BE056	775500	611417	164083	65469	98615	493418	117999	0.788417	0.211583	0.807007	0.192993
Beer	BE064	775500	620828	154672	59855	94818	499032	121796	0.800552	0.199448	0.803817	0.196183
Beer	CFHOSW	775500	641117	134383	50249	84135	508638	132479	0.826714	0.173286	0.793362	0.206638
Beer	BE100	775500	625105	150395	57679	92717	501208	123897	0.806067	0.193933	0.801798	0.198202
Beer	TUM508	775500	677454	98046	26829	71218	532058	145396	0.873571	0.126429	0.785379	0.214621
Beer	BE047	775500	615816	159684	62689	96996	496198	119618	0.794089	0.205911	0.805757	0.194243
Beer	WI012	775500	630201	145299	55678	89622	503209	126992	0.812638	0.187362	0.79849	0.20151
Beer	BE009	775500	628930	146570	56091	90480	502796	126134	0.810999	0.189001	0.799447	0.200553
Beer	BE089	775500	614022	161478	63689	97790	495198	118824	0.791776	0.208224	0.806483	0.193517
Beer	BE079	775500	618107	157393	61667	95727	497220	120887	0.797043	0.202957	0.804424	0.195576
Beer	BE036	775500	629060	146440	56251	90190	502636	126424	0.811167	0.188833	0.799027	0.200973
Beer	BE010	775500	626033	149467	58029	91439	500858	125175	0.807264	0.192736	0.80005	0.19995
Beer	BE037	775500	629385	146115	56146	89970	502741	126644	0.811586	0.188414	0.798781	0.201219
Beer	BE048	775500	615593	159907	62870	97038	496017	119576	0.793801	0.206199	0.805755	0.194245
Beer	BE054	775500	612735	162765	64440	98326	494447	118288	0.790116	0.209884	0.806951	0.193049
Beer	BE049	775500	617037	158463	61757	96707	497130	119907	0.795663	0.204337	0.805673	0.194327
Beer	CBROSW	775500	639303	136197	51130	85068	507757	131546	0.824375	0.175625	0.794235	0.205765
Beer	CFGOSW	775500	640752	134748	50448	84301	508439	132313	0.826244	0.173756	0.793504	0.206496
Beer	BE101	775500	621984	153516	59228	94289	499659	122325	0.802043	0.197957	0.803331	0.196669
Other	SACE_YBV	775500	640097	135403	50406	84998	508481	131616	0.825399	0.174601	0.794381	0.205619
MosaicsR3	WI016	775500	625497	150003	57674	92330	501213	124284	0.806573	0.193427	0.801304	0.198696
MosaicsR3	ACNOSW	775500	638256	137244	50937	86308	507950	130306	0.823025	0.176975	0.795841	0.204159
MosaicsR3	EM93	775500	634398	141102	53240	87863	505647	128751	0.81805	0.18195	0.79705	0.20295
MosaicsR3	ACBOSW	775500	640361	135139	50089	85051	508798	131563	0.82574	0.17426	0.794549	0.205451
MosaicsR3	ACAOSW	775500	640001	135499	50213	85287	508674	131327	0.825275	0.174725	0.794802	0.205198
MosaicsR3	BRLOSW	775500	601641	173859	80057	93803	478830	122811	0.77581	0.22419	0.795873	0.204127
MosaicsR3	BE018	775500	627345	148155	56952	91204	501935	125410	0.808956	0.191044	0.800094	0.199906
MosaicsR3	SACE_GAV	775500	610237	165263	65364	99900	493523	116714	0.786895	0.213105	0.80874	0.19126
MosaicsR3	YUC5	775500	629755	145745	55463	90283	503424	126331	0.812063	0.187937	0.799397	0.200603
MosaicsR3	L557	775500	614154	161346	63096	98251	495791	118363	0.791946	0.208054	0.807275	0.192725
MosaicsR3	LA002	775500	250780	524720	359790	164931	199097	51683	0.323378	0.676622	0.793911	0.206089
MosaicsR3	ADTOSW	775500	640934	134566	49883	84684	509004	131930	0.826478	0.173522	0.79416	0.20584
Other	SACE_YCG	775500	612436	163064	71162	91903	487725	124711	0.78973	0.21027	0.796369	0.203631
Other	SACE_YAX	775500	612417	163083	66570	96514	492317	120100	0.789706	0.210294	0.803892	0.196108
MexicanAgave	CPROSW	775500	577965	197535	98477	99059	460410	117555	0.74528	0.25472	0.796605	0.203395
MexicanAgave	CPNOSW	775500	632932	142568	53912	88657	504975	127957	0.81616	0.18384	0.797835	0.202165
MexicanAgave	CPIOSW	775500	636503	138997	52416	86582	506471	130032	0.820765	0.179235	0.795709	0.204291
MexicanAgave	CPMOSW	775500	636669	138831	52274	86558	506613	130056	0.820979	0.179021	0.795724	0.204276
MexicanAgave	CPQOSW	775500	597007	178493	82916	95578	475971	121036	0.769835	0.230165	0.797262	0.202738
MexicanAgave	CPLOSW	775500	636930	138570	52116	86455	506771	130159	0.821315	0.178685	0.795646	0.204354
MexicanAgave	CPKOSW	775500	636340	139160	52440	86721	506447	129893	0.820554	0.179446	0.795875	0.204125
SouthAmericaMix2	UFMG_CM_Y456	775500	566840	208660	99603	109058	459284	107556	0.730935	0.269065	0.810253	0.189747
SouthAmericaMix2	CQSOSW	775500	635799	139701	52628	87074	506259	129540	0.819857	0.180143	0.796256	0.203744
SouthAmericaMix2	UFMG_CM_Y642	775500	667387	108113	30137	77977	528750	138637	0.860589	0.139411	0.792269	0.207731
SouthAmericaMix2	UFMG_CM_Y641	775500	671100	104400	28965	75436	529922	141178	0.865377	0.134623	0.789632	0.210368
SouthAmericaMix2	CPAOSW	775500	637485	138015	51979	86037	506908	130577	0.822031	0.177969	0.795169	0.204831
SouthAmericaMix2	BBMOSW	775500	635961	139539	52629	86911	506258	129703	0.820066	0.179934	0.796052	0.203948
SouthAmericaMix2	UFMG_CM_Y263	775500	535159	240341	120750	119592	438137	97022	0.690083	0.309917	0.818704	0.181296
SouthAmericaMix2	SACE_YCL	775500	626835	148665	57333	91333	501554	125281	0.808298	0.191702	0.800137	0.199863
SouthAmericaMix2	ADEOSW	775500	638373	137127	51160	85968	507727	130646	0.823176	0.176824	0.795345	0.204655
SouthAmericaMix2	ALIOSW	775500	631635	143865	55065	88801	503822	127813	0.814487	0.185513	0.797647	0.202353
FrenchGuiana	BMROSW	775500	636575	138925	52274	86652	506613	129962	0.820858	0.179142	0.795842	0.204158
FrenchGuiana	BCKOSW	775500	635193	140307	52840	87468	506047	129146	0.819075	0.180925	0.796682	0.203318
FrenchGuiana	BEBOSW	775500	636761	138739	52137	86603	506750	130011	0.821097	0.178903	0.795824	0.204176
FrenchGuiana	BDQOSW	775500	634561	140939	53056	87884	505831	128730	0.81826	0.18174	0.797135	0.202865
FrenchGuiana	BCBOSW	775500	634678	140822	52993	87830	505894	128784	0.818411	0.181589	0.797088	0.202912
FrenchGuiana	BDSOSW	775500	633736	141764	53307	88458	505580	128156	0.817197	0.182803	0.797777	0.202223
FrenchGuiana	BCPOSW	775500	633738	141762	53369	88394	505518	128220	0.817199	0.182801	0.797677	0.202323
FrenchGuiana	BEEOSW	775500	635187	140313	52702	87612	506185	129002	0.819068	0.180932	0.796907	0.203093
FrenchGuiana	BDTOSW	775500	634735	140765	52932	87834	505955	128780	0.818485	0.181515	0.797112	0.202888
FrenchGuiana	BCMOSW	775500	634192	141308	53345	87964	505542	128650	0.817785	0.182215	0.797143	0.202857
FrenchGuiana	BCGOSW	775500	634824	140676	53089	87588	505798	129026	0.8186	0.1814	0.796753	0.203247
FrenchGuiana	BCHOSW	775500	635330	140170	52680	87491	506207	129123	0.819252	0.180748	0.796762	0.203238
FrenchGuiana	BCFOSW	775500	634426	141074	53077	87998	505810	128616	0.818086	0.181914	0.797272	0.202728
FrenchGuiana	BNCOSW	775500	637170	138330	51931	86400	506956	130214	0.821625	0.178375	0.795637	0.204363
FrenchGuiana	BNDOSW	775500	634634	140866	53030	87837	505857	128777	0.818355	0.181645	0.797085	0.202915
FrenchGuiana	BEAOSW	775500	633321	142179	53635	88545	505252	128069	0.816662	0.183338	0.797782	0.202218
FrenchGuiana	BCNOSW	775500	635509	139991	52585	87407	506302	129207	0.819483	0.180517	0.796687	0.203313
FrenchGuiana	BDROSW	775500	633804	141696	53426	88271	505461	128343	0.817284	0.182716	0.797504	0.202496
FrenchGuiana	BNAOSW	775500	636511	138989	52238	86752	506649	129862	0.820775	0.179225	0.795978	0.204022
FrenchGuiana	BMVOSW	775500	636541	138959	52073	86887	506814	129727	0.820814	0.179186	0.7962	0.2038
FrenchGuiana	BCEOSW	775500	633302	142198	53661	88538	505226	128076	0.816637	0.183363	0.797765	0.202235
FrenchGuiana	BNBOSW	775500	636310	139190	52165	87026	506722	129588	0.820516	0.179484	0.796345	0.203655
FrenchGuiana	BDVOSW	775500	634572	140928	53012	87917	505875	128697	0.818275	0.181725	0.797191	0.202809
FrenchGuiana	BCQOSW	775500	634441	141059	53079	87981	505808	128633	0.818106	0.181894	0.79725	0.20275
FrenchGuiana	BCLOSW	775500	635067	140433	52588	87846	506299	128768	0.818913	0.181087	0.797237	0.202763
FrenchGuiana	BDPOSW	775500	635920	139580	52264	87317	506623	129297	0.820013	0.179987	0.796677	0.203323
FrenchGuiana	BCDOSW	775500	635001	140499	52743	87757	506144	128857	0.818828	0.181172	0.797076	0.202924
FrenchGuiana	BCIOSW	775500	557482	218018	114013	104006	444874	112608	0.718868	0.281132	0.798006	0.201994
FrenchGuiana	BCCOSW	775500	635792	139708	52397	87312	506490	129302	0.819848	0.180152	0.796628	0.203372
FrenchGuiana	BEDOSW	775500	634937	140563	52793	87771	506094	128843	0.818745	0.181255	0.797078	0.202922
FrenchGuiana	BECOSW	775500	578859	196641	97889	98753	460998	117861	0.746433	0.253567	0.796391	0.203609
MosaicsR3	BMQOSW	775500	411309	364191	231942	132250	326945	84364	0.530379	0.469621	0.794889	0.205111
MosaicsR3	L753	775500	636351	139149	52390	86760	506497	129854	0.820569	0.179431	0.79594	0.20406
MosaicsR3	L746	775500	627344	148156	56774	91383	502113	125231	0.808954	0.191046	0.800379	0.199621
MosaicsR3	XJ4	775500	548649	226851	120596	106256	438291	110358	0.707478	0.292522	0.798855	0.201145
MosaicsR3	ALGOSW	775500	638194	137306	51510	85797	507377	130817	0.822945	0.177055	0.79502	0.20498
MosaicsR3	AKQOSW	775500	627535	147965	60074	87892	498813	128722	0.809201	0.190799	0.794877	0.205123
MosaicsR3	SACE_YBZ	775500	638360	137140	51330	85811	507557	130803	0.823159	0.176841	0.795095	0.204905
MosaicsR3	SACE_YDG	775500	626786	148714	56734	91981	502153	124633	0.808235	0.191765	0.801155	0.198845
MosaicsR3	CGBOSW	775500	638003	137497	51352	86146	507535	130468	0.822699	0.177301	0.795506	0.204494
MosaicsR3	SD4	775500	630676	144824	54889	89936	503998	126678	0.813251	0.186749	0.799139	0.200861
CHN-VIII	BJ2	775500	617976	157524	65291	92234	493596	124380	0.796874	0.203126	0.79873	0.20127
CHN-VIII	BJ5	775500	657014	118486	38279	80208	520608	136406	0.847213	0.152787	0.792385	0.207615
CHN-VIII	BJ9	775500	633684	141816	53318	88499	505569	128115	0.81713	0.18287	0.797825	0.202175
CHN-VIII	BJ10	775500	625455	150045	58250	91796	500637	124818	0.806518	0.193482	0.800436	0.199564
CHN-VIII	BJ13	775500	634590	140910	53106	87805	505781	128809	0.818298	0.181702	0.79702	0.20298
CHN-VIII	BJ11	775500	624615	150885	60510	90376	498377	126238	0.805435	0.194565	0.797895	0.202105
Kombucha	KO003	775500	597143	178357	76672	101686	482215	114928	0.77001	0.22999	0.807537	0.192463
Kombucha	KO002	775500	600280	175220	75057	100164	483830	116450	0.774055	0.225945	0.806007	0.193993
Kombucha	KO001	775500	602314	173186	73934	99253	484953	117361	0.776678	0.223322	0.80515	0.19485
MosaicsR3	SACE_YCE	775500	640349	135151	50348	84804	508539	131810	0.825724	0.174276	0.794159	0.205841
MosaicsR3	SACE_YCH	775500	630345	145155	54889	90267	503998	126347	0.812824	0.187176	0.799559	0.200441
MosaicsR3	UFMG_CM_Y637	775500	668374	107126	29451	77676	529436	138938	0.861862	0.138138	0.792125	0.207875
MosaicsR3	CNCOSW	775500	639324	136176	50823	85354	508064	131260	0.824402	0.175598	0.794689	0.205311
MosaicsR3	UFMG_CM_Y639	775500	673836	101664	27646	74019	531241	142595	0.868905	0.131095	0.788383	0.211617
MosaicsR3	UFMG_CM_Y638	775500	677091	98409	26706	71704	532181	144910	0.873103	0.126897	0.785982	0.214018
MosaicsR3	CLGOSW	775500	641101	134399	50011	84389	508876	132225	0.826694	0.173306	0.793753	0.206247
MosaicsR3	SACE_YAT	775500	613535	161965	65862	96104	493025	120510	0.791148	0.208852	0.803581	0.196419
MosaicsR3	ABIOSW	775500	639295	136205	50375	85831	508512	130783	0.824365	0.175635	0.795426	0.204574
MosaicsR3	BSKOSW	775500	639310	136190	51499	84692	507388	131922	0.824384	0.175616	0.793649	0.206351
MosaicsR3	BMDOSW	775500	641359	134141	49930	84212	508957	132402	0.827026	0.172974	0.79356	0.20644
MosaicsR3	SACE_YAV	775500	632029	143471	53971	89501	504916	127113	0.814995	0.185005	0.798881	0.201119
MosaicsR3	ABAOSW	775500	615727	159773	68354	91420	490533	125194	0.793974	0.206026	0.796673	0.203327
MosaicsR3	SACE_YAU	775500	602625	172875	76538	96338	482349	120276	0.777079	0.222921	0.800413	0.199587
MosaicsR3	ABKOSW	775500	638828	136672	50827	85846	508060	130768	0.823763	0.176237	0.7953	0.2047
MosaicsR3	SACE_YAR	775500	634175	141325	53171	88155	505716	128459	0.817763	0.182237	0.797439	0.202561
MosaicsR3	SACE_YAQ	775500	626104	149396	57103	92294	501784	124320	0.807355	0.192645	0.801439	0.198561
MosaicsR3	SACE_YAP	775500	605371	170129	74162	95968	484725	120646	0.78062	0.21938	0.800707	0.199293
MosaicsR3	BRVOSW	775500	640682	134818	50410	84409	508477	132205	0.826153	0.173847	0.79365	0.20635
MosaicsR3	AAVOSW	775500	638549	136951	50943	86009	507944	130605	0.823403	0.176597	0.795466	0.204534
MosaicsR3	SACE_YBT	775500	642819	132681	49212	83470	509675	133144	0.828909	0.171091	0.792875	0.207125
MosaicsR3	SACE_YAK	775500	635011	140489	52879	87611	506008	129003	0.818841	0.181159	0.796849	0.203151
MosaicsR3	ABGOSW	775500	638174	137326	51078	86249	507809	130365	0.822919	0.177081	0.795722	0.204278
MosaicsR3	AATOSW	775500	629656	145844	58019	87826	500868	128788	0.811936	0.188064	0.795463	0.204537
MosaicsR3	AASOSW	775500	638906	136594	50867	85728	508020	130886	0.823863	0.176137	0.79514	0.20486
MosaicsR3	SACE_YAW	775500	620421	155079	60136	94944	498751	121670	0.800027	0.199973	0.803891	0.196109
MosaicsR3	CENOSW	775500	538541	236959	131438	105522	427449	111092	0.694444	0.305556	0.793717	0.206283
MosaicsR3	SACE_YBJ	775500	617513	157987	61871	96117	497016	120497	0.796277	0.203723	0.804867	0.195133
MosaicsR3	SACE_YBL	775500	642677	132823	49465	83359	509422	133255	0.828726	0.171274	0.792656	0.207344
MosaicsR3	SACE_YBK	775500	621592	153908	59255	94654	499632	121960	0.801537	0.198463	0.803794	0.196206
MosaicsR3	ANAOSW	775500	598960	176540	82564	93977	476323	122637	0.772353	0.227647	0.79525	0.20475
MosaicsR3	L716	775500	621463	154037	59974	94064	498913	122550	0.801371	0.198629	0.802804	0.197196
MosaicsR3	CBKOSW	775500	639878	135622	50713	84910	508174	131704	0.825117	0.174883	0.794173	0.205827
MosaicsR3	CBLOSW	775500	639561	135939	50713	85227	508174	131387	0.824708	0.175292	0.794567	0.205433
MosaicsR3	CBMOSW	775500	641227	134273	50067	84207	508820	132407	0.826856	0.173144	0.79351	0.20649
MosaicsR3	LA001	775500	627034	148466	57173	91294	501714	125320	0.808554	0.191446	0.800138	0.199862
MosaicsR3	AKIOSW	775500	599547	175953	81582	94372	477305	122242	0.77311	0.22689	0.796109	0.203891
MosaicsR3	ATEOSW	775500	636029	139471	52409	87063	506478	129551	0.820153	0.179847	0.796313	0.203687
MosaicsR3	ADAOSW	775500	639211	136289	50974	85316	507913	131298	0.824257	0.175743	0.794594	0.205406
Other	JL3	775500	621588	153912	63909	90004	494978	126610	0.801532	0.198468	0.796312	0.203688
Other	JL1	775500	620520	154980	64008	90973	494879	125641	0.800155	0.199845	0.797523	0.202477
WestAfricanCocoa	CQDOSW	775500	640136	135364	50634	84731	508253	131883	0.825449	0.174551	0.793977	0.206023
WestAfricanCocoa	CQCOSW	775500	639573	135927	50780	85148	508107	131466	0.824723	0.175277	0.794447	0.205553
WestAfricanCocoa	WL002	775500	629095	146405	56244	90162	502643	126452	0.811212	0.188788	0.798994	0.201006
WestAfricanCocoa	WL003	775500	630494	145006	55738	89269	503149	127345	0.813016	0.186984	0.798023	0.201977
WestAfricanCocoa	CQIOSW	775500	640441	135059	50481	84579	508406	132035	0.825843	0.174157	0.793837	0.206163
WestAfricanCocoa	WL001	775500	628626	146874	56468	90407	502419	126207	0.810607	0.189393	0.799234	0.200766
WestAfricanCocoa	CQGOSW	775500	639767	135733	50765	84969	508122	131645	0.824974	0.175026	0.79423	0.20577
WestAfricanCocoa	CQPOSW	775500	640327	135173	50398	84776	508489	131838	0.825696	0.174304	0.794108	0.205892
WestAfricanCocoa	CQLOSW	775500	639300	136200	50824	85377	508063	131237	0.824371	0.175629	0.794718	0.205282
WestAfricanCocoa	CQHOSW	775500	640128	135372	50505	84868	508382	131746	0.825439	0.174561	0.794188	0.205812
WestAfricanCocoa	CQMOSW	775500	640488	135012	50304	84709	508583	131905	0.825903	0.174097	0.794055	0.205945
WestAfricanCocoa	ANNOSW	775500	640464	135036	50062	84975	508825	131639	0.825872	0.174128	0.794463	0.205537
WestAfricanCocoa	CQEOSW	775500	639409	136091	50897	85195	507990	131419	0.824512	0.175488	0.794468	0.205532
WestAfricanCocoa	CQKOSW	775500	640518	134982	50404	84579	508483	132035	0.825942	0.174058	0.793862	0.206138
WestAfricanCocoa	CQNOSW	775500	639028	136472	50951	85522	507936	131092	0.824021	0.175979	0.794857	0.205143
WestAfricanCocoa	CQFOSW	775500	640161	135339	50696	84644	508191	131970	0.825482	0.174518	0.793849	0.206151
MosaicsR3	UFMG_CM_Y628	775500	671682	103818	29560	74259	529327	142355	0.866128	0.133872	0.788062	0.211938
MosaicsR3	ADKOSW	775500	616357	159143	68839	90305	490048	126309	0.794787	0.205213	0.795072	0.204928
MosaicsR3	CKAOSW	775500	638375	137125	51314	85812	507573	130802	0.823179	0.176821	0.795102	0.204898
MosaicsR3	SACE_MAB	775500	473088	302412	170107	132306	388780	84308	0.610043	0.389957	0.821792	0.178208
MosaicsR3	L742	775500	620189	155311	60894	94418	497993	122196	0.799728	0.200272	0.80297	0.19703
MosaicsR3	SACE_YDH	775500	591497	184003	87829	96175	471058	120439	0.76273	0.23727	0.796383	0.203617
MosaicsR3	AGPOSW	775500	618483	157017	67973	89045	490914	127569	0.797528	0.202472	0.793739	0.206261
MosaicsR3	CHTOSW	775500	640406	135094	50618	84477	508269	132137	0.825798	0.174202	0.793667	0.206333
MosaicsR3	CHSOSW	775500	610566	164934	74114	90821	484773	125793	0.787319	0.212681	0.793973	0.206027
MosaicsR3	ATDOSW	775500	634560	140940	53120	87821	505767	128793	0.818259	0.181741	0.797036	0.202964
MosaicsR3	ATCOSW	775500	579145	196355	98335	98021	460552	118593	0.746802	0.253198	0.795227	0.204773
MosaicsR3	ABDOSW	775500	586387	189113	89960	99154	468927	117460	0.756141	0.243859	0.799689	0.200311
MosaicsR3	L758	775500	621149	154351	60140	94212	498747	122402	0.800966	0.199034	0.802943	0.197057
Mantou-3	GS6	775500	550841	224659	120871	103789	438016	112825	0.710304	0.289696	0.795177	0.204823
Mantou-3	GS5_6	775500	523518	251982	145685	106298	413202	110316	0.675072	0.324928	0.789279	0.210721
Mantou-3	GS1	775500	560630	214870	113573	101298	445314	115316	0.722927	0.277073	0.79431	0.20569
Mantou-3	SXJM9_5	775500	632362	143138	54049	89090	504838	127524	0.815425	0.184575	0.798337	0.201663
Mantou-3	JM14_3	775500	632825	142675	53772	88904	505115	127710	0.816022	0.183978	0.798191	0.201809
Mantou-3	QH7_3	775500	633322	142178	54383	87796	504504	128818	0.816663	0.183337	0.7966	0.2034
Mantou-3	JM22_1	775500	637827	137673	51395	86279	507492	130335	0.822472	0.177528	0.795658	0.204342
Mantou-3	JM37_2	775500	633623	141877	53499	88379	505388	128235	0.817051	0.182949	0.797616	0.202384
Mantou-3	ANGGW_1	775500	617235	158265	66708	91558	492179	125056	0.795919	0.204081	0.797393	0.202607
Mantou-3	WL4	775500	566657	208843	110406	98438	448481	118176	0.730699	0.269301	0.791451	0.208549
Mantou-3	WL2	775500	515649	259851	148734	111118	410153	105496	0.664925	0.335075	0.795411	0.204589
Mantou-3	WL1	775500	583950	191550	94110	97441	464777	119173	0.752998	0.247002	0.795919	0.204081
Mantou-3	NX7_1	775500	634848	140652	52707	87946	506180	128668	0.818631	0.181369	0.797325	0.202675
Mantou-3	JM8_3	775500	596604	178896	84215	94682	474672	121932	0.769315	0.230685	0.795623	0.204377
Mantou-3	GS5_7	775500	577858	197642	99483	98160	459404	118454	0.745142	0.254858	0.795012	0.204988
Mantou-3	SXJM1_1	775500	636430	139070	52223	86848	506664	129766	0.820671	0.179329	0.796103	0.203897
Mantou-3	JM4_8	775500	636186	139314	52140	87175	506747	129439	0.820356	0.179644	0.796539	0.203461
Mantou-3	JM13_2	775500	637206	138294	51551	86744	507336	129870	0.821671	0.178329	0.796188	0.203812
Mantou-3	CJM20_1	775500	578373	197127	98552	98576	460335	118038	0.745807	0.254193	0.795914	0.204086
Mantou-3	CJM6_2	775500	605235	170265	76904	93362	481983	123252	0.780445	0.219555	0.796357	0.203643
Mantou-3	DJM4_1	775500	613698	161802	70397	91406	488490	125208	0.791358	0.208642	0.795978	0.204022
Mantou-3	CJM11_1	775500	594481	181019	85880	95140	473007	121474	0.766578	0.233422	0.795664	0.204336
MosaicsR3	BMFOSW	775500	594676	180824	87151	93674	471736	122940	0.766829	0.233171	0.793266	0.206734
MosaicsR3	WL010	775500	602631	172869	73655	99215	485232	117399	0.777087	0.222913	0.805189	0.194811
MosaicsR3	CPCOSW	775500	639463	136037	50941	85097	507946	131517	0.824582	0.175418	0.794332	0.205668
MosaicsR3	CKNOSW	775500	639649	135851	50774	85078	508113	131536	0.824821	0.175179	0.794362	0.205638
MosaicsR3	CILOSW	775500	638925	136575	51129	85447	507758	131167	0.823888	0.176112	0.794707	0.205293
MosaicsR3	CIGOSW	775500	641272	134228	49868	84361	509019	132253	0.826914	0.173086	0.793765	0.206235
MosaicsR3	CIKOSW	775500	601166	174334	80537	93798	478350	122816	0.775198	0.224802	0.795704	0.204296
MosaicsR3	CIIOSW	775500	596961	178539	83184	95356	475703	121258	0.769776	0.230224	0.796875	0.203125
MosaicsR3	AHAOSW	775500	638896	136604	50980	85625	507907	130989	0.82385	0.17615	0.794976	0.205024
MosaicsR3	AAGOSW	775500	600442	175058	80841	94218	478046	122396	0.774264	0.225736	0.796157	0.203843
MosaicsR3	BTAOSW	775500	640395	135105	50489	84617	508398	131997	0.825783	0.174217	0.793882	0.206118
MosaicsR3	L708	775500	567839	207661	91573	116089	467314	100525	0.732223	0.267777	0.822969	0.177031
MosaicsR3	ATBOSW	775500	637743	137757	51557	86201	507330	130413	0.822364	0.177636	0.795509	0.204491
Mantou-1	BT3	775500	511623	263877	153207	110671	405680	105943	0.659733	0.340267	0.792928	0.207072
Mantou-1	WL3	775500	410333	365167	235102	130066	323785	86548	0.529121	0.470879	0.789079	0.210921
Mantou-1	BT1_1	775500	602864	172636	82070	90567	476817	126047	0.777387	0.222613	0.79092	0.20908
Mantou-1	BT4	775500	590039	185461	89874	95588	469013	121026	0.76085	0.23915	0.794885	0.205115
Mantou-1	BT2_8	775500	579698	195802	97608	98195	461279	118419	0.747515	0.252485	0.795723	0.204277
Mantou-1	BT2_6	775500	617013	158487	68367	90121	490520	126493	0.795632	0.204368	0.794991	0.205009
MosaicsR3	ALROSW	775500	639010	136490	51021	85470	507866	131144	0.823997	0.176003	0.79477	0.20523
MosaicsR3	XJ2	775500	624946	150554	58484	92071	500403	124543	0.805862	0.194138	0.800714	0.199286
MosaicsR3	DBS12	775500	608167	167333	63845	103489	495042	113125	0.784226	0.215774	0.81399	0.18601
MosaicsR3	AELOSW	775500	580826	194674	97627	97048	461260	119566	0.74897	0.25103	0.794145	0.205855
MosaicsR3	BTBOSW	775500	639366	136134	50951	85184	507936	131430	0.824456	0.175544	0.794437	0.205563
MosaicsR3	ARBOSW	775500	639536	135964	50933	85032	507954	131582	0.824676	0.175324	0.794254	0.205746
MosaicsR3	ARAOSW	775500	636683	138817	52782	86036	506105	130578	0.820997	0.179003	0.794909	0.205091
MosaicsR3	AEEOSW	775500	638399	137101	51394	85708	507493	130906	0.82321	0.17679	0.794946	0.205054
MosaicsR3	CHQOSW	775500	641385	134115	50046	84070	508841	132544	0.82706	0.17294	0.793347	0.206653
MosaicsR3	CIHOSW	775500	601550	173950	80778	93173	478109	123441	0.775693	0.224307	0.794795	0.205205
MosaicsR3	BPAOSW	775500	642158	133342	49653	83690	509234	132924	0.828057	0.171943	0.793004	0.206996
MosaicsR3	BIEOSW	775500	640475	135025	50376	84650	508511	131964	0.825887	0.174113	0.793959	0.206041
MosaicsR3	XJ7_3	775500	630271	145229	54225	91005	504662	125609	0.812729	0.187271	0.800706	0.199294
MosaicsR3	CICOSW	775500	639132	136368	51080	85289	507807	131325	0.824155	0.175845	0.794526	0.205474
MosaicsR3	GS3_1	775500	507824	267676	156061	111616	402826	104998	0.654834	0.345166	0.793239	0.206761
MosaicsR3	NX8_3	775500	632048	143452	54223	89230	504664	127384	0.81502	0.18498	0.798458	0.201542
MosaicsR3	SACE_YBU	775500	642270	133230	49430	83801	509457	132813	0.828201	0.171799	0.793213	0.206787
MosaicsR3	AFGOSW	775500	645280	130220	48142	82079	510745	134535	0.832083	0.167917	0.791509	0.208491
MosaicsR3	AEIOSW	775500	638995	136505	51222	85284	507665	131330	0.823978	0.176022	0.794474	0.205526
MosaicsR3	CIFOSW	775500	637885	137615	51596	86020	507291	130594	0.822547	0.177453	0.79527	0.20473
MosaicsR3	CEMOSW	775500	638501	136999	51226	85774	507661	130840	0.823341	0.176659	0.795083	0.204917
MosaicsR3	CDKOSW	775500	638296	137204	51142	86063	507745	130551	0.823077	0.176923	0.79547	0.20453
Mantou-2	LJM21_3	775500	657240	118260	38461	79800	520426	136814	0.847505	0.152495	0.791836	0.208164
Mantou-2	HN1_9	775500	633766	141734	53059	88676	505828	127938	0.817235	0.182765	0.798131	0.201869
Mantou-2	LJM6A_4	775500	627428	148072	59398	88675	499489	127939	0.809063	0.190937	0.79609	0.20391
Mantou-2	LJM6A_1	775500	584093	191407	97354	94054	461533	122560	0.753182	0.246818	0.79017	0.20983
Mantou-2	LJM21_9	775500	647810	127690	46061	81630	512826	134984	0.835345	0.164655	0.79163	0.20837
Mantou-2	LJM21_10	775500	633886	141614	53106	88509	505781	128105	0.81739	0.18261	0.797905	0.202095
Mantou-2	CJM21_4	775500	610583	164917	72293	92625	486594	123989	0.787341	0.212659	0.796933	0.203067
Mantou-2	WJZ1_2	775500	606771	168729	78808	89922	480079	126692	0.782426	0.217574	0.791203	0.208797
Mantou-2	WJM5_2	775500	511001	264499	153246	111254	405641	105360	0.658931	0.341069	0.793816	0.206184
Mantou-2	CJM25_4	775500	609722	165778	73429	92350	485458	124264	0.786231	0.213769	0.796196	0.203804
Mantou-2	CJM25_5	775500	625277	150223	59986	90238	498901	126376	0.806289	0.193711	0.797888	0.202112
Mantou-2	CJM25_1	775500	599070	176430	84977	91454	473910	125160	0.772495	0.227505	0.791076	0.208924
Mantou-2	LJM21_1	775500	630695	144805	55521	89285	503366	127329	0.813275	0.186725	0.798113	0.201887
Mantou-2	CJM19_6	775500	595628	179872	84986	94887	473901	121727	0.768057	0.231943	0.795633	0.204367
Mantou-2	CJM19_5	775500	598133	177367	85449	91919	473438	124695	0.771287	0.228713	0.791526	0.208474
MosaicsR3	CIDOSW	775500	638461	137039	51240	85800	507647	130814	0.823289	0.176711	0.79511	0.20489
MosaicsR3	CMGOSW	775500	642417	133083	49158	83926	509729	132688	0.828391	0.171609	0.793455	0.206545
MosaicsR3	DBS11	775500	598096	177404	70921	106484	487966	110130	0.771239	0.228761	0.815866	0.184134
MosaicsR3	BBTOSW	775500	639960	135540	50559	84982	508328	131632	0.825222	0.174778	0.794312	0.205688
MosaicsR3	CHPOSW	775500	639463	136037	50961	85077	507926	131537	0.824582	0.175418	0.794301	0.205699
MosaicsR3	CHNOSW	775500	639646	135854	50882	84973	508005	131641	0.824818	0.175182	0.794197	0.205803
MosaicsR3	CREOSW	775500	639668	135832	51006	84827	507881	131787	0.824846	0.175154	0.793976	0.206024
Mantou-5	QH7_2	775500	635396	140104	52693	87412	506194	129202	0.819337	0.180663	0.796659	0.203341
Mantou-5	QH7_4	775500	636773	138727	52073	86655	506814	129959	0.821113	0.178887	0.79591	0.20409
Mantou-5	QH6_5	775500	657727	117773	38501	79273	520386	137341	0.848133	0.151867	0.791188	0.208812
mosaics	NX8_1	775500	588971	186529	89412	97118	469475	119496	0.759473	0.240527	0.797111	0.202889
Mantou-4	QH3_1	775500	658292	117208	38314	78895	520573	137719	0.848861	0.151139	0.790793	0.209207
Mantou-4	QH2_1	775500	592029	183471	87461	96011	471426	120603	0.763416	0.236584	0.796289	0.203711
Mantou-4	QH1_1	775500	628806	146694	55854	90841	503033	125773	0.810839	0.189161	0.799981	0.200019
Mantou-6	TY2_1	775500	609512	165988	73324	92665	485563	123949	0.78596	0.21404	0.796642	0.203358
Mantou-6	TY1_4	775500	528896	246604	137925	108680	420962	107934	0.682006	0.317994	0.795926	0.204074
Mantou-6	TY1_5	775500	459362	316138	192140	123999	366747	92615	0.592343	0.407657	0.798383	0.201617
Mantou-6	TY3_9	775500	556029	219471	117154	102318	441733	114296	0.716994	0.283006	0.794442	0.205558
Mantou-6	JQ9_4	775500	656894	118606	38029	80578	520858	136036	0.847059	0.152941	0.79291	0.20709
Mantou-6	HN5_1	775500	563336	212164	111156	101009	447731	115605	0.726417	0.273583	0.794785	0.205215
Other	CGHOSW	775500	639049	136451	51144	85308	507743	131306	0.824048	0.175952	0.794529	0.205471
Other	ASMOSW	775500	638690	136810	51392	85419	507495	131195	0.823585	0.176415	0.794587	0.205413
Other	XZ4_2	775500	657116	118384	38721	79664	520166	136950	0.847345	0.152655	0.791589	0.208411
Other	XZ4_1	775500	638877	136623	50998	85626	507889	130988	0.823826	0.176174	0.794971	0.205029
Other	XZ7	775500	632497	143003	53812	89192	505075	127422	0.815599	0.184401	0.798541	0.201459
Other	XZ3_1	775500	631161	144339	54263	90077	504624	126537	0.813876	0.186124	0.799517	0.200483
Other	XZ2_1	775500	634255	141245	52925	88321	505962	128293	0.817866	0.182134	0.797726	0.202274
Other	XZ10_1	775500	638146	137354	51282	86073	507605	130541	0.822883	0.177117	0.795437	0.204563
Other	NX4_1	775500	647925	127575	42681	84895	516206	131719	0.835493	0.164507	0.796706	0.203294
Other	SXJM6_6	775500	657112	118388	38402	79987	520485	136627	0.84734	0.15266	0.79208	0.20792
Other	HN2_2	775500	633045	142455	54413	88043	504474	128571	0.816306	0.183694	0.796901	0.203099
Other	BM5_1	775500	630833	144667	56360	88308	502527	128306	0.813453	0.186547	0.796609	0.203391
Other	YM3_1	775500	634271	141229	53171	88059	505716	128555	0.817887	0.182113	0.797318	0.202682
Other	JM28_2	775500	638105	137395	51348	86048	507539	130566	0.82283	0.17717	0.795385	0.204615
Other	JM28_13	775500	651848	123652	40533	83120	518354	133494	0.840552	0.159448	0.795207	0.204793
Other	JT49_4	775500	621984	153516	67597	85920	491290	130694	0.802043	0.197957	0.789876	0.210124
Other	JL2	775500	630295	145205	55477	89729	503410	126885	0.81276	0.18724	0.79869	0.20131
Other	CEPOSW	775500	609418	166082	74516	91567	484371	125047	0.785839	0.214161	0.794809	0.205191
Other	CKROSW	775500	639148	136352	51130	85223	507757	131391	0.824175	0.175825	0.794428	0.205572
Other	JQ9_3	775500	624335	151165	57473	93693	501414	122921	0.805074	0.194926	0.803117	0.196883
Other	GZLJ3_1	775500	630644	144856	56362	88495	502525	128119	0.81321	0.18679	0.796844	0.203156
Baijiu	GZLJ3_30	775500	547164	228336	123106	105231	435781	111383	0.705563	0.294437	0.796436	0.203564
Baijiu	GZLJ3_22	775500	587994	187506	90993	96514	467894	120100	0.758213	0.241787	0.795746	0.204254
Baijiu	MTZ13_12	775500	646473	129027	43530	85498	515357	131116	0.833621	0.166379	0.797183	0.202817
Baijiu	HZJZ4_5	775500	655767	119733	39330	80404	519557	136210	0.845605	0.154395	0.792289	0.207711
Baijiu	HZJZ5_5	775500	656279	119221	39043	80179	519844	136435	0.846266	0.153734	0.792108	0.207892
Baijiu	HZJZ5_4	775500	656946	118554	38965	79590	519922	137024	0.847126	0.152874	0.791423	0.208577
Baijiu	MTJZ3	775500	548109	227391	122447	104945	436440	111669	0.706781	0.293219	0.796265	0.203735
Baijiu	GZLJ3_19	775500	635495	140005	52590	87416	506297	129198	0.819465	0.180535	0.796697	0.203303
Baijiu	HLJ225	775500	630858	144642	54834	89809	504053	126805	0.813485	0.186515	0.798996	0.201004
Baijiu	HLJ59	775500	636297	139203	52176	87028	506711	129586	0.820499	0.179501	0.796344	0.203656
Baijiu	HLJ201	775500	654779	120721	38841	81881	520046	134733	0.844331	0.155669	0.794231	0.205769
Baijiu	HLJ4	775500	655710	119790	39818	79973	519069	136641	0.845532	0.154468	0.791614	0.208386
Baijiu	HLJ167	775500	657039	118461	39132	79330	519755	137284	0.847246	0.152754	0.791057	0.208943
Baijiu	HLJ10	775500	658641	116859	38085	78775	520802	137839	0.849311	0.150689	0.790722	0.209278
Sake-B	NRRL_Y_11572	775500	657839	117661	35898	81764	522989	134850	0.848277	0.151723	0.795011	0.204989
Sake-B	L719	775500	601172	174328	70984	103345	487903	113269	0.775206	0.224794	0.811586	0.188414
Sake-B	CMDOSW	775500	599885	175615	81417	94199	477470	122415	0.773546	0.226454	0.795936	0.204064
Sake-B	APCOSW	775500	638187	137313	51437	85877	507450	130737	0.822936	0.177064	0.795143	0.204857
Sake-B	AVCOSW	775500	547165	228335	124886	103450	434001	113164	0.705564	0.294436	0.793181	0.206819
Sake-B	APDOSW	775500	615710	159790	69399	90392	489488	126222	0.793952	0.206048	0.794998	0.205002
Sake-B	CMMOSW	775500	619045	156455	65269	91187	493618	125427	0.798253	0.201747	0.797386	0.202614
Sake-B	AVLOSW	775500	621620	153880	64169	89712	494718	126902	0.801573	0.198427	0.795853	0.204147
Sake-B	CMBOSW	775500	601621	173879	80194	93686	478693	122928	0.775785	0.224215	0.795672	0.204328
Sake-B	CLVOSW	775500	599326	176174	81985	94190	476902	122424	0.772825	0.227175	0.795731	0.204269
Sake-B	CLKOSW	775500	616603	158897	69216	89682	489671	126932	0.795104	0.204896	0.794143	0.205857
Sake-B	CQROSW	775500	622910	152590	63611	88980	495276	127634	0.803237	0.196763	0.7951	0.2049
Sake-B	CQQOSW	775500	622875	152625	63512	89114	495375	127500	0.803191	0.196809	0.795304	0.204696
Sake-B	CLPOSW	775500	638273	137227	51464	85764	507423	130850	0.823047	0.176953	0.794994	0.205006
Sake-B	APFOSW	775500	637186	138314	51910	86405	506977	130209	0.821645	0.178355	0.79565	0.20435
Sake-B	AVMOSW	775500	584548	190952	93438	97515	465449	119099	0.753769	0.246231	0.796255	0.203745
Sake-B	AVDOSW	775500	585967	189533	92837	96697	466050	119917	0.755599	0.244401	0.795352	0.204648
Sake-B	APEOSW	775500	584877	190623	93207	97417	465680	119197	0.754193	0.245807	0.796202	0.203798
Sake-B	CMLOSW	775500	634428	141072	53128	87945	505759	128669	0.818089	0.181911	0.797189	0.202811
Sake-B	CLROSW	775500	636938	138562	52137	86426	506750	130188	0.821326	0.178674	0.795603	0.204397
Sake-B	CLLOSW	775500	636493	139007	52349	86659	506538	129955	0.820752	0.179248	0.795827	0.204173
Sake-B	CMCOSW	775500	594234	181266	86368	94899	472519	121715	0.766259	0.233741	0.795173	0.204827
Sake-B	CLTOSW	775500	615835	159665	69281	90385	489606	126229	0.794113	0.205887	0.795028	0.204972
Sake-B	CMEOSW	775500	617585	157915	68268	89648	490619	126966	0.79637	0.20363	0.794415	0.205585
Sake-B	CLSOSW	775500	633551	141949	54631	87319	504256	129295	0.816958	0.183042	0.79592	0.20408
Sake-A	TUM184	775500	673709	101791	28066	73726	530821	142888	0.868741	0.131259	0.787908	0.212092
Sake-A	ARPOSW	775500	436488	339012	212026	126987	346861	89627	0.562847	0.437153	0.794663	0.205337
Sake-A	AEFOSW	775500	638953	136547	51045	85503	507842	131111	0.823924	0.176076	0.794803	0.205197
Sake-A	ARMOSW	775500	636388	139112	52428	86685	506459	129929	0.820616	0.179384	0.795834	0.204166
Sake-A	CMHOSW	775500	640033	135467	50187	85281	508700	131333	0.825317	0.174683	0.794803	0.205197
Sake-A	CMKOSW	775500	639795	135705	50480	85226	508407	131388	0.82501	0.17499	0.79464	0.20536
Sake-A	CLIOSW	775500	638534	136966	51243	85724	507644	130890	0.823384	0.176616	0.795015	0.204985
Sake-A	SA001	775500	596177	179323	81212	98112	477675	118502	0.768765	0.231235	0.80123	0.19877
Sake-A	ANSOSW	775500	624674	150826	61913	88914	496974	127700	0.805511	0.194489	0.795573	0.204427
Sake-A	AADOSW	775500	607898	167602	75182	92421	483705	124193	0.783879	0.216121	0.795701	0.204299
Sake-A	CBS1598	775500	667117	108383	30880	77504	528007	139110	0.860241	0.139759	0.791476	0.208524
Sake-A	CMNOSW	775500	636109	139391	52292	87100	506595	129514	0.820257	0.179743	0.796397	0.203603
Sake-A	CLMOSW	775500	624523	150977	62780	88198	496107	128416	0.805317	0.194683	0.794377	0.205623
Sake-A	CBS435	775500	677797	97703	26894	70810	531993	145804	0.874013	0.125987	0.784885	0.215115
Sake-A	SA006	775500	627775	147725	56567	91159	502320	125455	0.80951	0.19049	0.800159	0.199841
Sake-A	AQNOSW	775500	635702	139798	52510	87289	506377	129325	0.819732	0.180268	0.796563	0.203437
Sake-A	SA007	775500	592274	183226	85248	97979	473639	118635	0.763732	0.236268	0.799696	0.200304
Sake-A	CLQOSW	775500	629130	146370	58498	87873	500389	128741	0.811257	0.188743	0.795367	0.204633
Sake-A	CLNOSW	775500	637310	138190	51828	86363	507059	130251	0.821805	0.178195	0.795624	0.204376
Sake-A	SA004	775500	633685	141815	53330	88486	505557	128128	0.817131	0.182869	0.797805	0.202195
Sake-A	AFNOSW	775500	640320	135180	50256	84925	508631	131689	0.825687	0.174313	0.794339	0.205661
Sake-A	SA005	775500	624744	150756	58420	92337	500467	124277	0.805602	0.194398	0.801075	0.198925
Sake-A	ADQOSW	775500	638785	136715	51178	85538	507709	131076	0.823707	0.176293	0.794804	0.205196
Sake-A	AFMOSW	775500	644753	130747	48482	82266	510405	134348	0.831403	0.168597	0.791629	0.208371
Sake-A	BTSOSW	775500	603104	172396	79729	92668	479158	123946	0.777697	0.222303	0.794487	0.205513
Sake-A	APAOSW	775500	636532	138968	52215	86754	506672	129860	0.820802	0.179198	0.795988	0.204012
Sake-A	CMIOSW	775500	638697	136803	50839	85965	508048	130649	0.823594	0.176406	0.795444	0.204556
Sake-A	ADNOSW	775500	639275	136225	50726	85500	508161	131114	0.824339	0.175661	0.794902	0.205098
Sake-A	CMFOSW	775500	608838	166662	74114	92549	484773	124065	0.785091	0.214909	0.796227	0.203773
Sake-A	ANROSW	775500	637174	138326	51814	86513	507073	130101	0.82163	0.17837	0.795816	0.204184
Sake-A	ANVOSW	775500	608448	167052	75054	91999	483833	124615	0.784588	0.215412	0.795192	0.204808
Sake-A	ANTOSW	775500	608439	167061	74986	92076	483901	124538	0.784576	0.215424	0.795316	0.204684
Mantou7	AHQOSW	775500	639312	136188	50826	85363	508061	131251	0.824387	0.175613	0.7947	0.2053
Mantou7	BJ1	775500	631763	143737	54427	89311	504460	127303	0.814652	0.185348	0.798496	0.201504
Mantou7	CGLOSW	775500	637857	137643	51606	86038	507281	130576	0.822511	0.177489	0.79529	0.20471
Mantou7	HQ3_1	775500	632984	142516	54349	88168	504538	128446	0.816227	0.183773	0.797079	0.202921
Mantou7	HQ1_1	775500	633908	141592	53348	88245	505539	128369	0.817418	0.182582	0.797496	0.202504
Mantou7	CEVOSW	775500	647239	128261	47076	81186	511811	135428	0.834609	0.165391	0.79076	0.20924
Mantou7	AEPOSW	775500	640069	135431	50503	84929	508384	131685	0.825363	0.174637	0.794264	0.205736
Mantou7	AGGOSW	775500	635114	140386	52967	87420	505920	129194	0.818974	0.181026	0.796581	0.203419
Mantou7	AFHOSW	775500	643732	131768	48772	82997	510115	133617	0.830086	0.169914	0.792434	0.207566
Mantou7	JZ10_1	775500	633835	141665	53093	88573	505794	128041	0.817324	0.182676	0.79799	0.20201
Mantou7	LJQ13_C7	775500	627129	148371	56226	92146	502661	124468	0.808677	0.191323	0.801527	0.198473
Mantou7	LJQ13C_1	775500	626488	149012	56329	92684	502558	123930	0.80785	0.19215	0.802183	0.197817
Mantou7	LJQ13A_5	775500	645885	129615	45454	84162	513433	132452	0.832863	0.167137	0.794929	0.205071
Mantou7	LJQ131_6	775500	609980	165520	71484	94037	487403	122577	0.786564	0.213436	0.799048	0.200952
Mantou7	MTJZ4	775500	605325	170175	75917	94259	482970	122355	0.780561	0.219439	0.797869	0.202131
Mantou7	LJZ22_1	775500	629922	145578	55545	90034	503342	126580	0.812279	0.187721	0.799054	0.200946
Mantou7	JT49_3	775500	656403	119097	39024	80074	519863	136540	0.846426	0.153574	0.791988	0.208012
Mantou7	JT49_1	775500	657010	118490	38506	79985	520381	136629	0.847208	0.152792	0.792044	0.207956
Mantou7	JT10_10	775500	646879	128621	44333	84289	514554	132325	0.834144	0.165856	0.795441	0.204559
Mantou7	JQ8_4	775500	652840	122660	39900	82761	518987	133853	0.841831	0.158169	0.794968	0.205032
Mantou7	JT43_1	775500	631124	144376	54923	89454	503964	127160	0.813828	0.186172	0.798518	0.201482
Mantou7	JT21_3	775500	624182	151318	57408	93911	501479	122703	0.804877	0.195123	0.803418	0.196582
Mantou7	JT21_1	775500	632256	143244	54158	89087	504729	127527	0.815288	0.184712	0.798298	0.201702
Mantou7	JQHG_1	775500	596342	179158	82455	96704	476432	119910	0.768977	0.231023	0.798924	0.201076
Mantou7	JTHB1	775500	634698	140802	53078	87725	505809	128889	0.818437	0.181563	0.796929	0.203071
Mantou7	HN6_1	775500	623108	152392	61224	91169	497663	125445	0.803492	0.196508	0.798679	0.201321
Mantou7	JT94_11	775500	633374	142126	53240	88887	505647	127727	0.81673	0.18327	0.798339	0.201661
Mantou7	JM28_16	775500	622895	152605	58577	94029	500310	122585	0.803217	0.196783	0.803201	0.196799
Mantou7	JQ8_3	775500	631714	143786	54250	89537	504637	127077	0.814589	0.185411	0.798838	0.201162
Mantou7	155	775500	631521	143979	54560	89420	504327	127194	0.81434	0.18566	0.798591	0.201409
Mantou7	CJM24_1	775500	655292	120208	39047	81162	519840	135452	0.844993	0.155007	0.793295	0.206705
Mantou7	229	775500	657566	117934	38247	79688	520640	136926	0.847925	0.152075	0.791768	0.208232
Mantou7	427	775500	635563	139937	52526	87412	506361	129202	0.819553	0.180447	0.796713	0.203287
Mantou7	502	775500	636546	138954	51953	87002	506934	129612	0.82082	0.17918	0.796382	0.203618
Mantou7	168	775500	636060	139440	52154	87287	506733	129327	0.820193	0.179807	0.796675	0.203325
AsianFermentation	CQJZ1_4	775500	618001	157499	60724	96776	498163	119838	0.796907	0.203093	0.806088	0.193912
AsianFermentation	2_1392	775500	634435	141065	52989	88077	505898	128537	0.818098	0.181902	0.797399	0.202601
AsianFermentation	CGIOSW	775500	639500	136000	50893	85108	507994	131506	0.824629	0.175371	0.794361	0.205639
AsianFermentation	CGROSW	775500	638521	136979	51153	85827	507734	130787	0.823367	0.176633	0.795172	0.204828
AsianFermentation	CGGOSW	775500	639152	136348	51034	85315	507853	131299	0.824181	0.175819	0.794573	0.205427
AsianFermentation	CGPOSW	775500	638494	137006	51333	85674	507554	130940	0.823332	0.176668	0.794924	0.205076
AsianFermentation	CGNOSW	775500	638459	137041	51391	85651	507496	130963	0.823287	0.176713	0.794876	0.205124
AsianFermentation	BEHOSW	775500	637372	138128	51761	86368	507126	130246	0.821885	0.178115	0.795652	0.204348
AsianFermentation	AQSOSW	775500	627487	148013	59382	88632	499505	127982	0.809139	0.190861	0.79604	0.20396
AsianFermentation	2_591	775500	612285	163215	70501	92715	488386	123899	0.789536	0.210464	0.797645	0.202355
AsianFermentation	AKLOSW	775500	638539	136961	51179	85783	507708	130831	0.82339	0.17661	0.795109	0.204891
AsianFermentation	ACMOSW	775500	638840	136660	50661	86000	508226	130614	0.823778	0.176222	0.795545	0.204455
AsianFermentation	SACE_YDA	775500	629567	145933	58179	87755	500708	128859	0.811821	0.188179	0.795321	0.204679
AsianFermentation	L757	775500	618867	156633	60749	95885	498138	120729	0.798023	0.201977	0.804919	0.195081
AsianFermentation	ABBOSW	775500	637727	137773	51390	86384	507497	130230	0.822343	0.177657	0.79579	0.20421
AsianFermentation	ADHOSW	775500	640771	134729	50032	84698	508855	131916	0.826268	0.173732	0.794129	0.205871
AsianFermentation	ACKOSW	775500	639360	136140	50644	85497	508243	131117	0.824449	0.175551	0.794925	0.205075
AsianFermentation	BEFOSW	775500	637848	137652	51470	86183	507417	130431	0.822499	0.177501	0.795514	0.204486
AsianFermentation	TUM380	775500	672662	102838	28322	74517	530565	142097	0.867391	0.132609	0.788754	0.211246
AsianFermentation	TUM127	775500	670338	105162	28932	76231	529955	140383	0.864395	0.135605	0.790579	0.209421
AsianFermentation	BHSOSW	775500	636980	138520	51905	86616	506982	129998	0.82138	0.17862	0.795915	0.204085
AsianFermentation	BHQOSW	775500	638133	137367	51414	85954	507473	130660	0.822867	0.177133	0.795246	0.204754
AsianFermentation	BHROSW	775500	638220	137280	51304	85977	507583	130637	0.822979	0.177021	0.79531	0.20469
AsianFermentation	BHPOSW	775500	637693	137807	51649	86159	507238	130455	0.822299	0.177701	0.795427	0.204573
AsianFermentation	SACE_YCJ	775500	639898	135602	50717	84886	508170	131728	0.825142	0.174858	0.794142	0.205858
AsianFermentation	JM32_8	775500	650659	124841	40531	84311	518356	132303	0.839019	0.160981	0.796663	0.203337
AsianFermentation	JM32_3	775500	629733	145767	55324	90444	503563	126170	0.812035	0.187965	0.799645	0.200355
AsianFermentation	SACE_YDK	775500	509268	266232	150489	115744	408398	100870	0.656696	0.343304	0.801931	0.198069
AsianFermentation	SACE_YCK	775500	610464	165036	68829	96208	490058	120406	0.787188	0.212812	0.802763	0.197237
AsianFermentation	CELOSW	775500	638924	136576	51140	85437	507747	131177	0.823887	0.176113	0.794691	0.205309
AsianFermentation	CEKOSW	775500	638028	137472	51521	85952	507366	130662	0.822731	0.177269	0.79521	0.20479
AsianFermentation	JQ10_6	775500	657224	118276	38084	80193	520803	136421	0.847484	0.152516	0.792428	0.207572
Huangjiu	BI003	775500	625140	150360	58049	92312	500838	124302	0.806112	0.193888	0.801161	0.198839
Huangjiu	BI001	775500	629338	146162	55858	90305	503029	126309	0.811525	0.188475	0.799299	0.200701
Huangjiu	CHMOSW	775500	640517	134983	50266	84718	508621	131896	0.825941	0.174059	0.794079	0.205921
Huangjiu	CGKOSW	775500	636382	139118	52204	86915	506683	129699	0.820609	0.179391	0.796193	0.203807
Huangjiu	BRGOSW	775500	639087	136413	50935	85479	507952	131135	0.824097	0.175903	0.794809	0.205191
Huangjiu	BI004	775500	628321	147179	56411	90769	502476	125845	0.810214	0.189786	0.799712	0.200288
Huangjiu	MJQ3_1	775500	633882	141618	52630	88989	506257	127625	0.817385	0.182615	0.798661	0.201339
Huangjiu	ANG_CJ_1	775500	630847	144653	53892	90762	504995	125852	0.813471	0.186529	0.800503	0.199497
Huangjiu	BQ1_1	775500	657863	117637	38012	79626	520875	136988	0.848308	0.151692	0.791768	0.208232
Huangjiu	MTJZ2	775500	610763	164737	71733	93005	487154	123609	0.787573	0.212427	0.797615	0.202385
Huangjiu	MTJZ1	775500	534797	240703	133692	107012	425195	109602	0.689616	0.310384	0.795059	0.204941
Huangjiu	BTP1	775500	634616	140884	52942	87943	505945	128671	0.818331	0.181669	0.797246	0.202754
Huangjiu	HN3_8	775500	631899	143601	54083	89519	504804	127095	0.814828	0.185172	0.798868	0.201132
Huangjiu	BQ8_2	775500	612811	162689	69773	92917	489114	123697	0.790214	0.209786	0.798148	0.201852
Huangjiu	BQ8_1	775500	632670	142830	53732	89099	505155	127515	0.815822	0.184178	0.798449	0.201551
Huangjiu	CGQOSW	775500	637045	138455	51963	86493	506924	130121	0.821464	0.178536	0.795743	0.204257
Huangjiu	ALKOSW	775500	607633	167867	75091	92777	483796	123837	0.783537	0.216463	0.796198	0.203802
Huangjiu	ALCOSW	775500	612310	163190	72464	90727	486423	125887	0.789568	0.210432	0.794406	0.205594
Huangjiu	ALHOSW	775500	636901	138599	51763	86837	507124	129777	0.821278	0.178722	0.796237	0.203763
Huangjiu	ALBOSW	775500	637529	137971	51525	86447	507362	130167	0.822088	0.177912	0.795826	0.204174
Huangjiu	ALAOSW	775500	638264	137236	51159	86078	507728	130536	0.823035	0.176965	0.795483	0.204517
Huangjiu	AKROSW	775500	639021	136479	50827	85653	508060	130961	0.824012	0.175988	0.79506	0.20494
MosaicsR3	BDCOSW	775500	599528	175972	81749	94224	477138	122390	0.773086	0.226914	0.795856	0.204144
MosaicsR3	BDGOSW	775500	609889	165611	73839	91773	485048	124841	0.786446	0.213554	0.795305	0.204695
MosaicsR3	BDFOSW	775500	620428	155072	65234	89839	493653	126775	0.800036	0.199964	0.795665	0.204335
MosaicsR3	SACE_YAN	775500	632956	142544	54149	88396	504738	128218	0.816191	0.183809	0.79743	0.20257
MosaicsR3	ABHOSW	775500	638455	137045	50982	86064	507905	130550	0.823282	0.176718	0.795522	0.204478
MosaicsR3	L715	775500	624101	151399	58584	92816	500303	123798	0.804772	0.195228	0.801638	0.198362
MosaicsR3	AGTOSW	775500	639819	135681	50518	85164	508369	131450	0.825041	0.174959	0.794551	0.205449
MosaicsR3	SACE_YAL	775500	623906	151594	57774	93821	501113	122793	0.804521	0.195479	0.803187	0.196813
MosaicsR3	ABFOSW	775500	637971	137529	51169	86361	507718	130253	0.822658	0.177342	0.795832	0.204168
MosaicsR3	SACE_YDN	775500	641954	133546	49596	83951	509291	132663	0.827794	0.172206	0.793345	0.206655
MosaicsR3	SACE_YBM	775500	635210	140290	52492	87799	506395	128815	0.819097	0.180903	0.797209	0.202791
MosaicsR3	SACE_YDL	775500	621100	154400	61940	92461	496947	124153	0.800903	0.199097	0.800108	0.199892
MosaicsR3	ABCOSW	775500	638452	137048	51021	86028	507866	130586	0.823278	0.176722	0.795465	0.204535
MosaicsR3	BBLOSW	775500	459231	316269	195609	120661	363278	95953	0.592174	0.407826	0.791057	0.208943
MosaicsR3	CDCOSW	775500	639181	136319	51001	85319	507886	131295	0.824218	0.175782	0.794589	0.205411
MosaicsR3	CDEOSW	775500	637778	137722	51511	86212	507376	130402	0.822409	0.177591	0.795537	0.204463
MosaicsR3	CDDOSW	775500	638378	137122	51224	85899	507663	130715	0.823182	0.176818	0.795239	0.204761
MosaicsR3	BTIOSW	775500	641508	133992	49820	84173	509067	132441	0.827219	0.172781	0.793547	0.206453
MosaicsR3	AKSOSW	775500	638134	137366	51431	85936	507456	130678	0.822868	0.177132	0.795219	0.204781
MosaicsR3	EXF6780	775500	621621	153879	59988	93892	498899	122722	0.801574	0.198426	0.802577	0.197423
MosaicsR3	BFLOSW	775500	640530	134970	50220	84751	508667	131863	0.825957	0.174043	0.794135	0.205865
MosaicsR3	BFAOSW	775500	639870	135630	50560	85071	508327	131543	0.825106	0.174894	0.794422	0.205578
MosaicsR3	BDMOSW	775500	625973	149527	61122	88406	497765	128208	0.807186	0.192814	0.795186	0.204814
MosaicsR3	L709	775500	620566	154934	59512	95423	499375	121191	0.800214	0.199786	0.804709	0.195291
MosaicsR3	ACLOSW	775500	581767	193733	96792	96942	462095	119672	0.750183	0.249817	0.794296	0.205704
MosaicsR3	ACIOSW	775500	638097	137403	51172	86232	507715	130382	0.82282	0.17718	0.795671	0.204329
MosaicsR3	SACE_YCS	775500	625212	150288	57408	92881	501479	123733	0.806205	0.193795	0.802094	0.197906
Malaysian	UWO03_433_3	775500	598383	177117	73410	103708	485477	112906	0.771609	0.228391	0.811315	0.188685
Malaysian	SACE_YCY	775500	576766	198734	89134	109601	469753	107013	0.743734	0.256266	0.81446	0.18554
Malaysian	L750	775500	611675	163825	64583	99243	494304	117371	0.788749	0.211251	0.808115	0.191885
Malaysian	SACE_MAL	775500	513855	261645	136550	125096	422337	91518	0.662611	0.337389	0.821899	0.178101
Malaysian	AKMOSW	775500	638498	137002	51106	85897	507781	130717	0.823337	0.176663	0.795274	0.204726
Malaysian	BMAOSW	775500	637793	137707	51662	86046	507225	130568	0.822428	0.177572	0.795282	0.204718
Malaysian	BMCOSW	775500	639794	135706	50670	85037	508217	131577	0.825008	0.174992	0.794345	0.205655
Malaysian	BMBOSW	775500	638303	137197	51324	85874	507563	130740	0.823086	0.176914	0.795176	0.204824
MosaicsR3	CEQOSW	775500	635755	139745	52320	87426	506567	129188	0.8198	0.1802	0.796796	0.203204
AfricanPalmWine	CFAOSW	775500	638301	137199	51562	85638	507325	130976	0.823083	0.176917	0.794805	0.205195
AfricanPalmWine	BAFOSW	775500	636965	138535	52143	86393	506744	130221	0.82136	0.17864	0.79556	0.20444
AfricanPalmWine	BAAOSW	775500	637806	137694	51742	85953	507145	130661	0.822445	0.177555	0.79514	0.20486
AfricanPalmWine	AVVOSW	775500	640051	135449	50719	84731	508168	131883	0.82534	0.17466	0.793949	0.206051
AfricanPalmWine	BAEOSW	775500	639091	136409	51237	85173	507650	131441	0.824102	0.175898	0.794331	0.205669
AfricanPalmWine	BACOSW	775500	640063	135437	50805	84633	508082	131981	0.825355	0.174645	0.7938	0.2062
AfricanPalmWine	BADOSW	775500	639050	136450	51213	85238	507674	131376	0.824049	0.175951	0.79442	0.20558
AfricanPalmWine	BABOSW	775500	639485	136015	50959	85057	507928	131557	0.82461	0.17539	0.794277	0.205723
AfricanPalmWine	SACE_GAL	775500	613432	162068	63255	98814	495632	117800	0.791015	0.208985	0.807966	0.192034
AfricanPalmWine	YUC22_34D	775500	628925	146575	55563	91013	503324	125601	0.810993	0.189007	0.800293	0.199707
AfricanPalmWine	YH1	775500	609582	165918	66729	99190	492158	117424	0.78605	0.21395	0.80737	0.19263
AfricanPalmWine	CQBOSW	775500	638941	136559	51322	85238	507565	131376	0.823908	0.176092	0.794385	0.205615
AfricanPalmWine	CQAOSW	775500	604686	170814	77743	93072	481144	123542	0.779737	0.220263	0.795692	0.204308
AfricanPalmWine	CPTOSW	775500	613000	162500	70728	91773	488159	124841	0.790458	0.209542	0.796344	0.203656
AfricanPalmWine	CPSOSW	775500	636853	138647	52199	86449	506688	130165	0.821216	0.178784	0.795612	0.204388
AfricanPalmWine	AHSOSW	775500	617075	158425	68702	89724	490185	126890	0.795712	0.204288	0.794369	0.205631
AfricanPalmWine	AKGOSW	775500	613030	162470	71023	91448	487864	125166	0.790496	0.209504	0.795824	0.204176
AfricanPalmWine	ADVOSW	775500	640194	135306	50239	85068	508648	131546	0.825524	0.174476	0.794522	0.205478
AfricanPalmWine	L711	775500	627259	148241	56911	91331	501976	125283	0.808845	0.191155	0.800269	0.199731
AfricanPalmWine	L710	775500	618900	156600	60917	95684	497970	120930	0.798066	0.201934	0.804605	0.195395
AfricanPalmWine	SACE_YCV	775500	590100	185400	83707	101694	475180	114920	0.760928	0.239072	0.805253	0.194747
AfricanPalmWine	SACE_YBP	775500	621816	153684	59460	94225	499427	122389	0.801826	0.198174	0.803175	0.196825
AfricanPalmWine	APQOSW	775500	636650	138850	52071	86780	506816	129834	0.820954	0.179046	0.796067	0.203933
AfricanPalmWine	ATPOSW	775500	638423	137077	51693	85385	507194	131229	0.82324	0.17676	0.794448	0.205552
AfricanPalmWine	APROSW	775500	614528	160972	69771	91202	489116	125412	0.792428	0.207572	0.795921	0.204079
AfricanPalmWine	SACE_YAC	775500	624885	150615	57766	92850	501121	123764	0.805783	0.194217	0.801941	0.198059
AfricanPalmWine	AKBOSW	775500	637013	138487	51919	86569	506968	130045	0.821422	0.178578	0.795852	0.204148
AfricanPalmWine	ADFOSW	775500	639629	135871	50762	85110	508125	131504	0.824796	0.175204	0.794406	0.205594
AfricanPalmWine	AKHOSW	775500	636478	139022	52322	86701	506565	129913	0.820732	0.179268	0.795888	0.204112
AfricanPalmWine	AKEOSW	775500	623506	151994	62607	89388	496280	127226	0.804005	0.195995	0.795951	0.204049
AfricanPalmWine	AKDOSW	775500	635915	139585	52413	87173	506474	129441	0.820006	0.179994	0.796449	0.203551
AfricanPalmWine	AKCOSW	775500	636794	138706	52123	86584	506764	130030	0.82114	0.17886	0.795805	0.204195
Other	SACE_YCX	775500	620902	154598	59282	95317	499605	121297	0.800647	0.199353	0.804644	0.195356
Other	SACE_GAT	775500	634746	140754	53051	87704	505836	128910	0.818499	0.181501	0.796911	0.203089
Other	CDNOSW	775500	639721	135779	50834	84946	508053	131668	0.824914	0.175086	0.794179	0.205821
SouthAmericaMix1	UFMG_CM_Y650	775500	668129	107371	30144	77228	528743	139386	0.861546	0.138454	0.791379	0.208621
SouthAmericaMix1	UFMG_CM_Y649	775500	667744	107756	30005	77752	528882	138862	0.86105	0.13895	0.792043	0.207957
SouthAmericaMix1	UFMG_CM_Y643	775500	542504	232996	114953	118044	443934	98570	0.699554	0.300446	0.818305	0.181695
SouthAmericaMix1	UFMG_CM_Y262	775500	665676	109824	30223	79602	528664	137012	0.858383	0.141617	0.794176	0.205824
SouthAmericaMix1	UFMG_CM_Y464	775500	676604	98896	26658	72239	532229	144375	0.872475	0.127525	0.786618	0.213382
SouthAmericaMix1	UFMG_CM_Y463	775500	557461	218039	105113	112927	453774	103687	0.718841	0.281159	0.814001	0.185999
SouthAmericaMix1	UFMG_CM_Y457	775500	566503	208997	99013	109985	459874	106629	0.7305	0.2695	0.811777	0.188223
SouthAmericaMix1	UFMG_CM_Y462	775500	674315	101185	27190	73996	531697	142618	0.869523	0.130477	0.788499	0.211501
SouthAmericaMix1	UFMG_CM_Y461	775500	672910	102590	27798	74793	531089	141821	0.867711	0.132289	0.789242	0.210758
SouthAmericaMix1	UFMG_CM_Y647	775500	670758	104742	29120	75623	529767	140991	0.864936	0.135064	0.789803	0.210197
SouthAmericaMix1	UFMG_CM_Y646	775500	671582	103918	28358	75561	530529	141053	0.865999	0.134001	0.789969	0.210031
SouthAmericaMix1	UFMG_CM_Y644	775500	550642	224858	109171	115688	449716	100926	0.710048	0.289952	0.816712	0.183288
SouthAmericaMix1	UFMG_CM_Y645	775500	673863	101637	27992	73646	530895	142968	0.86894	0.13106	0.787838	0.212162
SouthAmericaMix1	UFMG_CM_Y266	775500	556510	218990	105517	113474	453370	103140	0.717614	0.282386	0.814666	0.185334
SouthAmericaMix1	UFMG_CM_Y648	775500	672093	103407	28403	75005	530484	141609	0.866658	0.133342	0.789301	0.210699
SouthAmericaMix1	UFMG_CM_Y455	775500	672820	102680	27881	74800	531006	141814	0.867595	0.132405	0.789224	0.210776
SouthAmericaMix1	UFMG_CM_Y264	775500	676504	98996	26500	72497	532387	144117	0.872346	0.127654	0.786968	0.213032
SouthAmericaMix1	UFMG_CM_Y257	775500	542672	232828	114677	118152	444210	98462	0.69977	0.30023	0.818561	0.181439
SouthAmericaMix1	WL004	775500	627877	147623	56541	91083	502346	125531	0.809642	0.190358	0.800071	0.199929
SouthAmericaMix1	CCIOSW	775500	639051	136449	51053	85397	507834	131217	0.82405	0.17595	0.794669	0.205331
SouthAmericaMix1	CCGOSW	775500	641389	134111	50179	83933	508708	132681	0.827065	0.172935	0.793135	0.206865
SouthAmericaMix1	CMQOSW	775500	638266	137234	51166	86069	507721	130545	0.823038	0.176962	0.795469	0.204531
SouthAmericaMix1	CMPOSW	775500	634198	141302	53065	88238	505822	128376	0.817792	0.182208	0.797577	0.202423
SouthAmericaMix1	ACCOSW	775500	641639	133861	49481	84381	509406	132233	0.827387	0.172613	0.793914	0.206086
SouthAmericaMix1	CCHOSW	775500	587503	187997	89671	98327	469216	118287	0.75758	0.24242	0.798661	0.201339
SouthAmericaMix1	CCCOSW	775500	640256	135244	50355	84890	508532	131724	0.825604	0.174396	0.794264	0.205736
SouthAmericaMix1	CCDOSW	775500	643000	132500	49352	83149	509535	133465	0.829142	0.170858	0.792434	0.207566
SouthAmericaMix1	CCFOSW	775500	642517	132983	49446	83538	509441	133076	0.82852	0.17148	0.792883	0.207117
SouthAmericaMix1	CCEOSW	775500	641233	134267	50032	84236	508855	132378	0.826864	0.173136	0.793557	0.206443
CHN-III	HN11	775500	650411	125089	40610	84480	518277	132134	0.838699	0.161301	0.796845	0.203155
CHN-III	HN19	775500	655627	119873	39127	80747	519760	135867	0.845425	0.154575	0.792768	0.207232
CHN-III	HN9	775500	615275	160225	65791	94435	493096	122179	0.793391	0.206609	0.801424	0.198576
CHN-III	HN10	775500	629241	146259	55552	90708	503335	125906	0.8114	0.1886	0.799908	0.200092
CHN-III	BAQOSW	775500	636400	139100	52312	86789	506575	129825	0.820632	0.179368	0.796001	0.203999
CHN-III	BAMOSW	775500	635880	139620	52682	86939	506205	129675	0.819961	0.180039	0.79607	0.20393
CHN-IV	CCROSW	775500	642588	132912	49202	83711	509685	132903	0.828611	0.171389	0.793175	0.206825
CHN-IV	CCQOSW	775500	642153	133347	49350	83998	509537	132616	0.82805	0.17195	0.793482	0.206518
CHN-IV	CCSOSW	775500	642260	133240	49260	83981	509627	132633	0.828188	0.171812	0.79349	0.20651
CHN-IV	JL5	775500	574144	201356	98532	102825	460355	113789	0.740353	0.259647	0.801811	0.198189
CHN-IV	HLJ1	775500	628335	147165	56751	90415	502136	126199	0.810232	0.189768	0.799153	0.200847
CHN-IV	CDLOSW	775500	640375	135125	50336	84790	508551	131824	0.825758	0.174242	0.794146	0.205854
CHN-IV	SACE_YCR	775500	644113	131387	48605	82783	510282	133831	0.830578	0.169422	0.792224	0.207776
CHN-IV	WI002	775500	629244	146256	55967	90290	502920	126324	0.811404	0.188596	0.799245	0.200755
CHN-IV	CCNOSW	775500	642697	132803	49036	83768	509851	132846	0.828752	0.171248	0.793299	0.206701
CHN-IV	ACQOSW	775500	640190	135310	50200	85111	508687	131503	0.825519	0.174481	0.794588	0.205412
CHN-IV	BJ18	775500	617821	157679	63840	93840	495047	122774	0.796674	0.203326	0.801279	0.198721
CHN-IV	BJ17	775500	635231	140269	52600	87670	506287	128944	0.819124	0.180876	0.797012	0.202988
CHN-IV	BJ26	775500	605288	170212	75850	94363	483037	122251	0.780513	0.219487	0.798028	0.201972
CHN-IV	BJ25	775500	655151	120349	39204	81146	519683	135468	0.844811	0.155189	0.793226	0.206774
CHN-IV	BJ20	775500	636991	138509	51663	86847	507224	129767	0.821394	0.178606	0.796281	0.203719
CHN-IV	BAKOSW	775500	639843	135657	50630	85028	508257	131586	0.825072	0.174928	0.794346	0.205654
CHN-IV	BJ8	775500	623963	151537	58448	93090	500439	123524	0.804594	0.195406	0.802033	0.197967
CHN-IV	BJ27	775500	633745	141755	53550	88206	505337	128408	0.817208	0.182792	0.797382	0.202618
CHN-IV	BJ21	775500	635897	139603	52525	87079	506362	129535	0.819983	0.180017	0.796296	0.203704
CHN-IV	BJ22	775500	618655	156845	68824	88022	490063	128592	0.79775	0.20225	0.792143	0.207857
CHN-IV	BJ24	775500	622219	153281	60387	92895	498500	123719	0.802346	0.197654	0.801165	0.198835
CHN-IV	BJ16	775500	624624	150876	58052	92825	500835	123789	0.805447	0.194553	0.801818	0.198182
CHN-IV	BJ15	775500	625780	149720	59117	90604	499770	126010	0.806937	0.193063	0.798635	0.201365
CHN-IV	BJ19	775500	636858	138642	51897	86746	506990	129868	0.821222	0.178778	0.79608	0.20392
CHN-IV	BJ14	775500	616876	158624	62940	95685	495947	120929	0.795456	0.204544	0.803965	0.196035
CHN-IV	BJ6	775500	625937	149563	57989	91575	500898	125039	0.80714	0.19286	0.800237	0.199763
CHN-IV	BJ3	775500	633646	141854	53508	88347	505379	128267	0.817081	0.182919	0.797573	0.202427
CHN-IV	BAIOSW	775500	640467	135033	50307	84727	508580	131887	0.825876	0.174124	0.794077	0.205923
CHN-II	SX7	775500	631654	143846	54853	88994	504034	127620	0.814512	0.185488	0.797959	0.202041
CHN-II	SX6	775500	615356	160144	63323	96822	495564	119792	0.793496	0.206504	0.805329	0.194671
CHN-II	SX4	775500	633145	142355	54003	88353	504884	128261	0.816435	0.183565	0.797422	0.202578
CHN-II	SX3	775500	631685	143815	54718	89098	504169	127516	0.814552	0.185448	0.798134	0.201866
CHN-II	BAHOSW	775500	640508	134992	50534	84459	508353	132155	0.825929	0.174071	0.793672	0.206328
CHN-II	SX8	775500	564591	210909	108523	102387	450364	114227	0.728035	0.271965	0.797682	0.202318
CHN-II	SX2	775500	657109	118391	38986	79406	519901	137208	0.847336	0.152664	0.791194	0.208806
CHN-II	SX5	775500	626407	149093	57837	91257	501050	125357	0.807746	0.192254	0.799879	0.200121
CHN-II	SX1	775500	635863	139637	52688	86950	506199	129664	0.819939	0.180061	0.796082	0.203918
CHN-II	BAGOSW	775500	639589	135911	50981	84931	507906	131683	0.824744	0.175256	0.794113	0.205887
CHN-IX	CEIOSW	775500	634280	141220	54337	86884	504550	129730	0.817898	0.182102	0.795469	0.204531
CHN-IX	CEGOSW	775500	635317	140183	53960	86224	504927	130390	0.819235	0.180765	0.794764	0.205236
CHN-IX	AMHOSW	775500	635020	140480	54106	86375	504781	130239	0.818852	0.181148	0.794906	0.205094
CHN-IX	XXYS1_4	775500	631596	143904	55517	88388	503370	128226	0.814437	0.185563	0.796981	0.203019
CHN-IX	XXYS14_1	775500	633683	141817	54452	87366	504435	129248	0.817128	0.182872	0.796037	0.203963
CHN-IX	XXY30L_2	775500	653324	122176	41459	80718	517428	135896	0.842455	0.157545	0.791993	0.208007
CHN-IX	XXY26L_1	775500	632028	143472	55228	88245	503659	128369	0.814994	0.185006	0.796893	0.203107
CHN-IX	JXXY16_1	775500	632307	143193	55141	88053	503746	128561	0.815354	0.184646	0.796679	0.203321
CHN-IX	JXXY10_1	775500	631402	144098	55637	88462	503250	128152	0.814187	0.185813	0.797036	0.202964
CHN-I	FJ5	775500	628158	147342	57173	90170	501714	126444	0.810004	0.189996	0.798707	0.201293
CHN-I	FJ9	775500	594096	181404	86089	95316	472798	121298	0.766081	0.233919	0.795828	0.204172
CHN-I	FJ8	775500	627619	147881	57529	90353	501358	126261	0.809309	0.190691	0.798825	0.201175
CHN-I	FJ7	775500	627300	148200	57639	90562	501248	126052	0.808897	0.191103	0.799056	0.200944
CHN-I	FJ10	775500	634558	140942	53903	87040	504984	129574	0.818257	0.181743	0.795804	0.204196
CHN-I	HN2	775500	606719	168781	74174	94608	484713	122006	0.782358	0.217642	0.798909	0.201091
CHN-I	HN3	775500	631060	144440	55686	88755	503201	127859	0.813746	0.186254	0.79739	0.20261
CHN-I	HN1	775500	633485	142015	54274	87742	504613	128872	0.816873	0.183127	0.796567	0.203433
CHN-I	HN4	775500	582585	192915	91261	101655	467626	114959	0.751238	0.248762	0.802674	0.197326
CHN-I	HN6	775500	633509	141991	54347	87645	504540	128969	0.816904	0.183096	0.796421	0.203579
CHN-I	HN5	775500	607817	167683	73667	94017	485220	122597	0.783774	0.216226	0.798299	0.201701
CHN-I	BALOSW	775500	637302	138198	52343	85856	506544	130758	0.821795	0.178205	0.794826	0.205174
CHN-X	FJ11	775500	631433	144067	54669	89399	504218	127215	0.814227	0.185773	0.79853	0.20147
CHN-X	GT99_1	775500	657686	117814	38464	79351	520423	137263	0.84808	0.15192	0.791294	0.208706
CHN-X	GT39_1	775500	659142	116358	37675	78684	521212	137930	0.849957	0.150043	0.790743	0.209257
CHN-X	FJSA40_2	775500	656822	118678	38605	80074	520282	136540	0.846966	0.153034	0.79212	0.20788
CHN-X	NGS21L_1	775500	659813	115687	37663	78025	521224	138589	0.850823	0.149177	0.789957	0.210043
CHN-X	JXXY1_1	775500	636660	138840	51919	86922	506968	129692	0.820967	0.179033	0.796293	0.203707
CHN-X	JHBMY20_1	775500	615511	159989	65055	94935	493832	121679	0.793696	0.206304	0.802312	0.197688
Other	AMMOSW	775500	638041	137459	51648	85812	507239	130802	0.822748	0.177252	0.794994	0.205006
CHN-V	SX9	775500	658212	117288	38696	78593	520191	138021	0.848758	0.151242	0.790309	0.209691
CHN-V	HN15	775500	622745	152755	59561	93195	499326	123419	0.803024	0.196976	0.801815	0.198185
CHN-V	BANOSW	775500	638419	137081	51241	85841	507646	130773	0.823235	0.176765	0.795161	0.204839
CHN-V	HN16	775500	543514	231986	122818	109169	436069	107445	0.700856	0.299144	0.802314	0.197686
CHN-V	BAPOSW	775500	638399	137101	51321	85781	507566	130833	0.82321	0.17679	0.795061	0.204939
CHN-V	FJ6	775500	617222	158278	65536	92743	493351	123871	0.795902	0.204098	0.799309	0.200691
CHN-V	FJ3	775500	613409	162091	69457	92635	489430	123979	0.790985	0.209015	0.797885	0.202115
CHN-V	FJ2	775500	521333	254167	142490	111678	416397	104936	0.672254	0.327746	0.798716	0.201284
CHN-V	FJ4	775500	564487	211013	109769	101245	449118	115369	0.727901	0.272099	0.795622	0.204378
CHN-V	HN13	775500	629878	145622	55745	89878	503142	126736	0.812222	0.187778	0.798793	0.201207
CHN-V	HN14	775500	576216	199284	97771	101514	461116	115100	0.743025	0.256975	0.800249	0.199751
CHN-V	HN18	775500	587258	188242	90284	97959	468603	118655	0.757264	0.242736	0.797951	0.202049
CHN-V	HN17	775500	608947	166553	72667	93887	486220	122727	0.785231	0.214769	0.79846	0.20154
SouthAfrica	SACE_YCB	775500	640896	134604	50124	84481	508763	132133	0.826429	0.173571	0.793831	0.206169
SouthAfrica	ABLOSW	775500	639963	135537	50385	85153	508502	131461	0.825226	0.174774	0.79458	0.20542
Other	SX11	775500	632015	143485	54197	89289	504690	127325	0.814977	0.185023	0.798541	0.201459
Other	SACE_YCN	775500	640114	135386	50554	84833	508333	131781	0.825421	0.174579	0.794129	0.205871
AsianIsland	ARIOSW	775500	582368	193132	94968	98165	463919	118449	0.750958	0.249042	0.796608	0.203392
AsianIsland	ARHOSW	775500	627692	147808	59357	88452	499530	128162	0.809403	0.190597	0.79582	0.20418
AsianIsland	SACE_YDE	775500	633118	142382	53809	88574	505078	128040	0.8164	0.1836	0.797763	0.202237
AsianIsland	SACE_YCM	775500	641931	133569	49965	83605	508922	133009	0.827764	0.172236	0.792799	0.207201
AsianIsland	ARGOSW	775500	637074	138426	52153	86274	506734	130340	0.821501	0.178499	0.795408	0.204592
AsianIsland	AGROSW	775500	638696	136804	51225	85580	507662	131034	0.823593	0.176407	0.794841	0.205159
AsianIsland	AHHOSW	775500	638935	136565	50856	85710	508031	130904	0.823901	0.176099	0.795122	0.204878
AsianIsland	AFKOSW	775500	636492	139008	52282	86727	506605	129887	0.82075	0.17925	0.795933	0.204067
AsianIsland	CDAOSW	775500	640387	135113	50464	84650	508423	131964	0.825773	0.174227	0.793931	0.206069
AsianIsland	CCVOSW	775500	639423	136077	50671	85407	508216	131207	0.82453	0.17547	0.794804	0.205196
AsianIsland	CCTOSW	775500	638423	137077	51390	85688	507497	130926	0.82324	0.17676	0.794923	0.205077
CHN-VI	FJ1	775500	622438	153062	62015	91048	496872	125566	0.802628	0.197372	0.798267	0.201733
CHN-VI	WL008	775500	598732	176768	75714	101055	483173	115559	0.772059	0.227941	0.806994	0.193006
CHN-VI	YN5	775500	627279	148221	57020	91202	501867	125412	0.80887	0.19113	0.80007	0.19993
CHN-VI	YN1	775500	624806	150694	57918	92777	500969	123837	0.805681	0.194319	0.801799	0.198201
CHN-VI	JL4	775500	637817	137683	51414	86270	507473	130344	0.822459	0.177541	0.79564	0.20436
CHN-VI	HLJ3	775500	628155	147345	56437	90909	502450	125705	0.81	0.19	0.799882	0.200118
CHN-VI	HLJ2	775500	626031	149469	57655	91815	501232	124799	0.807261	0.192739	0.80065	0.19935
CHN-VI	YN6	775500	602345	173155	78181	94975	480706	121639	0.776718	0.223282	0.798058	0.201942
CHN-VI	AMDOSW	775500	638728	136772	51286	85487	507601	131127	0.823634	0.176366	0.794706	0.205294
CHN-VI	CEHOSW	775500	640111	135389	50635	84755	508252	131859	0.825417	0.174583	0.794006	0.205994
CHN-VI	AMFOSW	775500	637817	137683	51613	86071	507274	130543	0.822459	0.177541	0.795328	0.204672
CHN-VI	SX10	775500	601572	173928	78762	95167	480125	121447	0.775721	0.224279	0.798117	0.201883
CHN-VI	BJ4	775500	585268	190232	89746	100487	469141	116127	0.754698	0.245302	0.801583	0.198417
CHN-VI	SD2	775500	573475	202025	101324	100702	457563	115912	0.739491	0.260509	0.797878	0.202122
CHN-VI	SD1	775500	587433	188067	89614	98454	469273	118160	0.757489	0.242511	0.798854	0.201146
FarEastRussian	CDIOSW	775500	638445	137055	51261	85795	507626	130819	0.823269	0.176731	0.795097	0.204903
FarEastRussian	CDHOSW	775500	637285	138215	51915	86301	506972	130313	0.821773	0.178227	0.795518	0.204482
FarEastRussian	CDGOSW	775500	638920	136580	51085	85496	507802	131118	0.823881	0.176119	0.794782	0.205218
FarEastRussian	CDFOSW	775500	639329	136171	50667	85505	508220	131109	0.824409	0.175591	0.794927	0.205073
CHN-VI	SD3	775500	625303	150197	58124	92074	500763	124540	0.806322	0.193678	0.800833	0.199167
CHN-VI	BJ28	775500	629967	145533	55754	89780	503133	126834	0.812337	0.187663	0.798666	0.201334
CHN-VI	XJ7	775500	630083	145417	55652	89766	503235	126848	0.812486	0.187514	0.79868	0.20132
CHN-VI	XJ1	775500	619811	155689	63355	92335	495532	124279	0.79924	0.20076	0.799489	0.200511
CHN-VI	XJ6	775500	627913	147587	56933	90655	501954	125959	0.809688	0.190312	0.799401	0.200599
CHN-VI	FJ12	775500	629718	145782	55994	89789	502893	126825	0.812015	0.187985	0.7986	0.2014
CHN-VI	BJ7	775500	661219	114281	37072	77210	521815	139404	0.852636	0.147364	0.789171	0.210829
NorthAmerican	ZP784	775500	620564	154936	61089	93848	497798	122766	0.800211	0.199789	0.80217	0.19783
NorthAmerican	ZP786	775500	619871	155629	61672	93958	497215	122656	0.799318	0.200682	0.802127	0.197873
NorthAmerican	ZP823	775500	622705	152795	59648	93148	499239	123466	0.802972	0.197028	0.801726	0.198274
NorthAmerican	ZP794	775500	624194	151306	58760	92547	500127	124067	0.804892	0.195108	0.801236	0.198764
Other	CCPOSW	775500	640874	134626	50003	84624	508884	131990	0.826401	0.173599	0.794047	0.205953
NorthAmerican	ZP796	775500	620366	155134	61397	93738	497490	122876	0.799956	0.200044	0.80193	0.19807
NorthAmerican	ZP793	775500	618477	157023	62488	94536	496399	122078	0.79752	0.20248	0.802615	0.197385
NorthAmerican	ZP817	775500	620913	154587	60436	94152	498451	122462	0.800662	0.199338	0.802771	0.197229
NorthAmerican	ZP781	775500	620634	154866	61251	93616	497636	122998	0.800302	0.199698	0.801819	0.198181
NorthAmerican	ZP783	775500	620340	155160	61418	93743	497469	122871	0.799923	0.200077	0.80193	0.19807
NorthAmerican	ZP778	775500	616291	159209	63952	95258	494935	121356	0.794701	0.205299	0.803087	0.196913
NorthAmerican	ZP785	775500	621479	154021	60459	93563	498428	123051	0.801391	0.198609	0.802003	0.197997
NorthAmerican	ZP779	775500	622042	153458	60080	93379	498807	123235	0.802117	0.197883	0.801886	0.198114
NorthAmerican	SACE_YCW	775500	623549	151951	58438	93514	500449	123100	0.804061	0.195939	0.802582	0.197418
NorthAmerican	SACE_GAS	775500	633766	141734	53831	87904	505056	128710	0.817235	0.182765	0.796912	0.203088
NorthAmerican	CDQOSW	775500	639915	135585	50670	84916	508217	131698	0.825164	0.174836	0.794195	0.205805
NorthAmerican	AMCOSW	775500	638689	136811	51230	85582	507657	131032	0.823583	0.176417	0.794842	0.205158
NorthAmerican	AMBOSW	775500	638487	137013	51204	85810	507683	130804	0.823323	0.176677	0.795134	0.204866
Other	ZP530	775500	622925	152575	58163	94413	500724	122201	0.803256	0.196744	0.803827	0.196173
Other	BBROSW	775500	639318	136182	50947	85236	507940	131378	0.824395	0.175605	0.794503	0.205497
Other	UFMG_CM_Y255	775500	559105	216395	104081	112315	454806	104299	0.720961	0.279039	0.813454	0.186546
NorthAmerican	SACE_YCO	775500	637492	138008	51636	86373	507251	130241	0.82204	0.17796	0.795698	0.204302
NorthAmerican	SDO3s1	775500	619560	155940	61512	94429	497375	122185	0.798917	0.201083	0.802787	0.197213
NorthAmerican	SDO2s1	775500	620723	154777	61259	93519	497628	123095	0.800417	0.199583	0.801691	0.198309
NorthAmerican	SDO8s1	775500	622683	152817	59508	93310	499379	123304	0.802944	0.197056	0.801979	0.198021
NorthAmerican	SDO6s1	775500	621085	154415	60498	93918	498389	122696	0.800883	0.199117	0.802449	0.197551
NorthAmerican	SM69s1	775500	622413	153087	59262	93826	499625	122788	0.802596	0.197404	0.802723	0.197277
NorthAmerican	SACE_YDI	775500	633563	141937	53583	88355	505304	128259	0.816974	0.183026	0.797559	0.202441
NorthAmerican	ADGOSW	775500	641888	133612	49591	84022	509296	132592	0.827709	0.172291	0.793434	0.206566
NorthAmerican	CMSOSW	775500	640415	135085	50266	84820	508621	131794	0.825809	0.174191	0.794205	0.205795
NorthAmerican	CDPOSW	775500	640633	134867	50365	84503	508522	132111	0.82609	0.17391	0.793781	0.206219
NorthAmerican	ZP652	775500	609752	165748	63665	102084	495222	114530	0.78627	0.21373	0.81217	0.18783
NorthAmerican	ZP657	775500	610309	165191	67384	97808	491503	118806	0.786988	0.213012	0.805335	0.194665
NorthAmerican	ZP653	775500	610796	164704	67129	97576	491758	119038	0.787616	0.212384	0.80511	0.19489
NorthAmerican	ZP656	775500	617330	158170	63479	94692	495408	121922	0.796041	0.203959	0.802501	0.197499
NorthAmerican	ZP654	775500	618216	157284	62269	95016	496618	121598	0.797184	0.202816	0.803308	0.196692
NorthAmerican	ZP658	775500	621757	153743	60303	93441	498584	123173	0.80175	0.19825	0.801895	0.198105
NorthAmerican	ZP655	775500	622318	153182	60409	92774	498478	123840	0.802473	0.197527	0.801002	0.198998
NorthAmerican	ZP651	775500	622657	152843	57399	95445	501488	121169	0.80291	0.19709	0.8054	0.1946
NorthAmerican	ZP680	775500	613697	161803	64370	97434	494517	119180	0.791357	0.208643	0.8058	0.1942
NorthAmerican	ZP676	775500	617655	157845	63237	94609	495650	122005	0.79646	0.20354	0.802471	0.197529
NorthAmerican	ZP677	775500	619602	155898	61736	94163	497151	122451	0.798971	0.201029	0.802372	0.197628
NorthAmerican	ZP674	775500	618726	156774	62340	94435	496547	122179	0.797841	0.202159	0.802531	0.197469
NorthAmerican	ZP678	775500	621355	154145	60386	93760	498501	122854	0.801231	0.198769	0.80228	0.19772
NorthAmerican	ZP650	775500	620671	154829	61146	93684	497741	122930	0.800349	0.199651	0.80194	0.19806
NorthAmerican	ZP649	775500	625178	150322	58463	91860	500424	124754	0.806161	0.193839	0.80045	0.19955
Other	CDBOSW	775500	638584	136916	51275	85642	507612	130972	0.823448	0.176552	0.794902	0.205098
Other	BEGOSW	775500	589404	186096	88832	97265	470055	119349	0.760031	0.239969	0.797509	0.202491
Other	ZP675	775500	618384	157116	62689	94428	496198	122186	0.7974	0.2026	0.802411	0.197589
NorthAmerican	ACDOSW	775500	640391	135109	50152	84958	508735	131656	0.825778	0.174222	0.794413	0.205587
NorthAmerican	SACE_YCU	775500	639976	135524	50751	84774	508136	131840	0.825243	0.174757	0.793992	0.206008
NorthAmerican	SACE_YBS	775500	640934	134566	50238	84329	508649	132285	0.826478	0.173522	0.793606	0.206394
NorthAmerican	AVIOSW	775500	636860	138640	52111	86530	506776	130084	0.821225	0.178775	0.795742	0.204258
NorthAmerican	ANCOSW	775500	639297	136203	50998	85206	507889	131408	0.824368	0.175632	0.794449	0.205551
NorthAmerican	ANEOSW	775500	638170	137330	51382	85949	507505	130665	0.822914	0.177086	0.79525	0.20475
NorthAmerican	ANGOSW	775500	640540	134960	50336	84625	508551	131989	0.82597	0.17403	0.793941	0.206059
NorthAmerican	AKNOSW	775500	639365	136135	50938	85198	507949	131416	0.824455	0.175545	0.794459	0.205541
NorthAmerican	ANFOSW	775500	639275	136225	50798	85428	508089	131186	0.824339	0.175661	0.794789	0.205211
NorthAmerican	ANDOSW	775500	639424	136076	50951	85126	507936	131488	0.824531	0.175469	0.794365	0.205635
NorthAmerican	ANHOSW	775500	639870	135630	50513	85118	508374	131496	0.825106	0.174894	0.794496	0.205504
NorthAmerican	ANKOSW	775500	640944	134556	49993	84564	508894	132050	0.826491	0.173509	0.793976	0.206024
NorthAmerican	ANIOSW	775500	640009	135491	50671	84821	508216	131793	0.825286	0.174714	0.794076	0.205924

## Sheet: Table S4
Data Blocks
Strain	number of Events	S.par markers count	Genomic percentage	Clade
A8	3131	39054	5.87	Alpechin
ZIM_2221	3134	34560	5.13	Alpechin
AP_5_4	2900	33426	5.02	Alpechin
YO_654	2849	32462	4.77	Alpechin
PYCC_6733	3166	31741	4.48	Alpechin
ZIM_2580	2917	31550	4.67	Alpechin
MM_11	2911	31502	4.66	Alpechin
CGEOSW	2892	31156	4.91	Alpechin
CGDOSW	2893	31102	4.93	Alpechin
AP_17_1	2903	31070	4.8	Alpechin
PYCC_6732	2943	30913	4.61	Alpechin
XXY30L_2	27549	29960	0.56	CHN-IX
PYCC_4891	3142	29867	4.33	Alpechin
CEIOSW	27398	29836	0.61	CHN-IX
CEGOSW	27394	29835	0.61	CHN-IX
AMHOSW	27372	29826	0.57	CHN-IX
PYCC_2613	3046	29757	4.34	Alpechin
XXYS14_1	27234	29658	0.58	CHN-IX
JXXY16_1	27163	29584	0.62	CHN-IX
XXY26L_1	27183	29583	0.61	CHN-IX
JXXY10_1	27151	29581	0.58	CHN-IX
XXYS1_4	27161	29577	0.56	CHN-IX
AQAOSW	3062	29513	4.55	Alpechin
AP_16_1	2944	29031	4.3	Alpechin
PYCC_2708	2930	28859	4.14	Alpechin
BRKOSW	2869	28739	4.61	Alpechin
AHLOSW	2865	28566	4.51	Alpechin
CDTOSW	2891	28539	4.47	Alpechin
NRRL_Y_12658	2923	28539	4.15	Alpechin
AIDOSW	2986	28325	4.38	Alpechin
PYCC_4935	2953	28283	4.19	Alpechin
PYCC_6731	2951	27864	4.25	Alpechin
SACE_YBR	2884	27364	4.57	Alpechin
AP_7_2	2928	27322	3.9	Alpechin
PYCC_6730	2991	27118	4.08	Alpechin
S27	2926	26826	4.06	Alpechin
CPNOSW	5494	26479	3.82	MexicanAgave
AVBOSW	2880	26420	3.94	Alpechin
AQDOSW	2949	26220	4.18	Alpechin
AP_6_2	2738	26001	4.07	Alpechin
AHMOSW	2845	25432	4.08	Alpechin
ABMOSW	2870	25376	4.09	Alpechin
AIEOSW	2773	25284	3.82	Alpechin
CPROSW	5062	25193	3.68	MexicanAgave
CPGOSW	2899	24693	3.87	Alpechin
YO_653	2874	24563	3.45	Alpechin
SACE_YDM	2832	24238	3.96	Alpechin
SACE_YAE	2860	23105	3.91	Alpechin
ATQOSW	2520	22429	3.59	Alpechin
YO_652	2842	22300	3.03	Alpechin
CPQOSW	5106	20444	2.61	MexicanAgave
HN1	17621	18620	0.32	CHN-I
BALOSW	17670	18600	0.31	CHN-I
FJ10	17618	18592	0.31	CHN-I
FJ7	17594	18575	0.33	CHN-I
HN6	17631	18562	0.31	CHN-I
HN3	17584	18557	0.33	CHN-I
FJ8	17572	18552	0.33	CHN-I
FJ5	17573	18542	0.3	CHN-I
HN5	16982	17878	0.29	CHN-I
HN2	16923	17853	0.32	CHN-I
FJ9	16453	17401	0.29	CHN-I
HN4	16419	17307	0.31	CHN-I
SX2	16290	17101	0.25	CHN-II
BAHOSW	16249	17057	0.27	CHN-II
BAGOSW	16160	16976	0.25	CHN-II
SX4	16154	16964	0.27	CHN-II
SX3	16106	16919	0.25	CHN-II
SX1	16097	16917	0.25	CHN-II
SX5	15994	16818	0.28	CHN-II
SX6	15924	16724	0.25	CHN-II
SX7	15523	16291	0.24	CHN-II
CPIOSW	5230	15959	1.95	MexicanAgave
SX8	14414	15133	0.23	CHN-II
BBMOSW	5574	14598	1.58	SouthAmericaMix2
CPMOSW	5179	14561	1.68	MexicanAgave
CPAOSW	5867	14278	1.65	SouthAmericaMix2
CPLOSW	5248	13873	1.65	MexicanAgave
CPKOSW	5234	13679	1.62	MexicanAgave
CQSOSW	6160	11276	1.12	SouthAmericaMix2
UFMG_CM_Y641	6048	11177	1.07	SouthAmericaMix2
UFMG_CM_Y642	6016	11110	1.04	SouthAmericaMix2
SX9	9963	10312	0.15	CHN-V
UFMG_CM_Y263	5402	10272	1.37	SouthAmericaMix2
UFMG_CM_Y650	5700	9071	0.66	SouthAmericaMix1
UFMG_CM_Y649	5699	9070	0.66	SouthAmericaMix1
UFMG_CM_Y646	5831	8803	0.5	SouthAmericaMix1
UFMG_CM_Y262	5699	8766	0.61	SouthAmericaMix1
UFMG_CM_Y647	5820	8729	0.51	SouthAmericaMix1
UFMG_CM_Y628	7155	8578	0.36	MosaicsR3
L715	8243	8508	0.11	MosaicsR3
CREOSW	6453	7941	0.33	MosaicsR3
CDLOSW	7542	7937	0.15	CHN-IV
CCNOSW	7541	7922	0.15	CHN-IV
SACE_YCR	7563	7922	0.14	CHN-IV
BJ19	7512	7921	0.14	CHN-IV
HLJ1	7508	7902	0.14	CHN-IV
BJ25	7487	7899	0.14	CHN-IV
ACQOSW	7486	7847	0.14	CHN-IV
BAIOSW	7451	7838	0.13	CHN-IV
BJ17	7461	7828	0.15	CHN-IV
WI002	7416	7797	0.14	CHN-IV
BJ3	7398	7792	0.14	CHN-IV
BJ21	7453	7772	0.12	CHN-IV
BJ16	7401	7764	0.13	CHN-IV
BJ6	7364	7741	0.15	CHN-IV
BJ27	7394	7728	0.12	CHN-IV
UFMG_CM_Y463	4956	7728	0.76	SouthAmericaMix1
BAKOSW	7370	7724	0.13	CHN-IV
BJ20	7361	7719	0.13	CHN-IV
BPAOSW	5917	7708	0.36	MosaicsR3
BJ15	7359	7693	0.12	CHN-IV
BIEOSW	5887	7655	0.36	MosaicsR3
BJ18	7293	7653	0.14	CHN-IV
UFMG_CM_Y464	5521	7647	0.42	SouthAmericaMix1
BJ14	7252	7626	0.14	CHN-IV
BJ8	7274	7609	0.13	CHN-IV
BJ24	7235	7600	0.13	CHN-IV
UFMG_CM_Y643	5125	7531	0.6	SouthAmericaMix1
ADEOSW	5355	7527	0.53	SouthAmericaMix2
BJ22	7133	7512	0.13	CHN-IV
BBTOSW	6328	7458	0.26	MosaicsR3
BJ26	7060	7428	0.13	CHN-IV
CCSOSW	7071	7394	0.13	CHN-IV
ALIOSW	6078	7362	0.35	SouthAmericaMix2
HN19	7057	7334	0.11	CHN-III
ALROSW	5566	7290	0.38	MosaicsR3
HN11	7009	7282	0.11	CHN-III
BAQOSW	6993	7258	0.15	CHN-III
HN10	6941	7221	0.16	CHN-III
BAMOSW	6957	7213	0.15	CHN-III
BCDOSW	6031	7209	0.38	FrenchGuiana
JL5	6859	7188	0.12	CHN-IV
CCROSW	6872	7180	0.13	CHN-IV
BDSOSW	6005	7178	0.46	FrenchGuiana
BDTOSW	5980	7174	0.47	FrenchGuiana
BDVOSW	5911	7169	0.49	FrenchGuiana
BCPOSW	5924	7162	0.47	FrenchGuiana
UFMG_CM_Y264	5621	7134	0.34	SouthAmericaMix1
UFMG_CM_Y455	5605	7128	0.34	SouthAmericaMix1
UFMG_CM_Y648	5588	7114	0.34	SouthAmericaMix1
BEEOSW	5957	7112	0.46	FrenchGuiana
BDPOSW	5930	7095	0.39	FrenchGuiana
BEBOSW	5989	7092	0.41	FrenchGuiana
BDQOSW	6050	7087	0.33	FrenchGuiana
BNBOSW	6008	7072	0.36	FrenchGuiana
BCBOSW	5972	7069	0.43	FrenchGuiana
HN9	6805	7067	0.15	CHN-III
BCQOSW	5942	7066	0.4	FrenchGuiana
CCQOSW	6665	7058	0.17	CHN-IV
BEDOSW	6007	7053	0.37	FrenchGuiana
BCKOSW	5982	7020	0.43	FrenchGuiana
BCCOSW	5982	7000	0.36	FrenchGuiana
BMROSW	5910	6987	0.37	FrenchGuiana
BNAOSW	5951	6972	0.42	FrenchGuiana
BTDOSW	6796	6969	0.08	MixOrigin
FJSA40_2	6656	6954	0.11	CHN-X
UFMG_CM_Y645	5434	6950	0.35	SouthAmericaMix1
BCMOSW	5903	6942	0.43	FrenchGuiana
BDROSW	5919	6942	0.42	FrenchGuiana
BCHOSW	5954	6937	0.36	FrenchGuiana
L758	6766	6931	0.1	MosaicsR3
BCEOSW	5950	6929	0.36	FrenchGuiana
GT39_1	6638	6924	0.1	CHN-X
BMVOSW	5913	6923	0.43	FrenchGuiana
GT99_1	6636	6894	0.1	CHN-X
ANGGW_1	6735	6893	0.1	Mantou-3
BEAOSW	5895	6854	0.35	FrenchGuiana
NGS21L_1	6571	6828	0.12	CHN-X
BCGOSW	5963	6826	0.29	FrenchGuiana
BCLOSW	5932	6825	0.34	FrenchGuiana
BTAOSW	5970	6798	0.22	MosaicsR3
JXXY1_1	6536	6784	0.1	CHN-X
BCFOSW	5951	6747	0.29	FrenchGuiana
BAFOSW	6433	6720	0.11	AfricanPalmWine
FJ11	6487	6715	0.11	CHN-X
BNDOSW	5836	6679	0.29	FrenchGuiana
CDNOSW	5176	6674	0.36	Other
UFMG_CM_Y461	5478	6665	0.24	SouthAmericaMix1
BNCOSW	5876	6657	0.27	FrenchGuiana
BFGOSW	6497	6651	0.07	MixOrigin
JHBMY20_1	6401	6649	0.14	CHN-X
BMDOSW	5331	6643	0.4	MosaicsR3
AP13_1	6469	6639	0.09	MixOrigin
CKKOSW	6473	6637	0.09	MixOrigin
SP003	6457	6613	0.08	MixOrigin
BCNOSW	5738	6589	0.29	FrenchGuiana
CBFOSW	6429	6589	0.09	MixOrigin
BR001	6428	6587	0.09	MixOrigin
L742	6395	6582	0.09	MosaicsR3
UFMG_CM_Y456	5216	6573	0.56	SouthAmericaMix2
BFMOSW	6413	6566	0.08	MixOrigin
BFEOSW	6412	6558	0.07	MixOrigin
BTEOSW	6401	6558	0.09	MixOrigin
BE038	6400	6557	0.08	MixOrigin
YA5	6400	6556	0.09	MixOrigin
CLAOSW	6396	6555	0.09	MixOrigin
BMBOSW	6334	6531	0.08	Malaysian
BMCOSW	6332	6526	0.08	Malaysian
AKMOSW	6331	6525	0.08	Malaysian
BMAOSW	6328	6524	0.09	Malaysian
BMEOSW	6090	6516	0.12	DairyProducts
CPSOSW	6265	6492	0.16	AfricanPalmWine
CMGOSW	6352	6490	0.08	MosaicsR3
YUC22	6328	6481	0.09	MixOrigin
LJM21_9	6292	6463	0.08	Mantou-2
BE025	6300	6462	0.09	MixOrigin
NX8_3	6286	6447	0.08	MosaicsR3
L746	6218	6434	0.09	MosaicsR3
BECOSW	5362	6424	0.37	FrenchGuiana
CKSOSW	6258	6412	0.09	MixOrigin
BE023	6235	6390	0.08	MixOrigin
SXJM1_1	6235	6382	0.07	Mantou-3
ANG1	6213	6371	0.08	MixOrigin
BCIOSW	5407	6367	0.33	FrenchGuiana
LJM21_10	6206	6363	0.08	Mantou-2
BR004	6209	6359	0.08	MixOrigin
BMMOSW	6201	6353	0.09	MixOrigin
UFMG_CM_Y644	4979	6345	0.34	SouthAmericaMix1
AF	6178	6338	0.07	MixOrigin
ATBOSW	6113	6336	0.09	MosaicsR3
CPCOSW	5499	6335	0.19	MosaicsR3
BE006	6175	6330	0.07	MixOrigin
BE028	6165	6323	0.07	MixOrigin
CFPOSW	6165	6320	0.08	MixOrigin
UFMG_CM_Y462	5531	6310	0.2	SouthAmericaMix1
AFB_1	6149	6305	0.08	MixOrigin
AMNOSW	6139	6293	0.07	MixOrigin
WL007	6144	6291	0.08	MixOrigin
SP001	6135	6288	0.07	MixOrigin
L750	6094	6276	0.1	Malaysian
BANOSW	6075	6275	0.09	CHN-V
JM4_8	6126	6271	0.07	Mantou-3
HN13	6071	6268	0.08	CHN-V
L709	5988	6264	0.1	MosaicsR3
CFIOSW	6102	6253	0.08	MixOrigin
CFNOSW	6093	6242	0.08	MixOrigin
BRVOSW	4925	6239	0.32	MosaicsR3
BE029	6087	6238	0.07	MixOrigin
JQ9_4	6074	6230	0.08	Mantou-6
BE005	6078	6228	0.08	MixOrigin
BABOSW	6042	6222	0.09	AfricanPalmWine
UFMG_CM_Y457	5042	6215	0.31	SouthAmericaMix1
BAPOSW	6025	6212	0.08	CHN-V
BADOSW	6025	6210	0.08	AfricanPalmWine
BMLOSW	6059	6204	0.07	MixOrigin
AVVOSW	6024	6203	0.09	AfricanPalmWine
BACOSW	6025	6203	0.08	AfricanPalmWine
BAEOSW	6021	6201	0.09	AfricanPalmWine
JM22_1	6055	6200	0.07	Mantou-3
WL006	6058	6200	0.07	MixOrigin
HN15	5999	6196	0.09	CHN-V
SP010	5422	6195	0.17	Other
JM13_2	6036	6177	0.07	Mantou-3
JM14_3	6018	6167	0.07	Mantou-3
SACE_YCY	5930	6164	0.17	Malaysian
BAAOSW	5984	6162	0.09	AfricanPalmWine
NX4_1	6016	6158	0.08	Other
TUM506	5988	6154	0.08	MixOrigin
DJM4_1	5996	6144	0.07	Mantou-3
CICOSW	5070	6137	0.24	MosaicsR3
LJM21_3	5952	6118	0.08	Mantou-2
CJM21_4	5963	6117	0.08	Mantou-2
TUM507	5956	6113	0.07	Beer
NX7_1	5947	6111	0.07	Mantou-3
CKNOSW	5785	6107	0.1	MosaicsR3
UFMG_CM_Y266	4942	6101	0.32	SouthAmericaMix1
ALVOSW	5841	6084	0.08	MixOrigin
CDGOSW	5677	6080	0.12	FarEastRussian
HN1_9	5944	6077	0.07	Mantou-2
CDFOSW	5669	6072	0.12	FarEastRussian
CDIOSW	5665	6060	0.12	FarEastRussian
QH7_3	5915	6054	0.07	Mantou-3
LJM6A_4	5897	6053	0.08	Mantou-2
L560	5907	6052	0.08	MixOrigin
CDHOSW	5652	6051	0.11	FarEastRussian
AMPOSW	3467	6049	0.47	MosaicsR1
CJM6_2	5894	6027	0.07	Mantou-3
HLJ4	5887	6026	0.1	Baijiu
FJ6	5837	6022	0.08	CHN-V
ABVOSW	5778	6017	0.09	MixOrigin
CIFOSW	5124	6011	0.3	MosaicsR3
HN17	5829	6011	0.08	CHN-V
CQBOSW	5794	6004	0.08	AfricanPalmWine
L753	5800	5997	0.09	MosaicsR3
CJM11_1	5851	5987	0.07	Mantou-3
QH6_5	5833	5977	0.07	Mantou-5
FJ3	5771	5974	0.11	CHN-V
HLJ167	5834	5972	0.1	Baijiu
JL4	5709	5969	0.1	CHN-VI
HLJ10	5820	5961	0.1	Baijiu
LJM21_1	5818	5956	0.07	Mantou-2
SACE_MAL	5776	5952	0.08	Malaysian
FJ1	5704	5947	0.09	CHN-VI
CPTOSW	5712	5937	0.15	AfricanPalmWine
SACE_YCL	4788	5934	0.37	SouthAmericaMix2
SACE_YCB	5680	5933	0.15	SouthAfrica
HLJ201	5786	5928	0.09	Baijiu
ABLOSW	5648	5926	0.17	SouthAfrica
WL010	5188	5921	0.18	MosaicsR3
QH3_1	5754	5918	0.11	Mantou-4
YM3_1	5751	5904	0.07	Other
JM28_2	5760	5897	0.07	Other
AHQOSW	4798	5894	0.23	Mantou7
AKCOSW	5719	5889	0.14	AfricanPalmWine
AMMOSW	5700	5889	0.08	Other
TUM508	5723	5889	0.07	Beer
CILOSW	5072	5884	0.26	MosaicsR3
CLGOSW	5253	5880	0.27	MosaicsR3
BR002	5727	5872	0.07	MixOrigin
BCROSW	5643	5865	0.08	MixOrigin
L174	5723	5865	0.06	Other
JM37_2	5706	5857	0.07	Mantou-3
JM28_13	5712	5850	0.07	Other
AKDOSW	5683	5842	0.07	AfricanPalmWine
AKBOSW	5680	5841	0.08	AfricanPalmWine
CJM19_5	5673	5820	0.07	Mantou-2
BBCOSW	5662	5808	0.08	MixOrigin
HN18	5649	5808	0.1	CHN-V
BVBOSW	4397	5799	0.4	Bioethanol
HLJ59	5659	5793	0.08	Baijiu
QH7_4	5656	5789	0.06	Mantou-5
CJM25_4	5660	5786	0.07	Mantou-2
CJM25_5	5655	5786	0.07	Mantou-2
CHNOSW	5637	5773	0.07	MosaicsR3
CJM25_1	5631	5769	0.06	Mantou-2
BE004	3897	5764	0.35	MosaicsBeer
ADFOSW	5603	5762	0.08	AfricanPalmWine
CHPOSW	5617	5752	0.07	MosaicsR3
QH7_2	5617	5752	0.08	Mantou-5
JM8_3	5612	5746	0.06	Mantou-3
QH1_1	5601	5745	0.08	Mantou-4
CJM20_1	5612	5743	0.06	Mantou-3
SACE_YAC	5580	5741	0.09	AfricanPalmWine
AKHOSW	5585	5740	0.07	AfricanPalmWine
TY2_1	5606	5740	0.07	Mantou-6
SXJM9_5	5600	5737	0.06	Mantou-3
ATPOSW	5558	5731	0.15	AfricanPalmWine
UFMG_CM_Y228	5483	5722	0.08	MixOrigin
ARNOSW	5409	5720	0.1	DairyProducts
BHGOSW	3956	5714	0.41	MosaicsR2
APQOSW	5544	5713	0.14	AfricanPalmWine
ADVOSW	5546	5708	0.08	AfricanPalmWine
CGHOSW	5572	5707	0.07	Other
DBL_1	5472	5704	0.08	MixOrigin
JQ9_3	5549	5688	0.07	Other
WJZ1_2	5546	5684	0.07	Mantou-2
HZJZ5_4	5532	5678	0.1	Baijiu
SP007	5534	5678	0.07	Other
HLJ225	5534	5677	0.07	Baijiu
CFFOSW	3831	5662	0.35	MosaicsBeer
CIGOSW	4856	5661	0.26	MosaicsR3
SACE_YBP	5492	5659	0.14	AfricanPalmWine
HZJZ5_5	5518	5658	0.07	Baijiu
CFCOSW	5528	5650	0.06	Beer
L711	5485	5650	0.14	AfricanPalmWine
BE027	3777	5648	0.35	MosaicsBeer
GS5_7	5528	5646	0.06	Mantou-3
CFAOSW	5442	5634	0.08	AfricanPalmWine
CQAOSW	5430	5626	0.07	AfricanPalmWine
L710	5449	5617	0.14	AfricanPalmWine
AKEOSW	5449	5615	0.14	AfricanPalmWine
LJM6A_1	5463	5614	0.07	Mantou-2
JZ1_4	5397	5605	0.07	DairyProducts
[truncated: 1,309 more rows]

## Sheet: Table S5
		ABBA	BABA	TOT	FRACTION (%)		ABBA and BABA position on the codon								ABAA	BAAA	TOT	FRACTION (%)
[truncated: 8 more rows]

[truncated: 4 more sheets: Table S6, Table S7, Table S8, Table S9]
